# Supplementary material for: Hundreds of LncRNAs Display Circadian Rhythmicity in Zebrafish Larvae
Source: Cells. 2021 Nov 15;10(11):3173. doi: 10.3390/cells10113173 (PMC8620895; doi:10.3390/cells10113173)
Supplement: Supplementary file 1 [file cells-10-03173-s001.zip › Supplementary Tables S1-S50.xlsx]

## Sheet: Supplementary Table S1
Supplementary Table S1. Expression profiles of zebrafish larval transcripts under DD condition.
	WTDD120_FPKM	WTDD124_FPKM	WTDD128_FPKM	WTDD132_FPKM	WTDD136_FPKM	WTDD140_FPKM
Danio_rerio_newGene_1	1.6407	2.14336	2.05741	1.75523	2.6506	2.15877
Danio_rerio_newGene_10	2.48674	2.49986	2.22889	1.87652	1.35507	1.63939
Danio_rerio_newGene_10000	0.496964	0.510537	0.748745	0.524172	0.425728	0.613026
Danio_rerio_newGene_10003	1.15583	1.10496	0.949069	0.951678	0.661596	0.6801
Danio_rerio_newGene_10014	0.398448	0.044021	0.928121	0.0935965	0.852502	0.398937
Danio_rerio_newGene_10015	0.322929	0.592046	0.30543	0.7072	0.57299	0.592685
Danio_rerio_newGene_10018	0.436253	0.98373	0.301295	0.861851	0.166827	0.363229
Danio_rerio_newGene_10024	0.072134	0.392513	0.035713	0.457619	0	0.105042
Danio_rerio_newGene_10030	2.81315	2.83365	2.09946	1.82489	2.29075	2.68628
Danio_rerio_newGene_1004	0.0304755	0.091516	0	0.0286935	0.0676895	0
Danio_rerio_newGene_10040	6.88963	6.72965	8.01388	5.12855	4.47275	7.86491
Danio_rerio_newGene_10044	0.128592	0	0.390687	0.38874	0	0.164673
Danio_rerio_newGene_10046	1.2861	0.972185	1.65735	1.27695	0.528987	0.811014
Danio_rerio_newGene_10050	1.73483	2.18347	1.90129	1.75391	2.67995	2.69698
Danio_rerio_newGene_10051	0.280068	0.112717	0.874467	0.258116	0.233512	0.155092
Danio_rerio_newGene_10056	1.2454	1.21961	0.506019	1.53307	1.06883	1.03467
Danio_rerio_newGene_10058	0.10666	0.424107	0.465151	0.33425	0.111331	0.278073
Danio_rerio_newGene_10065	8.12043	3.64523	6.63897	6.61992	6.13203	6.7141
Danio_rerio_newGene_10066	0	0.213461	0.106563	0	0.154815	0.0648345
Danio_rerio_newGene_10067	2.39133	2.48183	2.23139	2.48743	2.42796	2.28071
Danio_rerio_newGene_10070	0	0.267246	0.349443	0.174021	0.386539	0.167321
Danio_rerio_newGene_10071	0.133996	0.017884	0.102678	0.145272	0.198875	0.064192
Danio_rerio_newGene_10074	1.79577	0.859986	1.59389	0.984419	0.720465	0.751905
Danio_rerio_newGene_10075	0.202913	0.054998	0.028635	0.18566	0	0.0493835
Danio_rerio_newGene_10081	0.920171	0.726016	0.817199	0.612152	0.506918	0.739558
Danio_rerio_newGene_10082	1.40456	1.83377	1.40787	1.44943	1.45422	1.54459
Danio_rerio_newGene_10084	1.61314	2.09207	1.32032	1.86361	1.4277	2.1929
Danio_rerio_newGene_10086	0.116165	0.231914	0.0597035	0.0723915	0	0.136298
Danio_rerio_newGene_10100	4.0984	3.27289	5.64239	6.06505	4.83698	5.1889
Danio_rerio_newGene_10102	0.34421	0.148565	0.184066	0.236222	0.153164	0.076332
Danio_rerio_newGene_10104	0.089868	0	0.022062	0	0.0151925	0.0533215
Danio_rerio_newGene_10105	0.519138	0.790889	0.454353	0.277745	0.635419	0.420156
Danio_rerio_newGene_10106	0.397602	0.403724	0.0902035	0.462883	0.492418	0.292678
Danio_rerio_newGene_10108	0.271545	0.501293	0.017055	0.398477	0.207628	0.436181
Danio_rerio_newGene_10120	1.09886	1.66253	1.50564	1.8055	1.73186	2.22853
Danio_rerio_newGene_10135	0.377111	0.528745	0	0.604598	0.26731	0.251045
Danio_rerio_newGene_10140	0.169158	0.367158	0.299824	0.34274	0.901899	0.218531
Danio_rerio_newGene_10146	27.7266	36.4516	32.4585	34.7399	36.9868	35.4682
Danio_rerio_newGene_10162	1.38428	1.4127	1.25444	1.47167	1.48508	2.19933
Danio_rerio_newGene_10170	1.82685	1.32205	1.69135	1.43847	1.29072	1.4813
Danio_rerio_newGene_10173	0.0757135	0.191775	0.14331	0.1763	0	0.051552
Danio_rerio_newGene_10188	0.194417	0.236926	0.046132	0.164341	0.153986	0.436151
Danio_rerio_newGene_10189	1.23952	0.860014	0.521321	0.892727	0.876993	0.883336
Danio_rerio_newGene_10197	1.74192	2.59615	1.44923	2.04831	2.52003	2.62042
Danio_rerio_newGene_10198	0.309112	0.222571	0.0448055	0.317132	0.173089	0.270594
Danio_rerio_newGene_10221	0	0	0.042496	0	0.0452635	0.167095
Danio_rerio_newGene_10241	2.79772	3.97086	2.8387	3.14335	3.78877	3.8397
Danio_rerio_newGene_10246	5.05487	8.57727	4.8541	5.80974	6.29488	7.47835
Danio_rerio_newGene_10274	0.281687	0.267474	0.0721865	0.041501	0.0789165	0.267613
Danio_rerio_newGene_10318	1.9749	2.5915	1.80865	2.32971	2.25559	2.68414
Danio_rerio_newGene_10332	0.86852	0.995834	0.69263	0.792097	0.704211	0.650057
Danio_rerio_newGene_10337	7.18167	9.41487	8.99336	8.49974	9.36397	10.6586
Danio_rerio_newGene_10350	0.53213	0.373123	0.44464	0.553865	0.447124	0.765752
Danio_rerio_newGene_10352	0.307088	0.876319	0.352338	0.635605	0.590462	0.910124
Danio_rerio_newGene_10372	0.552229	0.454826	0.298814	0.411347	0.291887	0.561295
Danio_rerio_newGene_10394	0.138732	0.329574	0.189239	0.13982	0.073627	0.112242
Danio_rerio_newGene_10405	0.331554	0.145494	0.226005	0.116549	0.21495	0.135862
Danio_rerio_newGene_10406	0.786382	0.521355	0.369135	0.523568	0.448966	0.403151
Danio_rerio_newGene_10413	0	0.279618	0	0.346542	0	0.246646
Danio_rerio_newGene_10449	1.47087	1.84452	1.52651	1.07969	1.08269	1.22461
Danio_rerio_newGene_10450	12.8069	12.4846	9.13738	8.15443	6.48599	4.91656
Danio_rerio_newGene_10457	0.177661	0.275539	0.366243	0.230685	0.220431	0.207147
Danio_rerio_newGene_10459	1.70105	2.09764	0.985047	1.10607	1.88647	1.73324
Danio_rerio_newGene_10462	0.269492	0.164381	0	0.162919	0.035313	0.155036
Danio_rerio_newGene_10463	0.056382	0.0435135	0.0163905	0	0.379554	0.190024
Danio_rerio_newGene_10475	0.836536	0.650324	0.752292	0.303974	0.508431	0.643278
Danio_rerio_newGene_10506	0.683141	0.838943	0.5321	0.760408	1.47455	0.849317
Danio_rerio_newGene_10513	0.3445	0.274002	0	0.381111	0.289791	0.091161
Danio_rerio_newGene_10517	15.7372	0.907183	12.1013	6.16095	2.03355	3.13623
Danio_rerio_newGene_10536	0.200547	0	0.0627765	0.110414	0	0.170946
Danio_rerio_newGene_10537	0.058822	0.993923	0.12993	0.262213	1.04281	1.26151
Danio_rerio_newGene_10540	0.365302	0.51328	0.342264	0.27612	0.440144	0.36524
Danio_rerio_newGene_10541	0.133347	0.291687	0.041012	0.093622	0.335145	0.267213
Danio_rerio_newGene_10553	2.49703	2.64108	2.35013	2.53705	3.26606	2.80277
Danio_rerio_newGene_10559	21.2195	20.637	20.2178	19.983	20.2919	21.329
Danio_rerio_newGene_10570	0.146258	0.336033	0.359322	0.317299	0.169352	0.513311
Danio_rerio_newGene_10574	0.0956925	0.377405	0.087595	0.203834	0	0.517605
Danio_rerio_newGene_10589	0.642616	0.472782	0.823955	0.509861	0.422813	0.316958
Danio_rerio_newGene_10590	1.98351	2.32504	2.34082	2.2007	2.63819	2.46673
Danio_rerio_newGene_106	3.64727	2.69532	1.9462	2.24905	2.9111	2.31212
Danio_rerio_newGene_10618	0.154217	0.213241	0.13243	0.258277	0.172498	0.246587
Danio_rerio_newGene_10622	0.392949	0.224269	0.434983	0.35975	0.260917	0.404813
Danio_rerio_newGene_10681	5.19112	6.13736	5.05086	4.78878	5.84233	6.40284
Danio_rerio_newGene_10685	1.79002	1.94506	2.0924	2.09753	2.3131	1.51614
Danio_rerio_newGene_10686	1.0393	1.69813	0.604856	1.37244	1.40171	1.6034
Danio_rerio_newGene_10688	0.465441	0.26374	0.314239	0.315319	0.218086	0.209633
Danio_rerio_newGene_10697	0.0388615	0	0	0	0.0377225	0
Danio_rerio_newGene_107	7.64895	7.07986	5.25041	4.03461	4.42463	5.10895
Danio_rerio_newGene_10703	7.56798	6.46228	5.29239	3.72746	3.72091	2.85654
Danio_rerio_newGene_10711	5.76776	6.39715	5.9973	7.29373	7.38112	7.32698
Danio_rerio_newGene_10718	6.35535	6.56811	5.90241	5.40775	6.95263	7.56285
Danio_rerio_newGene_10722	0.105347	0.0554355	0.348372	0	0.087581	0.166169
Danio_rerio_newGene_10731	0.840247	0.917271	0.809287	0.816266	0.651977	0.640351
Danio_rerio_newGene_10732	2.64661	3.60172	3.81138	4.35748	3.99124	3.95208
Danio_rerio_newGene_10741	1.92515	1.34282	1.2317	1.50202	1.0073	0.546746
Danio_rerio_newGene_10743	0.741816	0.75971	0.66618	0.941646	0.798488	0.915266
Danio_rerio_newGene_10746	3.27554	3.56874	2.2141	2.92884	2.43755	4.26757
Danio_rerio_newGene_10760	6.47326	8.19848	7.09072	7.58831	9.91206	8.77456
Danio_rerio_newGene_10769	0.453585	0.370414	0.250472	0.31605	0.584406	0.374683
Danio_rerio_newGene_10771	1.22262	0.840315	1.24665	1.95405	1.05436	0.820971
Danio_rerio_newGene_10773	3.15623	3.41324	3.37305	3.81944	2.78082	3.42927
Danio_rerio_newGene_10774	6.53912	5.23296	5.384	5.33971	5.22066	4.94233
Danio_rerio_newGene_10778	0.582553	0.57689	0.868894	0.54426	0.740773	0.9043
Danio_rerio_newGene_10781	8.00781	6.91314	6.81949	7.64906	7.25385	7.63684
Danio_rerio_newGene_10786	0.434261	0.38363	0.754323	0.661271	0.290772	0.605262
Danio_rerio_newGene_10788	1.34723	2.16421	2.35993	2.91834	2.3068	3.0838
Danio_rerio_newGene_10789	7.63833	10.5588	10.5589	14.7324	17.7614	14.1536
Danio_rerio_newGene_10791	1.71772	1.71921	1.58306	2.26729	1.62365	1.25115
Danio_rerio_newGene_10792	5.03331	5.11896	4.76641	4.53271	5.18651	5.4081
Danio_rerio_newGene_10802	4.13208	4.83235	4.38423	4.76879	4.74722	5.44681
Danio_rerio_newGene_10811	1.18522	1.14159	1.99648	0.791969	1.04915	1.49845
Danio_rerio_newGene_10813	2.71887	2.64063	3.44382	2.85496	3.24467	3.63084
Danio_rerio_newGene_10816	4.82772	5.775	4.85719	5.38694	6.06397	6.40051
Danio_rerio_newGene_10821	1.13482	0.965357	1.40732	0.849155	0.689813	0.514493
Danio_rerio_newGene_10825	3.88677	4.1777	3.90569	3.96989	3.64735	3.0296
Danio_rerio_newGene_10827	0.842491	1.08182	0.559626	1.12298	1.21496	1.07582
Danio_rerio_newGene_10829	1.28178	1.46432	2.18918	2.55378	1.78452	2.06459
Danio_rerio_newGene_10834	0.782552	0.646617	0.7933	0.691133	0.571918	0.569474
Danio_rerio_newGene_10835	0.90272	0.844256	1.18987	1.00373	0.910507	0.54375
Danio_rerio_newGene_10837	0.722397	0.456641	0.565621	0.758771	0.347282	0.385744
Danio_rerio_newGene_10840	2.80753	2.07955	2.51865	2.88915	2.35684	3.22383
Danio_rerio_newGene_10842	0	0.373831	0.0445335	0	0.153685	0.238149
Danio_rerio_newGene_10843	0.093544	0.152627	0.180696	0.07984	0.100495	0.0848925
Danio_rerio_newGene_10865	7.53352	7.70881	5.87934	7.86561	8.11466	9.85422
Danio_rerio_newGene_10866	0.05897	0.057489	0.0445585	0.0738255	0.078773	0.0105715
Danio_rerio_newGene_10880	0.800996	0.865582	0.836131	0.666651	0.501279	0.592474
Danio_rerio_newGene_109	4.93255	3.36581	3.04902	2.38959	2.70207	2.2665
Danio_rerio_newGene_10925	0.12991	0.133439	0.21071	0.202528	0.190734	0.176204
Danio_rerio_newGene_10927	0.824151	0.385524	0.833438	0.683511	0.475904	0.389977
Danio_rerio_newGene_10932	2.10623	2.07777	1.87757	2.17927	2.20355	2.51474
Danio_rerio_newGene_10934	0	0	0	0.257383	0.131098	0.057241
Danio_rerio_newGene_10937	0.343584	0.162006	0.342874	0.237887	0.161165	0.352396
Danio_rerio_newGene_10947	1.40503	2.09908	1.65373	1.47649	1.69091	1.65688
Danio_rerio_newGene_10950	0.493812	0.471039	0.507716	1.00346	0.794242	1.02239
Danio_rerio_newGene_10952	1.99204	1.95529	2.20636	2.11856	1.98781	3.16329
Danio_rerio_newGene_10954	0.700848	1.52136	1.05769	1.21015	0.970461	1.35473
Danio_rerio_newGene_10958	3.97762	4.22705	3.90934	3.82932	4.22261	4.34228
Danio_rerio_newGene_10959	0.121501	0	0.160419	0.299863	0.065426	0.082362
Danio_rerio_newGene_10960	1.25873	0.716047	1.71415	1.15576	1.36422	0.982554
Danio_rerio_newGene_10961	0.539013	0.443937	0.210933	0.128029	0.389697	0.545195
Danio_rerio_newGene_10962	1.4381	0.983137	1.13994	0.928632	0.801349	0.692554
Danio_rerio_newGene_10965	1.78119	2.22174	2.90813	3.16858	2.53757	2.30511
Danio_rerio_newGene_10971	4.44866	6.87967	4.26754	4.48851	4.95569	5.14133
Danio_rerio_newGene_10972	0.423455	0.113503	0.020092	0.184773	0	0.270709
Danio_rerio_newGene_10977	6.21664	4.70446	4.73801	4.35008	4.36886	4.24024
Danio_rerio_newGene_10988	0.157981	0.232599	0.377062	0.454331	0.263246	0.133973
Danio_rerio_newGene_10997	0.920607	0.957127	0.913176	0.970684	0.948967	0.854966
Danio_rerio_newGene_11	1.49459	1.33939	1.4915	1.73418	1.89792	1.94001
Danio_rerio_newGene_11000	0.136566	0.107947	0	0	0.152212	0.0620965
Danio_rerio_newGene_11003	0	0.158785	0.105133	0.132718	0	0
Danio_rerio_newGene_11008	1.9682	2.69268	2.23139	2.48921	2.37502	2.01355
Danio_rerio_newGene_1102	0.292215	0.089404	0.145179	0.417853	0.105283	0.0235975
Danio_rerio_newGene_11020	0.136024	0.532698	0.316447	0.221334	0.250509	0.193518
Danio_rerio_newGene_11024	0.102052	0.105324	0.11699	0.122575	0.076042	0.042827
Danio_rerio_newGene_1103	15.5909	28.5366	9.50832	17.8051	37.9222	27.5456
Danio_rerio_newGene_1109	0.219275	0.304716	0.201664	0.170189	0.276648	0.35773
Danio_rerio_newGene_11096	0	0.188379	0.0945165	0	0	0
Danio_rerio_newGene_111	2.95999	5.10717	1.99711	2.90419	4.52861	5.14074
Danio_rerio_newGene_11122	0.636393	0.658913	0.545712	0.342406	0.409388	0.448628
Danio_rerio_newGene_11144	4.41903	3.7801	4.37467	5.20225	3.51401	3.80074
Danio_rerio_newGene_11146	2.62669	2.61434	2.47745	2.31151	1.84415	3.05515
Danio_rerio_newGene_11148	0.367804	0.304399	0.439202	0.208917	0.138963	0.308979
Danio_rerio_newGene_11152	1.60451	2.22485	1.36847	1.44796	1.35047	1.72278
Danio_rerio_newGene_11154	2.79373	2.62447	3.04004	2.14921	2.52627	2.97447
Danio_rerio_newGene_11160	1.68809	1.64205	1.51219	1.07545	1.48858	1.64625
Danio_rerio_newGene_11161	0.47746	0.592364	0.233383	0.281467	0.245738	0.571163
Danio_rerio_newGene_11178	13.0376	1.57631	10.8145	2.17343	3.38715	1.73031
Danio_rerio_newGene_11188	0.531594	0.238492	0.329809	0.41858	0.202025	0.399401
Danio_rerio_newGene_11190	0.086962	0.099773	0.082746	0.0821845	0.128303	0.072311
Danio_rerio_newGene_11197	1.26257	0.860564	0.969705	0.75009	0.825072	0.99144
Danio_rerio_newGene_11202	2.70938	3.19875	3.49502	2.66148	2.83406	2.83499
Danio_rerio_newGene_11212	6.5186	6.44612	8.34037	7.57379	7.08141	6.64227
Danio_rerio_newGene_11214	5.093	5.79975	4.75929	7.58523	7.2798	6.24134
Danio_rerio_newGene_11217	0.475073	0.187002	0.391641	0.579175	0.301328	0.186179
Danio_rerio_newGene_11227	0.635927	0.767603	0.880868	0.444141	1.06419	1.51419
Danio_rerio_newGene_11233	0	0.209108	0.596313	0.181458	0	0
Danio_rerio_newGene_11241	0.125833	0.280207	0.138397	0.241187	0.20751	0.342226
Danio_rerio_newGene_11243	2.78339	2.38444	2.63634	2.5346	2.38087	3.18162
Danio_rerio_newGene_11260	0	0	0	0	0.271417	0
Danio_rerio_newGene_11271	0.383738	0.773447	0.403046	0.569017	1.26362	0.875852
Danio_rerio_newGene_11291	0.303995	0.090653	0.0914655	0	0.221836	0.15277
Danio_rerio_newGene_113	3.64266	3.56355	3.47095	2.76202	3.53027	2.71483
Danio_rerio_newGene_11311	0.749675	0.563617	0.592724	0.526996	0.83592	0.528161
Danio_rerio_newGene_11314	0	0	0	0	0	0
Danio_rerio_newGene_11317	2.21409	2.29051	2.03158	1.93419	2.35108	2.77282
Danio_rerio_newGene_1134	0.981238	0.56155	1.36677	0.788755	0.666146	0.799744
Danio_rerio_newGene_1136	0.0613665	0.0593325	0.0578565	0.0783405	0.0522125	0.0230965
Danio_rerio_newGene_11369	0.133279	0.047457	0.244009	0.206233	0.188032	0.029541
Danio_rerio_newGene_1139	2.94742	4.02962	2.3945	2.38529	3.05864	3.84755
Danio_rerio_newGene_11391	0.710643	0.7134	0.62339	0.550226	0.372407	0.322695
Danio_rerio_newGene_11408	0.940068	1.16721	1.09856	0.795206	0.274511	0.839716
Danio_rerio_newGene_1141	5.99637	7.06665	5.24972	7.45581	7.51925	8.02429
Danio_rerio_newGene_11416	2.12266	1.50025	1.19166	1.30159	1.31846	0.794111
Danio_rerio_newGene_1142	1.8633	3.34638	2.69087	2.50205	3.42378	3.78503
Danio_rerio_newGene_11427	0.163595	0.473032	0.208694	0.519521	0.338341	0.198307
Danio_rerio_newGene_1145	0.09094	0.178487	0.260124	0	0	0.401728
Danio_rerio_newGene_1146	0.475432	1.01616	0.5477	0.590046	0.949233	0.817921
Danio_rerio_newGene_11460	2.0063	2.91294	2.4107	2.64428	2.63139	2.85921
Danio_rerio_newGene_1147	2.16361	2.22901	1.84767	2.24631	2.1659	2.20394
Danio_rerio_newGene_11479	0.395126	0.329386	0.472008	0.456537	0.295094	0.250659
Danio_rerio_newGene_11483	0	0.069321	0.19821	0.133865	0.0246515	0
Danio_rerio_newGene_11485	2.76215	9.09663	8.19907	12.1838	1.69837	0.682126
Danio_rerio_newGene_11489	0	0	0	0	0	0
Danio_rerio_newGene_1149	4.72848	4.85566	4.17374	4.18723	4.28477	5.12053
Danio_rerio_newGene_11493	1.35582	2.04143	1.89844	2.8085	2.82023	2.33635
Danio_rerio_newGene_11494	0.863175	0.877692	0.454971	0.495988	0.785444	0.882784
Danio_rerio_newGene_11522	1.1741	1.41838	1.46963	1.50273	1.64743	2.13175
Danio_rerio_newGene_11526	1.29356	1.64299	1.58573	2.57418	2.84144	2.85358
Danio_rerio_newGene_11528	0.308402	0.144331	0.0300585	0.356292	0.165053	0.383971
Danio_rerio_newGene_11535	1.19662	0.933677	0.672387	1.39272	0.342902	0.573089
Danio_rerio_newGene_11538	0.162106	0	0.10125	0.27746	0.0353195	0.070631
Danio_rerio_newGene_11539	3.79238	3.10751	2.266	2.2035	2.13242	1.9814
Danio_rerio_newGene_11540	3.98657	3.63424	3.25912	2.33336	2.96831	2.93502
Danio_rerio_newGene_11544	2.50607	2.03094	1.87843	2.66647	1.37679	2.43283
Danio_rerio_newGene_11547	0.0992525	0.337226	0	0.232129	0.612071	0.145905
Danio_rerio_newGene_11548	0.407842	0.235195	0.515595	0.5335	0.413218	0.51362
Danio_rerio_newGene_1156	15.4373	16.6272	16.4522	17.7923	16.2413	20.5456
Danio_rerio_newGene_11561	15.1027	13.6273	11.9555	11.7988	11.5115	11.873
Danio_rerio_newGene_11563	0.074622	0.037532	0.101507	0	0.269155	0.21561
Danio_rerio_newGene_11582	0.935966	0.325029	0.199331	0.2085	0.257032	0.178644
Danio_rerio_newGene_11590	1.43109	0.962144	1.09319	2.44134	0.638643	1.10714
Danio_rerio_newGene_11595	0.078831	0.050901	0.178625	0.423783	0.660681	0
Danio_rerio_newGene_11596	2.48936	2.97685	3.00312	3.09006	2.89871	3.38464
Danio_rerio_newGene_11607	0.959894	0.0792875	0.128034	0.288057	0.552018	0.389328
Danio_rerio_newGene_11626	8.06365	7.43023	6.97771	8.43417	8.51245	9.48668
Danio_rerio_newGene_11632	0.015255	0.122161	0	0	0	0
Danio_rerio_newGene_11634	0.337757	0.369683	0.0968815	0.40246	0.341075	0.252346
Danio_rerio_newGene_11635	0	0.275608	0	0.400196	0.101387	0.158165
Danio_rerio_newGene_11654	6.07397	6.66218	5.89274	4.49887	4.47053	3.68538
Danio_rerio_newGene_11656	0.158819	0.143005	0.114434	0.153207	0.080159	0.065208
Danio_rerio_newGene_11657	0.103097	0.123169	0.228483	0.187206	0.191987	0.226597
Danio_rerio_newGene_11667	0.511782	0.563616	0.304026	0.424548	0.739448	0.62278
Danio_rerio_newGene_11671	5.03976	3.74084	5.0079	4.8142	4.82508	5.25316
Danio_rerio_newGene_11679	0.988196	1.30331	0.744491	1.19079	0.954417	1.35061
Danio_rerio_newGene_11682	1.0911	1.90173	1.28019	1.1728	1.2466	1.1686
Danio_rerio_newGene_1169	0.826548	1.57253	0.837519	1.13579	1.23049	1.23537
Danio_rerio_newGene_11691	1.51935	0.198222	0.862552	0.541433	0.262115	0.347312
Danio_rerio_newGene_11698	2.78957	2.36185	3.807	4.5446	2.84385	3.64288
Danio_rerio_newGene_11703	1.96809	2.79321	4.89207	3.70739	2.6673	3.34159
Danio_rerio_newGene_11707	0.136424	0.339416	0.526944	0.201893	0.205083	0.324528
Danio_rerio_newGene_11708	0.130825	0.133022	0.318573	0	0.39422	0.401622
Danio_rerio_newGene_11709	0.175245	0.118557	0.333989	0.280574	0.026718	0.295801
Danio_rerio_newGene_1171	1.19335	1.51478	1.15855	1.46947	1.79037	1.42422
Danio_rerio_newGene_11715	0.404013	0.0935785	0	0.243221	0.38498	0
Danio_rerio_newGene_11717	0.678539	0.49409	0.686815	0.518451	0.574075	0.756729
Danio_rerio_newGene_11718	0.979449	0.613368	0.885119	0.815908	1.44262	1.2821
Danio_rerio_newGene_11721	2.99122	2.54222	3.1527	1.98173	2.19214	3.22123
Danio_rerio_newGene_11723	2.19785	1.67975	2.09748	1.08307	2.05223	1.62235
Danio_rerio_newGene_11726	1.05226	0.816877	1.01613	0.63668	0.771294	0.878023
Danio_rerio_newGene_11728	1.41766	2.03356	1.29415	1.15599	2.22574	1.80266
Danio_rerio_newGene_11729	0	0.053101	0.088012	0.0134755	0	0.0213795
Danio_rerio_newGene_11731	7.71214	10.3414	8.08122	9.59134	8.73336	11.0195
Danio_rerio_newGene_11733	4.39109	8.39383	6.88612	8.06831	4.41175	6.93733
Danio_rerio_newGene_11737	1.22503	1.20176	1.64844	1.32772	1.47611	1.32757
Danio_rerio_newGene_11742	0	0.0989165	0.109074	0.037223	0.094442	0.0443905
Danio_rerio_newGene_11745	21.2441	17.6523	19.0722	20.6686	15.6827	19.5096
Danio_rerio_newGene_11746	0.940176	1.13166	1.35254	1.53662	0.806691	1.4798
Danio_rerio_newGene_11748	3.34876	5.32615	3.57549	3.37068	3.11241	3.54091
Danio_rerio_newGene_11753	0.398996	0.426261	0.213799	0.459775	0.376891	0.703894
Danio_rerio_newGene_11765	1.67737	1.98781	1.68474	2.21894	1.96961	2.42319
Danio_rerio_newGene_11772	1.14617	2.09293	0.954721	0.859438	1.38502	0.707773
Danio_rerio_newGene_11773	4.2875	4.66247	2.68998	3.16419	4.0739	3.71564
Danio_rerio_newGene_11774	0.0518385	0.381404	0	0.0426295	0.018587	0.190976
Danio_rerio_newGene_11775	3.63238	4.12065	5.416	6.1011	5.47935	7.10529
Danio_rerio_newGene_11781	0.685846	0.585868	0.836776	0.748235	0.968179	0.826596
Danio_rerio_newGene_11783	3.17784	5.10783	4.18831	5.59176	5.12858	6.0597
Danio_rerio_newGene_11785	5.43291	7.14626	4.68239	6.24109	7.72097	8.04972
Danio_rerio_newGene_11786	1.52548	1.98978	2.97966	2.33944	2.05014	2.89939
Danio_rerio_newGene_11797	1.03449	1.16334	0.450456	0.507691	0.888337	0.916247
Danio_rerio_newGene_11798	0.302638	0.423153	0.235531	0.0995285	0.227129	0.301691
Danio_rerio_newGene_11801	2.07724	2.17576	2.79929	2.82421	2.97544	2.27078
Danio_rerio_newGene_11803	1.51654	1.43827	2.14995	1.49687	1.69325	1.28611
Danio_rerio_newGene_11814	2.1611	1.64792	1.81625	1.59355	2.11522	1.90641
Danio_rerio_newGene_11816	0.193884	0.166636	0.147048	0.218792	0.284464	0.422128
Danio_rerio_newGene_11818	1.04567	1.17673	1.46695	1.09196	0.618302	1.17189
Danio_rerio_newGene_11819	0.788896	1.12683	0.949094	1.14705	1.107	1.34168
Danio_rerio_newGene_1182	1.3464	1.75899	0.77852	1.83627	1.43169	1.43259
Danio_rerio_newGene_11821	1.05241	1.13962	1.38877	1.24104	1.20115	1.34868
Danio_rerio_newGene_11824	0.235648	0.100378	0	0	0.13268	0.051695
Danio_rerio_newGene_11827	2.10247	2.0604	2.36246	2.05427	2.7006	2.22433
Danio_rerio_newGene_11839	0.812404	0.865741	1.36585	1.7376	1.6981	1.33386
Danio_rerio_newGene_11846	1.16047	1.78632	1.30781	1.78046	1.40215	1.50859
Danio_rerio_newGene_11847	0.475708	0.424789	0.432916	0.360036	0.457711	0.114287
Danio_rerio_newGene_11887	0.032784	0.0915815	0.329295	0.0552105	0.029385	0.021326
Danio_rerio_newGene_11888	0.158285	0.029405	0.08912	0.212232	0.14931	0.179895
Danio_rerio_newGene_11890	0	0	0	0	0	0
Danio_rerio_newGene_11895	0.0504655	0.290075	0	0.209993	0	0.142759
Danio_rerio_newGene_11899	2.72331	3.93915	2.61034	2.79259	3.40651	3.72158
Danio_rerio_newGene_11911	0.677741	0.382837	0.667571	0.714317	0.260576	0.540266
Danio_rerio_newGene_11915	0.0987465	0.2127	0.068191	0.173465	0.10607	0.337178
Danio_rerio_newGene_11937	0.0749865	0.172156	0.170915	0.0823805	0.184263	0.190736
Danio_rerio_newGene_11952	0.062016	0.306338	0.0409035	0.104962	0.196731	0.351422
Danio_rerio_newGene_11970	0.229859	0.178775	0.09139	0.157945	0.071897	0.110341
Danio_rerio_newGene_11973	0	0.390778	0.505803	0.27879	0.0651495	0
Danio_rerio_newGene_11989	1.81248	2.12329	1.38146	1.11705	1.11094	2.19705
Danio_rerio_newGene_11994	0.592426	1.56654	0.488807	0.995587	1.60965	1.22235
Danio_rerio_newGene_12016	0.059056	0.191861	0.137304	0.111355	0.748214	0.721654
Danio_rerio_newGene_12023	0.126953	0.114616	0	0.135655	0.19737	0.039249
Danio_rerio_newGene_12031	0.169917	0.160127	0.182117	0.178993	0.190317	0.185997
Danio_rerio_newGene_1204	1.32823	1.46493	1.2225	1.04132	1.77039	1.16358
Danio_rerio_newGene_12040	0.494432	0.216373	0.0775365	0.151504	0.172378	0.274634
Danio_rerio_newGene_12059	0	0.523985	0.84111	0.413396	0.217686	0.052847
Danio_rerio_newGene_12062	0.053001	0.071724	0.076628	0	0.0594935	0.339941
Danio_rerio_newGene_12065	0	0.306483	0.0553085	0.1027	0	0
Danio_rerio_newGene_1209	12.8528	9.24409	10.2985	9.5154	8.75762	8.8607
Danio_rerio_newGene_12092	0	0.328019	0	0	0	0
Danio_rerio_newGene_12099	0.144462	0.235897	0	0	0	0.35011
Danio_rerio_newGene_12101	0.510024	0.971855	0.75724	0.698962	1.25081	0.636111
Danio_rerio_newGene_1212	10.4681	9.53768	7.43189	7.08792	8.63126	7.869
Danio_rerio_newGene_12137	0	0.030644	0.147379	0.0753315	0.0211105	0.103816
Danio_rerio_newGene_12138	0	0	0.0609025	0	0	0.042318
Danio_rerio_newGene_12140	0.389061	0.362096	0.296787	0.379043	0.339915	0.459713
Danio_rerio_newGene_12141	0.363629	0.332921	0.552424	0.486011	0.479695	0.540396
Danio_rerio_newGene_1215	2.24395	2.49928	2.80281	1.90764	2.71453	2.85562
Danio_rerio_newGene_12158	0.842093	0.806579	0.933771	0.979729	0.738661	0.869123
Danio_rerio_newGene_12159	0.329861	0.83086	0.71961	0.452598	0.563322	0.692895
Danio_rerio_newGene_1216	4.07857	4.27435	4.08806	4.93114	5.2075	5.14689
Danio_rerio_newGene_12167	1.10496	1.30097	0.995635	1.11118	1.52083	1.68436
Danio_rerio_newGene_12182	0.551172	0.386698	0.282268	0.364731	0.295968	0.22183
Danio_rerio_newGene_122	0.958546	1.18464	1.08501	0.920312	1.00907	0.796534
Danio_rerio_newGene_12205	0	0	0	0.566004	0	0.112133
Danio_rerio_newGene_12209	0.351677	0.408641	0.173942	0.257849	0.123839	0.318722
Danio_rerio_newGene_1221	2.35752	1.35058	1.43277	1.24452	1.31306	1.38802
Danio_rerio_newGene_12217	0.299533	0.233829	0.103598	0.192527	0.085536	0.055432
Danio_rerio_newGene_12229	0.473116	0.375561	0.205898	0.655913	0.54043	0.501748
Danio_rerio_newGene_1223	8.8237	8.38701	7.91704	7.20084	7.53296	6.35543
Danio_rerio_newGene_1224	9.60774	11.6631	7.05566	9.34418	8.66104	12.3866
Danio_rerio_newGene_12254	4.35457	4.82637	3.8793	4.21706	3.93632	4.57845
Danio_rerio_newGene_12259	0.529308	0.652167	0.553754	0.613284	0.465438	0.275389
Danio_rerio_newGene_12260	1.50088	1.38736	1.13647	1.0211	0.689747	0.971548
Danio_rerio_newGene_1227	10.476	10.1895	8.20872	11.1413	10.1133	12.4936
Danio_rerio_newGene_12278	0.347821	0.456708	0.535141	0.612147	0.306983	0.489642
Danio_rerio_newGene_12285	1.78218	2.03704	1.43443	1.84111	1.42874	2.33264
Danio_rerio_newGene_12307	0.379567	0.235252	0.10275	0.10807	0.206366	0.181145
Danio_rerio_newGene_1232	0.332964	0.111232	0.185228	0.373275	0	0
Danio_rerio_newGene_12320	0.317983	0.64308	0.396732	0.280905	0.677015	0.681394
Danio_rerio_newGene_12328	2.81046	3.30679	3.88617	3.1916	3.45635	4.11454
Danio_rerio_newGene_12330	4.77767	4.7482	4.19975	4.22277	3.30452	4.00293
Danio_rerio_newGene_12335	9.98683	12.1757	9.56296	10.6167	12.6458	12.9207
Danio_rerio_newGene_1234	4.12105	3.55348	3.40969	3.68982	4.5516	4.24884
Danio_rerio_newGene_12344	4.595	5.88328	5.20033	5.64134	4.00005	6.10106
Danio_rerio_newGene_12349	11.0351	15.3585	13.2238	15.3028	16.356	14.3624
Danio_rerio_newGene_12354	0.528216	1.24257	0.901393	0.848889	1.00375	1.23802
Danio_rerio_newGene_12357	3.75704	3.67338	3.57793	3.56075	3.99758	3.66912
Danio_rerio_newGene_12358	4.4227	4.98189	4.50589	5.56156	5.87545	4.26007
Danio_rerio_newGene_1236	6.53312	7.61008	7.68029	9.63958	10.6414	8.85448
Danio_rerio_newGene_12367	3.21856	4.12995	3.15848	3.70036	3.89059	3.24384
Danio_rerio_newGene_12372	1.07073	0.775828	0.528335	0.465006	0.643262	0.456508
Danio_rerio_newGene_12382	1.04289	1.10971	1.21891	0.857105	0.823929	1.53973
Danio_rerio_newGene_12383	1.01241	1.28174	1.19524	1.46502	1.05601	1.18242
Danio_rerio_newGene_12386	0.230857	0.061997	0.0525955	0.143145	0.142684	0.138564
Danio_rerio_newGene_12399	3.81538	6.44881	4.76761	6.59808	6.37074	6.77415
Danio_rerio_newGene_12404	1.11283	0.756266	1.30862	0.730309	0.787722	1.05676
Danio_rerio_newGene_12409	1.12734	1.10089	1.21801	1.13655	1.01896	1.24163
Danio_rerio_newGene_12411	0.899707	0.544589	0.876623	0.814287	0.580996	0.931088
Danio_rerio_newGene_12412	0.173344	0.667087	0.266848	2.17528	0.515688	0.36071
Danio_rerio_newGene_12413	0	0	0.262179	0	0.192699	0
Danio_rerio_newGene_12420	2.86901	2.02314	1.61515	1.71489	1.83064	2.46195
Danio_rerio_newGene_12421	3.74196	3.26125	4.28448	3.50972	3.28579	3.39023
Danio_rerio_newGene_12430	4.82829	6.55139	4.85603	5.67904	5.6983	5.77167
Danio_rerio_newGene_12431	4.50231	6.3439	4.1018	5.72242	5.95453	6.03626
Danio_rerio_newGene_12440	0.521869	0.478384	0.405197	0.199143	0.333376	0.623966
Danio_rerio_newGene_12445	0.114227	0.06635	0.549739	0.152325	0.158511	0.105377
Danio_rerio_newGene_12446	1.70589	1.5787	1.81272	1.71594	1.52758	2.02524
Danio_rerio_newGene_12447	0.894911	0.915269	1.06154	0.816028	0.824703	1.62212
Danio_rerio_newGene_12448	1.6425	1.36543	1.35443	1.466	1.29142	1.59698
Danio_rerio_newGene_12457	0.323697	0.226795	0.276875	0.238192	0.219415	0.0954965
Danio_rerio_newGene_12458	3.42184	3.80724	3.42996	3.1638	3.16333	3.10515
Danio_rerio_newGene_1246	0.617222	0.504621	0.55974	0.357589	0.450861	0.535114
Danio_rerio_newGene_1247	2.63009	2.68862	2.74527	3.0359	2.96683	3.26792
Danio_rerio_newGene_12472	2.46553	2.9506	2.61555	3.13736	3.21122	3.32625
Danio_rerio_newGene_12475	1.88339	2.6755	2.12404	2.46135	2.42824	2.63957
Danio_rerio_newGene_12476	1.22162	1.46344	0.960331	0.99832	1.3759	1.58413
Danio_rerio_newGene_12477	0.49492	0.532617	0.499992	0.656356	0.47023	0.59099
Danio_rerio_newGene_12483	0.591146	1.43428	0.910867	1.13932	1.2732	1.96796
Danio_rerio_newGene_12484	1.03309	1.89852	1.24575	1.38541	1.12221	1.81264
Danio_rerio_newGene_12488	1.03302	0.835446	1.20864	1.32677	0.974811	0.72802
Danio_rerio_newGene_12489	1.09079	0.743737	1.11221	1.03451	1.02443	0.672125
Danio_rerio_newGene_12495	0.105865	0.119627	0.016903	0.387907	0.527432	0.48004
Danio_rerio_newGene_12496	0.440528	1.47493	0.505311	2.14276	1.46035	1.08302
Danio_rerio_newGene_125	1.33762	1.44456	1.39907	1.61203	1.85493	1.54502
Danio_rerio_newGene_12502	0.10771	0.68903	0.710293	0.87569	0.768341	0.185894
Danio_rerio_newGene_12503	0.0968615	0.165098	0.466069	0.302157	0.176814	0.112067
Danio_rerio_newGene_12504	0.461168	0.837263	0.683623	0.702539	0.923314	0.518215
Danio_rerio_newGene_12509	0.29217	0.236912	0.395371	0.358719	0.330831	0.410798
Danio_rerio_newGene_12511	0.211311	1.72221	1.28795	2.66156	1.83624	2.15707
Danio_rerio_newGene_12523	6.49733	5.31872	3.84597	4.3148	6.62076	4.63768
Danio_rerio_newGene_12527	0.088032	0.152032	0.418025	0.250225	0.187099	0.17882
Danio_rerio_newGene_12536	14.0028	11.1055	9.84011	7.52077	7.41371	7.32597
Danio_rerio_newGene_12537	0.538865	0.498414	0.535803	0.552906	1.98973	1.11035
Danio_rerio_newGene_1254	0	0.1417	0.198648	0.127297	0.162553	0.113941
Danio_rerio_newGene_12540	9.70202	10.9776	11.9327	12.7367	14.2668	13.8979
Danio_rerio_newGene_12547	1.51845	2.54802	1.88168	2.6566	2.84235	3.40019
Danio_rerio_newGene_12548	2.34133	2.41059	1.9295	1.94722	1.64444	1.86126
Danio_rerio_newGene_12550	0.954886	0.613835	0.859509	0.990072	0.661138	0.833224
Danio_rerio_newGene_12559	1.0276	1.54823	1.26866	1.38701	1.76048	1.86969
Danio_rerio_newGene_1256	0.50022	0.549054	0.335444	0.565708	0.541836	0.552103
Danio_rerio_newGene_12563	1.73708	1.89582	0.932578	0.682775	0.871957	1.18072
Danio_rerio_newGene_12564	0.714321	1.17918	0.541595	0.940402	1.11507	1.38502
Danio_rerio_newGene_12567	1.13564	1.05541	1.21839	1.94344	2.08815	1.65647
Danio_rerio_newGene_1257	0.977863	0.476269	0.848973	1.00663	1.40342	0.776381
Danio_rerio_newGene_12575	0.528181	0.344131	0.519554	0.373933	0.323597	0.352221
Danio_rerio_newGene_12580	2.0334	1.24625	1.45926	1.01187	1.35952	1.1753
Danio_rerio_newGene_12582	0.13042	0.026044	0.118883	0.0355495	0	0.0122165
Danio_rerio_newGene_12587	1.41	1.15724	1.78688	1.31021	1.83872	1.89198
Danio_rerio_newGene_12590	4.19693	4.8053	3.52898	4.2529	4.28911	4.25087
Danio_rerio_newGene_12592	0.299216	0.116853	0.0796755	0.143317	0.0756805	0.060519
Danio_rerio_newGene_12597	2.53531	3.28164	2.27841	3.90019	4.07915	2.55564
Danio_rerio_newGene_126	2.67568	1.4142	1.32781	0.823133	0.897212	0.899445
Danio_rerio_newGene_12601	0.246171	0.163194	0.22155	0.211009	0.326809	0.07428
Danio_rerio_newGene_12604	7.29728	7.80163	6.93572	6.11726	7.20618	8.033
Danio_rerio_newGene_12605	0.890471	0.523003	0.548399	0.716616	0.403947	0.645922
Danio_rerio_newGene_12606	0	0.379115	0.0827405	0.294245	0	0.106235
Danio_rerio_newGene_12607	2.95837	3.35921	2.88618	3.35732	3.22458	3.6734
Danio_rerio_newGene_12608	4.60732	3.40357	4.02062	4.38583	5.22159	4.32482
Danio_rerio_newGene_12621	4.32829	4.99449	4.3758	5.51036	5.65581	6.34788
Danio_rerio_newGene_12622	7.25757	7.62223	6.40899	8.8138	10.0342	9.73333
Danio_rerio_newGene_12623	4.37132	5.15292	4.50217	5.26674	6.85758	6.91038
Danio_rerio_newGene_12627	3.26214	3.25291	3.47101	3.25219	3.61777	3.80054
Danio_rerio_newGene_12632	1.0958	0.991035	0.893626	0.881829	1.17266	1.58145
Danio_rerio_newGene_12637	14.8312	16.4963	19.3165	18.3057	21.1993	20.9071
Danio_rerio_newGene_12638	9.76888	8.31477	5.06414	8.02889	7.81217	8.77042
Danio_rerio_newGene_12641	3.39266	3.26817	3.31974	3.64268	4.52524	4.5929
Danio_rerio_newGene_12642	0.487194	0.27344	0.277286	0.26674	0.398773	0.520132
Danio_rerio_newGene_12643	5.94158	5.99961	3.53319	4.92857	5.79785	7.2184
Danio_rerio_newGene_12644	2.81538	3.12207	4.24561	5.92902	5.7207	6.20284
Danio_rerio_newGene_12646	0.816887	0.5813	0.858811	1.25614	0.71161	0.764764
Danio_rerio_newGene_12653	0.52853	0.304938	0.1863	0.245839	0.337891	0.252773
Danio_rerio_newGene_12657	0.396219	0.248845	0.251161	0.181524	0.535762	0.746326
Danio_rerio_newGene_12659	0.012974	0.165987	0.023974	0.080936	0.151986	0.0956135
Danio_rerio_newGene_12660	5.30886	7.04489	6.68278	4.96789	7.88438	6.85497
Danio_rerio_newGene_12673	0.383675	0.462377	0.248321	0.333058	0.163464	0.140987
Danio_rerio_newGene_12674	1.02644	1.55739	1.34561	0.166781	0.244714	0.691524
Danio_rerio_newGene_12675	2.01256	2.84179	1.65478	2.4489	3.54079	3.36759
Danio_rerio_newGene_12693	0.417359	0.494772	0.432873	0.820605	0.57096	0.304373
Danio_rerio_newGene_12697	1.06955	0.89942	0.493443	0.579164	0.684158	0.848854
Danio_rerio_newGene_12698	0.449684	0.448229	0.168384	0.416404	0.318599	0.36334
Danio_rerio_newGene_12699	0.561645	0.663882	0.583684	0.940568	0.51196	0.465666
Danio_rerio_newGene_12704	3.70559	4.40585	3.39446	4.45465	4.61777	3.70051
Danio_rerio_newGene_12708	0.459393	0.879725	0.420227	0.555822	0.760169	0.766988
Danio_rerio_newGene_12715	0	0.126662	0	0.0950695	0.102586	0
Danio_rerio_newGene_12716	2.54398	1.6741	2.17778	2.88764	2.13888	1.63866
Danio_rerio_newGene_12717	1.56502	1.34232	1.12576	1.11152	1.12075	1.54933
Danio_rerio_newGene_12718	0.513054	0.558141	0.629482	0.867047	0.740752	0.403688
Danio_rerio_newGene_12725	1.2865	1.13529	1.82515	1.21045	1.34855	1.61912
Danio_rerio_newGene_12726	0.179126	0.44147	0.173382	0.600967	0.331909	0.243685
Danio_rerio_newGene_12727	4.44467	4.57477	4.91068	5.12985	5.98626	5.33749
Danio_rerio_newGene_12738	3.10126	4.90427	3.31583	3.94445	4.77806	4.22775
Danio_rerio_newGene_12745	0.209062	0.154231	0.182864	0.07262	0.0897965	0.0851525
Danio_rerio_newGene_1275	0.957904	0.975919	0.733762	1.12826	0.27661	0.884739
Danio_rerio_newGene_12751	0.648158	0.733854	0.417125	0.684334	0.546311	0.735843
Danio_rerio_newGene_12754	2.61551	5.24782	3.29648	2.99328	4.19884	3.30928
Danio_rerio_newGene_12763	0.056794	0.273913	0.193392	0.177782	0.131934	0.288915
Danio_rerio_newGene_12764	1.56782	2.14326	2.01086	1.88916	1.60108	1.60781
Danio_rerio_newGene_12776	1.35047	1.44011	1.13663	1.45626	1.52721	1.1626
Danio_rerio_newGene_12777	3.28591	2.27116	3.36782	3.11702	2.68335	2.70893
Danio_rerio_newGene_12783	0.936588	1.27863	0.907995	0.529914	1.60715	0.513802
Danio_rerio_newGene_12784	0.457936	0.568021	0.124509	0.0786905	0.089901	0.447215
Danio_rerio_newGene_12787	5.88347	8.357	6.03435	4.55547	8.24212	8.11163
Danio_rerio_newGene_12794	4.63228	5.0529	4.18596	4.69967	4.69347	4.99302
Danio_rerio_newGene_12799	0.405274	0.452194	0.372551	0.442117	0.263016	0.495563
Danio_rerio_newGene_1280	1.37143	0.835011	0.606242	0.835422	0.720222	0.882637
Danio_rerio_newGene_12811	0.138436	0.058073	0.249297	0.339665	0.0242795	0.0369785
Danio_rerio_newGene_12818	0.195868	0.263394	0.342734	0.202804	0.164401	0.283766
Danio_rerio_newGene_1282	0.23182	0.472388	0.340355	0.979433	0.422902	0.413844
Danio_rerio_newGene_12828	2.53361	1.26233	2.60334	1.39364	2.34248	1.44952
Danio_rerio_newGene_1283	1.22718	0.559371	0.821736	0.25383	0.74083	1.00761
Danio_rerio_newGene_1284	1.41924	1.50865	1.20406	0.789506	1.03002	0.859209
Danio_rerio_newGene_12843	0.140353	0.261891	0.235142	0.253043	0.167844	0.223584
Danio_rerio_newGene_12847	0.378841	0.301411	0.2925	0.330281	0.33274	0.106117
Danio_rerio_newGene_12848	0.716363	1.35775	0.857889	0.969739	0.880262	0.925959
Danio_rerio_newGene_12856	0.416444	0.400858	0.053951	0.144099	0.372416	0.439473
Danio_rerio_newGene_1286	1.08928	1.59541	1.6785	1.215	1.99399	2.005
Danio_rerio_newGene_12892	0.938878	0.952591	1.11787	1.60509	3.20285	2.49149
Danio_rerio_newGene_12901	0.356573	0.424087	0.642654	0.529964	0.412204	0.311111
Danio_rerio_newGene_12902	0.0392055	0.094781	0.024345	0	0.03346	0.0785035
Danio_rerio_newGene_12910	0.24004	0	0	0.12069	0.20512	0.105233
Danio_rerio_newGene_12914	1.38293	1.84386	1.14468	1.36994	1.56591	1.61945
Danio_rerio_newGene_12916	0.703596	0.665059	0.588487	0.654473	1.12134	1.29215
Danio_rerio_newGene_12917	0.109131	0.219728	0.016061	0.221848	0.232766	0.288195
Danio_rerio_newGene_12918	0	1.41593	1.00863	1.09668	0.580191	0.75076
Danio_rerio_newGene_12953	8.89589	9.442	8.22997	10.1073	7.47954	9.12666
Danio_rerio_newGene_12955	0.570275	0.527757	0.359352	0.72226	0.503912	0.223713
Danio_rerio_newGene_12958	0.0575365	0.1422	0.082255	0.136897	0.129103	0.209132
Danio_rerio_newGene_1296	0.317559	0.072238	0.471176	0.166786	0.409882	0.214662
Danio_rerio_newGene_12960	0.621063	0.89329	0.917323	0.984208	0.693887	0.874018
Danio_rerio_newGene_12964	0.336588	0.174851	0.233634	0.287301	0.215235	0.203912
Danio_rerio_newGene_12972	0.609424	0.898425	0.225025	0.732239	0.835092	0.735085
Danio_rerio_newGene_1298	0.712179	0.438235	0.603548	0.474001	0.599921	0.654627
Danio_rerio_newGene_1299	2.55568	3.19362	2.26386	2.52509	2.73475	3.13763
Danio_rerio_newGene_12995	0.0652855	0.200436	0.28783	0.125709	0.147507	0.238102
Danio_rerio_newGene_12999	0	0	0.403427	0.208265	0.323955	0
Danio_rerio_newGene_13023	15.9867	25.6188	16.9296	25.0194	18.3925	17.8482
Danio_rerio_newGene_13046	0.239469	0.34949	0.456301	0.485501	0.154275	0.33808
Danio_rerio_newGene_13068	4.89541	3.84615	2.18884	2.07661	3.23264	7.83999
Danio_rerio_newGene_1307	0.830625	0.740277	0.495082	0.922513	0.52585	0.631001
Danio_rerio_newGene_13075	1.48754	1.29851	1.04146	1.27553	1.25976	1.50738
Danio_rerio_newGene_13076	0.545699	0.349181	0.404813	0.178309	0.16655	0.342028
Danio_rerio_newGene_13081	0.301613	0.021166	0	0.344139	0.32652	0.0775565
Danio_rerio_newGene_13093	0.219505	0.0834295	0.346855	0.273438	0.302071	0.207143
Danio_rerio_newGene_13097	0.177482	0.0582275	0.22076	0.179689	0.203139	0.296483
Danio_rerio_newGene_13126	1.97423	2.23877	1.27883	2.07427	1.27619	1.65458
Danio_rerio_newGene_13129	0.352027	0.528647	0.0522055	0.604988	0.230544	0.553393
Danio_rerio_newGene_13138	12.9997	15.3421	12.0046	13.8482	12.9836	15.1587
Danio_rerio_newGene_13139	1.30679	0.801829	0.587661	1.23611	0.917932	0.98945
Danio_rerio_newGene_13140	0.133235	0.187718	0.149752	0.224349	0.041475	0.220913
Danio_rerio_newGene_13154	9.90333	13.6167	14.0903	15.7547	16.1579	18.1792
Danio_rerio_newGene_13155	1.84721	2.65617	2.25595	2.6149	3.04307	3.42479
Danio_rerio_newGene_13164	0.61654	0.374501	0.203288	0.313841	0.487797	0.0879305
Danio_rerio_newGene_132	0.155751	0.12603	0.079214	0.127495	0.270765	0.165913
Danio_rerio_newGene_1320	2.18406	2.59698	2.09391	2.88894	2.89237	2.72773
Danio_rerio_newGene_13202	0	0	0	0	0	0
Danio_rerio_newGene_13215	0.777158	2.63333	1.20746	0.67242	1.73055	1.55141
Danio_rerio_newGene_13216	0.186166	0.204633	0.194298	0.266888	0.0623485	0.0195055
Danio_rerio_newGene_13218	1.6833	1.43267	0.955967	1.02168	1.69279	1.40991
Danio_rerio_newGene_13226	0.207535	0.861597	0.110504	0.1134	0.19582	0.254785
Danio_rerio_newGene_1323	1.06565	0.98269	0.949199	0.972329	0.836361	0.920387
Danio_rerio_newGene_13242	10.622	12.331	9.35138	13.1778	15.2295	12.6029
Danio_rerio_newGene_13266	0.123955	0.126029	0.0900995	0.39733	0.249876	0.454247
Danio_rerio_newGene_13271	0	0.144246	0.1361	0.224944	0	0.0601765
Danio_rerio_newGene_13272	0.0420685	0.055632	0.142959	0.0783595	0	0.091626
Danio_rerio_newGene_13277	0.935115	1.45665	0.599932	0.646055	0.357268	1.13105
Danio_rerio_newGene_13289	2.99556	2.49054	1.7072	1.90068	1.71458	2.13843
Danio_rerio_newGene_13312	0.758899	0.855665	0.504698	0.721208	0.249326	0.41311
Danio_rerio_newGene_13313	2.99194	5.18754	1.88955	2.30258	1.56945	1.82316
Danio_rerio_newGene_13315	1.44939	1.53815	1.5066	1.33591	1.17944	0.76819
Danio_rerio_newGene_13326	3.63428	3.15044	2.83008	2.69911	3.01393	2.62371
Danio_rerio_newGene_13330	1.61958	2.06931	1.74934	1.6486	1.37576	1.17519
Danio_rerio_newGene_13332	1.4529	1.90767	1.82082	1.59577	1.79473	1.72783
Danio_rerio_newGene_13341	0.108248	0.300646	0.236439	0.300383	0.364455	0.137147
Danio_rerio_newGene_13350	0.553836	0.885866	0.336167	0.799784	0.917003	0.808248
Danio_rerio_newGene_13354	8.43255	7.0583	6.32644	4.4668	4.44229	3.88374
Danio_rerio_newGene_13356	0.306098	0.467604	0.237205	0.398263	0.279353	0.361333
Danio_rerio_newGene_13359	1.01832	1.57033	0.733414	1.08832	0.498563	0.931283
Danio_rerio_newGene_13365	0	0	0	0.117315	0	0.224936
Danio_rerio_newGene_13375	3.25554	1.61316	1.59638	1.48245	0.977057	1.11558
Danio_rerio_newGene_13377	0.246279	0.136154	0.557211	0.101557	0	0.265707
Danio_rerio_newGene_13392	6.169	6.53063	8.15541	9.50147	9.14485	8.7681
Danio_rerio_newGene_13397	5.73977	5.35751	5.25141	6.35585	6.54957	5.65718
Danio_rerio_newGene_134	2.5023	2.61077	1.81711	1.36224	1.91812	2.59248
Danio_rerio_newGene_13421	1.59629	1.94887	1.69702	1.18545	1.53281	1.45539
Danio_rerio_newGene_13424	1.12577	2.46914	1.56222	1.48655	1.11775	1.51648
Danio_rerio_newGene_13431	0.529309	0.468979	0	0.36405	0.116964	0.254061
Danio_rerio_newGene_13449	0.670122	0.372595	0.303427	0.468183	0.417113	0.463603
Danio_rerio_newGene_13454	3.82101	4.57955	4.33595	3.9456	4.34072	4.99503
Danio_rerio_newGene_13461	5.03404	5.57036	4.52112	4.76546	5.41389	6.82919
Danio_rerio_newGene_13464	277.524	294.042	393.256	318.039	342.958	341.659
Danio_rerio_newGene_13481	0.078286	0.229722	0.088072	0.269981	0.128387	0.393886
Danio_rerio_newGene_13487	0.12938	0.126591	0.308622	0.083431	0	0.334157
Danio_rerio_newGene_13493	0.166733	0.583894	0.168511	0.136436	0.376379	0.278259
Danio_rerio_newGene_13494	0.530401	0.291973	0.713464	0.226542	0.385193	0.414643
Danio_rerio_newGene_13497	0.545292	0.529122	0.404788	0.325693	0.365807	0.353704
Danio_rerio_newGene_13498	2.03162	1.95907	1.47218	1.88968	2.72142	2.67838
Danio_rerio_newGene_13503	0.239208	0.467165	0.363305	0.533457	0.16465	0.212916
Danio_rerio_newGene_13506	0.538212	1.39883	0.441063	0.56824	1.35545	1.7335
Danio_rerio_newGene_13511	0.306847	0.13468	0.631255	0.376743	0.222646	0.384565
Danio_rerio_newGene_13514	0.260615	0.256244	0.609409	0.471856	0.53284	0.320861
Danio_rerio_newGene_13515	0	0.396282	0.395861	0.382354	0.783941	0.737865
Danio_rerio_newGene_13516	0.309153	0.312752	0.180527	0.425227	0.159042	0.269466
Danio_rerio_newGene_13519	0.440323	0.718977	0.243561	0.27664	0.998735	0.801024
Danio_rerio_newGene_13521	0.373565	0.203008	0.178529	0.340598	0.365467	0.153541
Danio_rerio_newGene_13522	0.0888975	0.273502	0.156233	0.350569	0.047277	0.098285
Danio_rerio_newGene_13529	0.123399	0	0.245842	0.43165	0.176652	0.215471
Danio_rerio_newGene_1353	0.584349	0.723819	0.806731	1.11793	1.03885	1.06501
Danio_rerio_newGene_13539	4.10769	2.58825	3.34336	1.44889	1.6356	2.05518
Danio_rerio_newGene_13541	1.05029	0.30659	0.532494	0.502251	0.288567	0.450329
Danio_rerio_newGene_13543	1.91541	1.0432	2.07791	2.54873	0.627142	0.48239
Danio_rerio_newGene_13544	3.49617	3.7087	3.63926	4.77224	4.94545	5.44048
Danio_rerio_newGene_13545	0.404764	0.710597	0.486261	0.307011	0.402166	0.478154
Danio_rerio_newGene_13546	0.0918615	0.501703	0.158944	0.209003	0.637661	0.318729
Danio_rerio_newGene_13547	9.78188	8.64869	5.78666	4.41801	5.71596	6.23154
Danio_rerio_newGene_13548	0.414328	0.92076	0.481784	0.383121	1.65173	0.963549
Danio_rerio_newGene_13556	2.77543	1.87924	2.36992	5.06228	2.63466	2.77627
Danio_rerio_newGene_13557	0.646157	1.4496	0.675072	1.22595	0.785921	0.531676
Danio_rerio_newGene_13561	1.03497	0.93028	0.380107	0.92967	0.780469	0.91244
Danio_rerio_newGene_13565	27.6439	21.055	22.2504	20.9685	22.8823	22.392
Danio_rerio_newGene_13569	3.77882	2.67363	3.13948	1.05501	1.44678	2.10937
Danio_rerio_newGene_13570	15.3688	12.4212	13.6064	8.26272	8.90509	14.6842
Danio_rerio_newGene_13571	5.55012	4.14673	4.34873	2.90009	3.30595	5.47466
Danio_rerio_newGene_13573	0.0438765	0.201894	0.421	0.460207	0.366011	0.0492665
Danio_rerio_newGene_13578	0.380431	0	0.034954	0.223618	0.21175	0.297348
Danio_rerio_newGene_13583	5.61361	4.48467	4.74228	4.00547	2.11801	3.60662
Danio_rerio_newGene_13584	0.531401	0.467335	0.249419	0.219382	0.164692	0.07291
Danio_rerio_newGene_13585	3.74185	2.45226	2.49858	2.21925	1.48897	2.47906
Danio_rerio_newGene_13592	0.35272	0.134531	0.224338	0.029838	0.169903	0.199428
Danio_rerio_newGene_13594	0.146149	0.213748	0.109562	0.161207	0.435976	0.627682
Danio_rerio_newGene_136	4.99898	4.25962	4.57567	4.02788	3.50704	5.18526
Danio_rerio_newGene_13614	1.28119	2.12281	2.381	2.46912	3.31462	2.55725
Danio_rerio_newGene_13617	0.642113	0.523316	0.688441	0.556557	0.239277	0.521374
Danio_rerio_newGene_13618	0	0	0	0	0	0
Danio_rerio_newGene_13619	1.47942	0.659921	0.527124	0.552817	0.414279	0.42783
Danio_rerio_newGene_13622	0.439115	1.16825	0.526024	0.320908	0.341775	0.548569
Danio_rerio_newGene_13623	0.528878	0.284461	0.172547	0.229752	0.019453	0.206231
Danio_rerio_newGene_13629	1.53621	1.56631	0.951069	1.06276	1.10549	1.13007
Danio_rerio_newGene_13631	2.42401	2.24315	3.07127	2.94433	3.02153	2.79072
Danio_rerio_newGene_13639	1.42708	1.22371	1.51526	1.74181	0.937094	1.16953
Danio_rerio_newGene_13642	1.9713	1.83334	1.4109	1.63869	1.55884	1.19831
Danio_rerio_newGene_13643	1.33973	1.83321	1.55654	0.979788	1.44764	1.32321
Danio_rerio_newGene_13655	1.552	0.552712	0.532178	1.44787	0.958255	1.33772
Danio_rerio_newGene_13656	2.0134	2.04311	1.70033	2.17991	1.70619	1.80599
Danio_rerio_newGene_13658	6.32322	5.40955	4.71883	5.59977	4.4976	5.93365
Danio_rerio_newGene_13660	0.26236	0.215956	0.20635	0.297178	0.648724	0.357444
Danio_rerio_newGene_1367	3.44133	3.31095	2.05763	2.65549	2.4463	4.43476
Danio_rerio_newGene_13672	0.610132	0.492695	0.374691	0.315418	0.320026	0.431916
Danio_rerio_newGene_13673	0.575959	0.422346	0.46989	0.468165	0.347898	0.387775
Danio_rerio_newGene_13674	0.526331	0.440969	0.392116	0.329642	0.395827	0.487615
Danio_rerio_newGene_13675	0.0878005	0.1995	0.16318	0.197874	0.184277	0.251298
Danio_rerio_newGene_13679	6.68879	8.87205	7.25685	7.9711	7.69361	7.84573
Danio_rerio_newGene_13686	1.33719	1.88388	0.991493	1.04529	1.21178	1.54817
Danio_rerio_newGene_13693	0.934056	0.871015	0.66081	0.912249	0.695036	0.946298
Danio_rerio_newGene_137	2.8413	2.57496	1.52169	1.87465	2.37651	3.09357
Danio_rerio_newGene_1370	0.983213	1.2057	0.691323	1.07689	1.09344	1.54441
Danio_rerio_newGene_13705	0.018509	0.245481	0.365698	0.369632	0.1457	0.385565
Danio_rerio_newGene_13706	0	0	0	0.0298645	0.397515	0.111418
Danio_rerio_newGene_13708	0.20178	0.0708745	0.0610445	0.165114	0.0649235	0.125397
Danio_rerio_newGene_1372	0.207082	0.05348	0.199917	0	0.305253	0
Danio_rerio_newGene_13726	0.0661625	0.58544	0.128866	0.152879	0.609778	0.315759
Danio_rerio_newGene_13734	1.4785	1.78454	1.66118	1.97421	1.80144	2.0925
Danio_rerio_newGene_1374	0.014949	0	0.0480025	0.247262	0.17334	0.087958
Danio_rerio_newGene_13745	0.664049	0.775136	0.639994	0.780208	0.892199	0.560912
Danio_rerio_newGene_13746	0.19491	0.172176	0.196536	0.155699	0.177446	0.164181
Danio_rerio_newGene_13752	0.281384	0.208149	0.141689	0.280434	0.114997	0.143076
Danio_rerio_newGene_13754	0.0684085	0.196954	0.176557	0.217455	0.13756	0.233098
Danio_rerio_newGene_13757	1.49482	0.867471	1.05803	0.4461	0.616564	0.364147
Danio_rerio_newGene_13758	1.81234	1.36465	1.27084	0.642865	1.23594	1.31759
Danio_rerio_newGene_13759	1.30001	0.588411	0.861723	0.376196	0.457818	0.497587
Danio_rerio_newGene_13765	5.58893	3.54456	4.48608	4.50057	5.29695	3.76552
Danio_rerio_newGene_13766	2.19775	2.13637	2.39959	2.06962	2.14687	2.38942
Danio_rerio_newGene_13769	0	0.038347	0.431968	0.092296	0	0.0476085
Danio_rerio_newGene_13770	0.307914	0.418934	0.390539	0.884396	0.284336	0.355066
Danio_rerio_newGene_13772	0.257732	0.085927	0.0910575	0.058894	0	0
Danio_rerio_newGene_13773	0.13281	0.245144	0	0	0.165155	0.658862
Danio_rerio_newGene_13774	0.242745	0.250815	0.299785	0.433756	0.568609	0.342542
Danio_rerio_newGene_13775	0.839975	0.184727	0.24556	0.150818	0.40418	0.334626
Danio_rerio_newGene_13777	0	0.739444	0	0	0	0
Danio_rerio_newGene_13778	0.325618	0.664468	0	0.314383	0	0.487148
Danio_rerio_newGene_13781	0.0877725	0.0988335	0.326013	0.170023	0	0.247265
Danio_rerio_newGene_13787	2.42395	3.46221	1.45872	1.93348	1.44976	1.14763
Danio_rerio_newGene_13799	0.586359	0.495201	0.396258	0.595176	0.472471	0.622729
Danio_rerio_newGene_1380	13.8236	14.7055	12.1166	13.558	14.1292	12.8357
Danio_rerio_newGene_13803	1.41683	2.12084	2.20619	2.44217	1.76629	1.93456
Danio_rerio_newGene_13806	5.12088	5.72743	5.45852	5.80906	7.99565	7.44485
Danio_rerio_newGene_13813	0.0637475	0.0868	0	0.0993605	0.029592	0.0831745
Danio_rerio_newGene_13823	0.920773	0.63605	0.476824	0.30986	0.57143	0.579489
Danio_rerio_newGene_13824	0.835221	1.44231	1.18197	1.86666	1.44275	1.69955
Danio_rerio_newGene_13826	0.717739	0.700253	0.649142	0.972815	0.675914	1.02428
Danio_rerio_newGene_13827	0.237474	0.17789	0.0814865	0.0298195	0.0323175	0.04105
Danio_rerio_newGene_13838	6.71097	6.49992	9.49478	8.72695	7.68426	7.35405
Danio_rerio_newGene_13842	0.883646	1.04326	0.710592	1.07966	1.37819	0.907535
Danio_rerio_newGene_13843	0.99934	0.823956	1.19909	1.38592	1.40735	0.840506
Danio_rerio_newGene_13846	2.23442	2.925	6.14172	23.1385	22.6733	13.2077
Danio_rerio_newGene_13856	0.273034	0.22704	0.280288	0.448686	0.104767	0.223235
Danio_rerio_newGene_1386	0.124382	0.146288	0.072056	0.125969	0.11107	0.056311
Danio_rerio_newGene_13865	0.160528	0.048463	0.222365	0.126696	0.153371	0.183124
Danio_rerio_newGene_13866	0.090575	0.449738	0.163377	0.228623	0.049573	0.182208
Danio_rerio_newGene_13867	0.370539	0.110135	0.496277	0.447362	0.148091	0.057009
Danio_rerio_newGene_13869	1.82898	1.27788	0.966934	2.1792	1.37471	1.67302
Danio_rerio_newGene_13870	1.78356	1.95979	1.97137	2.70129	2.76749	2.8533
Danio_rerio_newGene_13877	2.7443	1.89508	1.64508	1.43947	0.937118	1.16423
Danio_rerio_newGene_13885	2.3485	2.77444	2.70383	2.92401	2.7393	3.07666
Danio_rerio_newGene_13886	4.46342	6.17463	10.0534	5.37806	8.15527	8.53529
Danio_rerio_newGene_13887	0.188255	0.09106	0.32396	0.508763	0.677694	0.299976
Danio_rerio_newGene_13905	0.914408	1.46357	1.02797	1.17045	1.36678	1.67598
Danio_rerio_newGene_13914	0.590081	0.303797	0.254429	0.372103	0.678205	0.391312
Danio_rerio_newGene_13917	1.96057	2.45324	2.32318	1.44495	1.24204	2.41451
Danio_rerio_newGene_1392	1.39623	1.61919	1.14232	1.5267	1.29076	1.34155
Danio_rerio_newGene_13922	0.153556	1.37964	0.366602	1.35453	1.87955	1.66762
Danio_rerio_newGene_1393	2.07056	1.80007	1.37578	1.64629	1.67327	1.84111
Danio_rerio_newGene_13930	0.0220095	0.224691	0.108678	0.428235	0.313174	0.502621
Danio_rerio_newGene_1395	1.01119	1.92919	1.0778	1.12383	1.4205	1.55407
Danio_rerio_newGene_13959	0	0	0	0	0	0
Danio_rerio_newGene_13960	1.47262	2.42294	2.01296	2.004	1.98984	2.07013
Danio_rerio_newGene_13962	0.130074	0.541448	0.438165	0.481824	0.165317	0.430191
Danio_rerio_newGene_13963	3.34347	3.4905	2.25932	2.63017	3.90088	2.75731
Danio_rerio_newGene_13964	1.05289	1.882	1.68665	1.76532	1.62975	1.32768
Danio_rerio_newGene_13965	1.0127	0.827026	1.18763	1.06144	0.678921	1.03428
Danio_rerio_newGene_13977	1.10326	1.36638	1.03234	1.41499	1.11142	0.914765
Danio_rerio_newGene_14	2.12813	2.95809	2.40385	3.33559	3.10388	3.11095
Danio_rerio_newGene_140	0.382383	0.604448	0.41368	0.446364	0.507559	0.614002
Danio_rerio_newGene_14023	0.57745	0.668449	0.428391	0.272518	0.697645	0.664009
Danio_rerio_newGene_14024	0.186565	0.052735	0.162753	0.0732555	0.207841	0.0641095
Danio_rerio_newGene_14025	1.91316	2.05901	2.13111	1.75188	1.82727	2.56051
Danio_rerio_newGene_1403	0.590458	0.832418	0.787356	0.706702	0.819287	0.709959
Danio_rerio_newGene_14048	0.309144	0.752903	0.495582	0.438163	0.64617	0.574168
Danio_rerio_newGene_14053	0.632002	0.113958	0.196523	0.481773	0.245173	0.470275
Danio_rerio_newGene_14064	0.383272	0.317852	0.239184	0.292445	0.25603	0.294619
Danio_rerio_newGene_14066	0.371906	0.677023	0.201756	0.270462	0.192647	0.16377
Danio_rerio_newGene_14067	0.831482	0.731844	0.45217	0.269497	0.136994	0.224084
Danio_rerio_newGene_14077	4.15003	2.98403	3.56484	3.61976	2.77061	2.45229
Danio_rerio_newGene_1408	8.39347	8.07174	7.9642	6.23071	6.48522	5.76981
Danio_rerio_newGene_14106	0.682395	0.586631	0.165637	0.714353	0.059192	0.308264
Danio_rerio_newGene_14107	0.107909	0.281328	0.105141	0.30003	0.404582	0.333816
Danio_rerio_newGene_14119	0.667053	0.54328	0.466055	0.564086	0.748794	0.420214
Danio_rerio_newGene_14133	0.454948	0.664668	0.476838	0.521076	0.644224	0.761237
Danio_rerio_newGene_14139	0.551517	0.668212	0.559411	0.74077	0.965735	0.619509
Danio_rerio_newGene_14144	1.25693	1.22627	1.35003	1.29392	1.31192	1.10266
Danio_rerio_newGene_14146	1.31753	0.762712	0.887711	0.859344	1.10946	0.758021
Danio_rerio_newGene_14148	1.43849	2.41703	1.47955	1.7892	2.48971	2.55318
Danio_rerio_newGene_14150	5.8646	10.4606	6.44257	6.84238	8.97586	9.11024
Danio_rerio_newGene_14153	4.20118	2.75334	2.42637	2.01559	1.82839	1.81843
Danio_rerio_newGene_14154	1.2008	0.649787	1.13188	0.522428	0.779739	0.562113
Danio_rerio_newGene_14156	0.09856	0.048962	0.07699	0.0620555	0.115843	0.761267
Danio_rerio_newGene_14157	0.652411	0.91581	0.960364	0.791295	0.877911	0.7971
Danio_rerio_newGene_14161	1.16611	0.635916	0.563578	1.03306	0.436505	0.349152
Danio_rerio_newGene_14162	0.3497	0.304979	0.254507	0.256044	0.192321	0.271028
Danio_rerio_newGene_14164	0.321062	0.265872	0.620335	0.418897	0.455106	0.281793
Danio_rerio_newGene_14165	0	0	0	0.223514	0	0.035657
Danio_rerio_newGene_14167	0.520196	0.670534	0.328738	0.220352	0.288007	0.780516
Danio_rerio_newGene_14169	0.745316	0.725484	0.290991	0.387836	0.475899	0.626104
Danio_rerio_newGene_14172	1.2629	2.12565	1.39523	1.53855	1.64338	2.15551
Danio_rerio_newGene_14181	1.59664	1.23752	1.57186	1.09269	1.28525	1.51473
Danio_rerio_newGene_14186	0	0.451466	0.0685535	0.114033	0.098166	0.301663
Danio_rerio_newGene_14193	4.32229	7.73968	3.21281	0.561832	0.084417	0.512068
Danio_rerio_newGene_142	0.0042415	0.239449	0.057948	0.073834	0.180839	0.107114
Danio_rerio_newGene_14200	0.209495	0.367669	0.270643	0.346567	0.342537	0.724589
Danio_rerio_newGene_14224	0.664991	0.336738	0.450395	0.206282	0.450622	0.734462
Danio_rerio_newGene_14235	0.599384	0.0321655	0.030713	0.0260035	0	0
Danio_rerio_newGene_14237	0.179248	0.110245	0.0561445	0.185726	0.151281	0.261362
Danio_rerio_newGene_14241	1.32625	1.77264	1.43496	1.87119	2.28676	1.92228
Danio_rerio_newGene_14250	1.54944	1.71481	0.719882	1.13045	1.0187	1.1874
Danio_rerio_newGene_14269	0	0.388657	0.518138	0	0	0.294991
Danio_rerio_newGene_14279	1.62641	1.37992	1.07109	1.62253	1.28837	1.43546
Danio_rerio_newGene_14284	0.955818	1.56289	0.607271	1.06972	1.01882	1.33093
Danio_rerio_newGene_14288	0.672639	1.00566	1.10521	1.11247	1.05168	1.40387
Danio_rerio_newGene_14299	0.04725	0.0506225	0.032778	0.097032	0.0227625	0
Danio_rerio_newGene_143	1.96826	1.68059	1.35491	1.09864	1.84396	1.31344
Danio_rerio_newGene_14304	0.438111	0.525738	0.440387	0.64009	0.568489	0.603913
Danio_rerio_newGene_14311	0	0	0.228911	0	0	0
Danio_rerio_newGene_14313	0.316262	0	0.219153	0.071224	0.0582485	0.183084
Danio_rerio_newGene_14315	8.14598	4.55637	9.66897	3.01656	3.14255	2.51444
Danio_rerio_newGene_14320	2.72411	4.75148	1.79132	3.84164	6.04534	6.36348
Danio_rerio_newGene_14323	0.670427	0.647436	0.276905	0.937483	1.65186	1.60767
Danio_rerio_newGene_14328	2.89715	3.86904	2.99766	3.98177	4.4204	4.13575
Danio_rerio_newGene_14329	0.038411	0.169628	0.0653895	0	0.127622	0
Danio_rerio_newGene_14342	0.0976085	0.160118	0.033877	0.0878715	0.060943	0.156639
Danio_rerio_newGene_14357	0.0755585	0.358325	0.264454	0.18666	0.343259	0.253794
Danio_rerio_newGene_14360	0.788253	0.741651	0.990987	0.741608	0.83458	0.81786
Danio_rerio_newGene_14367	0.0776235	0.297373	0	0.28915	0.317275	0.477524
Danio_rerio_newGene_14374	0.679772	0.985521	0.876848	0.877081	0.986289	1.06527
Danio_rerio_newGene_14391	0.0743205	0.29762	0	0.241475	0.21294	0.227223
Danio_rerio_newGene_14396	0.069685	0.0319805	0.0166505	0	0.226187	0
Danio_rerio_newGene_14406	1.20479	0.155825	1.24817	0.580326	0.0332155	0.0580055
Danio_rerio_newGene_14410	0.381884	0.447616	0.669358	0.413403	0.523859	0.655738
Danio_rerio_newGene_14411	1.30349	1.30146	1.33444	0.995703	1.24018	1.12797
Danio_rerio_newGene_14427	1.39973	0.713579	0.969707	1.27448	1.29465	0.830427
Danio_rerio_newGene_14447	3.56314	4.69433	3.4247	3.76497	4.01596	4.22824
Danio_rerio_newGene_14460	0.258842	0.414986	0.148023	0.234246	0.189884	0.091489
Danio_rerio_newGene_14476	0.833368	2.03766	1.37777	1.24487	1.50674	2.49555
Danio_rerio_newGene_14480	0.70965	0.266385	0.224452	0.777497	0.381406	0.731533
Danio_rerio_newGene_14500	0.226526	0.624681	0.114023	0.321057	0.363359	0.70096
Danio_rerio_newGene_14504	1.64617	2.6377	2.50286	3.00688	2.6083	1.76228
Danio_rerio_newGene_14510	3.55038	2.41261	2.01938	1.68509	2.93044	1.84302
Danio_rerio_newGene_14520	0.958399	0.806047	2.0035	0.966809	0.647185	0.568779
Danio_rerio_newGene_14523	0.0695445	0.068856	0.264088	0.0923075	0	0.154857
Danio_rerio_newGene_14524	0.0181205	0.235143	0.399693	0.155248	0.087514	0.214271
Danio_rerio_newGene_14529	0.938387	0.96463	0.849209	0.683064	0.936672	0.843317
Danio_rerio_newGene_14532	3.15539	4.15276	1.85321	1.65783	0.897204	1.7839
Danio_rerio_newGene_14543	0.147502	0.111055	0.118818	0.107172	0.105283	0
Danio_rerio_newGene_14549	0.259518	0.254967	0.062111	0.119334	0.0484855	0.270361
Danio_rerio_newGene_14552	0.232514	0	0.0857385	0.112479	0.0994635	0.176753
Danio_rerio_newGene_14561	0.23921	0.602851	0.486098	0.463049	0.370159	0.454645
Danio_rerio_newGene_14566	0.216755	0	0.180262	0.179412	0.0591275	0.271091
Danio_rerio_newGene_14568	1.79261	3.64163	2.25941	2.89201	2.94095	3.38344
Danio_rerio_newGene_14572	1.51638	2.52002	1.62121	1.69723	1.56238	1.79312
Danio_rerio_newGene_14573	2.35915	3.63554	2.17206	2.13679	2.10901	2.43368
Danio_rerio_newGene_14576	12.3821	11.4294	9.49418	9.66155	10.8821	11.6271
Danio_rerio_newGene_14577	0.12783	0.044312	0.0838395	0.019922	0.084278	0.0642615
Danio_rerio_newGene_14580	7.68744	8.62152	9.429	11.2284	9.95367	9.99407
Danio_rerio_newGene_14592	0.456218	1.04854	0.821927	0.935138	0.580731	0.431788
Danio_rerio_newGene_14616	1.55209	2.31034	1.40401	2.74466	2.73144	3.58096
Danio_rerio_newGene_14619	0.527608	0.6903	0.265777	0.260748	0.625532	0.633652
Danio_rerio_newGene_14621	2.66956	4.10897	2.92811	2.40041	2.91019	2.95815
Danio_rerio_newGene_14624	0.873603	0.436034	1.03445	1.23363	0.834681	0.619163
Danio_rerio_newGene_14625	3.08657	2.19061	2.15872	2.10737	2.77728	3.98174
Danio_rerio_newGene_14628	2.38569	1.84766	2.06925	1.82827	2.72397	2.84301
Danio_rerio_newGene_14629	9.57594	8.10737	7.47985	6.53726	7.33237	6.85165
Danio_rerio_newGene_14630	2.93702	3.89515	3.87134	2.77623	5.11099	5.07125
Danio_rerio_newGene_14631	0.836284	0.184389	0.214525	1.16331	0.524642	0.675606
Danio_rerio_newGene_14632	1.76945	1.98672	1.70646	2.01591	2.13571	2.42299
Danio_rerio_newGene_14633	1.86914	3.32627	2.11073	2.9076	3.79656	3.87227
Danio_rerio_newGene_14636	12.5475	13.0614	12.9758	13.6518	10.654	11.3387
Danio_rerio_newGene_14637	0.464416	0.5226	0.573279	0.668049	0.970368	0.835041
Danio_rerio_newGene_1464	1.15794	0.186467	0.108201	0.107852	0.0299455	1.15533
Danio_rerio_newGene_14641	0.378279	0.693537	0.447091	1.24089	1.06711	0.619154
Danio_rerio_newGene_14643	0.362603	0.905072	0.526396	0.373247	0.320979	1.36037
Danio_rerio_newGene_14644	4.2033	6.4308	4.28427	9.45799	2.86236	9.75159
Danio_rerio_newGene_14645	0.664195	1.10953	1.0092	2.06228	2.19174	1.99558
Danio_rerio_newGene_14649	0	0.116433	0	0	0	0
Danio_rerio_newGene_14651	1.82954	1.91197	1.3913	1.99255	2.00085	2.07153
Danio_rerio_newGene_14652	1.68608	1.5418	1.31178	2.30442	1.90022	2.00622
Danio_rerio_newGene_14653	0.22365	0.04086	0.263757	0.153358	0.066497	0.728866
Danio_rerio_newGene_1466	0	0.179893	0	0.267308	0	0
Danio_rerio_newGene_14668	0.830415	1.55458	0.803346	1.29403	1.38815	1.73666
Danio_rerio_newGene_14681	1.48962	1.40114	0.698031	1.42727	1.28522	2.56044
Danio_rerio_newGene_14687	8.3969	10.7924	11.5078	14.5433	12.4173	16.522
Danio_rerio_newGene_14692	26.4703	21.295	22.6974	22.2033	23.1387	16.4148
Danio_rerio_newGene_14693	0.371806	0.512738	0.191008	0.448226	0.203991	0.704819
Danio_rerio_newGene_14698	3.65795	2.53498	4.32875	3.1344	2.49155	2.66376
Danio_rerio_newGene_14712	2.13185	2.84113	2.2293	2.44105	2.11153	2.89065
Danio_rerio_newGene_14718	8.9368	9.32816	10.5385	10.5233	12.1968	12.3461
Danio_rerio_newGene_14721	7.51138	7.10364	9.87103	8.76193	8.47405	7.35007
Danio_rerio_newGene_14723	1.53671	3.1473	2.35787	1.6114	2.48645	2.37351
Danio_rerio_newGene_14726	9.0054	12.0972	8.49695	10.0011	10.7323	11.4778
Danio_rerio_newGene_14727	1.00956	1.06486	1.44286	1.1312	1.30457	1.07649
Danio_rerio_newGene_14733	1.36719	1.07092	1.00064	0.618035	0.973851	1.23351
Danio_rerio_newGene_14735	2.02561	2.60852	2.28709	2.2357	2.8541	2.9451
Danio_rerio_newGene_14742	0.476036	0.550272	0.363749	0.707178	0.882613	0.70255
Danio_rerio_newGene_14752	0.057739	0.144297	0.120275	0.167087	0.105013	0.0819005
Danio_rerio_newGene_14756	4.06861	2.92218	4.99867	6.06856	3.80784	3.91112
Danio_rerio_newGene_14757	10.0761	12.7239	8.74487	9.67647	12.6094	10.0061
Danio_rerio_newGene_14759	6.57387	4.82165	4.65403	5.12363	4.61599	4.92205
Danio_rerio_newGene_14776	0	0.285319	0	0.112834	0.229398	0.0658955
Danio_rerio_newGene_14779	0.55735	0.548933	0.777997	0.48004	0.196072	0.283287
Danio_rerio_newGene_14794	5.6811	5.12151	5.54394	4.88721	6.07746	5.363
Danio_rerio_newGene_14802	2.9827	1.60457	1.12547	0.633321	0.543123	1.25456
Danio_rerio_newGene_14805	0.101694	0.246464	0.399793	0.777948	0.712074	0.851127
Danio_rerio_newGene_14811	0.690489	1.35764	1.25409	2.6489	1.32011	2.7096
Danio_rerio_newGene_14828	2.06794	2.0125	1.77436	2.3236	2.44762	2.42017
Danio_rerio_newGene_14835	0.915125	1.09063	1.08945	1.2719	1.10075	1.34687
Danio_rerio_newGene_14839	0.038024	0.0574285	0.0451395	0.31275	0.172781	0.197955
Danio_rerio_newGene_14856	0.918045	0.854499	2.02794	2.0899	1.00864	1.07447
Danio_rerio_newGene_14861	2.73899	5.04372	3.80509	4.29	5.10963	4.91699
Danio_rerio_newGene_14863	1.72777	3.10241	2.10311	5.3143	4.40333	5.8511
Danio_rerio_newGene_14866	0.519022	0.503371	0.484388	0.710906	1.04072	0.748741
Danio_rerio_newGene_14868	0.245479	0.507556	0.106704	0.352364	0.438432	0.628927
Danio_rerio_newGene_1487	0.34726	0.051493	0	0.20147	0	0.116393
Danio_rerio_newGene_14878	2.28488	3.29481	5.44177	6.46598	6.90939	7.31863
Danio_rerio_newGene_14883	0.893599	1.05117	0.985834	0.891404	1.12609	1.35961
Danio_rerio_newGene_14884	0.469425	0.408327	0.575886	0.936697	0.332456	0.696777
Danio_rerio_newGene_14886	0	0.138039	0.0691115	0.129882	0	0.270146
Danio_rerio_newGene_14887	0.31191	0.524914	0.183899	0.218407	0.171869	0.198933
Danio_rerio_newGene_14892	15.9678	14.0995	15.1337	13.7226	13.5244	13.1548
Danio_rerio_newGene_14893	2.54531	4.04235	5.41331	6.67059	6.03612	9.11673
Danio_rerio_newGene_14895	0.036262	0.417543	0	1.00323	0	0.316615
Danio_rerio_newGene_14897	0.601306	0.520084	1.396	0.622259	0.907755	1.12569
Danio_rerio_newGene_14913	0.47054	0.345877	0.313478	0.777342	0.379026	0.465218
Danio_rerio_newGene_14917	1.45861	1.35535	1.15932	0.799971	1.4227	1.20145
Danio_rerio_newGene_14922	0.112867	0.0964385	0	0.0647865	0.121934	0.0486245
Danio_rerio_newGene_14928	2.3312	2.45948	2.58002	1.95243	1.70034	1.75354
Danio_rerio_newGene_14936	0.0510395	0.132296	0.0374515	0.027227	0.0873175	0.0466795
Danio_rerio_newGene_14937	0.527212	0.206276	0.305458	0.170281	0.59618	0.233125
Danio_rerio_newGene_1494	1.51892	2.00216	1.4216	1.1201	1.58938	1.21613
Danio_rerio_newGene_14947	1.12392	1.65616	1.34515	1.94287	1.1774	1.71317
Danio_rerio_newGene_14951	0.260603	0.970177	1.09429	1.34247	1.44101	0.707107
Danio_rerio_newGene_14974	1.38965	2.67274	2.76575	3.23967	1.94103	2.26924
Danio_rerio_newGene_14976	0.584035	0.867834	0.677347	0.721913	0.828781	0.631102
Danio_rerio_newGene_14980	1.45541	1.69268	1.41028	1.41637	1.18149	1.36729
Danio_rerio_newGene_14983	0.390115	0.498972	0.04368	0.342615	0.138432	0.096449
Danio_rerio_newGene_14996	0.0405155	0	0.484367	0.030378	0.0512365	0.16062
Danio_rerio_newGene_14998	0.863768	1.30616	1.4205	2.54092	1.78652	1.78688
Danio_rerio_newGene_15000	1.68	1.6755	2.55309	3.58892	2.82693	3.25197
Danio_rerio_newGene_15003	0.713375	0.686419	0.409853	0.612073	0.811141	1.21833
Danio_rerio_newGene_15007	0.538529	0.459055	0.792667	0.641447	1.06317	0.935283
Danio_rerio_newGene_15008	0.386459	0.54791	0.563183	0.483488	0.578157	0.493499
Danio_rerio_newGene_15015	0.379554	0.36546	0.124724	0.358642	0.283523	0.470894
Danio_rerio_newGene_15018	0.352039	0.084984	0.200755	0.182268	0.099982	0.228961
Danio_rerio_newGene_15019	1.03066	0.924824	0.873268	1.27078	1.14331	1.27846
Danio_rerio_newGene_1503	0.20019	0.595664	0.553084	0.364351	0	0.880881
Danio_rerio_newGene_15036	0.259545	0.279	0.230664	0.185193	0.247434	0.316499
Danio_rerio_newGene_15057	0.300564	0.487001	0.606437	1.19849	0.757339	0.70658
Danio_rerio_newGene_15059	0.227469	0.0424725	0	0.105877	0.155661	0.308256
Danio_rerio_newGene_15066	0	0.056804	0.0603465	0	0	0.143599
Danio_rerio_newGene_1507	0.175227	0.362628	0.0314285	0.55855	0.262084	0.050833
Danio_rerio_newGene_15074	0.361404	0.151949	0.0332635	0.175833	0.10245	0
Danio_rerio_newGene_15075	3.7532	3.55399	1.96542	2.26896	3.70072	2.77539
Danio_rerio_newGene_15079	0.376196	0.559133	0.450004	1.13304	0.614295	1.2742
Danio_rerio_newGene_15096	0.232019	0.381202	0.214227	0.47638	0.384455	0.460689
Danio_rerio_newGene_15099	0	0	0.207593	0	0.040661	0
Danio_rerio_newGene_15101	0.199524	0.380275	0.232898	0.265663	0.212902	0.372505
Danio_rerio_newGene_15103	0.0626105	0.0163825	0.29254	0.07241	0.193598	0.109218
Danio_rerio_newGene_15104	0.233594	0.110815	0.131425	0.087008	0.278371	0.128159
Danio_rerio_newGene_15106	0.298434	0.180519	0.283711	0.293031	0.293527	0.41311
Danio_rerio_newGene_15116	2.17994	4.90887	0.625854	0.803268	4.05372	4.81979
Danio_rerio_newGene_15118	0.249422	0.228184	0.224523	0.112086	0.114916	0.038188
Danio_rerio_newGene_15119	0.299647	0.707099	0.396006	0.800438	0.438497	0.393708
Danio_rerio_newGene_15123	0.409516	1.18532	0.572181	0.95797	1.18956	1.05642
Danio_rerio_newGene_15131	0.431561	0.45835	0.81351	0.505165	0.391535	0.617532
Danio_rerio_newGene_15159	28.3605	31.0524	24.3082	27.2346	32.6391	34.6229
Danio_rerio_newGene_15177	0.260669	0.0650865	0	0.053129	0.063381	0.0528325
Danio_rerio_newGene_15180	0.216903	0.376374	0.115085	0.346446	0.309489	0.459059
Danio_rerio_newGene_1519	0.163827	0.387126	0.064547	0.84908	0.0869545	0.0716675
Danio_rerio_newGene_15212	0	0.147035	0	0	0.024116	0
Danio_rerio_newGene_15215	0.426921	0.235876	0.25435	0.142621	0.183878	0.25076
Danio_rerio_newGene_15218	2.37735	1.42755	2.55648	2.86321	1.2602	1.08617
Danio_rerio_newGene_15236	1.70885	1.6274	1.51088	1.49023	1.59428	1.32699
Danio_rerio_newGene_15237	0.493751	1.0791	0.484152	0.634995	0.929306	0.724021
Danio_rerio_newGene_15244	0.513838	0.447712	0.438447	0.761912	0.61516	0.498153
Danio_rerio_newGene_15247	0.460618	0.459405	0.785186	0.669825	0.257398	0.799686
Danio_rerio_newGene_15249	0.617873	0.786133	0.561731	0.78257	1.04977	0.918896
Danio_rerio_newGene_15251	0.409587	0.373353	0.41382	0.416762	0.187086	0.230832
Danio_rerio_newGene_15259	0.204465	0.0140535	0.220997	0.175416	0.15961	0.222444
Danio_rerio_newGene_15262	0.108609	0.610406	0.11686	0.727741	0.461032	0.139183
Danio_rerio_newGene_15263	0.240378	1.48869	0.687146	1.70144	0.50932	0.380518
Danio_rerio_newGene_15264	0.134912	0.246258	0.0254085	0.277485	0.138846	0.237023
Danio_rerio_newGene_15266	0.0196065	0.0329925	0.058633	0.272245	0.0454015	0
Danio_rerio_newGene_15269	0.15224	0.421188	0.720772	0.025812	0.22033	0.19031
Danio_rerio_newGene_15277	0.265107	0.609063	1.34758	1.26315	0.50449	0
Danio_rerio_newGene_15281	0.121902	0.181173	0	0	0	0
Danio_rerio_newGene_15293	0.735328	0.755221	0.784049	0.627161	0.344921	0.329314
Danio_rerio_newGene_15295	0.229648	0.269202	0.0808355	0.198574	0.233183	0.141184
Danio_rerio_newGene_15317	0.581603	0.367096	0.687806	0.332947	0.248049	0.31819
Danio_rerio_newGene_15320	0	0	0	0	0	0
Danio_rerio_newGene_15322	0.492783	0.211074	0.525483	0.411504	0.424048	0.601376
Danio_rerio_newGene_15323	0.0589745	0.570153	0	0.168252	0.258123	0.458851
Danio_rerio_newGene_15324	0.190848	0.17708	0.226926	0.296602	0.117475	0.170566
Danio_rerio_newGene_15328	0.084592	0.221352	0.136101	0.389387	0.308474	0.345645
Danio_rerio_newGene_15330	0.368353	0.461786	0.54305	0.283079	0.350051	0.419542
Danio_rerio_newGene_15331	0.303827	0.452653	0.474018	0.400559	0.336372	0.190472
Danio_rerio_newGene_15332	0.880536	0.526729	0.944576	0.177525	0.306963	0.323195
Danio_rerio_newGene_15334	0.621296	0.688671	0.727174	0.608448	0.234061	0.335264
Danio_rerio_newGene_15344	0.502166	0.537089	0.174632	0.488911	0.149601	0.187673
Danio_rerio_newGene_15345	0.864275	0.37102	0.725502	0.439931	0.362733	0.136812
Danio_rerio_newGene_15346	0.375444	0.261715	0.786575	0.374955	0.371286	0.223858
Danio_rerio_newGene_15347	0.228957	0.440763	0.423805	0.502045	0.323443	0.153286
Danio_rerio_newGene_15348	0.235925	0	0.136463	0	0	0
Danio_rerio_newGene_15349	0.358542	0.324804	0.311588	0.189563	0.150695	0.0263975
Danio_rerio_newGene_15355	0.221856	0	0.252072	0.035307	0.0651365	0.029182
Danio_rerio_newGene_15359	1.6051	1.2602	1.77517	1.08873	0.967386	0.770161
Danio_rerio_newGene_15367	0	0.008632	0.024535	0	0	0
Danio_rerio_newGene_15370	2.27849	4.10559	2.39943	3.26022	0.0434675	2.70233
Danio_rerio_newGene_15379	0.051949	0	0.027491	0.196678	0.0318965	0.22456
Danio_rerio_newGene_15381	0.540836	0.450955	0.589164	0.390215	0.271234	0.359386
Danio_rerio_newGene_15385	0.35654	0.23159	0.300109	0.076532	0.452973	0.207289
Danio_rerio_newGene_15386	0.322376	0.403376	0.575975	0.399761	0.155616	0.139991
Danio_rerio_newGene_15401	0.381873	0.982125	0.698204	0.925155	0.740654	1.0075
Danio_rerio_newGene_15404	4.36042	1.84898	3.49685	1.87998	1.22341	1.8539
Danio_rerio_newGene_15406	0.274182	0.614976	0.0147435	0.14368	0.38897	0.392239
Danio_rerio_newGene_15413	0.299863	0.908097	0.085355	0.469829	0.541585	0.414255
Danio_rerio_newGene_15417	0.402752	0.477479	0.62237	0.475877	0.152071	0.311103
Danio_rerio_newGene_15419	0.141029	0.265668	0.148461	0.357016	0.37758	0.177981
Danio_rerio_newGene_15423	0.101917	0.196524	0	0.470311	0.454757	0
Danio_rerio_newGene_15427	0.241861	0.054674	0.348631	0.248829	0	0.128252
Danio_rerio_newGene_15429	1.22462	1.03787	0.749122	0.593641	0.583584	1.09091
Danio_rerio_newGene_15430	1.03621	1.24472	0.944708	1.12906	0.811699	0.967793
Danio_rerio_newGene_15431	0.143168	0	0	0.0226665	0	0
Danio_rerio_newGene_15434	0	0	0.064287	0.110423	0	0
Danio_rerio_newGene_15436	0.114328	0.23831	0.18615	0.384205	0.206409	0.266712
Danio_rerio_newGene_15437	0	0.031687	0.043901	0.0306675	0.031312	0.0718125
Danio_rerio_newGene_15440	0	0	0	0.035531	0	0
Danio_rerio_newGene_15443	0.769832	0.692006	0.750812	0.200524	0.212231	0.374399
Danio_rerio_newGene_15445	0.279693	0.510093	0.654345	0.132765	0.214436	0.222058
Danio_rerio_newGene_15446	0.529999	0.210053	0.333612	0.279896	0.163083	0.306012
Danio_rerio_newGene_15448	0.0664965	0.041861	0.271537	0.0124775	0.046479	0
Danio_rerio_newGene_1545	1.25932	1.73463	1.25058	1.633	1.6809	1.4521
Danio_rerio_newGene_15451	0.34151	0.706168	0.372254	0.414516	0.551609	0.064563
Danio_rerio_newGene_15453	0.179507	0.297136	0.303188	0.229945	0.229367	0.426183
Danio_rerio_newGene_15456	0.618795	0.776811	0.511321	1.05574	0.801133	0.676654
Danio_rerio_newGene_15457	0.419175	0.473993	0.207175	0.210664	0.26882	0
Danio_rerio_newGene_15461	0.42166	0.220266	0.322613	0.0558615	0.124318	0.134935
Danio_rerio_newGene_15462	0.796046	0.555434	0.630759	0.468741	0.424557	0.399062
Danio_rerio_newGene_15463	0.205809	0.218732	0.493872	0.087405	0.152495	0.617686
Danio_rerio_newGene_15467	2.48189	3.13836	1.66014	2.69214	3.13886	3.49662
Danio_rerio_newGene_15478	0.716783	1.31751	0.942225	0.738982	1.0661	1.02719
Danio_rerio_newGene_15479	1.02331	0.54217	0.604487	0.479343	0.406274	0.376615
Danio_rerio_newGene_15482	1.64447	1.43505	0.786364	0.935018	1.17679	1.1917
Danio_rerio_newGene_15484	1.61085	1.05223	1.08437	0.762993	0.783351	0.802581
Danio_rerio_newGene_15491	4.17509	4.23561	3.3931	2.72878	3.01119	3.44394
Danio_rerio_newGene_15495	0.6551	0.43237	0.230156	0.263616	0.194409	0.139836
Danio_rerio_newGene_15497	0.796724	1.83572	1.01652	1.78558	1.49228	1.36452
Danio_rerio_newGene_15498	2.19961	1.61062	1.11247	1.3147	1.49997	1.56832
Danio_rerio_newGene_15500	0.506516	0.513019	0.541902	0.656447	0.628014	0.643942
Danio_rerio_newGene_15502	0.515273	0.280581	0.695422	0.366254	0.68019	1.08915
Danio_rerio_newGene_15504	0.444758	0.338842	0.713499	0.76206	0.318889	0.117334
Danio_rerio_newGene_15506	0.024111	0	0	0.076504	0	0.495358
Danio_rerio_newGene_15508	0.529307	0.220304	0.166105	0.282647	0.0440625	0.1292
Danio_rerio_newGene_15527	0.191879	0.459191	0.152548	0.931458	0.978983	0.382278
Danio_rerio_newGene_15531	0.117443	0.277309	0.086137	0.289762	0.2479	0.0928645
Danio_rerio_newGene_15533	0.056754	0	0.121714	0.028758	0	0.0274325
Danio_rerio_newGene_15534	0.21488	0.401573	0.236007	0.114325	0.028679	0.277535
Danio_rerio_newGene_15554	1.00297	2.13931	1.55499	1.64908	2.68432	2.95227
Danio_rerio_newGene_15555	1.37865	0.764676	1.49274	0.680134	0.674482	0.771195
Danio_rerio_newGene_15557	1.40415	1.94362	1.64919	1.52029	1.77555	1.72515
Danio_rerio_newGene_15560	0.892844	0.609912	0.837292	0.378896	0.288246	0.526971
Danio_rerio_newGene_15561	2.09734	3.58961	2.88309	0.938317	3.36956	2.85232
Danio_rerio_newGene_15567	0.23755	0.19551	0.133334	0.577162	0.13326	0.144377
Danio_rerio_newGene_15574	0.434783	0.376553	0.374559	0.210715	0.25125	0.324409
Danio_rerio_newGene_15576	0.212888	0.468595	0.082945	0.565854	0.724352	0.439985
Danio_rerio_newGene_1558	0	0.256566	0.271107	0.381759	0.307339	0.307641
Danio_rerio_newGene_15580	0.387189	1.28888	0.345548	0.684974	0.591238	0.733629
Danio_rerio_newGene_15581	0.0226185	0.180436	0.034133	0.45178	0.0091375	0
Danio_rerio_newGene_15582	0.032934	0.3209	0.211871	0.343852	0.242831	0.344823
Danio_rerio_newGene_15595	9.87775	9.27141	9.86697	10.9604	10.429	10.2721
Danio_rerio_newGene_15597	2.52879	2.69946	2.58953	3.27342	2.92452	2.70322
Danio_rerio_newGene_15598	0.245897	0.114823	0.0396795	0.035871	0.0900225	0.193626
Danio_rerio_newGene_15599	1.09164	1.4759	1.68778	2.06416	1.70632	1.73811
Danio_rerio_newGene_15600	1.8167	2.12332	1.93608	1.55928	1.7289	1.64425
Danio_rerio_newGene_15601	1.69822	1.72625	1.67707	1.94103	1.62594	2.12015
Danio_rerio_newGene_15602	0.0639815	0.198481	0	0.0271905	0.346525	0.120032
Danio_rerio_newGene_15605	0.733105	0.800121	0.413557	0.078465	0.741131	0.596548
Danio_rerio_newGene_15607	0.576699	0.849279	0.693473	0.795252	0.574968	0.857293
Danio_rerio_newGene_15608	1.9898	1.71738	1.69067	1.60475	1.65627	2.69617
Danio_rerio_newGene_15609	3.63053	3.59525	3.47904	3.52296	6.12332	4.4901
Danio_rerio_newGene_15610	0.593406	0.706475	0.433543	0.56045	0.492942	0.497945
Danio_rerio_newGene_15611	0.391858	0.942352	0.490577	0.580537	1.20694	1.57159
Danio_rerio_newGene_15612	1.09313	1.54456	0.860587	1.12343	1.03352	1.04607
Danio_rerio_newGene_15614	0.092051	0.12223	0.072959	0.011502	0.0821815	0.0431925
Danio_rerio_newGene_15615	1.643	1.50884	1.70266	1.41743	1.79172	2.12751
Danio_rerio_newGene_15617	0.488377	0.677674	0.27252	0.21756	0.581908	0.253194
Danio_rerio_newGene_15618	0.448821	0.740247	0.373575	0.438513	0.429759	0.545238
Danio_rerio_newGene_15623	0.236514	0.165045	0.188196	0.315926	0.32743	0.256111
Danio_rerio_newGene_15624	0	0	0	0.260285	0	0
Danio_rerio_newGene_15636	0.61041	0.83282	0.506136	1.08956	0.980168	0.917221
Danio_rerio_newGene_15638	0.544749	1.05275	0.677759	0.762849	1.04489	1.13981
Danio_rerio_newGene_15639	1.45663	2.59787	1.24658	1.24212	1.79667	2.07301
Danio_rerio_newGene_15646	2.08146	2.57074	1.76933	2.97009	2.69757	3.31501
Danio_rerio_newGene_15647	0.270807	0.428485	0.260879	0.145489	0.421529	0.080548
Danio_rerio_newGene_15649	1.01792	0.428544	1.18949	1.36763	0.602921	1.15664
Danio_rerio_newGene_15650	1.78137	1.3183	1.41359	1.28128	2.78542	3.27551
Danio_rerio_newGene_15654	2.31306	2.72633	2.30794	1.30721	1.8873	1.79461
Danio_rerio_newGene_15657	0.693264	1.30418	0.94948	0.807291	0.846936	0.989699
Danio_rerio_newGene_15659	0.115196	0.0637175	0	0.182338	0.0185045	0.252184
Danio_rerio_newGene_15660	3.44945	3.13737	2.27091	3.05451	3.05892	3.39315
Danio_rerio_newGene_15661	0.233703	0.411556	0.267143	0.541506	0.561228	1.06027
Danio_rerio_newGene_15663	0.0880495	0.284262	0.367757	0.139369	0.45737	0.118836
Danio_rerio_newGene_15665	1.2021	3.51938	1.96208	3.00514	2.32318	2.82355
Danio_rerio_newGene_15669	4.43327	4.1751	3.49344	1.13186	1.55843	1.99186
Danio_rerio_newGene_15672	0.24877	0.427078	0.189201	0.454981	0.205173	0.412618
Danio_rerio_newGene_15695	0.347235	1.16248	0.291029	0.970417	0.960347	0.45283
Danio_rerio_newGene_1570	1.75277	1.36157	1.34483	1.15508	2.48639	2.17277
Danio_rerio_newGene_15709	0	0.21013	0	0	0	0.293532
Danio_rerio_newGene_15737	0.929782	1.05428	1.01737	0.388074	0.572745	0.53365
Danio_rerio_newGene_15739	0.478663	0.519428	0.638721	0.434648	0.477199	0.464028
Danio_rerio_newGene_15744	2.81219	2.5425	1.34011	1.72794	2.38532	2.67735
Danio_rerio_newGene_15746	6.95039	11.9116	8.24126	12.9746	4.93359	4.52738
Danio_rerio_newGene_15747	1.1121	6.10368	5.43806	7.00316	5.35162	4.85697
Danio_rerio_newGene_15748	0.711428	0.738687	0.586231	0.609207	0.530835	0.505915
Danio_rerio_newGene_15749	3.36171	4.72046	4.40049	4.0041	4.48847	5.00288
Danio_rerio_newGene_15753	0.589519	0.556967	0.474125	0.561311	0.477872	0.525134
Danio_rerio_newGene_15756	0.173497	0.282981	0.244999	0.46434	0.491474	0.520191
Danio_rerio_newGene_15769	6.28244	5.99176	5.14761	5.5409	6.53698	5.76774
Danio_rerio_newGene_15779	7.74545	7.68115	9.44433	7.44345	8.30225	10.3236
Danio_rerio_newGene_15781	1.40606	1.28422	1.13555	1.20175	1.06332	1.53803
Danio_rerio_newGene_15782	3.04122	4.0805	2.60653	3.14819	3.26404	3.69692
Danio_rerio_newGene_15783	2.46735	2.7983	2.50436	3.26119	3.12697	3.39767
Danio_rerio_newGene_15788	0.525584	0.670765	0.741796	0.730862	0.750377	0.898879
Danio_rerio_newGene_1579	0.0226115	0.200778	0.113773	0	0.0285945	0.182922
Danio_rerio_newGene_15796	0.732845	0.556902	0.669748	0.948409	0.774043	1.02451
Danio_rerio_newGene_15806	0.58095	1.40079	1.38898	0.929504	1.78665	0.926418
Danio_rerio_newGene_15807	15.9943	8.76036	12.5212	1.93275	12.7375	9.12117
Danio_rerio_newGene_15809	14.4545	23.5756	19.4707	23.5583	22.337	20.7939
Danio_rerio_newGene_15817	5.29752	5.50286	5.05828	5.04634	6.24607	6.97776
Danio_rerio_newGene_15824	1.34317	1.7694	1.65271	1.74482	1.90344	1.69978
Danio_rerio_newGene_15827	1.85261	1.82607	1.90386	1.9559	2.61035	2.88127
Danio_rerio_newGene_15830	1.65414	2.00521	1.79599	1.59152	2.18109	2.40841
Danio_rerio_newGene_15834	1.08235	1.48597	1.40979	1.2566	1.29277	1.27965
Danio_rerio_newGene_15838	2.5963	3.13534	2.35377	2.60147	2.71765	3.34979
Danio_rerio_newGene_15855	0.96092	1.43731	1.23386	1.15183	1.05154	1.6435
Danio_rerio_newGene_15858	1.68483	2.48366	1.91758	1.85292	2.07414	2.37177
Danio_rerio_newGene_15870	1.88136	1.84636	2.2711	1.60776	1.74935	2.21971
Danio_rerio_newGene_15879	0.632476	0.945228	0.570526	0.879147	0.638586	0.702586
Danio_rerio_newGene_15880	1.64179	3.30274	2.71541	2.2341	2.43444	2.75606
Danio_rerio_newGene_15881	0.357298	0.49454	0.114721	0.44497	0.250506	0.75249
Danio_rerio_newGene_15884	1.54362	1.64931	1.59373	1.56934	1.33268	1.21924
Danio_rerio_newGene_15885	2.66326	2.68465	2.83752	2.89182	2.49895	3.18628
Danio_rerio_newGene_15889	0.797324	0.333202	0.663459	0.239899	0.0789305	0.141439
Danio_rerio_newGene_15892	0.318113	0.0888175	0.266459	0.149197	0	0
Danio_rerio_newGene_15893	0.442111	0.811432	0.477765	0.523975	0.819862	0.632413
Danio_rerio_newGene_15896	0.972301	0.508754	0.446754	0.492868	0.463809	0.295088
Danio_rerio_newGene_15897	1.49747	1.02128	2.05013	2.18909	1.12282	0.755236
Danio_rerio_newGene_15898	0.281577	0.701899	0.033536	0.352509	0.027202	0.0601825
Danio_rerio_newGene_15901	0.194728	0.652863	0.372326	1.02682	0.500456	0.835101
Danio_rerio_newGene_15902	11.7701	10.4058	9.34815	7.55307	7.8174	12.384
Danio_rerio_newGene_15903	0.961395	0.871981	1.07413	1.00172	0.872803	0.973577
Danio_rerio_newGene_15905	0.293239	0.353936	0.163959	0.407042	0.785397	0.379979
Danio_rerio_newGene_15907	0.181916	0.189206	0.36505	0.378721	0.191856	0.170052
Danio_rerio_newGene_15908	0.051804	0.0917975	0.175543	0.182856	0.261626	0.100146
Danio_rerio_newGene_15915	0.678337	0.476555	0.501925	0.11034	0.138935	0.632411
Danio_rerio_newGene_15921	101.886	85.3512	94.2877	102.092	66.7125	99.1106
Danio_rerio_newGene_15925	2.16489	3.36422	2.00405	2.72952	3.51529	3.67187
Danio_rerio_newGene_15929	0.159479	0.157971	0.116495	0.110266	0.0554085	0.268467
Danio_rerio_newGene_15934	0.937864	1.13825	1.13366	0.935504	1.22434	1.44893
Danio_rerio_newGene_15935	1.4684	2.31242	1.49517	2.02902	1.98258	2.33
Danio_rerio_newGene_15946	0.171717	0.197587	0.151867	0.161006	0.343952	0.310538
Danio_rerio_newGene_15966	4.66917	6.72144	4.33939	5.88653	5.97895	5.32977
Danio_rerio_newGene_15975	1.04212	0.968241	1.41348	1.82921	1.47853	1.63742
Danio_rerio_newGene_16023	0	0	0	0.0651195	0	0
Danio_rerio_newGene_16025	2.44909	2.04819	2.37634	1.77718	2.61653	2.55216
Danio_rerio_newGene_16045	5.03921	6.04907	4.17413	4.87751	5.5134	7.17736
Danio_rerio_newGene_16055	6.63691	9.70948	13.6984	16.9983	19.2523	17.5223
Danio_rerio_newGene_16060	9.05266	12.6872	15.5236	21.182	27.1323	20.7276
Danio_rerio_newGene_16066	0.868789	0.648012	0.3849	0.689198	0.991763	0.768765
Danio_rerio_newGene_16071	3.29392	3.54491	3.53167	2.6314	2.00027	2.38235
Danio_rerio_newGene_16103	0.51965	0.176368	0.174826	0.29127	0.194914	0.0953235
Danio_rerio_newGene_16104	2.66585	2.74239	2.28309	1.408	1.94014	2.67733
Danio_rerio_newGene_16112	6.82969	8.66173	6.66676	9.2004	8.66795	9.84576
Danio_rerio_newGene_16115	0	0.226565	0	0.031441	0.0369385	0.642822
Danio_rerio_newGene_16121	7.51103	8.12927	5.14908	4.76809	5.96435	8.10242
Danio_rerio_newGene_16128	7.88698	7.55491	4.69843	5.20975	5.99873	9.0127
Danio_rerio_newGene_16129	0.375696	0.390298	0.54961	0.625915	0.26987	0.574938
Danio_rerio_newGene_16133	1.50343	1.75531	1.38739	1.19797	1.5108	1.57923
Danio_rerio_newGene_16151	1.13359	1.15844	0.735316	0.688005	1.31524	1.07711
Danio_rerio_newGene_16154	1.06533	0.874595	0.761972	1.12316	0.4659	0.313075
Danio_rerio_newGene_16155	2.33936	2.35067	1.82197	1.48439	1.41506	1.57175
Danio_rerio_newGene_16157	1.05384	0.301736	0.936592	1.08314	1.63805	1.49453
Danio_rerio_newGene_16159	0.366312	0.46766	0.169347	0.519931	0.542404	0.502655
Danio_rerio_newGene_16163	0.070823	0	0	0.203422	0	0
Danio_rerio_newGene_16170	0.968657	0.970633	0.717916	0.793333	0.955861	0.736392
Danio_rerio_newGene_16173	2.24077	3.57445	2.98471	3.46151	3.38803	3.00867
Danio_rerio_newGene_16177	11.4927	8.45629	8.29855	13.6014	10.176	8.70959
Danio_rerio_newGene_16179	0.0620225	0.149658	0.072903	0.23958	0	0.045095
Danio_rerio_newGene_16182	13.7675	14.2061	11.6934	10.9312	5.86807	11.3607
Danio_rerio_newGene_16183	0.752087	0.588525	0.669208	0.632243	0.521628	0.599216
Danio_rerio_newGene_16212	0.182984	0.147013	0.260972	0.499026	0.487747	0.597422
Danio_rerio_newGene_16217	1.99773	2.03244	1.7721	1.78691	1.91457	1.86776
Danio_rerio_newGene_16225	0.198348	0.199074	0.227079	0.214843	0.306425	0.161145
Danio_rerio_newGene_16228	0.104608	0.675473	0.158423	0.174181	0	0.216667
Danio_rerio_newGene_16255	0.219467	0.116575	0.106913	0.141716	0.262923	0.311224
Danio_rerio_newGene_16257	8.45937	7.91454	7.55647	5.93237	6.13609	7.45809
Danio_rerio_newGene_16265	0.561355	0.468854	0.28798	0.302318	0.685403	0.355298
Danio_rerio_newGene_16274	6.69387	5.61942	7.48381	7.73619	7.35806	7.95673
Danio_rerio_newGene_1629	0.173682	0.323151	0.172427	0.420857	0.506622	0.750329
Danio_rerio_newGene_16304	2.72089	2.09101	1.40943	2.25615	2.08568	2.95588
Danio_rerio_newGene_16313	1.70671	2.18093	1.4337	1.79752	1.54781	1.86446
Danio_rerio_newGene_16316	1.39407	1.34823	1.12238	1.21679	1.22159	1.59919
Danio_rerio_newGene_16321	0.142916	0.271806	0.357773	0	0.375066	0.191665
Danio_rerio_newGene_16333	0.442094	0.399669	0.395457	0.36099	0.302404	0.235632
Danio_rerio_newGene_16344	0.461635	0.213295	0.37005	0.404414	0.181107	0.139685
Danio_rerio_newGene_16347	0	0	0	0	0	0
Danio_rerio_newGene_16351	1.2994	1.76826	1.51722	2.50916	2.19877	1.35854
Danio_rerio_newGene_16355	0.158139	0.373171	0.388077	0.027768	0.123203	0.162492
Danio_rerio_newGene_16368	0.076098	0	0.504366	0.046063	0.113064	0.0337365
Danio_rerio_newGene_16372	0.106033	0.20137	0	0	0.157923	0.134012
Danio_rerio_newGene_16373	11.3545	19.7536	19.6883	30.1215	34.3432	30.7407
Danio_rerio_newGene_16403	0.123283	0.167049	0.0888135	0.188383	0.102269	0.201907
Danio_rerio_newGene_16404	24.6116	49.7543	37.2834	46.8047	71.4633	64.4252
Danio_rerio_newGene_16415	1.87878	1.8398	1.94238	2.1725	2.10473	2.00027
Danio_rerio_newGene_16416	22.887	37.3719	41.6636	47.1295	65.1927	58.4861
Danio_rerio_newGene_1645	0.416489	0.407704	0.18108	0.279439	0.144473	0.145932
Danio_rerio_newGene_16466	0.509964	0.362176	0.441685	0.184344	0.630032	1.01656
Danio_rerio_newGene_1647	0.520482	1.26027	0.583954	1.23023	1.29458	1.00684
Danio_rerio_newGene_16473	10.8615	12.1939	10.7825	12.2298	12.6389	13.5084
Danio_rerio_newGene_16480	2.2869	1.76355	1.20377	1.36549	1.26534	1.5472
Danio_rerio_newGene_16481	0.467637	0.759958	0.720867	0.388493	0.588468	0.197142
Danio_rerio_newGene_16487	31.8573	30.944	29.4661	22.1976	30.234	27.4622
Danio_rerio_newGene_16488	1.90016	2.02525	1.34742	1.41485	2.03739	3.14777
Danio_rerio_newGene_1650	0.004623	0.545472	0.018681	0.0453585	0.129372	0.27714
Danio_rerio_newGene_1651	0.144468	0.431084	0.431276	0.360382	0.284607	0.416305
Danio_rerio_newGene_16514	0.506212	0.569505	0.536425	0.681867	0.721666	0.626737
Danio_rerio_newGene_16515	0.502675	0.310141	0.214697	0.429886	0.415145	0.602465
Danio_rerio_newGene_16517	0.221014	0.197323	0.279202	0.285126	0.231869	0.341278
Danio_rerio_newGene_16520	0.200821	0.498901	0.165627	0.31397	0.595483	0.225602
Danio_rerio_newGene_16521	0.147198	0.209453	0.070435	0.293413	0.167943	0.108228
Danio_rerio_newGene_16546	5.30221	1.99384	3.70673	4.91609	4.6549	2.27684
Danio_rerio_newGene_16552	0.032528	0	0	0	0	0
Danio_rerio_newGene_16578	0.212524	0.577723	0.38188	0.65821	0.392897	0.509964
Danio_rerio_newGene_1658	0.0538845	0.0675455	0.018	0.07954	0.0192175	0
Danio_rerio_newGene_16586	3.01365	4.95437	2.33148	3.14997	4.50674	4.55505
Danio_rerio_newGene_16599	3.94772	3.38943	3.31748	4.69176	3.15391	3.55235
Danio_rerio_newGene_16603	0.489222	0.356579	0.515357	0.385792	0.159078	0.472349
Danio_rerio_newGene_16618	1.53201	2.6491	1.42156	2.0708	2.32135	2.13368
Danio_rerio_newGene_16626	0.101742	0	0	0.045495	0.043785	0.177351
Danio_rerio_newGene_16647	0.099637	0.131267	0.053491	0.014464	0.193039	0.141344
Danio_rerio_newGene_16651	0.207006	0.209865	0.517767	0.327188	0.376501	0.471733
Danio_rerio_newGene_16660	1.95817	2.69228	2.70961	2.57476	2.80948	3.14192
Danio_rerio_newGene_16667	0.33805	0.536655	0.525006	0.53469	0.175375	0.6027
Danio_rerio_newGene_16732	1.1984	0.490453	0.645722	0.93724	0.996684	0.564758
Danio_rerio_newGene_16738	0.0274515	0.142227	0.337677	0.131874	0.180019	0.042496
Danio_rerio_newGene_16739	0.0801875	0.225485	0.343087	0.189022	0.233948	0.359324
Danio_rerio_newGene_16779	0.214793	0.597422	0.244015	0.491996	0.343844	0.634368
Danio_rerio_newGene_16793	0.361965	0.407778	0.22581	0.295587	0.420434	0.405554
Danio_rerio_newGene_16794	0.214052	0.266528	0.279176	0.204035	0.257	0.234031
Danio_rerio_newGene_1680	0.137373	0.064568	0.0492365	0.147869	0.0703745	0.0681405
Danio_rerio_newGene_16804	0.796275	0.79651	1.02262	1.88741	1.66515	1.60051
Danio_rerio_newGene_16806	3.86467	5.3065	4.39788	3.73748	4.27954	4.64551
Danio_rerio_newGene_16810	0.278197	0.312428	0.0784975	0.359486	0.236158	0.300999
Danio_rerio_newGene_16811	1.86981	2.27403	1.69901	2.01053	1.88431	2.5087
Danio_rerio_newGene_16821	0.055516	0	0	0	0.231525	0
Danio_rerio_newGene_16824	0.862471	0.857398	0.920726	0.925841	0.696218	0.941994
Danio_rerio_newGene_16837	0	0	0	0	0	0
Danio_rerio_newGene_16857	0.0779025	0.221353	0.387907	0.719965	0.273547	0.320884
Danio_rerio_newGene_16860	1.69427	1.98996	1.63897	2.01315	1.80263	2.06477
Danio_rerio_newGene_16861	5.24224	4.20669	6.94863	5.91973	5.67864	6.24073
Danio_rerio_newGene_16863	2.22386	2.919	2.19061	2.54142	2.62229	2.99085
Danio_rerio_newGene_16870	1.9232	2.18242	1.37857	2.46185	1.62604	0.745721
Danio_rerio_newGene_16872	0.842336	0.85958	0.624298	0.624729	0.689949	0.770701
Danio_rerio_newGene_16884	0.423863	0.274871	0.451103	0.407929	0.54971	0.578859
Danio_rerio_newGene_1689	0	0	0	0.113464	0.126769	0.043026
Danio_rerio_newGene_16894	0.317559	0.417353	0.387645	0.277667	0.272142	0.428186
Danio_rerio_newGene_16896	0	0	0	0	0	0
Danio_rerio_newGene_16915	1.25092	1.26662	1.38575	1.84866	1.19031	2.1588
Danio_rerio_newGene_16932	0.201514	0.414422	0	0.196411	0.236052	0.212165
Danio_rerio_newGene_16935	0.296088	0.227596	0.205636	0.164324	0.205362	0.111997
Danio_rerio_newGene_16938	0.298762	0.392128	0.187778	0.339276	0.103079	0.341703
Danio_rerio_newGene_16947	0.192028	0.220792	0.319642	0.214844	0.159475	0.191209
Danio_rerio_newGene_16951	0.078741	0.187765	0	0	0.0995645	0.068812
Danio_rerio_newGene_16953	2.25468	2.10758	2.41571	2.34274	2.34852	2.66158
Danio_rerio_newGene_16956	1.44094	1.30786	0.802969	1.28967	1.47532	0.918663
Danio_rerio_newGene_1696	1.81226	2.52375	1.68219	1.8748	1.95767	2.34119
Danio_rerio_newGene_16966	2.36107	2.90357	1.74215	1.98347	1.76435	2.17744
Danio_rerio_newGene_16968	5.08382	6.01916	5.90483	6.45853	6.58127	9.04334
Danio_rerio_newGene_16969	0.829979	0.672915	0.531745	0.246258	0.448078	0.40805
Danio_rerio_newGene_16987	2.99143	2.72957	3.05942	3.38036	3.39567	3.67743
Danio_rerio_newGene_16991	9.78161	8.82212	3.91501	4.25713	1.01909	3.57549
Danio_rerio_newGene_16992	3.06688	3.71289	1.54127	1.52635	0.536421	1.01657
Danio_rerio_newGene_16998	0.631382	0.741816	0.574083	0.903239	0.915984	0.851338
Danio_rerio_newGene_17000	5.52842	7.66897	5.90781	6.9381	6.38286	7.49993
Danio_rerio_newGene_17014	3.02863	3.32217	4.73258	4.98974	2.32479	3.30817
Danio_rerio_newGene_17016	0.0964325	0.0962355	0.0775765	0.310156	0.050379	0.065411
Danio_rerio_newGene_17019	3.18314	4.99544	3.54591	4.1419	4.16014	5.05879
Danio_rerio_newGene_1702	0.130317	0.0406065	0	0	0.049222	0.167731
Danio_rerio_newGene_17028	1.18274	1.2925	0.838504	0.663984	1.17758	1.08164
Danio_rerio_newGene_17029	2.83609	3.23894	2.29919	1.88459	2.01201	2.06896
Danio_rerio_newGene_17033	2.17455	0.793135	0.608823	0.732734	0.9514	0.58322
Danio_rerio_newGene_17035	13.9839	11.8931	8.92771	4.56782	2.01366	3.66078
Danio_rerio_newGene_17037	1.30276	1.31633	0.685165	1.27606	1.22553	2.3793
Danio_rerio_newGene_17041	0.374101	0.395812	0.347756	0.228882	0.112866	0.075055
Danio_rerio_newGene_17044	7.63683	6.11226	5.98189	6.10832	6.48687	6.90195
Danio_rerio_newGene_1705	9.0313	8.20561	9.99725	5.0137	6.08854	6.16584
Danio_rerio_newGene_17050	0.756391	1.30628	1.02956	1.1926	0.742949	1.14648
Danio_rerio_newGene_17054	1.68604	1.09197	0.949705	0.978924	1.33688	1.29151
Danio_rerio_newGene_1706	0.148019	0.223845	0	0.232004	0.116575	0
Danio_rerio_newGene_17066	0.885632	0.706949	0.803684	0.793053	0.898159	0.860701
Danio_rerio_newGene_17070	2.00103	3.70034	3.09193	3.3181	3.00948	2.62195
Danio_rerio_newGene_17071	0.19538	0.488192	0.339755	0.902622	0.872234	0.151263
Danio_rerio_newGene_1709	3.51499	1.90749	3.54845	1.19819	1.68344	1.12892
Danio_rerio_newGene_17097	1.61607	1.3677	1.1296	1.04821	1.34506	1.33484
Danio_rerio_newGene_17099	0.949782	1.19501	0.730215	0.757276	0.618211	0.754779
Danio_rerio_newGene_171	1.44255	1.22776	1.47647	1.66172	1.43471	1.44093
Danio_rerio_newGene_1710	25.9714	24.1409	25.0321	22.0842	18.3608	20.9563
Danio_rerio_newGene_17102	2.34281	1.19305	1.2889	0.927493	1.23679	1.52494
Danio_rerio_newGene_17103	1.64875	1.54904	0.82706	1.25043	1.56814	1.00236
Danio_rerio_newGene_17104	0.531559	0.619059	0.621626	0.935818	0.754842	0.216917
Danio_rerio_newGene_17105	2.45495	1.4042	1.64772	1.53104	1.68647	1.66598
Danio_rerio_newGene_17106	0.58926	0.840192	0.560503	0.578523	0.655118	0.453379
Danio_rerio_newGene_17108	4.97902	5.91376	6.12383	7.12186	8.14434	6.61689
Danio_rerio_newGene_17112	0.664024	0.885234	0.853522	0.686354	0.893599	1.06801
Danio_rerio_newGene_17114	12.4435	10.0126	11.1588	10.4875	12.7783	12.2574
Danio_rerio_newGene_17116	6.14669	5.18346	4.71763	4.80839	3.71811	3.7313
Danio_rerio_newGene_17117	9.80891	7.35087	7.05218	7.7588	9.39195	7.28684
Danio_rerio_newGene_17118	1.53376	2.50945	1.54872	2.55432	3.14434	4.86813
Danio_rerio_newGene_17136	1.75642	1.7729	2.0428	1.69348	1.73297	2.05223
Danio_rerio_newGene_17139	3.85304	5.47564	5.99916	7.34837	7.69632	7.12724
Danio_rerio_newGene_1714	0	0.179816	0.0376515	0.0437365	0.041682	0.13133
Danio_rerio_newGene_17141	1.85573	1.19885	2.12342	1.55901	1.36269	2.08601
Danio_rerio_newGene_17148	9.52664	9.44458	9.11247	9.40261	10.4135	10.8829
Danio_rerio_newGene_17151	0.904756	0.831413	0.801673	0.684628	0.868413	0.494114
Danio_rerio_newGene_17154	2.52977	2.34474	2.48025	2.01951	2.04511	2.29838
Danio_rerio_newGene_17162	1.74713	1.46231	1.5115	1.33813	1.16656	1.5958
Danio_rerio_newGene_17163	1.44193	1.63319	1.12131	1.27843	1.54522	1.41591
Danio_rerio_newGene_17164	0.266568	0.204242	0.313298	0.219578	0.155296	0.425375
Danio_rerio_newGene_17166	0.574255	0.044025	0.440333	0	0	0.320628
Danio_rerio_newGene_17169	2.79735	2.41608	2.50934	2.38665	2.59394	2.63479
Danio_rerio_newGene_1717	0.130503	0.179013	0.13563	0.20796	0.109809	0.126078
Danio_rerio_newGene_17170	0.045572	0.015677	0.59105	0.212446	0.0804615	0.0948535
Danio_rerio_newGene_17175	6.47348	5.02108	5.54213	5.98102	5.9974	5.00721
Danio_rerio_newGene_17180	0.655688	0.406622	0.431633	0.494729	0.616147	0.449873
Danio_rerio_newGene_17185	0.10106	0.596542	0.108974	0	0.100584	0.078636
Danio_rerio_newGene_17190	0.741451	0.848301	0.602195	0.781191	1.109	0.474772
Danio_rerio_newGene_17209	3.09971	3.25905	2.7171	3.13698	4.31466	4.35916
Danio_rerio_newGene_17222	2.38673	3.16952	2.54574	1.8727	2.08545	2.74976
Danio_rerio_newGene_17223	0.792957	1.43882	1.29869	1.37094	0.978082	0.835859
Danio_rerio_newGene_17234	5.07717	4.27404	1.33447	4.95992	5.05321	5.63291
Danio_rerio_newGene_17236	0.896319	1.05941	1.06545	1.80467	0.975621	0.996435
Danio_rerio_newGene_17237	5.82082	7.40273	6.25982	6.66312	7.23499	8.63571
Danio_rerio_newGene_17238	2.79378	3.32317	3.72862	3.85207	4.58328	4.55857
Danio_rerio_newGene_17250	3.35325	4.66119	3.91635	4.45305	5.0444	5.63258
Danio_rerio_newGene_17266	4.51501	4.78911	4.22838	4.03431	3.8987	4.38026
Danio_rerio_newGene_17269	0.427596	0.611047	0.484433	0.636424	0.731084	0.325535
Danio_rerio_newGene_17274	1.7433	2.7833	1.89	2.93174	3.15859	3.46984
Danio_rerio_newGene_17303	0.134897	0	0	0	0.0379115	0.118278
Danio_rerio_newGene_17305	1.52891	1.72588	1.31152	1.45698	1.532	1.69376
Danio_rerio_newGene_17312	7.27083	5.44085	5.68049	4.60241	4.6432	5.66156
Danio_rerio_newGene_17325	9.059	7.5219	3.11665	3.70342	5.45959	9.85123
Danio_rerio_newGene_17330	0.249375	0.177391	0.190848	0.149351	0.325663	0.135432
Danio_rerio_newGene_17337	3.32742	3.2241	3.21089	3.74554	3.7352	2.98057
Danio_rerio_newGene_1734	0.963037	1.0754	1.17356	0.915598	0.697307	1.07867
Danio_rerio_newGene_17367	2.55904	3.9787	2.21657	2.25304	3.06101	3.28228
Danio_rerio_newGene_17385	0.676153	0.835985	0.618093	0.735561	0.794123	0.980905
Danio_rerio_newGene_17399	1.53791	1.05906	1.13975	2.67767	2.7923	2.66443
Danio_rerio_newGene_17449	1.744	2.74884	2.37615	2.61559	2.603	2.48574
Danio_rerio_newGene_17473	0.0253275	0.138867	0.189666	0.298283	0.072334	0.128408
Danio_rerio_newGene_17502	4.44491	4.1874	4.26536	4.03725	3.22183	4.96003
Danio_rerio_newGene_17511	1.09924	1.23023	0.932241	0.93312	1.09824	1.6579
Danio_rerio_newGene_17513	4.5219	3.24057	4.32113	3.13188	2.44787	2.85417
Danio_rerio_newGene_17520	1.72327	1.32553	2.05067	0.443104	0.745256	1.33047
Danio_rerio_newGene_17545	0.0232775	0.144267	0	0.15846	0.288695	0.186077
Danio_rerio_newGene_17547	0.0565745	0.162206	0.080586	0.241663	0.103413	0.278382
Danio_rerio_newGene_17564	0.0458235	0.043069	0.095867	0.146022	0.139243	0.097422
Danio_rerio_newGene_1759	0.0376295	0.268762	0.282254	0.186723	0.226134	0.296418
Danio_rerio_newGene_176	2.25942	2.4376	2.02067	1.95183	1.96071	1.7477
Danio_rerio_newGene_17602	2.62231	3.69814	3.15001	3.63227	3.16631	3.57625
Danio_rerio_newGene_17619	0	0	0	0	0.110504	0.0649715
Danio_rerio_newGene_17621	0.215737	0.0802865	0.245447	0.210052	0.169192	0.201791
Danio_rerio_newGene_17626	1.0424	1.87817	0.855938	0.490782	1.31755	1.43947
Danio_rerio_newGene_1766	3.95009	3.21629	3.46769	3.35419	3.56836	3.5474
Danio_rerio_newGene_17664	0.45962	0.199632	0.12128	0.146621	0.188994	0.370194
Danio_rerio_newGene_17667	0.205909	0.435588	0.151724	0.437559	0.321022	0.308759
Danio_rerio_newGene_1767	0.20895	0.273838	0.117348	0.229248	0.20642	0.304069
Danio_rerio_newGene_17683	1.02153	0.786093	0.489844	0.250169	0.416734	0.223083
Danio_rerio_newGene_17686	0.617727	0.547813	0.867426	0.436494	0.557231	0.325203
Danio_rerio_newGene_17699	0.105317	0.0675695	0.0401295	0.187893	0.0392455	0.059509
Danio_rerio_newGene_177	2.21818	2.18204	1.84491	1.35374	1.79875	1.79051
Danio_rerio_newGene_17706	2.62384	2.97367	3.18145	2.17994	2.84122	2.79958
Danio_rerio_newGene_17717	0.763802	0.9819	0.91881	0.867085	0.729045	1.31014
Danio_rerio_newGene_17731	0.444728	0.493617	0.641602	0.488144	0.468893	0.550578
Danio_rerio_newGene_17739	0.515943	0	0.143582	0.242955	0.0395845	0.27535
Danio_rerio_newGene_17756	0.341947	0.55576	0.405093	0.567734	0.477092	0.460165
Danio_rerio_newGene_17765	0.434708	0.636505	0.834927	0.551504	1.07152	1.13098
Danio_rerio_newGene_17773	3.02535	2.77512	2.15292	2.09438	2.05538	2.8642
Danio_rerio_newGene_17775	1.02852	1.37167	1.40673	1.13626	1.7978	1.77384
Danio_rerio_newGene_17783	0.919157	1.07429	0.772813	1.04068	1.31709	1.20399
Danio_rerio_newGene_17788	0.649888	0.928804	0.645045	0.840415	0.71589	1.10652
Danio_rerio_newGene_17802	0.151598	0.185369	0.210424	0.15678	0.190033	0.322131
Danio_rerio_newGene_17815	1.11658	0.959479	1.1053	0.984546	1.1414	1.16851
Danio_rerio_newGene_17822	0.404116	0.29251	0.756609	0.482115	0.344579	0.43918
Danio_rerio_newGene_17828	0.657205	1.05828	0.734625	0.656137	0.731729	1.02605
Danio_rerio_newGene_17855	1.10001	0.63315	0.847432	0.784473	0.638603	0.79972
Danio_rerio_newGene_17863	0.601865	0.936368	0.471583	0.779529	0.794323	0.934724
Danio_rerio_newGene_17867	0	0.161342	0.269902	0.151737	0	0
Danio_rerio_newGene_17868	0.212215	0.0807935	0.164542	0.050879	0.0567945	0.091144
Danio_rerio_newGene_17885	5.46891	3.18286	1.57655	1.71441	0.930608	1.37616
Danio_rerio_newGene_17893	2.06907	2.52532	1.42142	1.56215	1.99936	2.58188
Danio_rerio_newGene_17898	0.063156	0.638276	0.373096	0.829097	0.241109	0.266973
Danio_rerio_newGene_17902	0.332635	0.207865	0.284988	0.316939	0.29686	0.403128
Danio_rerio_newGene_1792	11.0748	12.65	11.0788	11.3862	11.4379	11.3441
Danio_rerio_newGene_17929	0.325261	0.258011	0.268247	0.452284	0.571139	0.393145
Danio_rerio_newGene_1794	3.12465	2.00646	1.30722	1.99925	1.51397	1.42935
Danio_rerio_newGene_17952	0.492493	0.501037	0.467372	0.698857	0.548503	0.63562
Danio_rerio_newGene_17955	0.496354	1.31327	1.02823	1.28576	1.68581	1.2437
Danio_rerio_newGene_17956	0.0879085	0.421608	0.334	0.186468	0.519402	0.280419
Danio_rerio_newGene_17957	0.220734	0.386896	0.349834	0.194035	0.139329	0.27566
Danio_rerio_newGene_17958	0.503918	0.325101	0.132086	0.590454	0.334026	0.624974
Danio_rerio_newGene_17959	0.462226	0.47661	0.735783	0.574521	0.610886	0.91765
Danio_rerio_newGene_17989	0.708701	0.578202	1.15153	0.566338	0.506448	0.385553
Danio_rerio_newGene_17996	0.159	0.0992865	0	0.056735	0	0.094001
Danio_rerio_newGene_18001	2.34213	2.25754	1.77848	1.45749	2.04578	1.48037
Danio_rerio_newGene_18006	42.1415	37.0559	25.0639	24.7637	21.1077	15.8165
Danio_rerio_newGene_18011	0.172081	0.234493	0.372635	0.489901	0.298959	0.38781
Danio_rerio_newGene_18012	1.07116	0.876918	0.876904	1.5105	1.16018	1.57288
Danio_rerio_newGene_18015	11.4481	7.77198	7.61621	5.39644	5.46226	5.69792
Danio_rerio_newGene_18028	0.270153	0.487203	0.424187	0.203593	0.13405	0.159299
Danio_rerio_newGene_18031	0.381597	0.538664	0.189797	0	0.074405	0
Danio_rerio_newGene_18037	0.0840255	0.175406	0.066756	0.226193	0.0415185	0.0483385
Danio_rerio_newGene_18039	0.27668	0.101713	0	0	0	0.187066
Danio_rerio_newGene_1804	0.118513	0.422849	0.19087	0.218864	0.830141	0.549208
Danio_rerio_newGene_18042	3.7254	5.26785	3.98278	5.03366	5.22119	5.54371
Danio_rerio_newGene_18049	0.750217	0.737489	0.824965	0.711544	0.82642	1.01625
Danio_rerio_newGene_18052	1.11728	1.73605	1.28829	1.17226	1.69305	1.59037
Danio_rerio_newGene_18076	0	0.252063	0.064051	0.067128	0.0688045	0
Danio_rerio_newGene_18093	0.364609	0.410432	0.41434	0.335153	0.408797	0.252094
Danio_rerio_newGene_18096	0.758315	1.36293	1.4384	1.66758	2.60019	1.55868
Danio_rerio_newGene_18115	19.2462	25.2755	17.8325	18.5051	19.005	20.3885
Danio_rerio_newGene_18123	0.0600365	0.0440275	0.111503	0.385195	0.084178	0.43228
Danio_rerio_newGene_18138	0.239844	0.0257565	0	0.136426	0	0.0640585
Danio_rerio_newGene_18142	5.72949	7.91366	3.9263	4.14241	3.90543	5.00644
Danio_rerio_newGene_18153	2.00823	3.17271	2.06332	2.20586	1.92955	2.07771
Danio_rerio_newGene_18168	4.56173	7.13002	5.20295	5.59711	6.33121	6.15182
Danio_rerio_newGene_18169	0.225636	0.180518	0.088991	0.169592	0.157536	0.112112
Danio_rerio_newGene_18172	7.92079	10.2719	8.75036	7.43001	8.7806	9.34269
Danio_rerio_newGene_18175	3.28043	6.00566	3.62661	3.83193	4.27732	4.65753
Danio_rerio_newGene_18177	3.38917	4.49839	2.89912	4.739	3.34507	4.45215
Danio_rerio_newGene_18180	0.0831255	0	0.0346845	0	0.12159	0.159254
Danio_rerio_newGene_18183	5.13768	6.642	4.79938	6.08347	6.69103	6.78159
Danio_rerio_newGene_18185	7.10642	4.53628	4.42852	5.90696	6.82598	5.37997
Danio_rerio_newGene_18186	8.18818	6.87941	6.87452	7.28345	6.5626	6.47976
Danio_rerio_newGene_18193	0.147792	0.0796	0.16509	0.311803	0.64624	0.207537
Danio_rerio_newGene_18201	6.08649	6.26991	4.91012	9.84978	6.45943	8.50329
Danio_rerio_newGene_18202	3.70923	4.65214	3.58427	4.22259	5.68142	4.58878
Danio_rerio_newGene_18217	0.69124	1.1287	0.97754	1.04601	0.74287	0.712775
Danio_rerio_newGene_18228	1.68621	2.01553	2.54057	2.58501	2.50922	3.18847
Danio_rerio_newGene_18236	1.46729	0.978983	1.00218	1.11592	1.66244	1.54336
Danio_rerio_newGene_18242	4.14243	3.92256	5.82569	5.80277	5.96513	5.91393
Danio_rerio_newGene_18250	5.26127	8.13277	4.70155	6.53885	8.52447	7.81577
Danio_rerio_newGene_18251	0.480548	0.594757	0.708615	0.390473	0.672153	0.549323
Danio_rerio_newGene_18258	0.23982	0.217544	0.322111	0.203653	0.310825	0.206117
Danio_rerio_newGene_1826	0.403449	0.468972	0.452227	0.511427	0.435553	0.184152
Danio_rerio_newGene_18260	0.0774025	0.164847	0.13637	0.20893	0.194354	0.570052
Danio_rerio_newGene_18261	0.748703	0.678797	0.48405	0.404393	0.359773	0.629431
Danio_rerio_newGene_18264	3.63647	4.62182	3.57596	4.13099	5.12617	6.2432
Danio_rerio_newGene_18265	2.35084	2.38259	2.12313	2.01702	2.6488	4.45914
Danio_rerio_newGene_18266	0.533492	0.472819	0.367183	0.190557	0.548263	0.759362
Danio_rerio_newGene_18268	1272.86	2205.16	507.791	369.566	584.961	537.722
Danio_rerio_newGene_18274	1.36653	0.980309	0.869534	0.733081	0.861536	0.889427
Danio_rerio_newGene_18275	1.96101	1.85239	1.8192	2.07931	1.5296	1.31808
Danio_rerio_newGene_18276	1.31742	0.808614	1.03948	0.759648	0.565817	0.47012
Danio_rerio_newGene_18277	3.3137	3.76388	3.21762	3.78454	3.62976	3.49446
Danio_rerio_newGene_18282	6.96865	5.97941	5.97679	6.23001	6.51273	6.91012
Danio_rerio_newGene_18283	0	0	0.143174	0	0	0
Danio_rerio_newGene_18285	0.567115	0.534424	0.493669	0.396184	0.447301	0.402046
Danio_rerio_newGene_18286	0.305126	0.272806	0.285635	0.254187	0.138928	0.11231
Danio_rerio_newGene_18295	0	0	0	0	0	0.058832
Danio_rerio_newGene_18296	0.031643	0.269101	0.348699	1.06705	0.254582	0.223273
Danio_rerio_newGene_183	0	0.0321445	0	0.0987235	0	0.197203
Danio_rerio_newGene_18310	11.8086	9.1955	12.064	4.15401	8.66191	6.14288
Danio_rerio_newGene_18320	0	0.045433	0	0.196536	0.10258	0
Danio_rerio_newGene_18335	0.338933	0	0	0	0.120693	0
Danio_rerio_newGene_18342	0.084815	0.245171	0.534479	0.288739	0.417773	0.525652
Danio_rerio_newGene_18345	0.220625	0.136044	0.184373	0.183352	0.236465	0.367798
Danio_rerio_newGene_18349	0.333464	0.626551	0	0.339687	0.148925	0
Danio_rerio_newGene_1835	1.96968	1.66798	1.46865	1.2746	1.74742	1.66488
Danio_rerio_newGene_18350	0.155127	1.53442	0.477291	0.292949	1.22681	0.119675
Danio_rerio_newGene_18375	0.615417	0.883288	2.69918	1.12875	0.963473	0.38671
Danio_rerio_newGene_18383	1.03706	1.06867	0.97356	0.770709	0.602456	0.75024
Danio_rerio_newGene_18385	0.11416	0.124886	0.426377	0.226023	0.053676	0.199091
Danio_rerio_newGene_18399	0.322248	0.111024	0.521429	0.795392	0.151684	0.477097
Danio_rerio_newGene_184	0.0178405	0	0	0	0	0.0224875
Danio_rerio_newGene_18414	0.471498	0.848008	0.369125	0.724974	0.612633	0.374441
Danio_rerio_newGene_18430	0.643701	0.773041	0.624167	0.581626	0.082459	0.179554
Danio_rerio_newGene_18433	5.45229	5.20866	4.36363	4.29116	5.05005	5.71379
Danio_rerio_newGene_18435	6.8834	6.60439	5.97468	5.39485	7.35816	6.34137
Danio_rerio_newGene_18440	1.29081	1.09815	0.628877	1.27576	1.29718	1.3489
Danio_rerio_newGene_18445	1.61939	1.35341	1.05828	0.827398	1.06971	1.09994
Danio_rerio_newGene_18446	1.90665	1.60618	0.919847	1.3165	1.30534	0.852743
Danio_rerio_newGene_18447	0.8964	1.11169	0.732684	0.353429	0.601392	0.350235
Danio_rerio_newGene_18450	0.49128	0.886015	0.530232	0.607965	0.743488	0.855457
Danio_rerio_newGene_18458	0.73805	0.933943	0.906645	0.849058	0.781166	0.846893
Danio_rerio_newGene_18506	16.9466	14.5111	9.68964	8.9542	11.1088	14.2271
Danio_rerio_newGene_18520	0.136234	0.312551	0.238217	0.347893	0.181034	0.346102
Danio_rerio_newGene_18524	6.17915	7.64874	5.55753	6.61213	6.59944	4.95337
Danio_rerio_newGene_18560	0.397788	0.59472	0.283296	0.294832	0.414514	0.451676
Danio_rerio_newGene_18563	0	0	0	0	0	0.255671
Danio_rerio_newGene_18570	1.65381	2.41646	1.35988	1.58864	1.07796	0.860217
Danio_rerio_newGene_18607	12.1643	13.406	9.24753	10.3738	11.9768	15.2753
Danio_rerio_newGene_18624	1.03941	1.26689	1.57498	1.41285	1.19766	1.43561
Danio_rerio_newGene_18629	0.062099	0.336206	0.154643	0.341674	0.0618865	0.236609
Danio_rerio_newGene_18659	0	0	0.0693115	0.0993035	0.224143	0.104899
Danio_rerio_newGene_18668	0.242375	0.44731	0.114407	0.244895	0.287564	0.145629
Danio_rerio_newGene_18678	0.287288	0.476311	0.262521	0.432964	0.308571	0.414255
Danio_rerio_newGene_18691	0.030165	0.151423	0	0.071202	0	0.09115
Danio_rerio_newGene_18697	0.80892	0.153903	0.206999	0.461868	0.140806	0.177202
Danio_rerio_newGene_18698	0.398327	0.558365	0.404992	0.47165	0.964682	0.888938
Danio_rerio_newGene_18700	0.161031	0.501691	0.132568	0.127509	0.290315	0.235029
Danio_rerio_newGene_18702	5.89629	6.78856	9.17742	9.67842	9.87456	9.9947
Danio_rerio_newGene_18711	5.8564	7.20985	5.02555	7.03881	7.5937	7.60665
Danio_rerio_newGene_18727	0	0	0	0	0	0.248083
Danio_rerio_newGene_18732	0.218357	0.083903	0.142749	0.053785	0.047796	0
Danio_rerio_newGene_1874	0.0678165	0.225287	0.213332	0.137076	0.0228705	0.213845
Danio_rerio_newGene_18753	0.877873	1.14192	0.524428	1.22307	0.906134	0.976976
Danio_rerio_newGene_18782	0.065539	0.267688	0.40372	0	0.049938	0.450833
Danio_rerio_newGene_18790	0.425326	0.254822	0.347683	0.20855	0.405833	0.482955
Danio_rerio_newGene_1881	0.197718	0.526973	0.204185	0.411013	0.366407	0.352595
Danio_rerio_newGene_18818	0.142466	0.363109	0.1444	0.233583	0.240205	0.652679
Danio_rerio_newGene_18838	1.04005	1.09714	1.19563	0.649989	0.694881	0.81344
Danio_rerio_newGene_18839	0.652609	0.694403	1.04885	0.780955	0.739106	0.93845
Danio_rerio_newGene_18847	0.377603	0.077982	0.0270675	0.359003	0.0358145	0.0529785
Danio_rerio_newGene_18876	0.0581475	0.0219095	0.0748495	0.0443605	0.073947	0.110987
Danio_rerio_newGene_1888	1.94302	3.10723	1.95944	2.63932	2.30868	3.8602
Danio_rerio_newGene_18896	0.0968635	0.358946	0.0593505	0.244365	0.379678	0.462556
Danio_rerio_newGene_1891	0.345732	0.0885385	0.109457	0.218037	0.0427285	0.229664
Danio_rerio_newGene_18924	0.472676	0.367048	0.308588	0.430572	0.179051	0.196161
Danio_rerio_newGene_18927	0.669149	0.304546	0.565407	0.771008	0.479332	0.389171
Danio_rerio_newGene_18937	0.0299995	0.0519775	0.014336	0.033986	0	0
Danio_rerio_newGene_1894	0.366824	0	0.144743	0.131734	0.308605	0.136546
Danio_rerio_newGene_18945	1.38094	2.13947	0.641548	2.7054	1.12068	1.978
Danio_rerio_newGene_18952	1.18126	0.803081	0.780063	0.687847	0.700457	0.908872
Danio_rerio_newGene_18962	0.727887	0.682544	0.834036	0.740929	0.547054	0.900995
Danio_rerio_newGene_18963	0	0.142508	0.141093	0	0.289968	0.147639
Danio_rerio_newGene_18967	4.03699	3.49553	1.95677	0.929044	0.756638	0.929596
Danio_rerio_newGene_18978	0.648608	0.816443	1.24474	1.41599	0.989575	0.806043
Danio_rerio_newGene_18992	3.5953	3.1841	3.93504	3.38461	4.20087	4.96642
Danio_rerio_newGene_19	1.86528	1.00724	0.495829	0.516995	0.61763	1.16501
Danio_rerio_newGene_19004	2.83583	8.3923	0.690618	8.27145	9.90523	8.07099
Danio_rerio_newGene_19008	0.723474	1.46656	0.939733	1.72274	1.84676	1.68331
Danio_rerio_newGene_1901	0.395884	0.650005	0.594567	0.612602	0.14666	0.794843
Danio_rerio_newGene_19014	0.584259	0.441263	0.576236	0.697526	0.560952	0.78893
Danio_rerio_newGene_19036	4.74282	8.04953	5.93249	6.45739	8.42975	8.30725
Danio_rerio_newGene_19061	5.26932	4.44513	4.55464	4.17506	4.55289	5.07571
Danio_rerio_newGene_19064	11.8626	10.8497	12.8167	7.10874	8.39534	8.10132
Danio_rerio_newGene_19076	0	0	0.219823	0	0.329165	0
Danio_rerio_newGene_19082	0.517177	1.4067	0.234129	1.47248	0.951522	0.799552
Danio_rerio_newGene_19084	0.147343	0.250999	0.127268	0.221789	0.626649	0.443721
Danio_rerio_newGene_19091	1.52178	1.80046	1.17613	1.27642	1.83956	1.94134
Danio_rerio_newGene_19108	0.0918125	0.083709	0.028084	0.154648	0	0.277587
Danio_rerio_newGene_19121	1.59918	0.939715	0.470081	0.223527	0.066071	0
Danio_rerio_newGene_19125	0.578642	1.03359	0.668543	0.686342	1.12308	1.02603
Danio_rerio_newGene_19159	0.168893	0.121479	0.310922	0.049215	0.167368	0
Danio_rerio_newGene_19171	0	0.347464	0.175447	0.645512	0.116447	0.248816
Danio_rerio_newGene_19184	6.24699	5.69856	4.87543	4.98866	7.65465	6.91221
Danio_rerio_newGene_19191	0.175836	0.177019	0.149385	0.0697675	0.046783	0.189184
Danio_rerio_newGene_19201	11.333	14.3625	17.48	20.0316	18.2428	17.4608
Danio_rerio_newGene_19211	1.13966	0.925352	0.812559	0.873687	0.821497	0.681663
Danio_rerio_newGene_19215	0.272186	0.519561	0.507517	0.336489	0.377731	0.186816
Danio_rerio_newGene_19240	1.97131	2.02126	0.910432	0.703022	1.13352	0.664762
Danio_rerio_newGene_19250	0.440954	0.191605	0.164799	0.604286	0.399407	0.213243
Danio_rerio_newGene_19251	0.413773	0.458373	0.61053	0.326534	0.315557	0.38526
Danio_rerio_newGene_19261	8.26808	10.4266	7.69897	8.78155	9.89642	8.12121
Danio_rerio_newGene_19272	2.31056	2.13721	2.94598	2.30403	2.62394	2.85346
Danio_rerio_newGene_19291	0.362999	0.332713	0.0898895	0.198868	0.219508	0.243134
Danio_rerio_newGene_193	2.15059	1.75194	1.53481	1.61666	1.61306	1.25168
Danio_rerio_newGene_19302	847.588	726.421	910.607	889.644	904.261	950.214
Danio_rerio_newGene_19351	1.57603	2.27251	1.70817	2.33763	1.87373	1.30537
Danio_rerio_newGene_19355	2.65944	2.57808	2.60578	2.1751	2.56899	2.27042
Danio_rerio_newGene_1937	0.922438	1.91731	1.2132	1.11333	0.751742	1.20155
Danio_rerio_newGene_19373	0.542727	0.756267	0.76999	0.840833	0.389804	0.395711
Danio_rerio_newGene_1943	0.197203	0.250477	0	0.383619	0.0585325	0.0104755
Danio_rerio_newGene_19456	0.0782155	0.187114	0.14323	0	0.335755	0.341836
Danio_rerio_newGene_19484	2.40597	2.94317	3.62455	2.98687	2.70599	2.68597
Danio_rerio_newGene_19487	1.32678	2.468	1.6201	1.66428	2.10327	1.61415
Danio_rerio_newGene_19488	0.59894	0.120647	0.164423	0.046748	0.141984	0.31109
Danio_rerio_newGene_1949	3.24449	3.32938	3.97247	1.5501	2.53544	3.25451
Danio_rerio_newGene_19491	0.238246	1.48419	0.806548	0.638932	0.744159	0.541258
Danio_rerio_newGene_1953	0.515571	0.713404	0.55707	0.457981	0.261215	0.372127
Danio_rerio_newGene_19531	0.942401	1.07438	0.7795	0.90049	1.22824	1.17261
Danio_rerio_newGene_19560	2.46101	2.70804	2.38532	2.7886	2.96218	2.56561
Danio_rerio_newGene_19567	1.02786	1.11847	1.52688	2.16545	1.63101	1.22128
Danio_rerio_newGene_19569	1.29519	1.77578	1.3826	2.04652	1.91888	1.72157
Danio_rerio_newGene_19570	5.47918	6.84259	7.08682	6.30264	7.43998	6.33566
Danio_rerio_newGene_19572	0	0	0	0	0.0886885	0
Danio_rerio_newGene_19574	1.17483	1.68753	0.934859	1.72452	1.5174	1.84012
Danio_rerio_newGene_19577	5.06545	5.00023	5.15021	6.64609	7.17505	5.71328
Danio_rerio_newGene_19587	3.51364	4.29565	3.48283	3.21437	4.42695	4.38206
Danio_rerio_newGene_19613	0	0.231477	0.058745	0.125978	0.185316	0.14448
Danio_rerio_newGene_19619	3.063	2.96961	3.55027	2.93195	3.73699	3.90293
Danio_rerio_newGene_19624	0.559245	0.748572	0.778645	1.62124	1.42921	0.598547
Danio_rerio_newGene_19631	0.824594	0.576694	0.378154	0.618511	0.270803	0.603202
Danio_rerio_newGene_19640	3.64905	3.69215	2.49673	2.12072	2.35115	2.6045
Danio_rerio_newGene_19641	5.03756	6.07682	5.73247	6.01041	7.76507	7.52401
Danio_rerio_newGene_19649	6.11245	8.44675	7.06463	4.33248	2.53258	1.54867
Danio_rerio_newGene_19650	9.31402	11.1904	10.1936	6.20539	3.24601	2.47232
Danio_rerio_newGene_19651	11.637	15.026	12.2457	8.3981	4.55489	3.77408
Danio_rerio_newGene_19652	6.75439	9.63212	7.773	4.9717	2.92447	2.37659
Danio_rerio_newGene_19653	0.209014	0.481372	0.232435	0.31089	0.482594	0.543095
Danio_rerio_newGene_19654	4.7686	7.2747	5.77545	6.77452	6.3573	7.17954
Danio_rerio_newGene_19656	3.73418	3.6249	3.37679	1.83153	3.70092	3.17997
Danio_rerio_newGene_19658	0.0808785	0.095745	0.20806	0.205034	0.0521565	0.12356
Danio_rerio_newGene_19666	1.30991	1.30246	1.60451	1.23256	1.27403	1.38894
Danio_rerio_newGene_1967	3.6954	3.75218	3.50714	3.18143	3.47732	3.30813
Danio_rerio_newGene_19677	0.499093	0.310858	0.219123	0.50796	0.326	0.327939
Danio_rerio_newGene_19679	19.2748	18.9761	13.711	9.72288	12.7318	16.2709
Danio_rerio_newGene_1968	2.45641	2.87139	2.55725	2.54673	2.57316	2.53749
Danio_rerio_newGene_19688	5.6978	5.10745	3.89957	4.62555	3.7127	4.42651
Danio_rerio_newGene_19693	36.6152	57.38	40.2824	46.7278	52.9441	56.7385
Danio_rerio_newGene_19697	1.04477	0.541998	0.964709	0.555233	1.18714	1.10149
Danio_rerio_newGene_19713	0.493058	1.14742	0.432349	0.536228	0.657725	0.672181
Danio_rerio_newGene_19715	1.04201	2.11988	1.16361	1.97664	2.11384	2.16216
Danio_rerio_newGene_19716	17.4483	16.5588	13.8479	19.6634	17.4783	15.1478
Danio_rerio_newGene_19718	2.94109	4.85352	2.19356	3.43918	4.2442	4.46913
Danio_rerio_newGene_1972	12.4886	9.53299	12.7985	5.94404	6.12859	7.34144
Danio_rerio_newGene_19723	1.4805	1.33278	1.92292	1.31386	2.34648	2.53603
Danio_rerio_newGene_19725	12.1782	9.71908	19.7429	27.0942	18.5475	10.5214
Danio_rerio_newGene_19726	1.96824	1.90815	2.52211	1.94146	2.41644	2.89805
Danio_rerio_newGene_19728	7.31442	8.17091	7.59223	7.87909	7.77043	7.78179
Danio_rerio_newGene_19732	6.26528	6.66775	9.43871	6.45712	8.49885	6.7169
Danio_rerio_newGene_19733	2.32143	2.35882	2.34186	2.15206	2.03038	2.44037
Danio_rerio_newGene_19742	2.86859	1.61707	4.18346	2.99292	3.74083	3.41651
Danio_rerio_newGene_19743	2.3854	1.92745	2.26924	2.25075	2.02492	1.88833
Danio_rerio_newGene_19749	4.24775	6.29377	4.79491	5.84635	7.23918	6.14456
Danio_rerio_newGene_19751	0.45846	0.801983	0.361497	1.20625	1.01905	0.794633
Danio_rerio_newGene_19754	0.872162	0.708671	0.830299	0.794784	0.715472	0.803528
Danio_rerio_newGene_19758	11.0092	8.90968	9.60248	10.6517	10.5238	11.4871
Danio_rerio_newGene_19759	1.4704	1.58468	1.70008	1.46122	1.92129	1.67109
Danio_rerio_newGene_19760	1.84458	2.60835	2.22609	1.94771	2.46776	2.63811
Danio_rerio_newGene_19764	0.383404	0.360899	0.347929	0.449115	0.201365	0.303497
Danio_rerio_newGene_19765	0.101288	0	0.038723	0.155751	0	0.270712
Danio_rerio_newGene_1977	1.68927	1.14332	1.58699	1.36842	0.827705	1.0526
Danio_rerio_newGene_19771	0.776263	1.07403	1.62889	0.246253	1.26107	0.571271
Danio_rerio_newGene_19810	0	0.055193	0.151588	0.055609	0.216793	0
Danio_rerio_newGene_1982	0.075489	0.126727	0.124516	0.087028	0.144735	0.279457
Danio_rerio_newGene_19823	1.73218	1.59068	1.81636	2.02877	2.19017	1.95019
Danio_rerio_newGene_19825	0.148599	0.233377	0.1948	0.395974	0.31985	0.22816
Danio_rerio_newGene_19826	1.06736	1.04893	1.26089	0.972957	1.24618	1.34045
Danio_rerio_newGene_19833	1.8752	1.14354	1.20016	1.04046	0.788994	1.30799
Danio_rerio_newGene_19846	0.531635	0.438196	0.708618	0.533257	0.397555	0.642999
Danio_rerio_newGene_19864	1.19129	1.28949	1.76731	1.23513	1.24665	1.39471
Danio_rerio_newGene_19865	0.330794	0.08487	0.12193	0.233899	0.056224	0.293816
Danio_rerio_newGene_19867	2.6068	2.66765	2.40392	2.39167	3.17005	2.75972
Danio_rerio_newGene_19884	1.11292	0.868801	1.17676	2.08449	0.596033	0.214043
Danio_rerio_newGene_19886	0.347554	0	0.124404	0.126441	0	0.103574
Danio_rerio_newGene_19891	0.798255	0.998262	0.856733	1.07996	0.811578	0.874513
Danio_rerio_newGene_19894	0.258637	0.266436	0.350569	0.478572	0.237951	0.29472
Danio_rerio_newGene_19896	5.11431	7.50565	4.26645	7.08813	6.10961	6.86172
Danio_rerio_newGene_19906	0.684455	0.92284	0.817106	0.843368	0.892738	1.17596
Danio_rerio_newGene_19919	0	0.024584	0	0.155958	0.123122	0.142185
Danio_rerio_newGene_1992	0.703593	0.99746	1.0025	1.07947	1.16494	0.903465
Danio_rerio_newGene_19923	0.198913	0.280935	0.167847	0.280267	0.276786	0.282903
Danio_rerio_newGene_19947	3.34666	3.95711	3.14949	3.91582	3.08716	4.42501
Danio_rerio_newGene_19954	0.292783	0.346471	0.364955	0.571098	0.231869	0.250992
Danio_rerio_newGene_19955	0.507336	0.880977	0.808449	0.906922	0.39209	0.570416
Danio_rerio_newGene_19979	2.05211	2.72128	2.08597	2.33634	2.09035	2.64425
Danio_rerio_newGene_19980	2.81389	2.45996	1.94633	1.39281	1.45317	1.2869
Danio_rerio_newGene_19986	2.08218	1.97599	1.71983	1.56452	1.97538	2.27731
Danio_rerio_newGene_19988	15.0222	12.8583	10.8213	9.85292	10.1888	10.8445
Danio_rerio_newGene_19997	0.240098	0.207535	0.185229	0.135609	0.432081	0.480247
Danio_rerio_newGene_20044	0.305113	0.117196	0.659867	0.504754	0.184702	0.665864
Danio_rerio_newGene_20058	0.263891	0.873885	0.162758	0.433279	0.670656	0.807193
Danio_rerio_newGene_20059	0	0	0.366111	0.13586	0.094825	0.101165
Danio_rerio_newGene_20103	0.103314	0.2594	0	0	0	0.167503
Danio_rerio_newGene_20111	0.170267	0.136435	0.108435	0.141356	0	0.131079
Danio_rerio_newGene_20114	1.29088	1.90077	1.30536	1.71315	1.58283	1.26229
Danio_rerio_newGene_20115	6.02955	3.09916	2.79424	2.41701	2.70946	3.17677
Danio_rerio_newGene_20137	0.106518	0.178758	0.101692	0.16578	0.712171	0.232679
Danio_rerio_newGene_20139	0	0.0293525	0.221965	0.0724595	0.410239	0.141164
Danio_rerio_newGene_20140	0.351479	0.162522	0.363453	0.229264	0.192167	0.369257
Danio_rerio_newGene_20143	0.317364	0.253373	0.188663	0.183598	0.211004	0.194219
Danio_rerio_newGene_20147	0.478565	0.098629	0.164952	0.296716	0.0112615	0.454106
Danio_rerio_newGene_20152	0.174774	0.269003	0.0588175	0.328126	0.0346375	0.114847
Danio_rerio_newGene_20155	13.33	13.2604	12.6126	8.29263	3.5886	3.95199
Danio_rerio_newGene_20156	0.0966925	0.033054	0.131889	0.201785	3.57634	3.11651
Danio_rerio_newGene_2016	1.51553	1.46011	1.74223	1.67045	1.92954	2.23393
Danio_rerio_newGene_20175	0.186256	0.181624	0.0840945	0.236663	0.227802	0.386692
Danio_rerio_newGene_20184	0	0	0.0318435	0.0474265	0.100376	0.117901
Danio_rerio_newGene_20186	0.203664	0	0	0	0	0.117611
Danio_rerio_newGene_20187	0.904011	0.532416	0.769892	0.628015	0.733683	0.628221
Danio_rerio_newGene_20190	0.0969375	0.891428	0.0352175	0	0.244364	0.0652765
Danio_rerio_newGene_20200	1.27744	0.710684	0.79468	0.747906	0.977888	0.77393
Danio_rerio_newGene_20202	0.911294	0.404375	0.257141	0.377475	0.555301	0.195941
Danio_rerio_newGene_20205	0.921906	1.74074	0.863672	0.576941	0.155133	0.50795
Danio_rerio_newGene_20206	0.367712	0.369977	0.61697	0.066131	0.284508	0.722243
Danio_rerio_newGene_20208	3.26048	3.86888	3.36822	3.35511	3.55641	4.25082
Danio_rerio_newGene_20211	0	0.115218	0.0489875	0	0	0
Danio_rerio_newGene_20229	1.06367	1.31155	1.46898	0.619742	1.38427	0.665901
Danio_rerio_newGene_20234	0.414204	0.804024	0.661469	1.24393	0.664825	0.35746
Danio_rerio_newGene_20243	0.0246895	0.653844	0.615023	0.362356	0	0.316235
Danio_rerio_newGene_20252	1.08466	1.56602	0.982194	1.32072	1.24715	1.27787
Danio_rerio_newGene_20253	0.178625	0	0	0.0761585	0.455854	0
Danio_rerio_newGene_20254	0.563261	0.554454	0.546233	0.612385	0.576811	0.393798
Danio_rerio_newGene_2028	0.538492	0.478966	0.310809	0.744235	0.401126	0.416857
Danio_rerio_newGene_20281	0.335188	0.131459	0.669063	0.253328	0.310859	0.14504
Danio_rerio_newGene_20312	9.76422	9.01496	6.45852	7.82364	9.9091	9.34077
Danio_rerio_newGene_20313	6.9765	6.63345	6.28677	6.6161	7.24868	7.98743
Danio_rerio_newGene_20316	0.540858	0.778276	0.53099	0.569652	0.832408	0.938079
Danio_rerio_newGene_20330	0.439188	0.349252	0.523297	0.482474	0.403248	0.199602
Danio_rerio_newGene_20331	0.186643	0.108229	0.481788	0.209268	0.097924	0.169294
Danio_rerio_newGene_20337	0.0436445	0.404122	0.262356	0.234465	0	0.272508
Danio_rerio_newGene_20343	0	0.027885	0.0349205	0	0.07551	0.123198
Danio_rerio_newGene_20363	0.72275	0.248082	0.91718	0.456633	0.314225	0.348253
Danio_rerio_newGene_20365	1.5798	2.09852	1.86512	1.63708	1.21401	1.64965
Danio_rerio_newGene_20371	1.12228	1.27581	0.871047	0.971701	1.22908	0.567886
Danio_rerio_newGene_20381	0.598168	0.306381	0.270538	0.555943	0.203164	0.295822
Danio_rerio_newGene_20382	0.155692	0	0.149611	0	0.0502205	0.089394
Danio_rerio_newGene_20393	0.223142	0.29785	0.174839	0.123132	0.244195	0.237787
Danio_rerio_newGene_2040	0.217657	0.159054	0.389482	0.151108	0.129766	0.202968
Danio_rerio_newGene_20416	0.214739	0.302195	0.0907715	0.198341	0.030226	0.148179
Danio_rerio_newGene_20430	0.376304	0.753851	0.558571	1.02934	0.888386	1.748
Danio_rerio_newGene_20441	0.598764	0.501907	0.756193	0.907412	0.513011	0.274145
Danio_rerio_newGene_20446	0.22174	0.425322	0.414811	0.337561	0.257267	0.269645
Danio_rerio_newGene_20451	0.46461	0.26537	0.320746	0.422251	0.312379	0.22421
Danio_rerio_newGene_20458	1.5086	1.4791	1.34137	2.30522	1.94752	2.0826
Danio_rerio_newGene_20462	3.33369	1.22778	1.73607	0.937337	0.73462	0.842866
Danio_rerio_newGene_20477	21.3644	5.40835	20.9365	14.1055	13.8966	18.5908
Danio_rerio_newGene_20499	8.38395	13.6883	8.34568	8.85197	9.40643	7.84487
Danio_rerio_newGene_20505	0.0447775	0.488374	0.214583	0.264122	0.611152	0.16697
Danio_rerio_newGene_20530	4.22255	4.57415	3.93795	4.05978	3.51977	4.23188
Danio_rerio_newGene_20532	0.375695	0.153182	0.0816835	0.20836	0.149535	0.0968015
Danio_rerio_newGene_2054	0.249018	0	0.103184	0.035264	0	0
Danio_rerio_newGene_20548	11.2223	9.91111	12.1353	8.59947	11.3724	11.9632
Danio_rerio_newGene_2056	3.57644	1.47868	2.20547	2.50034	1.49218	1.50276
Danio_rerio_newGene_20563	0.451652	0.388817	0.367116	0.502497	0.224958	0.423704
Danio_rerio_newGene_20568	0.579368	0.555295	0.557243	0.298597	0.305076	0.467573
Danio_rerio_newGene_20569	0	0.212629	0.246066	0.375653	0.394309	0.160519
Danio_rerio_newGene_2059	0.499243	0.268097	0.246743	0.182348	0.209493	0.0355715
Danio_rerio_newGene_20615	2.02175	2.10272	1.17666	0.8853	0.727134	1.28648
Danio_rerio_newGene_20618	1.53914	1.43788	1.46831	1.49221	0.996541	1.55361
Danio_rerio_newGene_20619	7.67786	6.60388	7.04856	6.08039	5.72487	7.59466
Danio_rerio_newGene_2065	0.143971	0.604828	0.082362	0.439563	0.473064	1.0031
Danio_rerio_newGene_20664	9.84949	13.36	8.44868	10.3195	7.87181	11.5619
Danio_rerio_newGene_20680	1.70867	1.55027	1.96954	1.72246	3.22277	1.94545
Danio_rerio_newGene_2069	1.86579	2.47205	2.26533	2.08315	2.94129	2.49682
Danio_rerio_newGene_20706	0	0.0638955	0.247118	0	0	0
Danio_rerio_newGene_20716	0.24679	0.242866	0.270017	0.141032	0.030438	0.0949665
Danio_rerio_newGene_2073	0.847558	1.90197	0.468896	0.814682	1.47293	1.90364
Danio_rerio_newGene_20730	1.64623	1.28148	1.46147	1.31877	1.54576	2.31801
Danio_rerio_newGene_20750	2.39656	2.99421	1.95927	1.98591	1.17868	1.50796
Danio_rerio_newGene_20754	1.46605	1.618	1.7107	1.80428	1.24073	1.53895
Danio_rerio_newGene_20756	1.24818	1.60076	1.93684	2.01904	1.65104	1.82428
Danio_rerio_newGene_20758	2.47459	2.28883	1.09475	1.37412	1.14205	1.66679
Danio_rerio_newGene_2076	0.683142	0.743298	0.598336	0.939939	0.782147	0.785432
Danio_rerio_newGene_20760	0.461469	0.580825	0.378759	0.416068	0.419349	0.446313
Danio_rerio_newGene_20762	1.73616	2.63572	2.34958	2.92628	3.93335	3.08377
Danio_rerio_newGene_20763	1.45077	2.13936	1.57337	1.32815	1.40225	1.62795
Danio_rerio_newGene_20764	8.23082	7.33231	6.62942	6.60552	4.65737	4.84891
Danio_rerio_newGene_20772	2.13787	3.3362	2.31272	2.63802	3.15775	3.92911
Danio_rerio_newGene_20773	2.23515	2.49975	2.21449	2.08558	2.72856	2.64109
Danio_rerio_newGene_20774	5.3667	5.17486	5.1051	4.36359	4.84209	4.85669
Danio_rerio_newGene_20775	1.0941	1.2867	1.84853	2.28649	4.82178	2.84352
Danio_rerio_newGene_20786	0.361982	0.876146	0.332617	0.58583	1.08323	0.757086
Danio_rerio_newGene_20787	0.20615	0.106285	0.132988	0.209896	0.0555345	0.192291
Danio_rerio_newGene_20790	1.64533	2.46394	1.8706	1.87929	0.835451	1.89258
Danio_rerio_newGene_20794	1.12088	1.38104	1.16	1.17779	1.49155	1.59826
Danio_rerio_newGene_20799	1.29764	1.631	1.11196	1.33594	1.81261	2.03642
Danio_rerio_newGene_20800	0.671702	0.936646	1.0255	1.18208	1.04578	1.41416
Danio_rerio_newGene_20807	2.67337	3.17864	3.00447	3.17884	3.65361	3.5179
Danio_rerio_newGene_20810	0.467575	0.385492	0.531112	0.575858	0.387266	0.595199
Danio_rerio_newGene_20811	1.94472	2.17428	1.51668	1.48638	1.45417	1.80305
Danio_rerio_newGene_20815	7.88857	7.60788	6.54072	10.4604	6.97183	8.6525
Danio_rerio_newGene_20834	3.81387	6.68663	5.07207	5.92893	6.56923	7.12489
Danio_rerio_newGene_20841	1.11374	0.843118	0.723236	1.24906	1.27858	0.971751
Danio_rerio_newGene_20844	0.513772	0.382156	0.458897	0.422763	0.502387	0.298821
Danio_rerio_newGene_20850	0.86732	1.12353	1.24364	0.832251	1.37178	1.12901
Danio_rerio_newGene_20852	0.694151	1.63501	0.459967	0.80646	1.20366	1.4232
Danio_rerio_newGene_20853	3.22234	4.35047	3.36252	3.9231	4.20565	5.45429
Danio_rerio_newGene_20855	5.61945	5.04186	5.44743	5.72789	5.10841	7.19096
Danio_rerio_newGene_20856	3.72943	4.01357	3.45599	4.16899	5.2503	5.11517
Danio_rerio_newGene_20858	2.58107	2.86678	2.56342	2.64101	2.98819	2.80735
Danio_rerio_newGene_20861	1.07677	0.511512	0.790712	0.988389	0.809362	0.542083
Danio_rerio_newGene_20863	2.57006	3.60371	2.42681	3.57188	4.55967	4.27269
Danio_rerio_newGene_20867	0.874708	0.360425	0.42856	0.334566	0.410753	0.270511
Danio_rerio_newGene_20868	3.51296	3.00572	3.06562	3.61532	3.54551	3.61805
Danio_rerio_newGene_20869	3.63746	6.21437	3.62473	4.58677	5.96259	5.9703
Danio_rerio_newGene_20870	1.877	2.04625	1.74061	1.93036	2.215	1.91365
Danio_rerio_newGene_20871	1.81268	2.49057	2.82725	2.81171	2.6401	3.16889
Danio_rerio_newGene_20873	1.31925	1.96472	1.11197	1.00699	0.663985	1.19367
Danio_rerio_newGene_20874	11.5084	8.87715	8.43299	8.50809	9.67996	9.62589
Danio_rerio_newGene_20875	5.64424	5.27531	6.15869	6.07927	7.15434	5.58226
Danio_rerio_newGene_20879	0.25445	0.24221	0.167027	0.158343	0.193051	0.146395
Danio_rerio_newGene_20888	0.168898	0.165131	0.542569	0.387638	0.181873	0.391944
Danio_rerio_newGene_20889	2.28606	2.71373	2.63499	2.62707	3.05232	2.436
Danio_rerio_newGene_2089	1.45343	1.74044	1.32634	1.53218	1.81546	2.34717
Danio_rerio_newGene_20902	2.70646	3.74129	1.44276	2.44605	2.46291	2.37889
Danio_rerio_newGene_20904	1.39501	2.10878	0.785767	0.871359	1.90121	1.3176
Danio_rerio_newGene_2091	3.02322	2.21897	1.67591	2.34173	1.45895	2.02771
Danio_rerio_newGene_20912	3.59733	3.02857	3.75723	3.35755	3.53753	3.50104
Danio_rerio_newGene_20917	1.09065	1.50433	0.682347	0.956154	1.2921	1.45331
Danio_rerio_newGene_2092	1.71416	2.82217	1.90435	1.66673	1.6347	2.35699
Danio_rerio_newGene_20924	1.74342	2.25781	2.26367	1.8123	2.36397	2.08027
Danio_rerio_newGene_20927	2.4419	3.32304	2.51286	2.86257	3.42428	3.22477
Danio_rerio_newGene_20932	0.266929	0.460979	0.212821	0.044745	0.178498	0.425857
Danio_rerio_newGene_20950	0	0	0.032319	0.695226	0	0
Danio_rerio_newGene_20955	3.26078	3.18899	3.74688	3.16902	4.20755	3.87207
Danio_rerio_newGene_20959	0.212791	0.427318	0.164873	0.505104	0.164737	0.166724
Danio_rerio_newGene_20977	2.61079	2.02633	2.30178	2.36384	1.73086	2.36382
Danio_rerio_newGene_20979	1.86537	2.88599	1.96287	2.19949	2.48669	2.81086
Danio_rerio_newGene_20981	0.227796	0.470718	0.0197905	0.153066	0.226252	0.355978
Danio_rerio_newGene_20983	0.358648	0.345123	0.227175	0.390388	0.513876	0.0345625
Danio_rerio_newGene_210	0.152249	0.051158	0.116912	0.17554	0.042436	0.0392035
Danio_rerio_newGene_21005	0.60431	0.0685665	0.149116	0	0.341212	0.554576
Danio_rerio_newGene_21011	5.17641	6.18512	4.91904	4.73208	5.94586	7.59888
Danio_rerio_newGene_21025	0.511922	0.232799	0.043408	0.0823795	0.052814	0.34688
Danio_rerio_newGene_2103	1.15502	0.922341	1.32217	0.57114	0.928437	1.27546
Danio_rerio_newGene_21033	0.202518	0.195444	0.244788	0.317547	0.183385	0.408714
Danio_rerio_newGene_21045	0.887042	1.03105	0.76796	1.13626	1.12327	1.15521
Danio_rerio_newGene_21053	0.269215	0.213051	0.712412	0.566926	0.49764	0.28859
Danio_rerio_newGene_21054	0.163815	0.119946	0	0.0743925	0.0762135	0
Danio_rerio_newGene_21055	12.4523	14.7596	18.1335	18.6355	19.8866	20.1052
Danio_rerio_newGene_21071	5.95513	6.98358	6.61261	7.27138	7.82036	7.28083
Danio_rerio_newGene_21073	0.401523	0.269772	0.240793	0.309005	0.183063	0.262648
Danio_rerio_newGene_21098	0.409212	0.713617	0.261851	0.568183	0.409071	0.410201
Danio_rerio_newGene_21127	1.05245	0.1316	0.928306	0.476946	0.589986	0.371316
Danio_rerio_newGene_21149	0.169726	0.167972	0.049159	0.115108	0.098068	0.200565
Danio_rerio_newGene_21162	0.936816	0.731523	0.759219	0.855177	0.859225	0.707963
Danio_rerio_newGene_21182	0.217521	0.357391	0.329321	0.112709	0.51293	0.237702
Danio_rerio_newGene_21201	0.0361995	0.0506065	0.053588	0.197508	0.127266	0.091442
Danio_rerio_newGene_21202	0.057192	0.446917	0.0321585	0.0973195	0.0939285	0.188994
Danio_rerio_newGene_21224	4.98528	5.55194	5.97765	5.58217	10.9813	7.82867
Danio_rerio_newGene_21232	0	0.031375	0	0.042999	0.0587965	0.0498905
Danio_rerio_newGene_21233	1.21948	1.17104	0.353934	0.248547	1.03458	0.407416
Danio_rerio_newGene_21234	2.39811	3.20717	1.73468	2.57499	2.24956	3.03439
Danio_rerio_newGene_21249	0.508634	0.562473	0.332044	0.700562	0.595152	0.699151
Danio_rerio_newGene_21273	1.35404	1.49598	1.22715	1.17516	1.59528	1.81996
Danio_rerio_newGene_2128	5.40865	5.17605	4.94943	4.82706	4.4583	5.1428
Danio_rerio_newGene_21284	2.87287	3.41494	2.40063	2.611	3.4136	3.44561
Danio_rerio_newGene_2130	1.35612	0.455503	0.948983	0.413197	0.382158	0.54062
Danio_rerio_newGene_21326	1.10958	1.01909	1.07152	0.730839	0.910164	1.03434
Danio_rerio_newGene_21343	0	0	0	0	0	0
Danio_rerio_newGene_21350	0	0	0	0.033116	0	0
Danio_rerio_newGene_2136	0.994879	1.62862	1.08924	1.65192	2.42904	2.07552
Danio_rerio_newGene_21378	0.818731	0.163434	0.255198	0.083752	0.237578	0
Danio_rerio_newGene_21386	0.226047	0.0287475	0.132009	0.148154	0.128178	0.308724
Danio_rerio_newGene_21387	0.235909	0.245985	0.16617	0.228961	0.10644	0.161044
Danio_rerio_newGene_21391	0.201853	0.119085	0.156195	0.122748	0.114729	0.181524
Danio_rerio_newGene_21398	0.45282	0.619498	0.424892	0.210897	0.179859	0.628051
Danio_rerio_newGene_21408	0.468057	0.478572	0.186964	0.0997705	0.373939	0.643185
Danio_rerio_newGene_21419	0.638418	0.383756	0.373472	0.330923	0.481784	0.554701
Danio_rerio_newGene_21423	1.15308	1.57026	1.13823	1.26386	1.16179	1.33592
Danio_rerio_newGene_21435	0.347075	0.449317	0.35077	0.252677	0.342559	0.264883
Danio_rerio_newGene_21444	1.76493	1.28395	1.73703	1.90671	1.27453	1.78985
Danio_rerio_newGene_21450	0.518361	0.575019	0.491233	0.518231	0.484727	0.746012
Danio_rerio_newGene_21461	0.496696	0.587457	0.622294	0.760261	0.536561	0.632764
Danio_rerio_newGene_21477	0.20308	0.0812845	0.278661	0.27271	0.368814	0.27268
Danio_rerio_newGene_21491	0.151167	0.07182	0.084953	0.0886055	0.302651	0.256575
Danio_rerio_newGene_21504	0.0114685	0.260867	0.190327	0.820317	0.094165	0.0260055
Danio_rerio_newGene_21524	10.9041	12.6432	7.98524	8.12902	8.64401	8.83444
Danio_rerio_newGene_21540	1.62033	2.50395	2.13857	2.55998	2.88065	3.26229
Danio_rerio_newGene_21542	1.05556	1.60418	1.48495	1.9416	1.84952	2.07916
Danio_rerio_newGene_2155	0.154332	0.232644	0.308103	0.339507	0.129718	0.107048
Danio_rerio_newGene_21560	1.21073	0.928389	1.46298	1.66975	0.848094	0.920674
Danio_rerio_newGene_2157	1.31844	1.37103	0.292344	0.850886	0.767934	0.906914
Danio_rerio_newGene_21581	0	0	0.274541	0	0.068681	0
Danio_rerio_newGene_21586	1.19395	1.33277	1.20609	1.51587	1.52924	1.72721
Danio_rerio_newGene_21592	2.00058	2.60634	0.94767	0.908401	2.28187	3.29261
Danio_rerio_newGene_21606	0	0.182128	0.0474125	0	0.186984	0
Danio_rerio_newGene_21660	1.69034	2.44823	2.52599	2.36815	2.51936	2.91595
Danio_rerio_newGene_21670	0.731511	0.747058	0.724525	0.593099	0.754291	0.694074
Danio_rerio_newGene_21672	1.19298	2.30241	2.46055	2.44733	2.32244	1.80881
Danio_rerio_newGene_21692	0.646938	0.961294	0.712244	0.937195	0.918938	0.911544
Danio_rerio_newGene_21697	4.2022	6.09374	4.72149	5.29803	4.83246	4.49013
Danio_rerio_newGene_21699	0.235056	0.0588495	0.136932	0.272905	0.184748	0.105785
Danio_rerio_newGene_21708	4.36923	4.5876	3.69018	4.62521	4.09487	4.42281
Danio_rerio_newGene_21713	2.04353	2.46903	2.5596	2.55435	2.93613	2.74541
Danio_rerio_newGene_21714	2.19434	2.75241	2.54892	2.59101	2.81179	2.49347
Danio_rerio_newGene_2172	3.66878	2.74157	3.96429	4.79029	4.25172	4.65854
Danio_rerio_newGene_21748	3.68174	2.18027	1.32132	1.6171	1.11802	1.38537
Danio_rerio_newGene_21763	0.73755	1.77729	1.00684	1.17942	1.18339	1.58376
Danio_rerio_newGene_2177	1.45423	1.79295	1.84261	1.47965	1.66157	1.70976
Danio_rerio_newGene_21780	2.73277	3.35204	2.80613	5.83092	6.15884	5.61853
Danio_rerio_newGene_2179	2.86013	2.62175	2.10698	2.19526	2.82213	2.81902
Danio_rerio_newGene_21806	5.0512	4.45595	3.94158	4.68075	4.95425	4.91132
Danio_rerio_newGene_2181	13.5777	15.8203	12.4124	14.5753	18.2079	18.1224
Danio_rerio_newGene_21813	1.68973	1.09067	1.06503	1.712	1.24745	1.24885
Danio_rerio_newGene_21815	17.1811	23.5943	16.7538	14.3899	15.2094	20.3541
Danio_rerio_newGene_21817	0.298635	0.37411	0.234966	0.437308	0.522389	0.571056
Danio_rerio_newGene_21819	0.37214	0.71584	0.394617	0.416025	0.497518	0.351907
Danio_rerio_newGene_21820	1.06026	1.09687	1.24431	0.946682	0.674851	0.929652
Danio_rerio_newGene_21821	0.627467	0.239377	0.547682	0.263827	0.292343	0.30658
Danio_rerio_newGene_21825	0	0.408172	0.0474025	0.092364	0	0.156459
Danio_rerio_newGene_21826	0.124599	0.403503	0.355325	0.36493	0.42306	0.15564
Danio_rerio_newGene_21828	0	0.545478	0	0.42908	0.0643595	0
Danio_rerio_newGene_21829	1.09254	1.40809	0.895306	1.04603	1.15822	0.809705
Danio_rerio_newGene_21845	2.14355	2.40331	1.58404	2.04553	3.05306	2.91057
Danio_rerio_newGene_21846	0.263779	0.398411	0.239908	0.328013	0.152458	0.189732
Danio_rerio_newGene_21847	0.274326	0.045532	0.114106	0.157639	0.175169	0.304528
Danio_rerio_newGene_21850	0.227414	0.364987	0.164547	0.733298	0.441037	0.417273
Danio_rerio_newGene_21853	20.7048	15.667	22.0984	15.8501	22.8138	21.7374
Danio_rerio_newGene_21856	8.17827	7.49464	12.9721	13.2592	12.2363	16.6149
Danio_rerio_newGene_21857	9.04728	10.1793	13.9524	16.0352	17.1722	17.9136
Danio_rerio_newGene_21858	0.336084	0.188612	0.206556	0.411305	0.205046	0.228319
Danio_rerio_newGene_21864	0.015684	0.274583	0.210151	0.425624	0.155339	0.33648
Danio_rerio_newGene_21882	0.016767	0.389287	0.143411	0.196858	0.0728705	0.462166
Danio_rerio_newGene_21897	0.507582	0.709539	0.691987	2.27747	0.790909	0.727309
Danio_rerio_newGene_21898	0	0	0	0.052783	0.220314	0
Danio_rerio_newGene_21899	0	0	0	0	0	0
Danio_rerio_newGene_21904	0	0.28481	0.224901	1.50022	0	0.004474
Danio_rerio_newGene_21907	0.497371	0.515788	0.139982	0.471446	0.341088	0.280461
Danio_rerio_newGene_21918	0.307381	0.449665	0.253238	0.226807	0.197753	0.295669
Danio_rerio_newGene_21929	0.213537	0.404378	0.161091	0.546837	0.568329	0.330651
Danio_rerio_newGene_21932	0.450539	0.489524	0.137412	0.213921	0.465221	0.657108
Danio_rerio_newGene_21946	0.0964475	0.927994	0	0.0459965	0.816833	0.042458
Danio_rerio_newGene_21950	0.04046	0.107118	0.0546965	0.089815	0.0615365	0.199043
Danio_rerio_newGene_21952	0.729789	0.570477	0.847622	0.423888	0.580879	0.547048
Danio_rerio_newGene_21962	0.470842	0.689674	0.547002	0.564731	0.422652	0.50618
Danio_rerio_newGene_2197	0.244203	0.349875	0.102755	0.584888	0.354123	0.385277
Danio_rerio_newGene_21977	0.539843	1.77326	0.660463	1.04187	1.44168	1.48699
Danio_rerio_newGene_21979	0	2.39981	0.361329	1.24456	1.39335	1.45486
Danio_rerio_newGene_21986	25.0207	20.7808	18.0884	12.2573	9.36273	14.5693
Danio_rerio_newGene_22012	0	0	0	0	0	0.180989
Danio_rerio_newGene_22017	0.351984	0.350997	0.404516	0.357219	0.213357	0.411536
Danio_rerio_newGene_22019	0.197124	0.234841	0.241057	0.472442	0.261082	0.304891
Danio_rerio_newGene_2202	26.1818	27.2334	30.9374	32.9316	32.6426	32.1968
Danio_rerio_newGene_22023	0.352889	0.755575	0.181634	1.55938	0.915223	0.842912
Danio_rerio_newGene_22044	0.468164	0.729745	0.260967	0.414643	0.366482	0.849984
Danio_rerio_newGene_2206	2.73037	3.12586	2.40101	2.2797	2.62104	3.70305
Danio_rerio_newGene_2208	3.82489	4.42397	4.68109	5.82758	3.70406	4.38841
Danio_rerio_newGene_2210	7.48269	8.64182	10.9097	12.6213	10.7782	11.7529
Danio_rerio_newGene_22102	4.90036	4.42739	4.75825	2.83819	6.29356	4.92118
Danio_rerio_newGene_22111	0.705639	1.24289	0.802941	0.969292	1.05866	1.25778
Danio_rerio_newGene_22118	0.122167	0.103562	0.075358	0.142956	0.0912235	0.032487
Danio_rerio_newGene_22130	0.253605	0.09474	0.258148	0.160571	0.056199	0.0720015
Danio_rerio_newGene_22134	0.115682	0.119971	0	0.269232	0.247577	0.121322
Danio_rerio_newGene_22138	0.346986	0.348106	0.384162	0.613819	0.617484	0.655974
Danio_rerio_newGene_22146	0.275586	0.216032	0.153775	0.085041	0.069548	0.290278
Danio_rerio_newGene_2215	1.85258	1.93045	1.35341	2.06713	1.62752	2.10444
Danio_rerio_newGene_2216	5.40316	6.89072	7.40082	6.97803	7.19697	8.82474
Danio_rerio_newGene_22160	0.0740445	0.470577	0.541195	0.275481	0.0957895	0.308608
Danio_rerio_newGene_2217	6.43651	6.66275	5.57523	5.46543	7.08207	7.04711
Danio_rerio_newGene_22173	7.94698	8.9701	6.52847	6.01083	6.69937	7.37158
Danio_rerio_newGene_22177	0.136614	0.157861	0.322917	0.389382	0.176638	0.16615
Danio_rerio_newGene_22178	12.1247	13.4212	11.1985	11.7154	13.3012	12.4559
Danio_rerio_newGene_2218	6.18983	6.83992	6.91249	7.28355	8.45703	8.12743
Danio_rerio_newGene_22180	0	0	0.620335	0	0.328269	0
Danio_rerio_newGene_22182	0.7855	0.570959	0.554202	0.547871	0.0842075	0.940905
Danio_rerio_newGene_22196	5.72375	3.40916	3.17142	4.72012	2.42544	4.60499
Danio_rerio_newGene_22199	1.31997	1.36868	1.22437	1.28577	0.912693	0.993696
Danio_rerio_newGene_222	1.46308	2.29681	1.68911	1.73468	1.90624	2.08471
Danio_rerio_newGene_2220	2.03065	1.7823	1.61027	1.71664	2.1495	2.34406
Danio_rerio_newGene_22208	1.38025	0.877918	1.11669	1.16235	1.20565	1.20153
Danio_rerio_newGene_22211	1.61266	2.87537	2.92099	3.54578	3.82233	3.78808
Danio_rerio_newGene_22212	0.028042	0.0351735	0.060406	0.279438	0	0
Danio_rerio_newGene_22214	20.2997	17.2299	18.8159	18.0645	19.6238	21.5695
Danio_rerio_newGene_22219	7.45615	8.43269	9.42013	8.60114	8.4436	10.28
Danio_rerio_newGene_2222	2.23827	2.71019	2.4241	2.41247	2.40428	2.89401
Danio_rerio_newGene_22228	8.72446	11.3851	10.5497	11.0542	10.3502	10.0945
Danio_rerio_newGene_22229	0.558833	0.366253	0.601514	0.747529	1.38696	1.02893
Danio_rerio_newGene_2223	3.9922	4.36214	4.81101	3.91556	5.29118	5.40841
Danio_rerio_newGene_22230	2.58442	3.05705	2.82625	2.25573	2.85483	4.25265
Danio_rerio_newGene_22231	2.74826	2.41597	2.09383	2.67759	2.99836	2.98769
Danio_rerio_newGene_22233	0.765885	1.28317	0.713392	1.38576	1.43484	2.19164
Danio_rerio_newGene_22235	7.31919	8.58947	7.40442	9.79158	9.37055	11.5436
Danio_rerio_newGene_22241	0.0620135	0.232617	0.0160725	0.118899	0	0
Danio_rerio_newGene_22246	2.33886	3.60473	1.90819	2.5464	2.53661	3.22063
Danio_rerio_newGene_22248	0.138761	0.488134	0.228109	0.648174	0.237948	0.0651375
Danio_rerio_newGene_22251	0.969505	0.635925	0.672359	0.719396	0.496703	0.582193
Danio_rerio_newGene_22258	3.1076	2.56943	2.52157	2.23262	3.75951	3.4499
Danio_rerio_newGene_22259	1.44628	1.55339	1.39022	2.00229	2.81095	2.86303
Danio_rerio_newGene_2228	4.79875	2.37069	3.36374	2.34073	2.46993	3.24648
Danio_rerio_newGene_22282	0.402255	0.393951	0.376903	0.658624	0.344351	0.550698
Danio_rerio_newGene_22284	1.27535	1.62567	0.84345	1.55937	1.70683	1.3045
Danio_rerio_newGene_22296	2.38181	2.75038	2.68029	2.62576	3.45388	3.31045
Danio_rerio_newGene_223	3.8806	4.88675	3.52162	3.57761	4.39958	4.44938
Danio_rerio_newGene_22304	0.288075	0.738825	0.615323	0.902575	0.888351	0.378458
Danio_rerio_newGene_22305	2.13293	1.80014	2.82997	2.53726	3.5026	2.61484
Danio_rerio_newGene_22307	6.74749	5.30049	5.7609	6.34242	6.90284	5.0904
Danio_rerio_newGene_22310	3.73142	3.68844	2.98232	2.88685	2.82459	2.84876
Danio_rerio_newGene_22311	0.340222	0.380928	1.02283	1.05149	0.643655	0.387221
Danio_rerio_newGene_22320	1.79279	2.00011	1.83797	1.83906	1.59307	1.80189
Danio_rerio_newGene_22322	1.14974	1.11454	0.716384	0.931206	1.0073	0.932983
Danio_rerio_newGene_22323	12.2478	15.2508	22.3946	28.9187	27.0018	32.8324
Danio_rerio_newGene_22326	0.0477635	0	0	0.0486125	0	0.208669
Danio_rerio_newGene_22327	0.369625	0.0652985	0.125173	0.204608	0.288332	0.126758
Danio_rerio_newGene_22332	1.75313	0.987046	0.231301	0.133581	0.443628	0.457469
Danio_rerio_newGene_22335	0.511887	0.917667	0.788888	0.735134	0.604465	0.489853
Danio_rerio_newGene_22347	1.57021	1.48546	1.34594	1.13276	0.892329	0.715531
Danio_rerio_newGene_22349	1.48168	0.699016	1.6953	1.08218	1.03178	0.696605
Danio_rerio_newGene_22350	0.0771415	0	0.018391	0.263639	0.124564	0.438122
Danio_rerio_newGene_22352	1.7288	1.93792	2.34857	1.8869	2.24399	2.50344
Danio_rerio_newGene_22353	2.97719	2.60868	2.50931	2.40454	2.40993	2.52983
Danio_rerio_newGene_22364	2.36662	1.04722	1.97738	1.65554	1.92501	1.82997
Danio_rerio_newGene_22365	0.676994	0.565608	0.510212	0.46161	1.07906	1.06601
Danio_rerio_newGene_22368	0.722321	1.28503	0.887466	0.54615	0.793203	1.19788
Danio_rerio_newGene_22369	12.2374	13.1724	14.4446	14.2291	18.3245	17.1113
Danio_rerio_newGene_22370	3.1665	4.11833	3.87414	3.56154	5.38587	3.86424
Danio_rerio_newGene_22371	7.19373	3.8551	3.13841	3.19126	2.59585	2.81888
Danio_rerio_newGene_22372	1.39576	1.81418	1.7994	1.56979	1.44696	1.13918
Danio_rerio_newGene_22377	2.03785	3.63013	2.48136	3.34296	4.6205	3.53037
Danio_rerio_newGene_22378	9.76665	10.3432	7.77976	9.11754	7.12241	9.38881
Danio_rerio_newGene_22379	1.3112	1.21253	1.41844	2.36801	0.80232	1.30864
Danio_rerio_newGene_22380	0.0586845	0.0339145	0.024305	0.383339	0	0
Danio_rerio_newGene_22381	0.04401	0.107458	0.237859	0.0378235	0.0425025	0
Danio_rerio_newGene_22390	6.65003	6.89445	7.28513	6.29334	5.82211	6.71515
Danio_rerio_newGene_22398	0.429854	1.11435	0.991708	0.815701	0.333683	0.879337
Danio_rerio_newGene_22408	1.90107	1.84787	1.9097	2.05696	1.94622	1.84065
Danio_rerio_newGene_22411	1.8529	2.00578	1.6243	1.50862	2.07524	2.99701
Danio_rerio_newGene_22414	2.40949	2.64376	2.05016	2.09196	2.08281	2.10376
Danio_rerio_newGene_22417	1.88503	3.65597	2.19044	3.83692	4.18019	3.98482
Danio_rerio_newGene_22418	250.803	276.269	234.294	244.559	84.9314	143.144
Danio_rerio_newGene_22426	4.95211	4.23099	4.71421	4.55925	3.68391	5.95475
Danio_rerio_newGene_22427	3.54392	3.99069	5.14526	5.86421	6.33409	5.44875
Danio_rerio_newGene_22428	4.83723	4.72139	5.81447	6.35445	5.3068	7.4738
Danio_rerio_newGene_22430	5.30702	5.39211	8.59703	7.81075	7.66055	7.36014
Danio_rerio_newGene_22431	0.959824	0.586262	0.850391	0.807725	1.3257	1.01593
Danio_rerio_newGene_22432	2.11808	2.40918	1.78987	1.43424	1.77057	3.05349
Danio_rerio_newGene_22435	0	0.0618975	0	0.0435735	0	0
Danio_rerio_newGene_22447	1.03044	0.780109	1.87489	1.18083	1.57786	1.46483
Danio_rerio_newGene_22452	0.056494	0.158698	0	0.064323	0.149512	0.049773
Danio_rerio_newGene_22455	2.78257	2.46543	1.60259	1.89613	1.79217	2.16305
Danio_rerio_newGene_22458	3.69648	4.28839	4.9931	4.70933	4.41294	5.01311
Danio_rerio_newGene_22466	7.97956	9.45229	8.27791	8.71079	11.8079	11.8184
Danio_rerio_newGene_22473	1.20322	1.26283	0.838383	1.31604	1.12827	1.24309
Danio_rerio_newGene_22474	0.107961	0.188033	0	0	0	0
Danio_rerio_newGene_22476	0.201649	0	0	0.117968	0	0
Danio_rerio_newGene_22477	0.337379	0.308348	0.172933	0.133216	0.3505	0.277124
Danio_rerio_newGene_22479	0.321766	0.163473	0.0643845	0.221702	0.191499	0.0478295
Danio_rerio_newGene_22481	2.33652	1.89316	1.32706	1.77455	2.35566	3.57618
Danio_rerio_newGene_22482	1.03742	0.706832	0.977723	0.915337	0.794926	0.705016
Danio_rerio_newGene_22486	4.32065	4.15571	3.75609	3.41454	4.17235	4.02354
Danio_rerio_newGene_22487	25.5855	22.3922	22.9719	23.9337	19.448	20.295
Danio_rerio_newGene_22502	0.224865	0.343035	0	0.442185	0.217717	0
Danio_rerio_newGene_22510	0.269392	0.397133	0.218489	0.329589	0.319067	0.532861
Danio_rerio_newGene_22512	4.5262	6.02387	4.50281	7.50316	7.77143	7.18661
Danio_rerio_newGene_22517	17.0665	16.9164	20.586	22.2848	21.4841	22.0223
Danio_rerio_newGene_22520	1.52802	1.79427	2.4307	2.13353	2.4583	1.62826
Danio_rerio_newGene_22521	0.836431	1.04876	0.892825	1.02534	0.924967	0.942017
Danio_rerio_newGene_22525	0.290782	0.261528	0.163919	0.247999	0.312276	0.336361
Danio_rerio_newGene_22526	0	0.503567	0.496318	0.628963	0.065163	0.0461855
Danio_rerio_newGene_22528	1.72184	1.87275	1.3515	2.51943	1.7522	2.00115
Danio_rerio_newGene_22531	1.47703	1.22592	1.31276	1.1538	1.01819	1.04408
Danio_rerio_newGene_22534	8.08819	8.70152	9.06509	8.94063	8.59063	9.17928
Danio_rerio_newGene_2254	1.89513	2.08406	2.04524	1.91426	1.40814	2.01988
Danio_rerio_newGene_22540	1.49764	1.87556	1.67698	1.35718	1.36456	1.43055
Danio_rerio_newGene_22543	1.69322	2.21289	1.98837	1.89886	1.92718	1.7243
Danio_rerio_newGene_22545	2.79598	3.99516	3.45222	4.48771	4.90375	4.36837
Danio_rerio_newGene_22548	2.83528	3.01344	3.71431	2.93999	2.83514	3.20106
Danio_rerio_newGene_22553	0.344558	0.725634	0.563095	0.240159	0.494603	0.791795
Danio_rerio_newGene_22574	1.42433	1.56842	1.43144	1.50048	1.3919	1.03962
Danio_rerio_newGene_22582	1.16986	1.7649	1.93184	2.61088	1.59791	2.66029
Danio_rerio_newGene_22583	0.412353	0.288568	0.7335	0.386373	0.614845	0.460526
Danio_rerio_newGene_22587	0.529085	0.310194	0.72406	0.094415	0.556867	0.0777845
Danio_rerio_newGene_22588	2.90598	3.37388	2.70355	2.77017	3.18579	3.3284
Danio_rerio_newGene_22590	0.338381	0	0.0549555	0.0737915	0.272072	0.276384
Danio_rerio_newGene_22592	1.33533	1.60649	1.73736	0.951766	1.63241	1.13505
Danio_rerio_newGene_22596	1.52686	2.07564	1.13404	1.72279	1.78943	2.12217
Danio_rerio_newGene_22602	0.439474	0.606653	0.417918	0.56943	0.425322	0.23466
Danio_rerio_newGene_22603	0.950438	1.09419	0.852201	0.441192	0.492206	0.394773
Danio_rerio_newGene_22611	0.0274625	0.0706345	0.0947045	0.047625	0	0.159893
Danio_rerio_newGene_22614	2.00631	3.83671	3.61451	2.78572	4.33039	3.8947
Danio_rerio_newGene_22618	5.46663	8.94612	2.71046	5.56862	6.55553	5.6768
Danio_rerio_newGene_2262	0	0	0	0	0	0
Danio_rerio_newGene_22620	0.280724	0	0.269036	0.602241	0.264614	0.149587
Danio_rerio_newGene_22621	2.83711	2.30242	2.25533	2.90863	3.55436	2.84134
Danio_rerio_newGene_22623	5.34874	4.96737	4.89472	5.55715	4.53104	6.24666
Danio_rerio_newGene_22626	0.11325	0.240176	0.227036	0.451841	0.111775	0.0453835
Danio_rerio_newGene_22634	6.3902	1.6912	2.62654	2.24752	1.65356	1.10512
Danio_rerio_newGene_22635	0.880307	1.01071	1.21238	0.632089	1.23367	1.22143
Danio_rerio_newGene_22636	0.280712	0.411582	0.702614	0.709611	0.533505	0.673196
Danio_rerio_newGene_22638	0.443806	0.588071	0.37586	0.504522	0.461946	0.321496
Danio_rerio_newGene_22653	0.142709	0.236506	0.051346	0.582198	0.393019	0.13844
Danio_rerio_newGene_22654	0.095184	0.142183	0.0772985	0.181648	0.244792	0.189879
Danio_rerio_newGene_22657	0.075855	0.144045	0.067579	0.0276575	0.117757	0.088919
Danio_rerio_newGene_22667	0.858904	0.79245	0.92575	1.07403	0.919085	1.39879
Danio_rerio_newGene_22670	53.3285	58.2735	79.6698	86.4607	85.822	70.1961
Danio_rerio_newGene_22673	3.37202	2.57377	4.54761	4.05265	4.54682	4.07095
Danio_rerio_newGene_22674	4.2873	3.9652	4.59061	4.69666	4.80336	5.1202
Danio_rerio_newGene_22675	2.53771	2.3513	3.66097	2.86853	2.98232	2.99153
Danio_rerio_newGene_22676	9.7133	7.53896	5.15163	5.64626	7.00444	7.60774
Danio_rerio_newGene_22684	0.414461	0.29362	0.571263	1.08698	0.606907	0.413724
Danio_rerio_newGene_22687	0.837063	1.14135	0.752707	0.423264	0.621853	0.785197
Danio_rerio_newGene_22690	0.622823	0.205147	0.10752	0.407315	0.170304	0.145883
Danio_rerio_newGene_22712	0.987459	0.686251	0.970645	1.86334	1.18184	0.486331
Danio_rerio_newGene_22714	1.56647	1.39722	0.954446	1.47055	1.30117	1.9449
Danio_rerio_newGene_22715	1.31975	1.16371	0.517738	0.37536	0.906455	1.4041
Danio_rerio_newGene_22724	1.05548	0.448626	0.975264	1.25675	0.398443	0
Danio_rerio_newGene_2273	0.504044	0.546119	0.455064	0.223828	0.358588	0.420106
Danio_rerio_newGene_22730	1.34947	0.994335	1.03796	1.1618	0.94051	1.25793
Danio_rerio_newGene_22732	0.277828	0.312866	0.0929055	0.145947	0.0317995	0.176902
Danio_rerio_newGene_22743	2.51738	4.40723	2.0181	3.13067	2.8149	3.67379
Danio_rerio_newGene_22744	1.1902	1.19005	1.04013	1.17043	1.36703	1.28189
Danio_rerio_newGene_22748	1.19997	1.72215	0.646436	1.43871	1.12418	1.49881
Danio_rerio_newGene_22754	12.5167	12.1508	11.956	12.2309	12.7601	13.4877
Danio_rerio_newGene_22755	1.41081	2.57574	2.0048	2.28832	2.55457	2.79335
[truncated: 1,448 more rows]

## Sheet: Supplementary Table S2
Supplementary Table S2. Expression profiles of zebrafish larval transcripts under LL condition.
	WTLL120_FPKM	WTLL124_FPKM	WTLL128_FPKM	WTLL132_FPKM	WTLL136_FPKM	WTLL140_FPKM
Danio_rerio_newGene_1	2.30464	2.24286	2.13097	2.54714	2.60905	2.64613
Danio_rerio_newGene_10	2.98948	2.64221	2.55523	1.91953	1.83126	1.89348
Danio_rerio_newGene_10000	0.77198	0.583407	0.536871	0.755846	0.385551	0.386541
Danio_rerio_newGene_10003	1.07959	0.894212	0.581032	0.478868	0.371841	0.206713
Danio_rerio_newGene_10014	0	0.457437	0.296615	0.34216	0.205541	0.0669845
Danio_rerio_newGene_10015	0.35187	0.814523	0.566998	1.06253	0.642544	0.511778
Danio_rerio_newGene_10018	0.922092	0.28133	0.698886	0.995561	0.744293	0.873492
Danio_rerio_newGene_10024	0.678443	0.754728	0.353923	0.085167	0.222404	0.618874
Danio_rerio_newGene_10030	1.98349	1.37604	1.0407	1.09264	1.3983	0.799422
Danio_rerio_newGene_1004	0.0388935	0.134654	0.0610755	0.12313	0.155987	0
Danio_rerio_newGene_10040	3.11201	3.4622	2.53981	2.798	2.95789	1.64744
Danio_rerio_newGene_10044	0.16589	0.0509485	0.598097	0.381112	0.329072	0.625429
Danio_rerio_newGene_10046	1.23984	1.01061	1.0864	0.780697	1.00377	0.821999
Danio_rerio_newGene_10050	1.46086	1.37371	1.9905	1.97868	1.92935	1.47398
Danio_rerio_newGene_10051	0	0.266193	0.571759	0.191639	0.315128	0.073923
Danio_rerio_newGene_10056	1.14218	1.25048	1.1469	1.48699	0.718476	0.417331
Danio_rerio_newGene_10058	0.196958	0.276055	0.152745	0.0402225	0.032976	0.48606
Danio_rerio_newGene_10065	5.67455	7.54981	5.16889	4.49793	6.71192	6.23909
Danio_rerio_newGene_10066	0	0.0155335	0.243428	0.117193	0	0
Danio_rerio_newGene_10067	3.00192	2.50436	2.30289	2.54707	2.33553	2.64322
Danio_rerio_newGene_10070	0	0.162375	0	0.213727	0.024881	0.228455
Danio_rerio_newGene_10071	0.324507	0.0438395	0.138064	0.090489	0.110339	0.0219625
Danio_rerio_newGene_10074	1.33698	1.18215	1.72771	1.18117	1.30895	0.756667
Danio_rerio_newGene_10075	0.228135	0.059569	0.297797	0.0321995	0	0.228977
Danio_rerio_newGene_10081	0.438228	0.748702	0.677825	0.506896	0.445431	0.437441
Danio_rerio_newGene_10082	1.95893	1.79964	1.64886	1.27555	1.41626	1.29364
Danio_rerio_newGene_10084	1.76889	1.84768	1.83623	1.82894	1.40362	1.41232
Danio_rerio_newGene_10086	0.134346	0.20528	0.101948	0.178122	0	0
Danio_rerio_newGene_10100	4.01228	4.74359	4.59608	5.33431	6.54366	5.18647
Danio_rerio_newGene_10102	0.184113	0.290403	0.132398	0.588431	0.256644	0.177117
Danio_rerio_newGene_10104	0	0.041972	0	0	0.041706	0
Danio_rerio_newGene_10105	0.48899	1.05546	0.420937	0.2152	0.09778	0.257644
Danio_rerio_newGene_10106	0.363723	0.357733	0.264679	0.516054	0.394776	0.488884
Danio_rerio_newGene_10108	0.595577	0.484976	0.386033	0.169162	0.294976	0.406702
Danio_rerio_newGene_10120	1.15051	1.77415	1.65693	2.06964	1.88693	1.41566
Danio_rerio_newGene_10135	0.227879	1.1171	0.943389	0.333069	0	0.221874
Danio_rerio_newGene_10140	0.392585	0.188871	0	0.35195	0	0
Danio_rerio_newGene_10146	28.2483	31.4209	25.7942	29.8914	37.1183	25.5145
Danio_rerio_newGene_10162	0.754675	1.25591	0.999308	0.957506	1.97252	1.4816
Danio_rerio_newGene_10170	1.95402	1.57294	1.21567	1.26904	1.10957	0.93812
Danio_rerio_newGene_10173	0.101356	0.267697	0.268163	0.204228	0.353075	0.074549
Danio_rerio_newGene_10188	0.442001	0.111971	0.210778	0.1213	0.231916	0.176855
Danio_rerio_newGene_10189	1.75126	1.58954	0.884524	0.81035	0.690921	1.22116
Danio_rerio_newGene_10197	1.49162	1.87811	1.94387	2.05685	2.58497	2.25641
Danio_rerio_newGene_10198	0.208584	0.185053	0.116975	0.155063	0.219333	0.124089
Danio_rerio_newGene_10221	0	0	0	0.371058	0	0.0419945
Danio_rerio_newGene_10241	2.78856	2.95437	2.50271	2.86079	3.60904	2.97408
Danio_rerio_newGene_10246	6.14267	6.51399	4.86428	5.24634	5.98226	5.31496
Danio_rerio_newGene_10274	0.127188	0.145489	0.110942	0.16772	0.118182	0
Danio_rerio_newGene_10318	1.90556	2.06807	2.02372	1.94677	2.85082	2.34385
Danio_rerio_newGene_10332	0.937332	0.853879	1.19236	0.869425	0.740577	0.895751
Danio_rerio_newGene_10337	7.6519	8.85693	8.32287	8.38923	10.5126	10.835
Danio_rerio_newGene_10350	0.555329	0.670486	0.708197	0.692144	0.572814	0.389078
Danio_rerio_newGene_10352	0.955226	0.760333	0.637849	0.750552	0.899137	0.454846
Danio_rerio_newGene_10372	0.47367	0.542507	0.571875	0.782863	0.839627	0.632062
Danio_rerio_newGene_10394	0.100723	0.270811	0.0637355	0.641398	0.127244	0.27214
Danio_rerio_newGene_10405	0.238831	0.192231	0.537349	0.219165	0.257674	0.155735
Danio_rerio_newGene_10406	0.677589	0.669324	0.698174	0.402489	0.589657	0.714496
Danio_rerio_newGene_10413	0.339126	0	0.174862	0.207827	0.220049	0
Danio_rerio_newGene_10449	0.793085	1.36724	1.24556	1.07646	0.693135	0.539179
Danio_rerio_newGene_10450	11.6187	13.9511	10.2032	7.34545	5.12481	2.62008
Danio_rerio_newGene_10457	0.197827	0.226847	0.328714	0.134747	0.501663	0.10415
Danio_rerio_newGene_10459	0.754741	1.03706	0.615025	1.14996	1.25149	1.51535
Danio_rerio_newGene_10462	0.24607	0.067839	0.135588	0.356633	0.162522	0.22937
Danio_rerio_newGene_10463	0.046738	0.148359	0.038383	0	0.0771265	0.0992955
Danio_rerio_newGene_10475	0.894618	0.731102	0.754571	0.43593	0.47472	0.412465
Danio_rerio_newGene_10506	0.456175	0.86519	1.1099	1.0948	0.928289	0.920272
Danio_rerio_newGene_10513	0	0.0577035	0	0.271428	0	0.340689
Danio_rerio_newGene_10517	8.63909	4.64909	7.57091	10.7103	1.77113	8.74588
Danio_rerio_newGene_10536	0.120897	0	0.12228	0	0.208022	0.561943
Danio_rerio_newGene_10537	0.611648	0.227412	0.038693	0.386598	0.413204	0.169501
Danio_rerio_newGene_10540	0.26619	0.379817	0.419971	0.320304	0.35054	0.321962
Danio_rerio_newGene_10541	0.312744	0.452198	0.451155	0.101333	0.28866	0.0150545
Danio_rerio_newGene_10553	2.555	2.52626	2.84486	2.78053	2.78387	2.07511
Danio_rerio_newGene_10559	20.8247	22.255	21.3362	21.0267	19.8277	27.9545
Danio_rerio_newGene_10570	0.258641	0.461657	0.285442	0.380851	0.496619	0.192876
Danio_rerio_newGene_10574	0.047949	0.145563	0.185353	0.317196	0.358353	0.276439
Danio_rerio_newGene_10589	0.53474	0.461339	0.488075	0.451096	0.466452	0.408809
Danio_rerio_newGene_10590	1.34638	1.92233	2.05047	2.29537	1.91185	0.922354
Danio_rerio_newGene_106	2.8872	2.95233	2.19615	1.813	2.44843	2.14872
Danio_rerio_newGene_10618	0.145547	0.206998	0.332143	0.170416	0.1159	0.196704
Danio_rerio_newGene_10622	0.369034	0.666239	0.27215	0.343601	0.70991	0.412737
Danio_rerio_newGene_10681	4.14973	4.5123	5.364	4.57704	6.6879	2.25499
Danio_rerio_newGene_10685	1.64518	1.74985	1.82787	1.59924	1.58382	0.589784
Danio_rerio_newGene_10686	0.62703	0.71061	0.731164	0.697164	1.27758	1.2502
Danio_rerio_newGene_10688	0.246115	0.320673	0.2473	0.348111	0.439349	0.138424
Danio_rerio_newGene_10697	0.380665	0.0564675	0.028303	0.173447	0	0.288413
Danio_rerio_newGene_107	6.12941	4.96687	4.13724	4.1064	3.63227	2.41536
Danio_rerio_newGene_10703	4.99657	7.15603	5.25403	4.27153	2.4575	2.00202
Danio_rerio_newGene_10711	4.81976	5.38332	4.47378	5.32938	6.43125	4.10928
Danio_rerio_newGene_10718	5.3811	6.29341	5.3911	5.3193	6.30261	7.04379
Danio_rerio_newGene_10722	0.0562555	0	0	0.140426	0	0.115083
Danio_rerio_newGene_10731	0.961752	0.902074	1.37517	0.747734	0.939272	0.830267
Danio_rerio_newGene_10732	2.72289	3.59124	4.65148	4.25717	4.83156	4.78785
Danio_rerio_newGene_10741	1.52328	1.73495	1.29701	1.451	1.01256	1.27265
Danio_rerio_newGene_10743	0.551303	0.553164	0.952956	0.86519	1.07598	0.784699
Danio_rerio_newGene_10746	2.93816	4.55104	3.09873	2.11824	2.44304	2.04768
Danio_rerio_newGene_10760	5.74011	7.15543	7.79258	7.85598	10.206	8.9467
Danio_rerio_newGene_10769	0.329697	0.47078	0.460247	0.524269	0.509641	0.38512
Danio_rerio_newGene_10771	1.60852	2.23873	1.87672	1.14579	1.91483	1.55773
Danio_rerio_newGene_10773	3.70256	3.25741	3.98254	3.00708	3.81343	3.10137
Danio_rerio_newGene_10774	5.55209	4.30038	5.66198	4.99728	4.93795	5.51103
Danio_rerio_newGene_10778	0.528419	0.894303	0.647365	0.604871	0.898404	0.577245
Danio_rerio_newGene_10781	7.89393	8.57411	6.44514	7.49669	7.89827	6.76869
Danio_rerio_newGene_10786	0.450187	0.219602	0.416773	0.259063	0.479403	0.409532
Danio_rerio_newGene_10788	1.56222	1.98454	2.44018	2.38561	2.99275	3.53915
Danio_rerio_newGene_10789	8.66801	8.5049	11.3764	12.7005	16.6469	9.20946
Danio_rerio_newGene_10791	1.58983	2.09475	2.21974	1.37716	1.70721	1.3474
Danio_rerio_newGene_10792	4.47837	4.35792	4.46041	3.98654	4.59421	3.87878
Danio_rerio_newGene_10802	6.35273	4.02478	4.62658	4.42976	5.14908	4.4548
Danio_rerio_newGene_10811	1.72855	1.13747	1.36241	2.21425	1.71476	1.88608
Danio_rerio_newGene_10813	3.08392	2.43347	2.68637	2.62841	3.54878	4.87875
Danio_rerio_newGene_10816	4.13392	5.44305	5.16216	5.21033	6.20255	3.74414
Danio_rerio_newGene_10821	0.81709	1.30749	0.767081	0.72322	1.05417	0.725177
Danio_rerio_newGene_10825	4.0012	4.41595	2.57141	4.1905	4.89467	4.2383
Danio_rerio_newGene_10827	0.475861	1.11172	0.805515	0.897377	1.13801	1.15262
Danio_rerio_newGene_10829	1.13525	1.5005	2.30899	1.90193	1.63046	1.50445
Danio_rerio_newGene_10834	0.924863	0.809931	0.816963	0.989571	0.701088	0.548009
Danio_rerio_newGene_10835	0.517286	0.843503	0.94003	0.948298	0.743403	0.791404
Danio_rerio_newGene_10837	0.616806	0.806889	0.78769	0.518196	0.642436	0.541397
Danio_rerio_newGene_10840	2.35341	2.39606	2.77374	2.39432	2.24762	3.46678
Danio_rerio_newGene_10842	0.207003	0.0201735	0	0.08715	0.132336	0
Danio_rerio_newGene_10843	0.154362	0.081516	0.191727	0.125425	0.100516	0.189096
Danio_rerio_newGene_10865	6.28665	6.28338	5.51527	6.6133	9.56806	6.28934
Danio_rerio_newGene_10866	0.218649	0.196165	0.215819	0.408891	0.0864335	0.136059
Danio_rerio_newGene_10880	0.737849	0.723624	1.22984	0.501989	0.582642	0.36365
Danio_rerio_newGene_109	2.88635	1.85917	3.29332	2.04441	3.19037	3.27017
Danio_rerio_newGene_10925	0.131821	0.321705	0.18559	0.168872	0.200247	0.091227
Danio_rerio_newGene_10927	1.31019	0.953734	0.768381	0.725878	0.663859	0.797009
Danio_rerio_newGene_10932	2.35581	2.76432	2.3807	2.34664	2.12921	2.58591
Danio_rerio_newGene_10934	0	0	0	0.10816	0	0
Danio_rerio_newGene_10937	0.200459	0.445543	0.177727	0.19596	0.260266	0.16538
Danio_rerio_newGene_10947	1.75552	1.62091	1.75306	1.69544	2.1786	1.31721
Danio_rerio_newGene_10950	0.613723	1.43746	0.631318	1.49808	0.528473	0.837793
Danio_rerio_newGene_10952	1.11568	1.6022	1.35651	2.24564	3.17225	1.30992
Danio_rerio_newGene_10954	0.736147	1.01311	0.945593	0.86175	1.49632	1.20567
Danio_rerio_newGene_10958	4.26743	4.18173	3.98306	4.95334	3.84712	2.8301
Danio_rerio_newGene_10959	0.162567	0	0.247116	0.0116585	0.165936	0.341126
Danio_rerio_newGene_10960	1.38911	1.63733	1.65886	1.3278	1.17892	1.3893
Danio_rerio_newGene_10961	0.354551	0.304419	0.233142	0.274976	0.340874	0.463896
Danio_rerio_newGene_10962	1.13394	0.872714	1.15101	0.971577	0.875729	1.16403
Danio_rerio_newGene_10965	2.40247	2.08735	2.82147	2.83185	1.2414	0.756259
Danio_rerio_newGene_10971	5.86109	4.85596	4.04698	3.64304	4.9434	0.577883
Danio_rerio_newGene_10972	0.0353695	0.171465	0.403216	0.0694265	0.120237	0.181632
Danio_rerio_newGene_10977	5.38269	4.77136	5.14505	4.73032	5.05027	4.58533
Danio_rerio_newGene_10988	0.493223	0.177161	0.327308	0.341709	0.33688	0.106932
Danio_rerio_newGene_10997	0.864136	1.27278	1.21195	1.12692	0.615939	0.946585
Danio_rerio_newGene_11	1.14223	1.75042	1.4217	1.59436	1.19641	1.02707
Danio_rerio_newGene_11000	0.246509	0.12756	0.153854	0	0.04376	0.346427
Danio_rerio_newGene_11003	0.0404465	0.039918	0	0	0	0
Danio_rerio_newGene_11008	2.00452	1.966	1.37063	2.15651	2.44827	2.2299
Danio_rerio_newGene_1102	0.174935	0	0.250945	0.558072	0.443787	0.505897
Danio_rerio_newGene_11020	0.0761835	0.382858	0.31933	0.491567	0.399045	0.123312
Danio_rerio_newGene_11024	0.254115	0.109344	0.243235	0.058618	0	0.0875745
Danio_rerio_newGene_1103	35.5742	53.2227	30.573	28.5325	45.585	22.2135
Danio_rerio_newGene_1109	0.107071	0.103591	0.373381	0.135002	0.087229	0.132386
Danio_rerio_newGene_11096	0	0	0.298389	0	0.0831015	0.0549895
Danio_rerio_newGene_111	1.27561	2.46922	1.61353	3.35277	4.0749	4.61842
Danio_rerio_newGene_11122	0.73273	0.471007	0.330161	0.128198	0.225614	0.305623
Danio_rerio_newGene_11144	5.15281	6.31101	4.33139	4.32655	4.72971	3.96273
Danio_rerio_newGene_11146	1.46303	2.09159	2.15843	2.24831	2.40868	3.18238
Danio_rerio_newGene_11148	0.39257	0.291961	0.262586	0.434955	0.21596	0.591387
Danio_rerio_newGene_11152	1.26816	1.62354	1.36132	1.41245	2.16443	1.70108
Danio_rerio_newGene_11154	3.17718	2.97691	2.43586	2.55859	2.81684	2.15226
Danio_rerio_newGene_11160	1.08774	1.65007	1.10099	0.823361	1.05978	0.644954
Danio_rerio_newGene_11161	0.306192	0.156046	0.260621	0.288681	0.524351	0.415643
Danio_rerio_newGene_11178	4.12133	5.43971	6.92699	5.55397	7.94282	3.83322
Danio_rerio_newGene_11188	0.29567	0.430821	0.25585	0.292544	0.280298	0.250648
Danio_rerio_newGene_11190	0.147152	0.139116	0	0.149704	0.0162395	0.095638
Danio_rerio_newGene_11197	1.29532	1.33938	1.10418	1.02019	0.855211	1.05428
Danio_rerio_newGene_11202	2.08286	3.45473	4.06189	3.96159	2.86078	2.63674
Danio_rerio_newGene_11212	6.57923	6.90291	6.84552	7.85157	7.92253	7.02413
Danio_rerio_newGene_11214	4.72595	5.62262	4.77724	5.11954	6.08105	3.52984
Danio_rerio_newGene_11217	0.294587	0.470455	0.326952	0.260958	0.308419	0.306816
Danio_rerio_newGene_11227	0.269224	0.408191	0.417594	0.343967	1.02936	0.46153
Danio_rerio_newGene_11233	0.232755	0.429463	0.172422	0.516284	0.153905	0.0403695
Danio_rerio_newGene_11241	0.361963	0.546256	0.0692685	0.224793	0	0.192984
Danio_rerio_newGene_11243	2.9312	2.82192	2.3199	2.76877	2.58122	2.45517
Danio_rerio_newGene_11260	0	0	0	0	0	0
Danio_rerio_newGene_11271	0.314333	0.657776	0.347546	0.711203	1.06949	0.375597
Danio_rerio_newGene_11291	0.113444	0.0564855	0.017873	0.080323	0.058133	0
Danio_rerio_newGene_113	4.57095	3.88611	2.07669	2.65673	3.21343	2.80682
Danio_rerio_newGene_11311	0.525138	0.60629	0.642861	0.798606	0.865322	0.408087
Danio_rerio_newGene_11314	0	0	0.492007	0.167489	0	0
Danio_rerio_newGene_11317	2.3499	2.38332	2.18995	2.21977	2.31683	2.59319
Danio_rerio_newGene_1134	0.419082	0.336116	0.569355	0.389867	0.173071	0.574911
Danio_rerio_newGene_1136	0.0361675	0.179451	0.030062	0.0869195	0.0419595	0.052453
Danio_rerio_newGene_11369	0.0737225	0.118532	0.248352	0.065008	0.078198	0.0291065
Danio_rerio_newGene_1139	2.77178	2.85733	2.04189	2.1972	2.60681	1.80185
Danio_rerio_newGene_11391	0.831101	1.08985	1.01846	0.891794	1.00111	0.720795
Danio_rerio_newGene_11408	0.0726055	0.38252	0.820067	0.389702	0.538875	0
Danio_rerio_newGene_1141	5.3757	6.22621	5.82128	5.73844	7.18875	8.11727
Danio_rerio_newGene_11416	1.07159	1.0736	1.4546	1.18054	0.948411	0.402424
Danio_rerio_newGene_1142	1.86465	2.06391	2.24459	2.14322	1.97341	1.9292
Danio_rerio_newGene_11427	0.138424	0.159608	0.386386	0.329161	0.558393	0.300882
Danio_rerio_newGene_1145	0.390103	0.57418	0	0	0.298919	0.314134
Danio_rerio_newGene_1146	0.592241	0.353164	0.460858	0.695791	0.471935	0.670663
Danio_rerio_newGene_11460	2.04274	2.93	2.23235	2.27685	2.81351	2.2546
Danio_rerio_newGene_1147	1.98619	1.95975	1.63601	2.09036	1.94479	1.88164
Danio_rerio_newGene_11479	0.498986	0.402682	0.349327	0.552185	0.611547	0.455857
Danio_rerio_newGene_11483	0.102458	0.363127	0.761858	0.690391	0.236717	0.066307
Danio_rerio_newGene_11485	0.426053	1.85673	2.29856	2.64742	1.49124	0.890417
Danio_rerio_newGene_11489	0	0.084409	0	0	0	0
Danio_rerio_newGene_1149	4.93645	4.81154	5.55748	4.64645	5.24306	5.29603
Danio_rerio_newGene_11493	1.14828	1.47635	1.40878	1.89374	3.11414	2.51547
Danio_rerio_newGene_11494	0.642751	0.911348	0.6926	0.557123	0.601318	0.463
Danio_rerio_newGene_11522	1.25255	1.17397	1.0575	1.17421	1.66993	0.991699
Danio_rerio_newGene_11526	0.78095	1.1858	0.890157	1.57343	1.90534	1.04093
Danio_rerio_newGene_11528	0.457022	0.770443	0.134387	0.690643	0.872413	0.698334
Danio_rerio_newGene_11535	0.181072	0.318881	0.519715	0.739823	0.72937	0.92172
Danio_rerio_newGene_11538	0	0.0674835	0.425339	0.283286	0.0736825	0
Danio_rerio_newGene_11539	2.7107	3.00456	2.38584	2.08769	1.78987	2.46843
Danio_rerio_newGene_11540	4.10985	4.04074	4.27044	4.29822	2.14412	2.313
Danio_rerio_newGene_11544	1.59115	1.68526	1.98228	2.56387	1.69169	1.30552
Danio_rerio_newGene_11547	0	0.60304	0	0.722163	0.407007	0
Danio_rerio_newGene_11548	0.356193	0.412801	0.431401	0.552322	0.370333	0.278261
Danio_rerio_newGene_1156	18.7641	20.4646	18.3658	18.3524	20.2647	21.99
Danio_rerio_newGene_11561	15.4789	13.5503	12.5624	12.2307	10.936	9.59176
Danio_rerio_newGene_11563	0.018757	0.046603	0.126742	0	0.170789	0.0756735
Danio_rerio_newGene_11582	0.342683	0.425776	0.466499	0.302574	0.349301	0.356078
Danio_rerio_newGene_11590	2.5701	2.77688	2.79564	2.13437	1.51757	1.50076
Danio_rerio_newGene_11595	0.135454	0.205944	0.142384	0.503828	0.255588	0.321531
Danio_rerio_newGene_11596	2.71336	2.71184	3.19023	2.97091	3.29752	2.97074
Danio_rerio_newGene_11607	0.090009	0.140315	0.195998	0.6767	0.230484	0.115879
Danio_rerio_newGene_11626	8.83375	8.38987	8.01191	7.39799	9.49187	6.37631
Danio_rerio_newGene_11632	0.040724	0.140185	0.118117	0	0.160652	0
Danio_rerio_newGene_11634	0.291702	0.26168	0	0.15543	0.272923	0.428368
Danio_rerio_newGene_11635	0.167231	0.104156	0.159822	0	0.0750975	0.264777
Danio_rerio_newGene_11654	7.07034	7.35216	8.52841	6.63285	5.99578	5.28488
Danio_rerio_newGene_11656	0.40762	0.1419	0.274373	0.0935155	0.0714535	0.310067
Danio_rerio_newGene_11657	0.145971	0.200449	0.341026	0.329296	0.255932	0.020773
Danio_rerio_newGene_11667	0.34678	0.553176	0.345452	0.442536	0.767382	0.474401
Danio_rerio_newGene_11671	4.97158	5.3351	4.78784	6.50942	4.32602	5.90293
Danio_rerio_newGene_11679	1.26171	1.10931	0.540076	0.779196	1.02664	1.40994
Danio_rerio_newGene_11682	1.03409	1.35586	0.992378	1.05035	1.58988	1.15501
Danio_rerio_newGene_1169	0.76242	0.840067	0.775203	0.80741	1.34311	0.899952
Danio_rerio_newGene_11691	0.202178	0.50523	1.09504	0.302653	0.364425	0.57893
Danio_rerio_newGene_11698	3.1707	3.7633	4.04118	3.51046	4.6053	4.88909
Danio_rerio_newGene_11703	1.98934	1.7251	1.66843	1.58995	2.1749	1.15152
Danio_rerio_newGene_11707	0.160024	0.235988	0.353633	0.533486	0.264261	0.208195
Danio_rerio_newGene_11708	0.031072	0.10662	0.0477265	0.280983	0	0.0359255
Danio_rerio_newGene_11709	0.202067	0.175602	0.108565	0.341255	0.452803	0.311511
Danio_rerio_newGene_1171	1.31393	1.66918	1.33508	1.73847	1.59738	1.36289
Danio_rerio_newGene_11715	0.0330765	0.100581	0.201379	0.260518	0.183216	0.366918
Danio_rerio_newGene_11717	0.950758	0.883492	0.368984	0.886954	0.575599	0.276642
Danio_rerio_newGene_11718	0.94463	0.760263	0.741521	0.64346	1.10548	0.744422
Danio_rerio_newGene_11721	2.51401	1.20824	2.68298	2.30571	2.41459	1.7906
Danio_rerio_newGene_11723	1.92112	1.64993	2.07853	1.98192	1.45168	1.20851
Danio_rerio_newGene_11726	0.655444	0.691553	0.861203	0.638124	0.529959	0.77833
Danio_rerio_newGene_11728	1.92349	1.5769	1.51778	1.80277	2.14371	1.26497
Danio_rerio_newGene_11729	0	0.029696	0.022878	0.008512	0.111793	0.0248385
Danio_rerio_newGene_11731	6.7169	9.05507	6.04752	7.74241	7.19425	6.11221
Danio_rerio_newGene_11733	3.17103	5.03351	4.14285	3.75451	4.77026	3.29693
Danio_rerio_newGene_11737	1.00734	1.35455	1.26611	1.31333	1.22553	1.40152
Danio_rerio_newGene_11742	0.125095	0.075545	0	0.110795	0.036814	0.086823
Danio_rerio_newGene_11745	19.3629	19.1678	27.9591	21.4633	19.9059	24.7708
Danio_rerio_newGene_11746	1.75191	1.30039	1.81588	0.859062	1.75257	1.9979
Danio_rerio_newGene_11748	4.1074	4.62785	4.07348	2.81607	4.73707	5.27061
Danio_rerio_newGene_11753	0.100059	0.43179	0.429374	0.489317	0.437863	0.22615
Danio_rerio_newGene_11765	1.41695	1.9181	1.28021	1.47692	2.19574	1.5861
Danio_rerio_newGene_11772	1.60146	0.877528	0.944674	1.24316	1.12524	0.353164
Danio_rerio_newGene_11773	3.79482	3.66028	2.4954	2.85448	3.19016	1.937
Danio_rerio_newGene_11774	0.143609	0.249168	0	0.378619	0.268055	0.028874
Danio_rerio_newGene_11775	4.69497	4.47936	5.88482	6.48285	7.61234	7.41452
Danio_rerio_newGene_11781	0.598569	0.757178	0.937273	0.761896	0.53692	0.462789
Danio_rerio_newGene_11783	2.20048	2.9069	3.37266	3.64314	4.9599	3.59823
Danio_rerio_newGene_11785	3.03702	4.53301	5.06272	5.56362	4.64933	4.44751
Danio_rerio_newGene_11786	1.75116	1.67531	2.56589	1.9894	3.0808	2.60592
Danio_rerio_newGene_11797	0.491665	0.507177	0.387437	0.316974	0.244807	0.226711
Danio_rerio_newGene_11798	0.0618655	0.17012	0.287948	0.0903995	0.107168	0.108337
Danio_rerio_newGene_11801	2.09926	2.18968	2.23627	2.17836	2.05555	2.47379
Danio_rerio_newGene_11803	1.46832	1.29231	1.3947	1.34909	1.76218	1.31088
Danio_rerio_newGene_11814	1.37304	1.82746	2.09104	1.84154	1.28315	0.869241
Danio_rerio_newGene_11816	0.0334455	0.14944	0.062653	0.139164	0.153478	0.320441
Danio_rerio_newGene_11818	1.08742	1.89517	1.19608	1.34757	1.13253	1.2936
Danio_rerio_newGene_11819	0.921211	1.37067	0.552179	1.29225	0.888418	0.832351
Danio_rerio_newGene_1182	1.6724	1.24046	0.99568	1.51889	1.82129	0.671175
Danio_rerio_newGene_11821	1.09472	1.25928	1.5183	1.35176	1.15091	1.04509
Danio_rerio_newGene_11824	0.208503	0.0972525	0.053597	0.0974355	0.052494	0.0559775
Danio_rerio_newGene_11827	0.907028	3.41064	2.24625	2.57001	2.81438	1.32637
Danio_rerio_newGene_11839	0.777268	1.15901	1.01742	1.1486	1.48183	1.65754
Danio_rerio_newGene_11846	1.30644	1.37312	1.31457	0.961361	1.19463	1.76217
Danio_rerio_newGene_11847	0.115891	0.27085	0.213052	0.595534	0.252294	0.278402
Danio_rerio_newGene_11887	0.210085	0.225127	0.0686165	0	0	0.0523085
Danio_rerio_newGene_11888	0.086153	0.144158	0.0545895	0.0414815	0.059488	0.104263
Danio_rerio_newGene_11890	0	0.14662	0	0	0	0.062597
Danio_rerio_newGene_11895	0.172269	0.131624	0.0326545	0.152747	0	0.134429
Danio_rerio_newGene_11899	2.08594	2.98821	2.27299	2.18093	3.70071	2.87614
Danio_rerio_newGene_11911	0.381614	0.636825	0.54368	0.558528	0.736403	0.421723
Danio_rerio_newGene_11915	0.169635	0.203133	0.210154	0.129078	0.399718	0.476633
Danio_rerio_newGene_11937	0	0.0613595	0.07037	0	0.11807	0.121413
Danio_rerio_newGene_11952	0.200744	0.16848	0.1293	0.200059	0.112435	0.152596
Danio_rerio_newGene_11970	0.108483	0.148234	0.108294	0.208137	0.033067	0.038147
Danio_rerio_newGene_11973	0.3693	0.0994025	0	0.0958265	0.0996135	0.054718
Danio_rerio_newGene_11989	2.06378	2.08794	2.00033	0.975418	1.85801	2.47597
Danio_rerio_newGene_11994	0.33525	0.467963	0.514914	0.889055	1.10185	0.775999
Danio_rerio_newGene_12016	0.062337	0.0627835	0.035864	0.114277	0.222131	0.118801
Danio_rerio_newGene_12023	0.0292935	0.07462	0	0.30798	0	0
Danio_rerio_newGene_12031	0.125071	0.139604	0.149124	0.235434	0.117415	0.160475
Danio_rerio_newGene_1204	0.792933	1.03184	0.667922	0.946198	1.09421	0.909569
Danio_rerio_newGene_12040	0.101693	0.0626465	0.1878	0.0400895	0.114697	0.14298
Danio_rerio_newGene_12059	0.200231	0.776779	0.726261	0.147964	0.375105	0.355557
Danio_rerio_newGene_12062	0	0	0.196945	0.0926175	0.530526	0.282699
Danio_rerio_newGene_12065	0.413681	0	0.0149225	0.045639	0.062331	0
Danio_rerio_newGene_1209	10.4194	8.9494	11.1117	10.1027	9.7625	11.1927
Danio_rerio_newGene_12092	0	0	0	0.0503295	0	0.140362
Danio_rerio_newGene_12099	0	0	0.141322	0	0.095409	0.115726
Danio_rerio_newGene_12101	0.752873	0.326874	0.978467	0.69323	1.12666	0.795277
Danio_rerio_newGene_1212	10.1025	8.68467	6.33873	6.46247	7.8288	5.99584
Danio_rerio_newGene_12137	0	0.102279	0.0197915	0.043611	0.037034	0.197419
Danio_rerio_newGene_12138	0	0	0	0	0.0416505	0
Danio_rerio_newGene_12140	0.44809	0.402956	0.244501	0.34959	0.368282	0.390095
Danio_rerio_newGene_12141	0.369043	0.643993	0.389867	0.360058	0.621166	0.482447
Danio_rerio_newGene_1215	1.33143	1.79785	1.77846	2.00038	2.53089	1.57184
Danio_rerio_newGene_12158	0.568474	0.913942	0.862757	0.876124	0.500971	1.12752
Danio_rerio_newGene_12159	0.54177	0.564825	0.670664	0.359939	0.607127	0.539007
Danio_rerio_newGene_1216	4.36873	2.94163	4.04797	3.89671	4.40962	4.20752
Danio_rerio_newGene_12167	0.842638	1.15841	1.31168	1.24742	1.56673	1.47601
Danio_rerio_newGene_12182	0.19579	0.392199	0.288447	0.252663	0.199346	0.195188
Danio_rerio_newGene_122	0.834748	1.01806	1.01833	0.977197	0.772422	0.808863
Danio_rerio_newGene_12205	0	0.238005	0	0.182793	0	0
Danio_rerio_newGene_12209	0.192761	0.179123	0.307287	0.195692	0.319381	0.210987
Danio_rerio_newGene_1221	2.31713	1.85142	1.3472	1.95414	1.19606	2.21164
Danio_rerio_newGene_12217	0.0623135	0.157856	0.180933	0.0974215	0.050459	0.098612
Danio_rerio_newGene_12229	0.217554	0.445981	0.500193	0.507966	0.570147	0.333119
Danio_rerio_newGene_1223	9.26044	8.32327	7.03378	7.26495	7.70669	6.94835
Danio_rerio_newGene_1224	7.03328	9.40283	6.0671	6.36242	13.2662	13.0299
Danio_rerio_newGene_12254	4.2545	4.53718	4.03607	4.36559	4.64868	4.88642
Danio_rerio_newGene_12259	0.442834	0.585101	0.441045	0.575192	0.272037	0.44311
Danio_rerio_newGene_12260	0.802307	1.20831	1.001	1.06133	0.665412	0.445331
Danio_rerio_newGene_1227	12.0275	6.83348	6.5929	10.3837	10.8175	11.7322
Danio_rerio_newGene_12278	0.404435	0.526852	0.516943	0.536832	0.823414	0.655892
Danio_rerio_newGene_12285	2.00174	1.97781	2.3488	2.7474	2.71782	2.23525
Danio_rerio_newGene_12307	0.379802	0.153175	0.258568	0.270693	0.061243	0.495866
Danio_rerio_newGene_1232	0.237266	0.0281135	0.271164	0.053791	0	0.074917
Danio_rerio_newGene_12320	0.146437	0.424144	0.250368	0.25918	0.149365	0.190841
Danio_rerio_newGene_12328	2.36731	2.90285	3.93295	3.04081	4.40152	3.32048
Danio_rerio_newGene_12330	3.74241	4.20434	3.56582	3.81008	4.11851	3.64067
Danio_rerio_newGene_12335	9.71805	10.2871	10.2759	9.3706	11.7351	10.8947
Danio_rerio_newGene_1234	3.70228	3.69358	3.0416	4.17715	3.69616	2.75774
Danio_rerio_newGene_12344	5.93212	5.56326	5.50235	4.96359	6.11868	5.25196
Danio_rerio_newGene_12349	10.2645	12.7529	13.9946	15.1015	16.4693	13.5051
Danio_rerio_newGene_12354	0.924455	0.903649	0.836058	0.662361	1.26869	1.08796
Danio_rerio_newGene_12357	3.54631	3.28923	3.38529	3.83268	3.56559	2.66162
Danio_rerio_newGene_12358	3.64402	4.3835	4.77176	6.11145	3.90009	2.73588
Danio_rerio_newGene_1236	7.26325	6.43112	7.79697	9.25289	10.7226	9.63392
Danio_rerio_newGene_12367	2.19706	3.73054	2.94157	4.48117	3.02808	3.04619
Danio_rerio_newGene_12372	2.10229	1.99926	2.30172	1.91472	1.63165	2.02605
Danio_rerio_newGene_12382	0.79801	1.16639	0.762852	0.876108	0.720285	0.93247
Danio_rerio_newGene_12383	0.852294	1.1859	1.00093	1.28545	1.20557	0.947286
Danio_rerio_newGene_12386	0.097628	0.12523	0.331099	0.142129	0.077242	0.102731
Danio_rerio_newGene_12399	4.24112	5.6024	4.43688	5.62794	7.55662	4.94572
Danio_rerio_newGene_12404	1.27988	1.21182	1.09751	0.92894	0.881664	0.678276
Danio_rerio_newGene_12409	0.996714	1.06265	1.11365	0.949217	1.04805	0.925422
Danio_rerio_newGene_12411	0.508383	1.43157	0.990318	0.646597	0.842826	0.61682
Danio_rerio_newGene_12412	1.18743	1.30244	1.04429	2.28102	1.12411	1.80289
Danio_rerio_newGene_12413	0	0.024183	0.0608725	0	0.197108	0
Danio_rerio_newGene_12420	1.98935	1.06033	0.897459	1.92323	2.07605	1.74092
Danio_rerio_newGene_12421	3.48021	3.59856	3.56409	2.20963	2.24478	3.31983
Danio_rerio_newGene_12430	4.34317	5.46953	3.14612	4.65084	5.53939	3.57765
Danio_rerio_newGene_12431	5.01596	5.17558	4.05835	4.35087	5.38105	3.79499
Danio_rerio_newGene_12440	0.921597	1.04346	0.2331	0.489945	0.447719	0
Danio_rerio_newGene_12445	0	0.227625	0.239289	0.101708	0.247639	0.283631
Danio_rerio_newGene_12446	1.61271	1.5189	2.30907	2.40484	1.99836	2.14967
Danio_rerio_newGene_12447	0.922584	1.26808	1.54457	1.73116	1.01544	1.19345
Danio_rerio_newGene_12448	1.55501	1.40592	1.56709	1.44965	1.18381	0.817972
Danio_rerio_newGene_12457	0.299723	0.161822	0.061571	0.234776	0.189514	0.346808
Danio_rerio_newGene_12458	3.21192	3.14291	3.61359	3.09399	3.71572	3.21037
Danio_rerio_newGene_1246	0.241668	0.39888	0.450099	0.280464	0.532557	0.344109
Danio_rerio_newGene_1247	1.68883	2.44359	2.16765	2.76808	2.89388	2.47839
Danio_rerio_newGene_12472	2.20917	2.30566	2.25124	2.56589	2.51374	1.12839
Danio_rerio_newGene_12475	1.88585	2.05449	1.89451	1.8702	2.25385	2.19848
Danio_rerio_newGene_12476	1.13397	1.32923	0.923016	1.14186	1.08996	1.18913
Danio_rerio_newGene_12477	0.64085	1.09645	0.654478	0.816258	0.526355	0.46527
Danio_rerio_newGene_12483	0.621298	0.845452	1.22803	0.875641	1.13461	1.22318
Danio_rerio_newGene_12484	0.387211	1.89843	0.787408	0.611624	1.4563	1.25298
Danio_rerio_newGene_12488	1.24732	1.29222	1.18528	1.39904	1.46697	0.909266
Danio_rerio_newGene_12489	1.4184	1.18055	0.961779	0.965782	0.863656	0.781057
Danio_rerio_newGene_12495	0	0	0	0.188949	0.648951	0.19292
Danio_rerio_newGene_12496	0.361653	1.23271	0.914382	1.31457	2.2104	2.0501
Danio_rerio_newGene_125	1.01579	1.47647	1.55823	1.81947	2.27891	2.18452
Danio_rerio_newGene_12502	0	0	0.188931	0.282645	0.329603	0.038571
Danio_rerio_newGene_12503	0	0.250963	0.055576	0.033737	0.102099	0.041623
Danio_rerio_newGene_12504	0.474553	0.543005	0.411618	0.612801	1.2597	0.775092
Danio_rerio_newGene_12509	0.325316	0.242519	0.341497	0.353824	0.381474	0.273025
Danio_rerio_newGene_12511	1.22315	1.85133	1.11399	1.92483	2.82021	1.81391
Danio_rerio_newGene_12523	3.27729	4.24351	3.33739	5.78317	5.95458	3.92338
Danio_rerio_newGene_12527	0.270462	0.183798	0.227217	0.017054	0.122082	0.282486
Danio_rerio_newGene_12536	14.3241	10.6708	10.7946	10.2656	7.53758	5.92258
Danio_rerio_newGene_12537	0.275043	0.364758	0.546106	0.977452	1.86369	1.04817
Danio_rerio_newGene_1254	0.273039	0.04689	0.050856	0.058633	0.0504315	0.175417
Danio_rerio_newGene_12540	9.0722	9.66095	13.705	13.2269	13.3759	13.0517
Danio_rerio_newGene_12547	1.19551	2.58963	1.38369	1.78747	2.51415	1.77997
Danio_rerio_newGene_12548	1.95965	2.47846	2.06656	1.36376	1.79648	1.51764
Danio_rerio_newGene_12550	0.861611	1.08727	1.2785	0.541101	0.615754	0.655321
Danio_rerio_newGene_12559	0.762029	1.22608	0.97933	1.12782	1.40382	1.07141
Danio_rerio_newGene_1256	0.485654	0.200851	0.52612	0.349195	0.33969	0.3063
Danio_rerio_newGene_12563	2.20723	1.89193	1.51027	1.21758	0.755586	0.725516
Danio_rerio_newGene_12564	0.805473	0.899072	1.15348	1.43678	1.35578	1.05247
Danio_rerio_newGene_12567	1.71023	1.77621	1.65346	1.62792	2.0586	1.63079
Danio_rerio_newGene_1257	0.669704	0.441676	0.964284	0.533567	0.754978	0.956773
Danio_rerio_newGene_12575	0.415596	0.524061	0.366723	0.410497	0.510271	0.17003
Danio_rerio_newGene_12580	1.25596	1.51978	1.30575	1.12961	1.40093	1.16278
Danio_rerio_newGene_12582	0.006094	0	0	0.0896175	0.006012	0.0127905
Danio_rerio_newGene_12587	1.12087	1.55617	0.939196	1.54138	1.05326	1.5332
Danio_rerio_newGene_12590	3.99226	5.21987	3.85263	4.39968	4.34055	2.63169
Danio_rerio_newGene_12592	0.310346	0.252094	0.1888	0.101597	0.156135	0.168833
Danio_rerio_newGene_12597	2.01023	2.97194	2.59893	2.31873	3.79876	2.8116
Danio_rerio_newGene_126	2.03889	1.16999	1.26967	1.01433	0.841238	0.990765
Danio_rerio_newGene_12601	0.632802	0.059877	0.360464	0.078814	0.354406	0.141913
Danio_rerio_newGene_12604	5.414	6.25037	4.35227	6.99577	8.55581	6.81876
Danio_rerio_newGene_12605	0.919451	1.36693	1.18782	0.855507	0.549917	0.65115
Danio_rerio_newGene_12606	0	0	0	0	0.0126185	0
Danio_rerio_newGene_12607	3.27793	3.30656	3.20829	3.02671	3.19419	2.86327
Danio_rerio_newGene_12608	4.06235	3.6984	3.22781	4.08706	4.68643	4.16901
Danio_rerio_newGene_12621	3.10058	3.97212	4.52715	4.25393	5.9464	5.90723
Danio_rerio_newGene_12622	6.21045	7.11157	7.5569	7.63186	9.12247	7.75717
Danio_rerio_newGene_12623	3.69164	4.71048	6.18049	5.43636	6.40738	5.96844
Danio_rerio_newGene_12627	2.51799	3.0241	2.13502	3.77684	3.4486	2.46481
Danio_rerio_newGene_12632	1.02867	0.830125	0.959936	0.83696	1.20983	1.24945
Danio_rerio_newGene_12637	13.9731	15.2907	14.8222	18.0223	20.7084	20.2833
Danio_rerio_newGene_12638	7.97235	7.49486	7.86907	6.70725	7.72897	10.3305
Danio_rerio_newGene_12641	2.5748	2.599	3.39793	4.02367	3.79998	5.57217
Danio_rerio_newGene_12642	1.19993	0.312723	0.135079	0.300731	1.46846	0.29816
Danio_rerio_newGene_12643	4.56382	5.47096	6.32727	5.33176	5.34049	5.18745
Danio_rerio_newGene_12644	3.68256	2.89393	4.28534	4.93246	3.50696	3.92467
Danio_rerio_newGene_12646	1.44878	1.45044	1.56729	1.46886	1.36652	1.03532
Danio_rerio_newGene_12653	0.241247	0.350275	0.591911	0.278087	0.258987	0.294514
Danio_rerio_newGene_12657	0.063045	0	0.145829	0.28689	0.572968	0.209525
Danio_rerio_newGene_12659	0.09808	0.175812	0.132965	0.027005	0.149245	0.113542
Danio_rerio_newGene_12660	6.68151	5.96494	5.09616	5.90977	5.93215	3.56603
Danio_rerio_newGene_12673	0.344421	0.942409	0.43763	0.258732	0.476565	0.370733
Danio_rerio_newGene_12674	0.979472	1.49509	1.0833	0.440385	0.279471	0.409309
Danio_rerio_newGene_12675	1.53855	1.85896	1.72316	2.06214	2.66164	1.88082
Danio_rerio_newGene_12693	0.270072	0.617982	0.699509	0.446939	0.312519	0.346801
Danio_rerio_newGene_12697	0.500112	0.708633	0.809749	0.680669	0.772061	0.809262
Danio_rerio_newGene_12698	0.171503	0.329805	0.25805	0.2787	0.172261	0.193254
Danio_rerio_newGene_12699	0.849203	0.430446	0.6429	0.63295	0.364504	0.736312
Danio_rerio_newGene_12704	2.862	3.28855	3.76387	2.4897	4.10074	3.51493
Danio_rerio_newGene_12708	0.637545	0.650987	0.203211	0.510007	0.661925	0.746339
Danio_rerio_newGene_12715	0	0.207084	0.134906	0.060127	0	0
Danio_rerio_newGene_12716	1.93974	2.57058	3.04726	2.44329	2.22452	2.01934
Danio_rerio_newGene_12717	0.922432	1.62738	1.66903	2.00216	1.44181	0.801839
Danio_rerio_newGene_12718	1.08472	0.450474	0.934102	0.494277	1.05518	1.036
Danio_rerio_newGene_12725	1.14731	1.28858	1.06954	1.66472	1.65462	1.49334
Danio_rerio_newGene_12726	0.256655	0.315751	0.178805	0.287761	0.272838	0.8794
Danio_rerio_newGene_12727	5.05088	4.31373	4.59002	5.125	5.46695	4.81714
Danio_rerio_newGene_12738	4.13263	3.67208	3.45864	3.83683	4.96249	3.67882
Danio_rerio_newGene_12745	0	0.026742	0.164739	0.143157	0.0226375	0.022526
Danio_rerio_newGene_1275	0.620668	1.43532	0.820813	1.39276	0.55188	0.805307
Danio_rerio_newGene_12751	0.814241	0.71814	0.685279	0.787817	0.595551	0.461668
Danio_rerio_newGene_12754	2.40614	3.20182	2.54114	2.30945	3.37764	3.28812
Danio_rerio_newGene_12763	0.0424045	0.190091	0	0.241871	0.167478	0.236488
Danio_rerio_newGene_12764	1.44964	2.59281	2.07551	0.922972	1.58029	1.59606
Danio_rerio_newGene_12776	1.54208	1.18702	1.17684	1.34788	1.37853	0.201012
Danio_rerio_newGene_12777	2.89545	4.00115	2.34553	3.13835	2.44583	2.59491
Danio_rerio_newGene_12783	0.775312	1.06694	0.648641	0.738997	0.905346	1.39024
Danio_rerio_newGene_12784	0.498989	0.532142	0.564518	0.193711	0.149628	0.60885
Danio_rerio_newGene_12787	4.98074	5.84671	4.99445	5.78787	6.67901	7.02772
Danio_rerio_newGene_12794	4.19968	4.67382	4.41173	4.25151	4.7068	3.47521
Danio_rerio_newGene_12799	0.331539	0.53956	0.59339	0.242915	0.450647	0.559551
Danio_rerio_newGene_1280	1.56609	0.785268	0.771173	0.839473	0.694306	0.470322
Danio_rerio_newGene_12811	0.099209	0.843927	0.261672	0.241413	0.356385	0.219646
Danio_rerio_newGene_12818	0.395906	0.438316	0.252944	0.268885	0.363374	0.15379
Danio_rerio_newGene_1282	0.115539	0.41184	0.112397	0.257441	0.327509	0.460191
Danio_rerio_newGene_12828	2.43953	0.954401	2.9395	2.04694	3.04107	2.5085
Danio_rerio_newGene_1283	1.47419	0.241362	0.426862	0.24125	0.409681	0.202882
Danio_rerio_newGene_1284	1.35714	2.09174	1.18429	1.43327	0.629847	0.763155
Danio_rerio_newGene_12843	0.172723	0.273999	0.357662	0.125192	0.216122	0.237488
Danio_rerio_newGene_12847	0.314976	0.442348	0.424768	0.415343	0.426814	0.434554
Danio_rerio_newGene_12848	0.511975	0.97011	0.832828	1.01112	0.913969	0.819131
Danio_rerio_newGene_12856	0.259421	0.344737	0.435273	0.191509	0.26724	0.363775
Danio_rerio_newGene_1286	1.44922	1.58931	1.70677	2.01967	2.05361	1.66792
Danio_rerio_newGene_12892	0.301193	0.254647	1.56412	1.34451	1.54781	1.57945
Danio_rerio_newGene_12901	0.416413	0.3317	0.452129	0.486986	0.571878	0.438222
Danio_rerio_newGene_12902	0	0	0	0.050497	0.288324	0.318747
Danio_rerio_newGene_12910	0.08618	0	0.272524	0	0.078423	0.0317425
Danio_rerio_newGene_12914	0.847465	1.16637	1.36544	1.44484	1.45901	1.43874
Danio_rerio_newGene_12916	0.354675	0.72554	0.673327	0.595892	0.922372	0.639922
Danio_rerio_newGene_12917	0.453183	0.346551	0.216554	0.222663	0.144773	0.220149
Danio_rerio_newGene_12918	0.730908	0.973616	0.817858	0.085436	0.716116	0.236986
Danio_rerio_newGene_12953	7.90097	7.58538	8.25694	7.92343	8.73239	10.2583
Danio_rerio_newGene_12955	0.825174	0.787764	0.905995	0.686128	0.719816	0.702888
Danio_rerio_newGene_12958	0.201384	0.240703	0.118327	0.116295	0.101897	0.104929
Danio_rerio_newGene_1296	0.552364	0.20178	0.101656	0.44164	0.251381	0.148306
Danio_rerio_newGene_12960	0.929565	0.501704	0.678943	0.723483	0.922732	0.543171
Danio_rerio_newGene_12964	0.096481	0.238026	0.11367	0.139673	0.139574	0.162177
Danio_rerio_newGene_12972	0.603046	0.456735	0.369455	1.00316	0.581231	0.545555
Danio_rerio_newGene_1298	0.883638	0.85493	0.782644	0.564719	0.650834	0.792706
Danio_rerio_newGene_1299	1.75981	2.36948	2.12492	2.31391	2.56042	2.12303
Danio_rerio_newGene_12995	0.164483	0.172366	0.13361	0	0.204516	0
Danio_rerio_newGene_12999	0.606958	0.138808	0	0.240943	0.165504	0.159031
Danio_rerio_newGene_13023	16.7582	38.8998	12.9708	15.3891	18.0067	18.4276
Danio_rerio_newGene_13046	0.376215	0.467676	0.748477	1.23515	0.696782	0.373732
Danio_rerio_newGene_13068	2.15822	1.43641	0.344012	2.16471	2.69269	4.77181
Danio_rerio_newGene_1307	0.680929	0.816245	0.638992	0.845413	0.940215	0.519247
Danio_rerio_newGene_13075	1.49229	1.2186	1.10758	1.06993	1.16593	0.975557
Danio_rerio_newGene_13076	0.376045	0.439054	0.582203	0.623746	0.262133	0.26708
Danio_rerio_newGene_13081	0	0	0.0810385	0	0.110725	0
Danio_rerio_newGene_13093	0.139383	0.234541	0.128927	0.601733	0.376226	0.260725
Danio_rerio_newGene_13097	0.099631	0.146172	0.135326	0.193302	0.140281	0.207756
Danio_rerio_newGene_13126	2.06968	2.16758	2.66951	1.53232	1.68547	1.67673
Danio_rerio_newGene_13129	0.4468	0.879406	0.434283	0.722303	0.865757	0.614177
Danio_rerio_newGene_13138	12.3389	13.1299	11.4618	9.71047	13.1121	11.3688
Danio_rerio_newGene_13139	0.808506	0.963744	1.01648	1.41864	0.646744	1.07653
Danio_rerio_newGene_13140	0.033877	0.228159	0.192611	0.169917	0.102088	0.174251
Danio_rerio_newGene_13154	10.0554	12.3798	14.4827	15.5087	17.3487	13.3292
Danio_rerio_newGene_13155	1.80867	2.17126	1.88567	2.13266	2.76028	2.40943
Danio_rerio_newGene_13164	0.140038	0.106398	0.15901	0.0240625	0.099841	0.211561
Danio_rerio_newGene_132	0.16808	0.197366	0.098216	0.317546	0.124025	0.161072
Danio_rerio_newGene_1320	1.15739	2.20777	1.91212	2.7059	2.62225	2.77825
Danio_rerio_newGene_13202	0	0	0	0	0	0
Danio_rerio_newGene_13215	0.487159	0.855996	0.441574	0.736052	1.02138	2.12421
Danio_rerio_newGene_13216	0.500759	0.589236	0.570639	0.756867	0.287072	0.362571
Danio_rerio_newGene_13218	1.4832	0.933953	1.06356	0.899463	0.587695	0.64691
Danio_rerio_newGene_13226	0.155774	0.496405	0.233986	0.302613	0.230215	0.548397
Danio_rerio_newGene_1323	0.783892	1.18809	0.79687	1.01298	0.929898	0.729428
Danio_rerio_newGene_13242	11.3392	11.2004	11.5996	11.1812	10.1145	11.2243
Danio_rerio_newGene_13266	0.0594635	0.175743	0.11481	0.500743	0.254076	0.063554
Danio_rerio_newGene_13271	0	0	0.061434	0.053811	0.0481065	0
Danio_rerio_newGene_13272	0.170983	0.0318935	0.277396	0.021714	0	0.134814
Danio_rerio_newGene_13277	0.738681	1.12891	0.704341	0.536347	0.696816	0.823648
Danio_rerio_newGene_13289	2.41255	2.2231	2.43524	1.96036	1.71778	1.03871
Danio_rerio_newGene_13312	0.697582	0.755171	0.663795	0.468313	0.495706	0.273962
Danio_rerio_newGene_13313	2.54184	2.87405	1.72146	1.18483	2.3144	2.83419
Danio_rerio_newGene_13315	1.19892	1.26482	0.988376	1.20795	0.751335	0.562356
Danio_rerio_newGene_13326	3.21607	2.95471	3.04445	2.64659	2.5578	1.69862
Danio_rerio_newGene_13330	2.00702	2.4679	2.03218	1.76086	1.27951	1.23178
Danio_rerio_newGene_13332	1.68983	1.78254	1.33143	1.66493	1.85846	1.25207
Danio_rerio_newGene_13341	0.172899	0.066785	0.0256415	0.413315	0.138873	0.242498
Danio_rerio_newGene_13350	0.483597	0.641726	0.453113	0.428253	0.474571	0.768857
Danio_rerio_newGene_13354	8.21099	7.95724	7.72959	6.95055	5.33292	5.39153
Danio_rerio_newGene_13356	0.169333	0.24651	0.303514	0.307911	0.221336	0.217799
Danio_rerio_newGene_13359	0.281873	0.376179	1.16739	1.05082	1.1172	1.34832
Danio_rerio_newGene_13365	0	0.154718	0	0	0	0
Danio_rerio_newGene_13375	2.29465	3.05727	1.84721	1.64751	0.945607	1.51637
Danio_rerio_newGene_13377	0.341304	0.188359	0.406107	0	0.11184	0.298421
Danio_rerio_newGene_13392	5.77915	6.35988	7.31821	8.35356	9.04764	6.51545
Danio_rerio_newGene_13397	4.93992	5.09588	4.86391	7.8165	5.49937	4.66052
Danio_rerio_newGene_134	2.73288	3.16682	2.28182	3.07069	3.21691	2.23533
Danio_rerio_newGene_13421	2.09999	1.27133	1.38294	0.916592	1.55542	1.12483
Danio_rerio_newGene_13424	0.378789	2.44717	1.6554	0.9368	1.61028	1.04861
Danio_rerio_newGene_13431	0.536613	0	0	0	0.197806	0.114265
Danio_rerio_newGene_13449	0.577051	0.465375	0.377458	0.305341	0.501313	0.409547
Danio_rerio_newGene_13454	4.39602	4.16971	3.85082	3.99788	4.47959	2.8819
Danio_rerio_newGene_13461	3.90393	4.70865	3.13741	4.9324	4.92622	4.69063
Danio_rerio_newGene_13464	367.565	368.429	393.595	367.211	381.266	432.534
Danio_rerio_newGene_13481	0.2549	0.294677	0.41301	0.629552	0.327726	0.251971
Danio_rerio_newGene_13487	0	0	0	0	0	0
Danio_rerio_newGene_13493	0.202405	0.285786	0.134283	0.29027	0.551215	0.173795
Danio_rerio_newGene_13494	0.301341	0.778788	0.5978	0.340265	0.0686225	0.0074585
Danio_rerio_newGene_13497	0.760436	0.53754	1.08948	0.526772	0.185316	0.497432
Danio_rerio_newGene_13498	2.37508	1.67679	1.42501	1.86545	1.87664	1.32775
Danio_rerio_newGene_13503	0.438683	0.463526	0.213859	0.180232	0.626406	0.648652
Danio_rerio_newGene_13506	0.309812	0.657421	0.614404	0.375042	0.778968	0.396006
Danio_rerio_newGene_13511	0	0.32543	0.34992	0.157208	0.123665	0
Danio_rerio_newGene_13514	0.368083	0.201422	0.418828	0.200806	0.180084	0.185983
Danio_rerio_newGene_13515	0.927225	0.656843	0.81572	0.32164	0.455479	0.462149
Danio_rerio_newGene_13516	0.268205	0.354782	0.33796	0.428082	0.359591	0.048912
Danio_rerio_newGene_13519	0.651709	0.383725	0.574379	0.376259	0.472826	0.24647
Danio_rerio_newGene_13521	0.573531	0.564543	0.258428	0.411161	0.257209	0.476793
Danio_rerio_newGene_13522	0	0.277979	0.180422	0.327428	0.127042	0.308467
Danio_rerio_newGene_13529	0.251884	0.346338	0.619103	0.450759	0.212751	0.130679
Danio_rerio_newGene_1353	0.495111	0.653046	0.710619	0.924505	1.05451	0.690208
Danio_rerio_newGene_13539	1.82393	2.92304	2.22306	1.85755	1.6253	0.249538
Danio_rerio_newGene_13541	0.971244	1.03518	0.724356	0.557093	0.42437	0.551983
Danio_rerio_newGene_13543	1.74381	1.81156	2.49602	3.75528	2.91828	4.06789
Danio_rerio_newGene_13544	3.14395	4.07399	4.77124	5.5063	4.55562	3.90991
Danio_rerio_newGene_13545	0.470476	0.219494	0.538385	0.357113	0.233053	0.169206
Danio_rerio_newGene_13546	0.382051	0.299667	0.411014	0.353729	0.166185	0.623587
Danio_rerio_newGene_13547	5.60976	5.78815	7.12668	7.19653	5.77963	4.53902
Danio_rerio_newGene_13548	0.439391	0.6509	0.49938	0.524253	0.574666	0.324854
Danio_rerio_newGene_13556	2.94927	3.07378	3.77705	3.46926	4.971	4.22721
Danio_rerio_newGene_13557	1.36894	0.972605	1.11675	1.81897	0.509726	0.456221
Danio_rerio_newGene_13561	0.357818	0.639761	0.335698	0.812492	1.7508	1.38204
Danio_rerio_newGene_13565	23.4704	20.2999	19.6951	20.9573	21.3474	23.5927
Danio_rerio_newGene_13569	1.97901	2.31913	2.73955	1.63095	2.2426	2.30266
Danio_rerio_newGene_13570	9.3824	10.4911	8.33025	7.03082	9.96807	11.0912
Danio_rerio_newGene_13571	2.9184	2.87025	2.69541	2.76348	3.07584	4.65998
Danio_rerio_newGene_13573	0.149585	0.123397	0.193581	0.0985505	0	0.0934735
Danio_rerio_newGene_13578	0.255909	0.513097	0.256626	0.280792	0.044175	0
Danio_rerio_newGene_13583	4.75483	5.5944	4.07454	3.21976	2.5242	2.34999
Danio_rerio_newGene_13584	0.691713	0.590221	0.762302	0.234303	0.189959	0.0854995
Danio_rerio_newGene_13585	2.84411	2.61647	2.31285	1.98197	2.54704	1.77344
Danio_rerio_newGene_13592	0.148797	0.11826	0.281216	0.055778	0.0957335	0.058397
Danio_rerio_newGene_13594	0.0592155	0.182865	0.11696	0.133495	0.239934	0.405475
Danio_rerio_newGene_136	4.04091	4.1456	3.49377	4.09804	4.17759	2.46716
Danio_rerio_newGene_13614	1.97875	1.1839	2.3282	2.0665	3.3992	2.2126
Danio_rerio_newGene_13617	0.484115	0.565415	0.687034	0.30882	0.284661	0.41117
Danio_rerio_newGene_13618	0	0	0	0	0.237527	0
Danio_rerio_newGene_13619	1.43912	0.850399	0.455333	0.437716	0.377557	0.234268
Danio_rerio_newGene_13622	0.153848	0.562213	0.60792	0.524608	0.548056	0.493921
Danio_rerio_newGene_13623	0.440546	0.593821	0.21474	0.14093	0.255186	0.11542
Danio_rerio_newGene_13629	1.93254	1.48917	1.6927	1.82793	1.10919	0.834782
Danio_rerio_newGene_13631	2.90786	3.0962	3.61685	3.94501	3.94552	3.03752
Danio_rerio_newGene_13639	2.11573	1.97214	2.1456	2.23688	1.78278	1.71281
Danio_rerio_newGene_13642	1.85943	1.91925	1.92315	1.42413	1.29049	1.05238
Danio_rerio_newGene_13643	1.16957	1.37588	1.54749	1.79903	1.13793	0.83417
Danio_rerio_newGene_13655	1.65905	1.02886	0.780811	0.528066	1.50228	1.82913
Danio_rerio_newGene_13656	1.45321	1.81394	1.91655	1.57747	1.89008	1.37001
Danio_rerio_newGene_13658	6.08548	6.40831	5.02052	6.11508	6.37856	5.74295
Danio_rerio_newGene_13660	0.274154	0.175456	0.198261	0.187095	0.229237	0.23606
Danio_rerio_newGene_1367	1.77703	2.27236	1.01593	1.87026	2.05047	2.32584
Danio_rerio_newGene_13672	0.5284	0.401247	0.484061	0.435518	0.373265	0.224524
Danio_rerio_newGene_13673	0.293417	0.242166	0.283144	0.317559	0.188122	0.16893
Danio_rerio_newGene_13674	0.211875	0.48977	0.777865	0.521122	0.669445	0.914516
Danio_rerio_newGene_13675	0	0.091223	0.139889	0.120156	0.314026	0.0395295
Danio_rerio_newGene_13679	7.4533	7.5849	7.14968	6.63689	6.95457	5.45349
Danio_rerio_newGene_13686	1.45715	1.2988	1.51837	0.842531	1.50998	0.962141
Danio_rerio_newGene_13693	1.01041	0.923596	0.760375	0.936786	0.6668	0.837448
Danio_rerio_newGene_137	2.10748	2.45729	2.05952	1.91433	2.01898	2.16342
Danio_rerio_newGene_1370	0.522875	0.835612	0.753495	0.877875	1.13425	0.842801
Danio_rerio_newGene_13705	0.266722	0.303986	0.797811	0.82248	0.956805	0.819271
Danio_rerio_newGene_13706	0.188349	0	0.345765	0	0	0
Danio_rerio_newGene_13708	0.347873	0.052151	0.059841	0.474602	0.052241	0.0696105
Danio_rerio_newGene_1372	0	0.169451	0.282093	0.315344	0.416247	0.129827
Danio_rerio_newGene_13726	0.267908	0.204123	0.264347	0.1831	0.17727	0.403698
Danio_rerio_newGene_13734	1.32299	1.62426	1.09308	2.10768	2.22257	1.20785
Danio_rerio_newGene_1374	0.078043	0.188382	0.124158	0.082284	0.19206	0.216675
Danio_rerio_newGene_13745	0.492057	0.537281	0.578623	0.474348	0.8234	0.796477
Danio_rerio_newGene_13746	0.0920715	0.440163	0.138657	0.270267	0.203013	0.226429
Danio_rerio_newGene_13752	0.260687	0.184397	0.348973	0.295868	0.260138	0.097219
Danio_rerio_newGene_13754	0.281405	0	0.146922	0	0.115179	0.0811695
Danio_rerio_newGene_13757	0.728733	1.02795	0.682764	0.294598	0.221017	0.541424
Danio_rerio_newGene_13758	0.812457	1.12735	1.11889	0.931307	0.588119	0.518079
Danio_rerio_newGene_13759	0.342806	0.744117	0.31842	0.344445	0.155278	0.11877
Danio_rerio_newGene_13765	3.37225	5.09995	5.82962	5.0842	5.05915	4.01424
Danio_rerio_newGene_13766	2.34135	2.0801	2.26359	2.00932	2.3988	2.20161
Danio_rerio_newGene_13769	0.079533	0	0.163148	0.166371	0	0.245495
Danio_rerio_newGene_13770	1.23126	1.10361	0.755078	0.68604	0.541548	0.927007
Danio_rerio_newGene_13772	0.380171	0.0166015	0.656852	0	0.10724	0
Danio_rerio_newGene_13773	0	0.309041	0	0	0	0
Danio_rerio_newGene_13774	0.067731	0.412829	0.222931	0.337359	0.36847	0.0800985
Danio_rerio_newGene_13775	0.394068	0.22676	0.736465	0.39893	0.362804	0.296142
Danio_rerio_newGene_13777	0	0	0	0	0.359333	0
Danio_rerio_newGene_13778	1.66054	1.11625	0	0	0.739928	0.1304
Danio_rerio_newGene_13781	0.138102	0.160189	0.109336	0.182801	0.125446	0
Danio_rerio_newGene_13787	1.42657	2.40923	1.68551	1.6337	2.0221	0.336736
Danio_rerio_newGene_13799	0.5779	0.4368	0.666654	0.312126	0.623374	0.492759
Danio_rerio_newGene_1380	15.4643	13.3898	11.9623	12.8828	14.8455	13.4049
Danio_rerio_newGene_13803	1.46646	2.11288	1.28838	2.28174	1.70672	1.3873
Danio_rerio_newGene_13806	5.05071	5.42567	6.22777	6.26698	8.17317	6.91826
Danio_rerio_newGene_13813	0.034766	0	0.403204	0.0218365	0.06487	0.0350105
Danio_rerio_newGene_13823	0.954214	0.737323	0.7409	0.447311	0.588311	0.505521
Danio_rerio_newGene_13824	1.6792	1.28632	1.1558	1.42057	1.18005	1.16704
Danio_rerio_newGene_13826	0.623152	0.730846	0.573214	0.553861	0.993643	0.492345
Danio_rerio_newGene_13827	0.162341	0.28003	0.144677	0.132022	0.0638325	0.139364
Danio_rerio_newGene_13838	6.77365	5.98236	8.2278	10.1484	8.35612	5.92956
Danio_rerio_newGene_13842	0.969838	0.902983	1.38664	1.45254	1.45646	0.960604
Danio_rerio_newGene_13843	1.17627	1.03569	1.45223	1.47196	1.38878	1.16431
Danio_rerio_newGene_13846	2.48089	2.51276	5.07129	26.3862	29.793	10.1639
Danio_rerio_newGene_13856	0.329045	0.364752	0.386442	0.363007	0.317799	0.299532
Danio_rerio_newGene_1386	0.105477	0.201712	0.407915	0.13441	0.220065	0.159161
Danio_rerio_newGene_13865	0.0947635	0.0157565	0.163875	0.326435	0.212861	0.226478
Danio_rerio_newGene_13866	0.251106	0.137312	0.185545	0.384209	0.206346	0.050273
Danio_rerio_newGene_13867	0.25966	0.662947	0.560234	0.225771	0.269225	0.252248
Danio_rerio_newGene_13869	1.10516	1.74256	0.789637	1.01127	1.10985	0.6834
Danio_rerio_newGene_13870	2.21119	1.80912	1.81987	1.78696	2.7696	3.19721
Danio_rerio_newGene_13877	2.31255	2.06979	1.50198	1.4482	1.03411	1.13968
Danio_rerio_newGene_13885	2.11659	2.48827	2.63225	2.54701	2.71455	2.32481
Danio_rerio_newGene_13886	8.14473	7.5937	9.84668	9.96399	10.4843	4.93169
Danio_rerio_newGene_13887	0.208535	0.015579	0.118254	0.509744	0.146076	0.0968555
Danio_rerio_newGene_13905	1.03648	1.06048	0.802137	1.13278	1.09841	0.758058
Danio_rerio_newGene_13914	0.595483	0.508714	0.138365	0.275143	0.120416	0.235575
Danio_rerio_newGene_13917	2.12449	2.04907	3.89133	1.57919	2.61389	1.61672
Danio_rerio_newGene_1392	1.05084	1.00939	0.934681	1.1245	1.47718	0.959038
Danio_rerio_newGene_13922	0.791427	1.37847	2.73932	2.23214	2.75198	2.58827
Danio_rerio_newGene_1393	1.64837	1.88822	1.82499	1.50675	2.00857	1.49096
Danio_rerio_newGene_13930	0.53504	0.780212	0.24098	1.01269	0.743137	0.504033
Danio_rerio_newGene_1395	0.992307	1.14546	1.07021	1.02698	1.13719	0.920289
Danio_rerio_newGene_13959	0.082521	0	0.0652385	0.212635	0.190435	0
Danio_rerio_newGene_13960	1.9497	2.12261	1.90095	1.46449	2.44073	1.47897
Danio_rerio_newGene_13962	0.365922	0.593014	0.215414	0.447513	0.126868	0.240557
Danio_rerio_newGene_13963	4.13929	3.04845	3.5581	3.09822	2.89545	2.27253
Danio_rerio_newGene_13964	1.4868	1.66676	1.63476	1.61339	1.57663	1.20429
Danio_rerio_newGene_13965	0.654319	0.885725	1.3086	1.25504	1.15799	1.10111
Danio_rerio_newGene_13977	1.6123	1.73967	1.03236	1.5325	0.917384	1.29501
Danio_rerio_newGene_14	1.82408	2.49847	2.31287	2.46485	3.25494	2.92033
Danio_rerio_newGene_140	0.39633	0.523772	0.467774	0.430532	0.579364	0.348379
Danio_rerio_newGene_14023	0.275823	0.375305	0.357444	0.414171	0.392614	0.398444
Danio_rerio_newGene_14024	0.0304325	0.097327	0.0675215	0.256368	0.180499	0.201643
Danio_rerio_newGene_14025	1.50006	1.53428	1.74187	1.74013	1.87679	1.42312
Danio_rerio_newGene_1403	0.99811	0.779627	0.968893	1.01194	0.699252	1.06745
Danio_rerio_newGene_14048	0.403902	0.849287	0.3952	0.367447	0.724628	0.358987
Danio_rerio_newGene_14053	0.242895	0.476532	0.385864	0.382215	0.662243	0.300397
Danio_rerio_newGene_14064	0.335723	0.398078	0.295871	0.207199	0.337717	0.190305
Danio_rerio_newGene_14066	0.536865	0.262773	0.218769	0.301974	0.0749215	0.060811
Danio_rerio_newGene_14067	0.550327	0.712631	0.457165	0.16869	0.095239	0.170474
Danio_rerio_newGene_14077	3.18093	4.03227	2.54205	3.28116	2.58119	3.18234
Danio_rerio_newGene_1408	8.78808	8.45116	9.04844	5.62758	6.31313	3.62699
Danio_rerio_newGene_14106	0.150366	0.287353	0.335997	0.400714	0.281562	0.398678
Danio_rerio_newGene_14107	0.347185	0.324412	0.395728	0.18454	0.299629	0.193854
Danio_rerio_newGene_14119	0.931841	1.14607	0.860038	0.570769	0.517674	0.433947
Danio_rerio_newGene_14133	0.430408	0.525921	0.408894	0.465341	0.646845	0.514906
Danio_rerio_newGene_14139	0.386568	0.96446	0.407726	0.479338	0.767478	0.638311
Danio_rerio_newGene_14144	1.21137	0.981703	0.901799	0.970187	1.20665	1.17948
Danio_rerio_newGene_14146	0.82644	0.692713	0.640326	0.910988	0.897382	0.785206
Danio_rerio_newGene_14148	1.4481	1.66099	1.42756	2.1237	1.92122	2.05055
Danio_rerio_newGene_14150	6.36102	6.93483	6.21656	7.17919	8.10688	4.4474
Danio_rerio_newGene_14153	3.43952	3.19656	2.54899	2.01881	1.88019	2.13759
Danio_rerio_newGene_14154	1.13347	0.656054	0.837056	0.500298	0.31486	0.456116
Danio_rerio_newGene_14156	0.0563115	0	0.123308	0	0.461171	0.215982
Danio_rerio_newGene_14157	0.671656	0.535988	0.721885	0.71664	0.852012	0.850084
Danio_rerio_newGene_14161	0.6929	0.631252	1.16259	0.805474	0.768251	0.644269
Danio_rerio_newGene_14162	0.245938	0.394008	0.203838	0.208423	0.218108	0.288379
Danio_rerio_newGene_14164	0.24224	0.241089	0.345284	0.369057	0.210247	0.209641
Danio_rerio_newGene_14165	0	0.19925	0.146115	0.158118	0	0
Danio_rerio_newGene_14167	0.347908	0.125861	0.24945	0.258404	0.0853305	0.119623
Danio_rerio_newGene_14169	0.189136	0.745356	0.782864	0.384593	0.441366	0.214273
Danio_rerio_newGene_14172	1.05224	1.49418	1.21447	1.44277	2.00914	1.82681
Danio_rerio_newGene_14181	1.33546	1.15207	1.21046	1.46803	1.12733	1.30299
Danio_rerio_newGene_14186	0.0136945	0.0380945	0.038167	0.26999	0.232147	0.145665
Danio_rerio_newGene_14193	8.54542	18.6623	7.64012	1.24404	0.981705	1.86488
Danio_rerio_newGene_142	0.124965	0.228082	0.0389165	0	0.101926	0.0358725
Danio_rerio_newGene_14200	0.299355	0.216297	0.253431	0.344713	0.279094	0.40969
Danio_rerio_newGene_14224	0.527029	0.644138	0.701431	0.573603	0.554908	0.582886
Danio_rerio_newGene_14235	0.257975	0.232582	0.067797	0	0.0690775	0
Danio_rerio_newGene_14237	0.116725	0.115575	0.131513	0.211013	0.178151	0.0909795
Danio_rerio_newGene_14241	1.3115	1.30786	1.26013	1.42251	2.19501	1.20368
Danio_rerio_newGene_14250	1.59562	2.04883	2.13067	2.21514	1.55388	2.37373
Danio_rerio_newGene_14269	0.0901415	0.076057	0	0	0.093381	0.162568
Danio_rerio_newGene_14279	1.40631	1.57515	1.49588	1.86996	1.31081	1.24156
Danio_rerio_newGene_14284	0.689801	0.893255	0.953623	1.23983	0.809933	0.967441
Danio_rerio_newGene_14288	0.629344	0.766254	0.864707	1.04665	1.30037	0.969116
Danio_rerio_newGene_14299	0.0946775	0	0.331642	0.110097	0.499267	0.321459
Danio_rerio_newGene_143	1.59933	1.33163	1.16348	1.28754	1.09434	1.29685
Danio_rerio_newGene_14304	0.35564	0.610464	0.380857	0.593139	0.604799	0.376368
Danio_rerio_newGene_14311	0	0	0	0.011797	0.317644	0
Danio_rerio_newGene_14313	0	0.100014	0.108013	0.0983155	0.0747675	0.0548455
Danio_rerio_newGene_14315	5.21804	4.40593	5.4436	3.54933	2.63351	3.05873
Danio_rerio_newGene_14320	1.62921	2.55642	2.2166	2.58908	3.34698	1.9662
Danio_rerio_newGene_14323	0.445523	0.718371	0.468615	0.720051	1.15647	0.623897
Danio_rerio_newGene_14328	2.30466	2.55371	2.55001	2.5162	3.78487	2.98
Danio_rerio_newGene_14329	0.12809	0.0243315	0.047875	0.0992775	0.0422345	0.103547
Danio_rerio_newGene_14342	0.110007	0.104627	0.203757	0	0.129471	0.0332425
Danio_rerio_newGene_14357	0.183109	0.651595	0.38002	0.300901	0.780083	0.378599
Danio_rerio_newGene_14360	0.482466	0.705423	1.02872	0.702083	0.68437	0.678554
Danio_rerio_newGene_14367	0.276937	0.376972	0.517475	0.166145	0.365073	0.252586
Danio_rerio_newGene_14374	0.68339	0.896959	1.16339	0.734382	1.226	0.999005
Danio_rerio_newGene_14391	0.334493	0.044102	0.079638	0.0448525	0.136677	0
Danio_rerio_newGene_14396	0.031027	0.0768325	0.046631	0.0187235	0.019064	0.058124
Danio_rerio_newGene_14406	0.803997	0.880252	0.410141	0.563989	0.398763	0.308109
Danio_rerio_newGene_14410	0.258039	0.548188	0.428123	0.389026	0.524914	0.60337
Danio_rerio_newGene_14411	1.1857	1.26672	1.12427	0.977395	1.15279	1.3124
Danio_rerio_newGene_14427	0.711286	0.63718	1.144	1.27366	1.0854	1.31926
Danio_rerio_newGene_14447	3.4747	4.17415	3.75648	3.92422	4.56998	4.34253
Danio_rerio_newGene_14460	0.463881	0.260657	0.047933	0.180186	0.297373	0.255001
Danio_rerio_newGene_14476	0.952841	1.43512	1.04481	1.35356	0.790029	1.86345
Danio_rerio_newGene_14480	0.230029	0.380949	0.236491	0.54093	0.26878	0.604082
Danio_rerio_newGene_14500	0.695094	1.13821	0.323622	0.20029	0.242037	0.294355
Danio_rerio_newGene_14504	1.98038	2.1069	2.3168	2.52265	2.39975	1.92503
Danio_rerio_newGene_14510	2.42831	2.94576	2.67494	2.62783	2.08709	2.38623
Danio_rerio_newGene_14520	1.15964	1.98142	2.46582	1.19859	1.56596	1.65315
Danio_rerio_newGene_14523	0.062789	0.190113	0.0338225	0.054145	0.142657	0.124683
Danio_rerio_newGene_14524	0.0941885	0.285151	0.156288	0.085663	0.306403	0.116956
Danio_rerio_newGene_14529	0.857788	0.812756	0.792895	0.649922	0.723718	0.474766
Danio_rerio_newGene_14532	1.76209	3.26596	1.87074	1.1558	1.68483	1.85884
Danio_rerio_newGene_14543	0	0.124797	0.0222385	0.124718	0	0.042899
Danio_rerio_newGene_14549	0.13401	0.2199	0.208836	0.128855	0.21817	0.158121
Danio_rerio_newGene_14552	0.171519	0.0755385	0.310408	0.170772	0.189054	0.0680255
Danio_rerio_newGene_14561	0.546565	0.666498	0.456202	0.514543	0.657501	0.85617
Danio_rerio_newGene_14566	0.387417	0.421212	0.185779	0.241787	0.175131	0.243899
Danio_rerio_newGene_14568	2.44161	3.18313	2.33516	1.63318	3.21655	2.53267
Danio_rerio_newGene_14572	1.16357	1.54142	1.11381	1.70142	1.64966	1.34269
Danio_rerio_newGene_14573	1.93354	2.70586	2.29842	2.22321	2.78772	2.69885
Danio_rerio_newGene_14576	9.92863	9.75573	9.92156	11.1538	10.6869	8.74341
Danio_rerio_newGene_14577	0.075967	0.15261	0.0896765	0.164291	0.158191	0.067213
Danio_rerio_newGene_14580	7.33437	8.7766	10.1953	11.471	12.3387	12.8433
Danio_rerio_newGene_14592	0.573773	0.794145	1.0967	0.924747	0.691933	0.546814
Danio_rerio_newGene_14616	1.96218	2.92749	3.0748	3.53805	3.56282	3.15859
Danio_rerio_newGene_14619	0.383872	0.385366	0.692592	0.512733	0.541964	0.080691
Danio_rerio_newGene_14621	3.0195	3.27188	2.91598	2.08665	3.44502	3.33866
Danio_rerio_newGene_14624	0.811281	0.935336	1.08249	1.11695	1.36563	1.0881
Danio_rerio_newGene_14625	1.68876	1.59367	1.22181	2.04121	2.65367	2.36965
Danio_rerio_newGene_14628	1.36506	1.5602	1.77802	1.77554	2.36915	1.3482
Danio_rerio_newGene_14629	9.3243	7.9509	9.14552	8.07029	7.35346	5.58423
Danio_rerio_newGene_14630	2.42075	2.60477	3.1981	3.87295	3.82606	2.51396
Danio_rerio_newGene_14631	0.286979	0.326676	0.773486	0.502822	0.555028	0.456634
Danio_rerio_newGene_14632	1.33425	1.11512	0.897049	1.99748	1.9506	2.12588
Danio_rerio_newGene_14633	1.98234	2.32424	1.33147	2.25241	2.47544	2.28394
Danio_rerio_newGene_14636	15.1419	12.9873	16.2049	15.3786	15.5141	18.1636
Danio_rerio_newGene_14637	0.368708	0.566935	0.419804	0.601156	0.591394	0.535918
Danio_rerio_newGene_1464	0.524169	0.356654	0.640599	0.600264	0.451655	0.546509
Danio_rerio_newGene_14641	0.205654	0.52096	0.595903	0.304917	0.573406	0.438083
Danio_rerio_newGene_14643	0.55281	0.811042	0.610364	0.269525	0.428635	0.319196
Danio_rerio_newGene_14644	4.14624	5.39805	8.25932	7.95157	4.26002	3.56663
Danio_rerio_newGene_14645	1.15426	1.25227	0.999097	0.45156	1.19274	1.4055
Danio_rerio_newGene_14649	0	0.108512	0.066131	0.377215	0	0.081815
Danio_rerio_newGene_14651	1.48403	1.78816	1.73199	1.60702	1.93749	1.29235
Danio_rerio_newGene_14652	1.23178	1.19366	1.33476	1.2652	1.63196	1.20733
Danio_rerio_newGene_14653	0.530664	0.585866	0.36891	0.378837	0.403725	0.816863
Danio_rerio_newGene_1466	0	0	0.158211	0	0.101737	0
Danio_rerio_newGene_14668	0.964854	1.24293	0.941061	1.35212	1.81268	1.08855
Danio_rerio_newGene_14681	1.17942	1.12414	1.52313	1.44636	1.72847	1.42646
Danio_rerio_newGene_14687	6.69262	6.83351	9.26582	10.2871	16.3976	13.4476
Danio_rerio_newGene_14692	14.7327	16.8623	21.9338	18.7693	28.3541	17.1699
Danio_rerio_newGene_14693	0.39269	0.348358	0.361528	0.108414	0.437503	0.160698
Danio_rerio_newGene_14698	3.38943	3.09995	3.33308	3.1758	2.05057	4.21716
Danio_rerio_newGene_14712	1.29997	2.45337	1.59944	2.7007	1.75327	1.30967
Danio_rerio_newGene_14718	8.49436	9.8594	10.0638	12.0749	12.152	9.45633
Danio_rerio_newGene_14721	7.31483	7.44592	7.15942	7.7286	7.15574	9.22148
Danio_rerio_newGene_14723	2.44693	2.7103	2.2813	1.76008	2.44045	3.19827
Danio_rerio_newGene_14726	7.17806	8.87998	6.15684	7.65394	10.9083	8.00832
Danio_rerio_newGene_14727	0.796906	1.13746	1.04013	0.70011	0.939195	0.888439
Danio_rerio_newGene_14733	1.18188	1.22718	0.964715	0.838644	0.859871	0.709933
Danio_rerio_newGene_14735	1.63497	1.96882	1.67249	2.16345	2.43196	1.52885
Danio_rerio_newGene_14742	0.413913	0.360775	0.529926	0.699151	0.945839	0.405876
Danio_rerio_newGene_14752	0.0773005	0.127124	0.112072	0.082631	0.100821	0.0241855
Danio_rerio_newGene_14756	3.50587	2.65643	2.56291	3.56339	4.94945	5.22143
Danio_rerio_newGene_14757	11.4872	10.9228	7.95946	9.84939	10.1174	7.49535
Danio_rerio_newGene_14759	6.81774	6.51191	5.44069	5.17634	4.86159	4.2503
Danio_rerio_newGene_14776	0	0.202967	0	0.0822795	0.194718	0.287096
Danio_rerio_newGene_14779	0.116232	0.479117	0.47045	0.442384	0.271533	0.057444
Danio_rerio_newGene_14794	5.17822	5.23905	5.15468	5.63158	4.80428	6.53944
Danio_rerio_newGene_14802	1.19699	0.637227	0.0995165	0	0	0.01783
Danio_rerio_newGene_14805	0.454341	0.255667	1.04049	0.438647	0.52883	1.31253
Danio_rerio_newGene_14811	0.922266	1.92022	1.10356	1.28392	1.75145	2.42779
Danio_rerio_newGene_14828	1.64028	1.81986	1.61343	1.54484	2.17905	1.88678
Danio_rerio_newGene_14835	0.820523	1.35072	0.978295	1.53582	1.50827	2.07505
Danio_rerio_newGene_14839	0.117585	0.100487	0.337809	0.101888	0.149849	0.287447
Danio_rerio_newGene_14856	0.906214	1.22079	1.32381	1.83501	1.58779	2.45605
Danio_rerio_newGene_14861	3.42815	4.06179	3.53486	4.56221	4.8283	5.72271
Danio_rerio_newGene_14863	3.92735	3.38325	4.9925	6.19165	3.54113	7.08385
Danio_rerio_newGene_14866	0.364429	0.500073	0.913053	0.745971	0.54233	0.452404
Danio_rerio_newGene_14868	0.227747	0.347784	0.215836	0.745371	0.238734	0.417939
Danio_rerio_newGene_1487	0.282716	0.0590935	0.0356535	0.047213	0.0109705	0.152757
Danio_rerio_newGene_14878	3.38374	3.72416	5.70615	6.19276	10.925	13.2159
Danio_rerio_newGene_14883	0.850289	1.06977	1.38919	0.912767	0.975837	1.29528
Danio_rerio_newGene_14884	0.169204	0.493181	0.70287	0.89291	0.672751	0.665532
Danio_rerio_newGene_14886	0.071263	0.305073	0.185048	0.274547	0.20811	0
Danio_rerio_newGene_14887	0.231222	0.395664	0.3194	0.43187	0.418251	0.414971
Danio_rerio_newGene_14892	15.4116	14.618	14.5284	14.5539	13.1783	9.79086
Danio_rerio_newGene_14893	2.65794	5.57602	6.80957	7.08138	8.50179	16.055
Danio_rerio_newGene_14895	0	0.577341	0	0.61319	0.766584	0.713557
Danio_rerio_newGene_14897	0.652944	0.457496	1.23447	0.656543	0.702731	1.69642
Danio_rerio_newGene_14913	0.30876	0.836732	0.329971	0.325511	0.353438	0.246565
Danio_rerio_newGene_14917	0.976516	0.813701	0.859963	0.912043	0.970979	0.758869
Danio_rerio_newGene_14922	0.0471085	0.136778	0.022182	0.0223795	0	0.159299
Danio_rerio_newGene_14928	2.23593	1.62622	1.53618	1.58853	1.91066	1.64197
Danio_rerio_newGene_14936	0.064672	0.0878845	0.175277	0.051405	0.103497	0.105105
Danio_rerio_newGene_14937	0.336781	0.286874	0.316582	0.13408	0.484318	0.0397555
Danio_rerio_newGene_1494	1.906	2.15307	1.53366	1.00737	1.46601	1.73352
Danio_rerio_newGene_14947	1.54685	2.21574	1.76969	1.34639	2.53225	2.54222
Danio_rerio_newGene_14951	0.819566	1.48164	1.75836	1.76468	1.93215	2.16709
Danio_rerio_newGene_14974	1.9844	2.78011	2.64708	2.31854	2.90764	2.60176
Danio_rerio_newGene_14976	0.265922	0.42399	0.70168	0.812833	0.480074	0.378234
Danio_rerio_newGene_14980	1.76198	1.44936	1.63958	1.58368	1.61375	1.34289
Danio_rerio_newGene_14983	0.294816	0.493511	0.761629	0.566491	0.170393	0.288838
Danio_rerio_newGene_14996	0	0.0210275	0	0.205004	0	0.070421
Danio_rerio_newGene_14998	0.719526	1.11187	1.8156	1.65553	1.58903	2.42004
Danio_rerio_newGene_15000	1.17722	1.90106	3.31126	1.83543	3.1628	3.32967
Danio_rerio_newGene_15003	0.321086	0.445967	0.392796	0.317539	0.52345	0.384891
Danio_rerio_newGene_15007	0.922524	0.808825	0.804215	0.950199	1.4499	1.39965
Danio_rerio_newGene_15008	0.474579	0.496179	0.476029	0.572528	0.638929	0.6591
Danio_rerio_newGene_15015	0.278222	0.127161	0.235221	0.652988	0.213684	0.393577
Danio_rerio_newGene_15018	0.159537	0.535542	0.165308	0.138078	0.391134	0.19937
Danio_rerio_newGene_15019	0.695008	1.264	0.821679	1.02372	0.976969	0.942203
Danio_rerio_newGene_1503	0.22115	0.466295	0.0903225	0.37381	0.705084	0.916557
Danio_rerio_newGene_15036	0.362788	0.232345	0.252819	0.41826	0.357025	0.153703
Danio_rerio_newGene_15057	0.62917	0.634128	0.928023	0.958467	0.664959	0.523532
Danio_rerio_newGene_15059	0.205584	0.141492	0.0583685	0.300757	0.290529	0.290692
Danio_rerio_newGene_15066	0	0.027521	0.0983765	0.119503	0.076683	0.197299
Danio_rerio_newGene_1507	0.337904	0.861279	0.231366	0.221235	0.375395	0.303045
Danio_rerio_newGene_15074	0.234949	0.375746	0	0.346297	0.053311	0.0637755
Danio_rerio_newGene_15075	2.78466	3.83923	2.81637	2.66105	2.3829	4.50453
Danio_rerio_newGene_15079	0.347048	0.47186	0.346793	1.04991	0.812422	0.588068
Danio_rerio_newGene_15096	0.229007	0.501745	0.172207	0.372323	0.223902	0.267215
Danio_rerio_newGene_15099	0.369194	0	0	0.0679375	0	0
Danio_rerio_newGene_15101	0.126702	0.205176	0.238681	0.173528	0.326489	0.308389
Danio_rerio_newGene_15103	0.109506	0.382622	0.550387	0.510683	0.029095	0.442454
Danio_rerio_newGene_15104	0.175688	0.280355	0.572511	0.546232	0.361753	0.276685
Danio_rerio_newGene_15106	0.133224	0.302229	0.255454	0.46647	0.166266	0.364988
Danio_rerio_newGene_15116	1.65246	2.26282	1.59293	1.83099	1.82929	1.62318
Danio_rerio_newGene_15118	0.0690795	0.12741	0.0878715	0.286955	0.187625	0.708404
Danio_rerio_newGene_15119	0.327886	0.331908	0.499757	0.24303	0.356737	0.44992
Danio_rerio_newGene_15123	0.227692	0.490196	0.528416	0.766685	1.62494	0.927634
Danio_rerio_newGene_15131	0.537655	0.956987	0.877517	1.76847	1.41854	0.827608
Danio_rerio_newGene_15159	26.2579	27.551	22.5065	24.4415	29.8429	20.6832
Danio_rerio_newGene_15177	0.059762	0.176556	0.0395245	0.0817265	0.0533345	0.166099
Danio_rerio_newGene_15180	0.371152	0.812911	0.131873	0.24297	0.242041	0
Danio_rerio_newGene_1519	0.282589	0.5131	0.576752	1.03248	0.335518	0.177038
Danio_rerio_newGene_15212	0.114968	0.106498	0.011771	0.06135	0	0.045503
Danio_rerio_newGene_15215	0.537921	0.61647	0.572005	0.743934	0.455466	0.437566
Danio_rerio_newGene_15218	1.95933	3.25296	1.85935	3.42743	3.16108	2.525
Danio_rerio_newGene_15236	1.76989	1.46807	2.01429	1.68057	1.25608	1.01344
Danio_rerio_newGene_15237	0.555535	0.685275	0.742039	0.406266	0.837168	0.467307
Danio_rerio_newGene_15244	0.494196	0.568237	0.751842	0.706095	0.34311	0.607953
Danio_rerio_newGene_15247	0.625876	0.50825	0.552389	0.914571	0.700289	0.479594
Danio_rerio_newGene_15249	0.94629	0.890261	1.20015	0.989887	1.0513	0.879741
Danio_rerio_newGene_15251	0.321153	0.243664	0.444599	0.336776	0.125962	0.136937
Danio_rerio_newGene_15259	0.176697	0.0903835	0.448338	0.0498235	0.114363	0.0343705
Danio_rerio_newGene_15262	0.583214	0.979004	0.833978	0.464368	0.735284	0.908739
Danio_rerio_newGene_15263	1.46168	1.95634	1.8092	2.03469	2.30995	1.89946
Danio_rerio_newGene_15264	0.223171	0.255865	0.124125	0.178449	0.169675	0.0147825
Danio_rerio_newGene_15266	0.350947	0.318568	0.426877	0.304374	0.292809	0.170625
Danio_rerio_newGene_15269	0.118999	0	0.0731595	0.2288	0.017648	0.0457
Danio_rerio_newGene_15277	0.137129	0.192512	0.505595	0.262003	0.226463	0.0139765
Danio_rerio_newGene_15281	0.090406	0.278843	0	0	0.142411	0.0805195
Danio_rerio_newGene_15293	0.551324	0.503305	0.489117	0.404361	0.638853	0.332965
Danio_rerio_newGene_15295	0.186803	0.323224	0.249865	0.274174	0.143687	0.263466
Danio_rerio_newGene_15317	0.261466	0.26896	0.315097	0.134852	0.27455	0.216806
Danio_rerio_newGene_15320	0	0	0	0	0	0
Danio_rerio_newGene_15322	0.500045	0.565506	0.496698	0.254761	0.292299	0.272718
Danio_rerio_newGene_15323	0.336296	0.0806455	0.908049	0.209506	0.526048	0.443142
Danio_rerio_newGene_15324	0.270064	0	0.240532	0.062469	0.147365	0.021467
Danio_rerio_newGene_15328	0	0	0	0.111964	0.271576	0.0369055
Danio_rerio_newGene_15330	0.147626	0.246165	0.445508	0.341276	0.289971	0.0784135
Danio_rerio_newGene_15331	0.197618	0.39662	0.333193	0.30215	0.330639	0.040576
Danio_rerio_newGene_15332	0.27754	0.255576	0.479502	0.111426	0.361268	0.118551
Danio_rerio_newGene_15334	0.798252	0.56562	0.579353	0.495926	0.35029	0.378907
Danio_rerio_newGene_15344	0.494963	0.407475	0.343773	0.279592	0.288701	0.110559
Danio_rerio_newGene_15345	0.519469	0.599993	0.524819	0.562794	0.440194	0.346274
Danio_rerio_newGene_15346	0.474803	0.714563	0.690985	0.554142	0.521679	0.676877
Danio_rerio_newGene_15347	0.308789	0.12574	0.362951	0.46471	0.291608	0.144762
Danio_rerio_newGene_15348	0.033909	0.198713	0	0	0.365411	0
Danio_rerio_newGene_15349	0.138368	0.666189	0.248101	0.149217	0.531999	0
Danio_rerio_newGene_15355	0.177637	0.035208	0.071914	0	0.1732	0.134538
Danio_rerio_newGene_15359	1.36877	1.55985	1.22265	1.49186	1.03384	0.730775
Danio_rerio_newGene_15367	0.0158045	0	0	0.0190965	0	0.021666
Danio_rerio_newGene_15370	1.98752	5.78303	0.557482	4.98764	3.0238	1.44481
Danio_rerio_newGene_15379	0.131417	0	0.283654	0.146482	0.046193	0.282361
Danio_rerio_newGene_15381	0.108283	0.09502	0.222301	0.317312	0.750679	0.278326
Danio_rerio_newGene_15385	0.0565435	0	0.514039	0	0	0
Danio_rerio_newGene_15386	0.409084	0.420086	0.378614	0.45718	0.214386	0.145466
Danio_rerio_newGene_15401	1.20458	1.02398	1.09243	0.529981	0.478816	0.64357
Danio_rerio_newGene_15404	2.80069	3.46759	2.97861	2.59631	2.99693	3.0098
Danio_rerio_newGene_15406	0.134397	1.11028	0.603588	0.22208	0.653658	0.515722
Danio_rerio_newGene_15413	0.386876	0.192666	0.492023	0.355492	0.30579	0.180002
Danio_rerio_newGene_15417	0.420546	0.443285	0.20786	0.388566	0.220395	0.106293
Danio_rerio_newGene_15419	0.358786	0.410031	0.266715	0.429992	0.094607	0.243373
Danio_rerio_newGene_15423	0	0	0.188878	0.0983065	0	0.169154
Danio_rerio_newGene_15427	0.255329	0.29993	0.202928	0.180376	0.173858	0.119812
Danio_rerio_newGene_15429	1.4131	1.42189	0.476363	1.16443	1.24174	1.572
Danio_rerio_newGene_15430	0.624205	0.97017	0.916594	0.793686	1.03288	0.820068
Danio_rerio_newGene_15431	0.193318	0	0.138803	0	0	0
Danio_rerio_newGene_15434	0	0.204072	0.117225	0.147077	0	0.178744
Danio_rerio_newGene_15436	0.283309	0.738402	0.342852	0.276266	0.421162	0.376835
Danio_rerio_newGene_15437	0.012912	0.10911	0.0322655	0.0644785	0.0536115	0.036488
Danio_rerio_newGene_15440	0	0	0	0	0	0
Danio_rerio_newGene_15443	0.190003	0.428151	0.419563	0.436891	0.440325	0.133541
Danio_rerio_newGene_15445	0.416618	0.212377	0.26243	0.257916	0.309208	0
Danio_rerio_newGene_15446	0.252717	0.644495	0.292984	0.333024	0.187084	0.321974
Danio_rerio_newGene_15448	0.021152	0	0.06635	0.0273275	0	0
Danio_rerio_newGene_1545	1.44211	1.5016	1.28324	1.543	1.46557	1.12267
Danio_rerio_newGene_15451	0.635185	0.584083	0.477586	0.161742	0.551016	0.240884
Danio_rerio_newGene_15453	0.206909	0.34185	0.240576	0.137436	0.178889	0.53276
Danio_rerio_newGene_15456	0.852781	1.03757	0.669509	0.658865	0.713233	0.487789
Danio_rerio_newGene_15457	0.26852	0.12277	0.243172	0.308959	0.0314255	0
Danio_rerio_newGene_15461	0.222981	0.200427	0.201693	0.0753245	0.0987505	0.116832
Danio_rerio_newGene_15462	0.343653	0.628958	0.326014	0.311518	0.415601	0.260363
Danio_rerio_newGene_15463	0.150444	0.114093	0.18153	0.060424	0.0669115	0.13119
Danio_rerio_newGene_15467	1.69335	2.18023	1.62503	2.00596	3.58054	3.14509
Danio_rerio_newGene_15478	0.79169	0.732692	0.642583	1.08612	0.810367	0.701477
Danio_rerio_newGene_15479	0.715645	0.439081	0.565785	0.514736	0.597452	0.487104
Danio_rerio_newGene_15482	1.42897	1.25204	1.14653	0.993708	1.18582	1.3169
Danio_rerio_newGene_15484	1.75308	1.92384	1.40484	1.00805	0.80767	1.32712
Danio_rerio_newGene_15491	4.03374	5.33722	3.77017	3.88966	2.57943	1.91031
Danio_rerio_newGene_15495	0.184633	0.181795	0.079768	0.129406	0.070251	0.053061
Danio_rerio_newGene_15497	1.47599	1.5656	1.40184	1.3274	1.18799	0.960342
Danio_rerio_newGene_15498	0.976534	1.68719	0.780331	1.41953	1.53429	0.837677
Danio_rerio_newGene_15500	0.662926	0.656183	0.868623	0.621826	0.367106	0.422704
Danio_rerio_newGene_15502	0.297923	0.233764	0.26301	0.248014	0.370916	0.418549
Danio_rerio_newGene_15504	0.639194	0.076369	0.428036	0.108686	0.47065	0.694763
Danio_rerio_newGene_15506	0	0.0408995	0.941235	0.243069	0.083106	0
Danio_rerio_newGene_15508	0.112889	0.217969	0.34904	0.178228	0.150459	0.279657
Danio_rerio_newGene_15527	0.177249	0.374628	0.451349	0.250242	0.670804	0.484183
Danio_rerio_newGene_15531	0.35999	0.726198	0.574684	0.422682	0.48712	0.417396
Danio_rerio_newGene_15533	0.0322155	0	0.030606	0.026461	0.039751	0
Danio_rerio_newGene_15534	0.274512	0.362966	0.45358	0.405629	0.263512	0.291627
Danio_rerio_newGene_15554	1.0449	1.5132	1.17887	1.49872	0.879958	0.929272
Danio_rerio_newGene_15555	0.567643	0.986031	1.10452	0.433111	0.669489	0.472258
Danio_rerio_newGene_15557	1.55451	2.15434	1.76259	2.43762	2.50303	2.39004
Danio_rerio_newGene_15560	0.510343	0.44063	0.509246	0.32847	0.450751	0.287498
Danio_rerio_newGene_15561	1.55568	2.47124	2.75753	2.1262	2.99449	2.48606
Danio_rerio_newGene_15567	0.236703	0.334363	0.385389	0.472928	0.306777	0.162205
Danio_rerio_newGene_15574	0.250335	0.425456	0.428111	0.307669	0.149896	0.325294
Danio_rerio_newGene_15576	0.355153	0.463916	0.444808	0.580932	0.584089	0.977116
Danio_rerio_newGene_1558	0.306041	0.340756	0.447146	0.231058	0.326038	0.29559
Danio_rerio_newGene_15580	0.675822	0.632978	0.716112	0.675685	0.689976	0.635966
Danio_rerio_newGene_15581	0.261314	0.225509	0.256334	0.140523	0.141399	0.0953495
Danio_rerio_newGene_15582	0.852	0.918554	0.51946	0.541497	0.26252	0.132532
Danio_rerio_newGene_15595	8.63252	7.55899	9.45102	11.1846	12.1038	10.2713
Danio_rerio_newGene_15597	2.9556	2.6943	2.68743	2.38078	2.67897	2.78557
Danio_rerio_newGene_15598	0.109908	0.171691	0.0237755	0.341469	0.169332	0
Danio_rerio_newGene_15599	1.35459	1.16322	1.67677	1.60593	1.94716	1.5675
Danio_rerio_newGene_15600	1.38225	1.51427	1.66249	1.38989	1.50984	1.56034
Danio_rerio_newGene_15601	1.55342	1.40585	1.75691	1.4891	1.92128	1.12007
Danio_rerio_newGene_15602	0.016901	0.014571	0	0.118986	0.122921	0.41711
Danio_rerio_newGene_15605	0.440494	0.83091	0.517803	0.473696	0.735261	0.355893
Danio_rerio_newGene_15607	0.548342	0.920678	0.570974	0.723744	0.649389	0.451855
Danio_rerio_newGene_15608	1.31838	1.84037	1.94924	1.78817	1.67279	1.42093
Danio_rerio_newGene_15609	3.764	3.80352	3.93657	3.65101	3.59481	3.60473
Danio_rerio_newGene_15610	0.703592	0.615506	0.637995	0.408855	0.432231	0.275608
Danio_rerio_newGene_15611	0.556382	0.915193	0.416093	0.63884	0.764423	0.703106
Danio_rerio_newGene_15612	1.20567	1.19364	1.09832	1.17306	1.36619	0.949021
Danio_rerio_newGene_15614	0.0494195	0.0157715	0.237907	0.0950495	0.426522	0.062364
Danio_rerio_newGene_15615	1.48055	1.62852	1.84309	1.94722	1.44485	1.20023
Danio_rerio_newGene_15617	0.357607	0.456302	0.366893	0.247353	0.293905	0.564098
Danio_rerio_newGene_15618	0.328256	0.538666	0.427151	0.531397	0.660112	0.448861
Danio_rerio_newGene_15623	0.028926	0.340425	0.236861	0.0489925	0.178181	0.150488
Danio_rerio_newGene_15624	0	0	0	0	0.160912	0.261892
Danio_rerio_newGene_15636	0.598612	0.835131	0.599111	1.01441	1.36376	0.856353
Danio_rerio_newGene_15638	0.600002	0.781513	0.563726	0.676773	0.911891	0.881504
Danio_rerio_newGene_15639	1.30448	1.54384	1.55709	1.17347	1.70488	1.56832
Danio_rerio_newGene_15646	1.79427	2.47406	1.83277	2.88627	2.39289	1.78658
Danio_rerio_newGene_15647	0.279785	0.333384	0.438034	0.595354	0.287396	0.0790095
Danio_rerio_newGene_15649	1.20069	0.663907	1.00416	1.39362	1.63455	1.74865
Danio_rerio_newGene_15650	1.69084	0.887749	1.91799	2.33578	2.03056	1.58196
Danio_rerio_newGene_15654	3.09186	3.12373	3.20204	3.63661	3.04499	2.55598
Danio_rerio_newGene_15657	0.335777	0.526594	0.524737	0.46867	0.249345	0.396985
Danio_rerio_newGene_15659	0.130562	0.109652	0.135909	0.0412695	0.099413	0
Danio_rerio_newGene_15660	3.09368	3.21925	3.07067	3.01066	3.16614	2.55842
Danio_rerio_newGene_15661	0.0299435	0.837793	0.205358	0.0381335	0.021352	0.109757
Danio_rerio_newGene_15663	0	0.094603	0.325192	0.211625	0.055377	0.202012
Danio_rerio_newGene_15665	1.21126	2.20763	1.33558	1.09879	1.84739	1.65807
Danio_rerio_newGene_15669	4.63954	2.85429	2.0475	2.65738	1.91221	1.16977
Danio_rerio_newGene_15672	0.682662	0.551941	0.263963	0.606091	0.646067	0.384079
Danio_rerio_newGene_15695	0.910442	0.979292	2.01245	0.519607	0.347712	0.765091
Danio_rerio_newGene_1570	0.8968	0.906434	0.681686	0.902616	1.25425	1.1329
Danio_rerio_newGene_15709	0	0	0	0.104333	0.049153	0
Danio_rerio_newGene_15737	0.825508	0.741007	0.469944	0.776714	0.648114	0.669952
Danio_rerio_newGene_15739	0.740722	0.442734	0.558708	0.432763	0.503406	0.366687
Danio_rerio_newGene_15744	1.67378	2.07862	2.26247	1.51872	2.01754	1.5926
Danio_rerio_newGene_15746	8.48891	4.96743	8.19021	4.47179	5.10396	5.38036
Danio_rerio_newGene_15747	6.3552	6.12618	4.06011	6.34586	4.0639	3.70642
Danio_rerio_newGene_15748	0.451868	0.515602	0.523247	0.51501	0.596966	0.53907
Danio_rerio_newGene_15749	3.62098	3.52895	4.65584	4.36526	4.29345	4.26307
Danio_rerio_newGene_15753	0.478485	0.543176	0.51754	0.540436	0.395598	0.510551
Danio_rerio_newGene_15756	0.381882	0.264757	0.253464	0.520649	0.522834	0.743722
Danio_rerio_newGene_15769	6.24402	6.16148	5.81646	6.03309	7.63792	7.14618
Danio_rerio_newGene_15779	7.41286	7.08964	6.46912	6.62505	7.35731	7.84802
Danio_rerio_newGene_15781	1.28836	1.36122	1.13665	1.62191	1.1085	1.20039
Danio_rerio_newGene_15782	3.58124	3.35285	2.59613	2.48287	3.59917	2.85034
Danio_rerio_newGene_15783	2.10373	2.3508	2.46834	2.74027	2.96812	2.61875
Danio_rerio_newGene_15788	0.432213	0.716325	0.582371	0.687651	0.497204	0.38802
Danio_rerio_newGene_1579	0.226897	0.0169105	0.06865	0.064316	0.125058	0.0403185
Danio_rerio_newGene_15796	0.757764	0.702676	0.798118	0.986294	0.93807	1.05411
Danio_rerio_newGene_15806	0.645141	0.873045	0.445381	1.23228	2.52156	1.14786
Danio_rerio_newGene_15807	4.54962	2.08905	3.74687	7.72834	9.12081	6.03422
Danio_rerio_newGene_15809	16.7908	23.5579	34.5389	25.5873	21.2459	29.1409
Danio_rerio_newGene_15817	3.91665	3.89473	4.56191	4.78279	4.47558	4.13677
Danio_rerio_newGene_15824	1.12575	1.44935	1.52532	1.32361	1.7295	1.23326
Danio_rerio_newGene_15827	0.543185	1.69367	1.9193	1.43273	1.65594	0.786697
Danio_rerio_newGene_15830	1.73874	1.85112	1.95706	1.73485	2.86895	1.29358
Danio_rerio_newGene_15834	1.18719	1.15122	1.18961	1.1288	1.18571	1.3942
Danio_rerio_newGene_15838	2.24673	2.48924	1.8819	2.0442	2.803	2.01233
Danio_rerio_newGene_15855	0.967785	0.990253	1.0922	1.08225	1.1239	1.18494
Danio_rerio_newGene_15858	1.20171	2.07533	1.57833	1.6786	1.8171	1.63381
Danio_rerio_newGene_15870	1.83097	1.48735	2.22047	1.95078	1.95769	1.61446
Danio_rerio_newGene_15879	0.564359	0.51673	0.57997	0.719132	1.14614	1.06974
Danio_rerio_newGene_15880	2.48682	3.01993	1.92637	3.04914	2.84082	2.27146
Danio_rerio_newGene_15881	0.752629	0.583449	0.27274	0.422544	0.452446	0.215433
Danio_rerio_newGene_15884	1.71089	1.8325	1.53815	1.66691	1.43616	1.31025
Danio_rerio_newGene_15885	2.81634	1.88708	1.48153	1.94737	2.86322	2.88905
Danio_rerio_newGene_15889	0.806372	0.332694	0.403649	0.260847	0.388223	0.192097
Danio_rerio_newGene_15892	0.328789	0	0.190967	0.127214	0.142306	0.175291
Danio_rerio_newGene_15893	1.00255	0.307605	0.604825	0.399763	0.335338	0.349743
Danio_rerio_newGene_15896	0.426187	0.463778	0.583681	0.518093	0.187243	0.34148
Danio_rerio_newGene_15897	0.914575	1.17417	0.865363	0.938323	1.21786	1.29456
Danio_rerio_newGene_15898	0.397323	0.431038	0.25708	0.283303	0.229367	0.257863
Danio_rerio_newGene_15901	2.68393	4.16413	3.79938	2.63179	1.74024	1.94168
Danio_rerio_newGene_15902	17.0094	17.5005	6.72212	12.6838	10.2452	15.7626
Danio_rerio_newGene_15903	1.10245	1.09485	1.18568	1.22749	0.943738	1.18199
Danio_rerio_newGene_15905	0	0.121899	0.13612	0	0.102114	0.362165
Danio_rerio_newGene_15907	0.289627	0.248684	0.28428	0.342775	0.248	0.215911
Danio_rerio_newGene_15908	0.342712	0.306871	0.414122	0.254346	0	0
Danio_rerio_newGene_15915	0.112138	0.0542985	0.556306	0.733921	0.464555	0.767539
Danio_rerio_newGene_15921	118.846	70.8957	100.851	75.1719	82.0583	109.639
Danio_rerio_newGene_15925	2.14247	2.29267	1.84901	2.05808	3.69032	2.34362
Danio_rerio_newGene_15929	0	0.0641195	0.0210645	0.338943	0	0
Danio_rerio_newGene_15934	0.973973	1.02873	1.78324	1.25641	1.46919	1.21281
Danio_rerio_newGene_15935	2.2581	1.87534	2.09518	1.93302	1.92239	2.18652
Danio_rerio_newGene_15946	0.168218	0.182878	0.167553	0.219785	0.167664	0.174252
Danio_rerio_newGene_15966	4.87709	4.94792	4.17895	4.57045	6.47964	4.56137
Danio_rerio_newGene_15975	0.964484	0.979838	1.15959	1.00287	1.31653	1.021
Danio_rerio_newGene_16023	0	0	0	0	0	0.211904
Danio_rerio_newGene_16025	2.30702	2.21695	2.49288	2.07379	2.18014	2.15974
Danio_rerio_newGene_16045	2.79005	3.70732	2.80784	4.09063	5.75452	5.94949
Danio_rerio_newGene_16055	6.32012	10.3303	11.8751	16.0635	16.4752	16.0504
Danio_rerio_newGene_16060	9.85045	12.3401	17.4184	20.6795	23.4605	28.5504
Danio_rerio_newGene_16066	0.994579	0.766529	0.378799	0.653493	0.96261	0.210316
Danio_rerio_newGene_16071	3.03572	3.49939	3.31214	2.27972	1.94693	1.63047
Danio_rerio_newGene_16103	0.375605	0.41071	1.18469	0.192313	0.395706	0.249753
Danio_rerio_newGene_16104	1.59112	2.47589	1.67675	1.36821	3.01763	2.58868
Danio_rerio_newGene_16112	7.04991	8.59948	7.27624	8.70463	10.8315	5.92785
Danio_rerio_newGene_16115	0	0.0996235	0.120231	0.238217	0.05529	0
Danio_rerio_newGene_16121	4.20688	7.45672	4.85154	4.31555	6.53738	5.94385
Danio_rerio_newGene_16128	6.08172	6.4506	5.2036	4.94956	8.08972	10.7987
Danio_rerio_newGene_16129	0.460503	0.534506	0.392964	0.241963	0.504501	0.321481
Danio_rerio_newGene_16133	1.77736	1.87958	1.46619	1.33037	1.3998	1.60798
Danio_rerio_newGene_16151	0.844309	0.83311	0.529625	1.27217	0.618145	1.20258
Danio_rerio_newGene_16154	1.06036	0.942218	0.548264	1.05438	0.81367	1.04167
Danio_rerio_newGene_16155	2.24945	2.288	2.1986	2.12116	1.50959	1.46521
Danio_rerio_newGene_16157	1.16935	1.08269	0.77123	1.08492	0.925851	0.639444
Danio_rerio_newGene_16159	1.10625	0.404446	0.371514	0.858926	0.848529	0.394212
Danio_rerio_newGene_16163	0	0.0965745	0.362202	0	0.191109	0.076052
Danio_rerio_newGene_16170	1.04607	1.0008	0.894673	1.099	0.766351	1.39795
Danio_rerio_newGene_16173	3.20087	3.38096	2.66548	2.42503	3.12864	2.27236
Danio_rerio_newGene_16177	10.4731	14.2957	10.104	14.4408	16.385	17.8702
Danio_rerio_newGene_16179	0	0.0544205	0	0.0214315	0	0.57015
Danio_rerio_newGene_16182	6.83469	8.45127	7.46578	5.51411	5.9231	6.76178
Danio_rerio_newGene_16183	0.695561	0.604823	0.46476	0.367128	0.537403	0.467705
Danio_rerio_newGene_16212	0.240696	0.259061	0.341785	0.445755	0.220958	0.469202
Danio_rerio_newGene_16217	1.49702	1.59286	2.09557	1.57917	2.16109	1.31975
Danio_rerio_newGene_16225	0.179103	0.167067	0.223094	0.304115	0.133871	0.059165
Danio_rerio_newGene_16228	0.0521805	0.198417	0.042042	0.130689	0.071746	0.0712455
Danio_rerio_newGene_16255	0.173012	0.201655	0.11755	0.022885	0.234595	0.103512
Danio_rerio_newGene_16257	9.25212	9.40775	9.577	6.92818	5.8608	6.8567
Danio_rerio_newGene_16265	0.502835	0.442334	0.262221	0.457282	0.460635	0.30818
Danio_rerio_newGene_16274	6.99114	5.8743	7.2623	8.5908	8.96369	7.79559
Danio_rerio_newGene_1629	0.086341	0.709067	0.612937	1.22916	0.580663	0.473404
Danio_rerio_newGene_16304	1.35663	2.44514	1.41256	2.44792	2.84053	3.60519
Danio_rerio_newGene_16313	1.5789	2.05886	1.79701	1.47827	2.23696	1.82534
Danio_rerio_newGene_16316	1.01946	0.783166	1.28433	0.727573	0.697746	1.51551
Danio_rerio_newGene_16321	0.268568	0.340558	0.236379	0.171075	0.484137	0.035058
Danio_rerio_newGene_16333	0.460074	0.417993	0.283064	0.221915	0.294778	0.330612
Danio_rerio_newGene_16344	0.272085	0.278714	0.220557	0.145487	0.118268	0.0852845
Danio_rerio_newGene_16347	0.111328	0	0	0	0	0
Danio_rerio_newGene_16351	2.66628	1.55552	1.30959	1.97388	1.21548	1.75747
Danio_rerio_newGene_16355	0.189445	0.068359	0.045518	0.070069	0.216596	0.0845185
Danio_rerio_newGene_16368	0.100253	0.0876685	0.210561	0	0.177391	0
Danio_rerio_newGene_16372	0	0.050502	0	0	0.189175	0
Danio_rerio_newGene_16373	13.1336	17.0508	23.0535	26.579	30.4845	33.8277
Danio_rerio_newGene_16403	0.213909	0.110582	0.180095	0.10761	0.142688	0.095845
Danio_rerio_newGene_16404	26.8133	35.355	44.713	50.2107	58.1105	65.4937
Danio_rerio_newGene_16415	2.00447	2.04872	1.42334	1.74958	2.18303	1.91277
Danio_rerio_newGene_16416	24.3716	33.4405	39.3995	47.4299	51.3394	56.0664
Danio_rerio_newGene_1645	0.486021	0.307074	0.431326	0.506104	0.376628	0.355913
Danio_rerio_newGene_16466	0.239947	0.425138	0.216653	0.262267	0.276292	0.47344
Danio_rerio_newGene_1647	0.936852	1.65252	1.60416	2.1789	1.97361	2.3489
Danio_rerio_newGene_16473	12.3776	14.2804	14.5732	15.0705	16.4441	16.3384
Danio_rerio_newGene_16480	1.60044	1.1856	1.49077	0.961597	0.59042	1.13025
Danio_rerio_newGene_16481	0.751448	0.29383	0.647057	0.36863	0.129939	0.332616
Danio_rerio_newGene_16487	29.0727	32.7732	31.8796	31.1511	23.7674	21.5489
Danio_rerio_newGene_16488	0.861158	1.32966	1.1298	1.37738	1.55561	1.06706
Danio_rerio_newGene_1650	0.0138705	0.005303	0.050918	0.067314	0.114816	0.988201
Danio_rerio_newGene_1651	0.253197	0.354012	0.43815	0.349077	0.569381	1.03634
Danio_rerio_newGene_16514	0.694687	0.546718	0.447066	0.606693	0.453788	0.638661
Danio_rerio_newGene_16515	1.00679	0.40498	0.404502	0.434902	0.332364	0.573418
Danio_rerio_newGene_16517	0.214765	0.09857	0.203539	0.199234	0.247832	0.307044
Danio_rerio_newGene_16520	0.226223	0.086629	0.0338495	0.258288	0.213557	0.320767
Danio_rerio_newGene_16521	0	0.525994	0.392574	0.370942	0.0631935	0.138623
Danio_rerio_newGene_16546	3.37546	4.89214	1.87105	4.95912	5.61465	2.68515
Danio_rerio_newGene_16552	0.0619225	0.070826	0	0	0	0.025626
Danio_rerio_newGene_16578	0.245824	0.338078	0.50707	0.449769	0.438729	0.518724
Danio_rerio_newGene_1658	0.0249735	0.171109	0	0	0.100595	0
Danio_rerio_newGene_16586	3.32627	3.28809	2.13798	3.70569	4.80066	5.84467
Danio_rerio_newGene_16599	4.80811	4.8265	4.43112	4.30896	3.93519	3.2488
Danio_rerio_newGene_16603	0.193139	0.300566	0.305324	0.552467	0.412382	0.324046
Danio_rerio_newGene_16618	1.34718	1.97373	2.03435	1.81834	2.48987	1.87995
Danio_rerio_newGene_16626	0.143113	0	0.133688	0	0	0.0446605
Danio_rerio_newGene_16647	0.137449	0	0.0482865	0.123855	0	0.129428
Danio_rerio_newGene_16651	0.302597	0.356123	0.31381	0.370988	0.224343	0.149143
Danio_rerio_newGene_16660	2.39103	2.50153	2.63358	2.45495	3.33401	2.72579
Danio_rerio_newGene_16667	0.223629	0.617275	0.703339	0.330354	0.60193	0.631094
Danio_rerio_newGene_16732	0.74336	1.14167	0.485644	1.05251	1.40141	0.331484
Danio_rerio_newGene_16738	0.388325	0.119078	0.070757	0.089829	0.316139	0.0621435
Danio_rerio_newGene_16739	0.117163	0.290428	0.143457	0.298793	0.0790065	0.308849
Danio_rerio_newGene_16779	0.442507	0.386564	0.554961	0.66382	0.669477	0.159466
Danio_rerio_newGene_16793	0.195227	0.364611	0.418171	0.398459	0.308766	0.316339
Danio_rerio_newGene_16794	0.158551	0.083969	0.409627	0.275332	0.196097	0.224869
Danio_rerio_newGene_1680	0.114205	0.227527	0.020704	0.069007	0.0947885	0.151184
Danio_rerio_newGene_16804	0.75068	1.2014	1.71647	1.41495	1.67136	1.97436
Danio_rerio_newGene_16806	4.33159	4.44054	3.61238	4.88866	5.37709	4.29957
Danio_rerio_newGene_16810	0.312681	0.234646	0.319887	0.265359	0.177643	0.153214
Danio_rerio_newGene_16811	1.82073	1.91445	1.2266	2.15474	1.71574	1.23356
Danio_rerio_newGene_16821	0	0	0	0	0.0517075	0.122628
Danio_rerio_newGene_16824	1.00257	0.989617	1.09488	1.01654	0.866226	0.745473
Danio_rerio_newGene_16837	0	0	0	0	0	0
Danio_rerio_newGene_16857	0	0.021822	0.122795	0.247913	0.455519	0.026241
Danio_rerio_newGene_16860	1.41334	1.34307	1.67841	1.5315	1.91882	2.20167
Danio_rerio_newGene_16861	5.2487	7.02149	7.55767	6.45048	8.36276	12.197
Danio_rerio_newGene_16863	2.39721	1.88654	2.46672	2.64821	3.06488	2.50746
Danio_rerio_newGene_16870	2.37352	2.37712	1.31883	1.79694	1.20025	2.32108
Danio_rerio_newGene_16872	1.07309	0.914869	0.757756	0.628311	0.544602	0.673723
Danio_rerio_newGene_16884	0.408582	0.365912	0.360288	0.353359	0.302526	0.406328
Danio_rerio_newGene_1689	0.0441065	0.12055	0.0854425	0.0864935	0	0
Danio_rerio_newGene_16894	0.183997	0.40251	0.166415	0.299006	0.189325	0.226464
Danio_rerio_newGene_16896	0.236172	0.330941	0	0.100228	0	0
Danio_rerio_newGene_16915	0.977267	0.658742	1.06226	1.01172	1.51087	1.22625
Danio_rerio_newGene_16932	0.307854	0.14511	0.02595	0.338535	0	0.183859
Danio_rerio_newGene_16935	0.295845	0.254803	0.176293	0.239976	0.213785	0.182933
Danio_rerio_newGene_16938	0.152266	0	0.348274	0.19873	0.684973	0.235091
Danio_rerio_newGene_16947	0.106092	0.123871	0.013254	0.056032	0.0830845	0.132322
Danio_rerio_newGene_16951	0.0360765	0.0617925	0	0.121594	0.095551	0
Danio_rerio_newGene_16953	2.47098	2.24745	2.25483	2.5449	2.44391	1.80144
Danio_rerio_newGene_16956	1.11226	1.1645	1.18448	0.938949	1.44164	1.27826
Danio_rerio_newGene_1696	1.79633	1.84887	1.61158	1.5674	2.12536	2.0511
Danio_rerio_newGene_16966	2.25182	2.55784	2.19222	1.71611	1.6959	1.50759
Danio_rerio_newGene_16968	5.02885	6.09539	6.18363	6.32315	5.31561	6.05764
Danio_rerio_newGene_16969	0.680182	0.847066	0.811557	0.315775	0.27665	0.374137
Danio_rerio_newGene_16987	2.43469	2.86713	2.83566	2.84117	3.25888	2.54126
Danio_rerio_newGene_16991	5.97952	5.13285	2.82279	1.32973	2.47154	4.76362
Danio_rerio_newGene_16992	1.43552	1.66107	0.501333	0.395238	0.9326	1.63172
Danio_rerio_newGene_16998	0.624888	0.561227	0.57024	0.884356	0.598309	0.445935
Danio_rerio_newGene_17000	4.71573	6.02209	5.74295	5.82075	7.14478	5.88476
Danio_rerio_newGene_17014	3.53672	4.84356	3.82642	5.1041	1.91694	4.00286
Danio_rerio_newGene_17016	0.12553	0.160981	0.177708	0.138161	0.374192	0.287103
Danio_rerio_newGene_17019	3.16201	4.2006	3.35717	3.66026	4.90678	4.18899
Danio_rerio_newGene_1702	0	0	0.17628	0.121886	0.0801685	0.295577
Danio_rerio_newGene_17028	1.01439	1.07384	0.87805	0.852706	0.840808	0.834961
Danio_rerio_newGene_17029	2.47027	2.59619	2.03089	1.93892	2.12962	2.04064
Danio_rerio_newGene_17033	1.97378	1.04165	0.787494	0.336904	0.734448	1.85963
Danio_rerio_newGene_17035	11.5715	15.7674	10.8197	4.94022	2.82746	5.67232
Danio_rerio_newGene_17037	1.06352	0.738329	0.858993	1.15263	1.61292	2.11359
Danio_rerio_newGene_17041	0.241405	0.202296	0.236229	0.29553	0.219993	0.305924
Danio_rerio_newGene_17044	8.18732	6.18984	5.17967	5.22121	6.71443	4.44816
Danio_rerio_newGene_1705	7.17275	6.08364	6.27664	5.79613	4.71779	4.59098
Danio_rerio_newGene_17050	1.00155	1.48297	0.891408	0.612567	0.67938	1.05901
Danio_rerio_newGene_17054	2.15953	1.06012	1.14008	1.20891	1.55893	1.65418
Danio_rerio_newGene_1706	0.226879	0	0	0	0	0
Danio_rerio_newGene_17066	0.765671	0.827573	0.766035	0.891476	0.712473	0.679689
Danio_rerio_newGene_17070	2.46883	2.44551	2.03502	2.41661	3.53514	1.89318
Danio_rerio_newGene_17071	1.56244	0.88527	0.9049	0.865891	0.863825	0.873839
Danio_rerio_newGene_1709	2.67814	4.35889	4.25287	5.15185	4.02018	2.60227
Danio_rerio_newGene_17097	1.42819	1.35874	1.37815	1.04921	1.26679	1.34466
Danio_rerio_newGene_17099	1.02004	1.24904	1.26035	1.13143	0.413488	0.329071
Danio_rerio_newGene_171	0.987704	1.32747	0.986303	1.37774	1.54343	1.31597
Danio_rerio_newGene_1710	25.5504	26.3098	28.664	22.1033	18.5899	15.9496
Danio_rerio_newGene_17102	1.29777	1.10766	0.876947	1.38722	0.972255	0.815616
Danio_rerio_newGene_17103	1.54066	1.20793	0.879736	1.20345	1.12858	0.603397
Danio_rerio_newGene_17104	0.974298	1.31677	0.877892	0.363642	0.633341	0.261579
Danio_rerio_newGene_17105	1.2024	1.4903	1.68568	1.63651	1.13055	1.20901
Danio_rerio_newGene_17106	0.647003	0.656479	0.591951	0.487698	0.551169	0.243468
Danio_rerio_newGene_17108	5.76845	6.3353	6.56439	6.67722	8.56777	9.23328
Danio_rerio_newGene_17112	0.625206	1.06984	0.708166	1.21436	0.689221	1.55382
Danio_rerio_newGene_17114	12.622	10.3455	10.7141	11.6324	9.56658	11.8338
Danio_rerio_newGene_17116	6.46949	5.58577	5.29297	5.86078	4.45402	3.65371
Danio_rerio_newGene_17117	8.78796	7.23652	6.90242	7.86497	7.186	7.47418
Danio_rerio_newGene_17118	1.97666	1.84849	1.30212	1.58965	3.76155	2.78795
Danio_rerio_newGene_17136	2.29615	1.62589	1.74682	1.93838	1.88489	2.12657
Danio_rerio_newGene_17139	5.38786	7.1195	7.12937	8.05357	7.35478	10.7172
Danio_rerio_newGene_1714	0.0249975	0.0964975	0.164471	0.105917	0.151501	0.0219055
Danio_rerio_newGene_17141	1.70676	1.33944	1.48009	2.05235	2.07617	1.779
Danio_rerio_newGene_17148	8.44128	8.4622	8.4501	8.53259	10.5744	8.10506
Danio_rerio_newGene_17151	0.285166	0.893024	0.56794	0.698563	0.645416	0.544944
Danio_rerio_newGene_17154	2.31412	2.38889	2.34704	2.19869	2.09578	2.1469
Danio_rerio_newGene_17162	1.44606	1.66024	1.39249	1.29183	0.972602	1.4695
Danio_rerio_newGene_17163	1.54064	1.09804	2.10102	1.40814	1.42406	1.04001
Danio_rerio_newGene_17164	0.227096	0.228346	0.186984	0.204586	0.355177	0.262728
Danio_rerio_newGene_17166	0	0.103906	0.258941	0.324651	0.123726	0.0452875
Danio_rerio_newGene_17169	2.44809	2.40199	2.62352	2.62063	2.69775	2.55392
Danio_rerio_newGene_1717	0.0902205	0.208339	0.0661225	0.131044	0.0310385	0.038867
Danio_rerio_newGene_17170	0.04093	0.012468	0.0259005	0	0.0378405	0.0301275
Danio_rerio_newGene_17175	5.1262	7.34254	6.15672	4.37038	4.17299	6.63631
Danio_rerio_newGene_17180	0.824019	0.426803	0.50534	0.543665	0.685921	0.314706
Danio_rerio_newGene_17185	0.039944	0	0.070206	0.215263	0.075816	0
Danio_rerio_newGene_17190	1.1532	0.700222	0.387652	0.572193	0.493683	0.446288
Danio_rerio_newGene_17209	2.78705	2.91141	2.31559	2.84818	3.74629	3.4201
Danio_rerio_newGene_17222	3.13101	3.1132	2.96404	2.71378	2.87269	2.45533
Danio_rerio_newGene_17223	1.17643	1.52078	1.25575	1.19333	1.46511	1.51844
Danio_rerio_newGene_17234	3.83561	3.82479	1.59034	4.46359	5.20008	1.02188
Danio_rerio_newGene_17236	1.32529	1.26923	1.22965	1.34934	1.31253	1.39298
Danio_rerio_newGene_17237	5.1169	5.92521	4.87253	5.49904	7.08613	4.91142
Danio_rerio_newGene_17238	2.90751	3.10386	3.50657	3.77549	4.28619	3.81683
Danio_rerio_newGene_17250	3.5539	4.82287	4.73137	4.21958	6.49379	7.20108
Danio_rerio_newGene_17266	4.08928	4.06099	3.81128	3.88534	4.57055	4.39159
Danio_rerio_newGene_17269	0.252719	0.410099	0.715741	0.512006	0.644937	0.281089
Danio_rerio_newGene_17274	1.95387	2.22045	2.28406	2.13282	3.35428	2.64085
Danio_rerio_newGene_17303	0.139026	0.148869	0.324365	0.146632	0.14512	0.151901
Danio_rerio_newGene_17305	1.28804	1.45587	1.10057	1.27942	1.83458	1.50955
Danio_rerio_newGene_17312	3.99349	4.32784	4.71334	4.38795	4.82783	5.70687
Danio_rerio_newGene_17325	10.0281	9.18769	4.7171	4.20293	8.48921	3.45277
Danio_rerio_newGene_17330	0.113341	0.040352	0.117135	0.0679335	0.190863	0.14484
Danio_rerio_newGene_17337	1.96979	3.35605	2.21814	2.61013	3.22407	4.00429
Danio_rerio_newGene_1734	0.589139	0.677642	0.71865	1.02737	0.851302	1.34617
Danio_rerio_newGene_17367	1.71496	2.59931	2.02832	1.95106	1.88521	1.53644
Danio_rerio_newGene_17385	0.620535	0.742074	0.64239	0.691515	0.671801	0.53659
Danio_rerio_newGene_17399	1.29605	1.48418	1.21418	1.49341	1.60057	1.74561
Danio_rerio_newGene_17449	2.05136	2.20555	2.00625	1.58725	2.26496	2.20999
Danio_rerio_newGene_17473	0.177334	0.175276	0.0811285	0.367519	0.51815	0.170455
Danio_rerio_newGene_17502	3.51509	4.55665	4.26736	3.24476	3.5362	2.29535
Danio_rerio_newGene_17511	0.713062	1.0034	0.773251	1.34869	0.625684	1.13759
Danio_rerio_newGene_17513	3.57954	4.4039	6.84696	4.86761	5.08868	4.55907
Danio_rerio_newGene_17520	0.834179	1.43916	1.52305	1.16308	1.32031	1.844
Danio_rerio_newGene_17545	0.0659485	0	0.262053	0	0	0
Danio_rerio_newGene_17547	0.236409	0.456572	0.198142	0.326908	0.27396	0.277141
Danio_rerio_newGene_17564	0.219329	0.193575	0.20062	0.0275845	0.137116	0.120417
Danio_rerio_newGene_1759	0.239566	0.376224	0.25432	0.323827	0.218583	0.502514
Danio_rerio_newGene_176	2.30325	2.12483	1.87609	1.76519	1.50611	1.03532
Danio_rerio_newGene_17602	2.82769	2.65035	2.08475	2.77699	2.51124	2.21574
Danio_rerio_newGene_17619	0.173414	0	0.13096	0	0.0641605	0
Danio_rerio_newGene_17621	0.10104	0.447842	0.324615	0.0952235	0.191884	0.109768
Danio_rerio_newGene_17626	0.846091	1.03503	1.27525	0.763246	1.04221	0.847474
Danio_rerio_newGene_1766	4.15216	3.65475	3.26204	3.68925	3.21862	3.19284
Danio_rerio_newGene_17664	0.124106	0.221992	0.187018	0.354448	0.283651	0.30082
Danio_rerio_newGene_17667	0.201826	0.090188	0.34555	0.33315	0	0.0827665
Danio_rerio_newGene_1767	0.169488	0.156628	0.0991855	0.120759	0.207333	0.149843
Danio_rerio_newGene_17683	0.571676	0.408104	0.614267	0.229134	0.223988	0.202096
Danio_rerio_newGene_17686	0.169174	0.532082	0.118699	0.511004	0.284007	0.369947
Danio_rerio_newGene_17699	0.0486565	0.0889455	0.103747	0.191984	0.228976	0.235596
Danio_rerio_newGene_177	2.48963	1.79322	2.05877	1.65838	1.53021	1.43646
Danio_rerio_newGene_17706	2.12114	2.34936	2.57346	2.55462	2.87665	2.11424
Danio_rerio_newGene_17717	0.511386	0.955744	0.674896	0.544809	1.00364	1.19695
Danio_rerio_newGene_17731	0.461438	0.389561	0.4323	0.44408	0.691008	0.505968
Danio_rerio_newGene_17739	0.452063	0.157203	0.377522	0.237856	0.186445	0.521149
Danio_rerio_newGene_17756	0.495387	0.309231	0.579214	0.43213	0.482783	0.431394
Danio_rerio_newGene_17765	0.530556	0.686547	0.655015	0.481333	0.635491	0.176357
Danio_rerio_newGene_17773	2.06573	1.96485	2.20674	1.76105	2.22635	1.83644
Danio_rerio_newGene_17775	1.20476	1.25284	1.82937	1.30508	1.34574	1.10031
Danio_rerio_newGene_17783	0.449755	0.82801	0.50342	0.688871	1.35108	1.09971
Danio_rerio_newGene_17788	0.76844	0.870224	0.878514	0.847962	0.771311	0.816915
Danio_rerio_newGene_17802	0.176726	0.175308	0.156193	0.11186	0.2127	0.0827335
Danio_rerio_newGene_17815	0.683737	0.626866	0.891569	0.599784	0.792959	0.351629
Danio_rerio_newGene_17822	0.036335	0.475413	0.559195	0.253794	0.385203	0.636779
Danio_rerio_newGene_17828	0.779771	1.36245	0.815722	0.920087	0.961955	0.848645
Danio_rerio_newGene_17855	0.760801	0.608105	0.682365	0.181104	0.286622	0.434508
Danio_rerio_newGene_17863	0.456311	0.668253	0.634917	0.577484	0.896311	0.757082
Danio_rerio_newGene_17867	0.230343	0.0673515	0	0.194187	0.121272	0
Danio_rerio_newGene_17868	0.11614	0.119008	0.12355	0.069666	0	0.0890705
Danio_rerio_newGene_17885	4.8326	3.57886	2.3745	2.30774	2.47915	3.587
Danio_rerio_newGene_17893	1.94408	2.15304	1.40518	1.4926	2.15702	2.08551
Danio_rerio_newGene_17898	0.362494	0.527729	0.27018	0.595658	0.597206	0.938814
Danio_rerio_newGene_17902	0.403716	0.417287	0.13242	0.268942	0.543805	0.899611
Danio_rerio_newGene_1792	10.7232	11.3709	11.8595	10.7757	10.5862	10.9779
Danio_rerio_newGene_17929	0.284545	0.138127	0.365959	0.436237	0.166211	0.101541
Danio_rerio_newGene_1794	2.82495	2.75141	1.56017	2.21424	1.69403	1.78346
Danio_rerio_newGene_17952	0.67881	0.310586	0.444894	0.386476	0.675485	0.599782
Danio_rerio_newGene_17955	1.77376	0.957789	1.52716	1.17081	1.39846	1.074
Danio_rerio_newGene_17956	0.282221	0.0521345	0.075897	0.357032	0.401433	0.231857
Danio_rerio_newGene_17957	0.436743	0.2992	0.473276	0.685084	0.756959	0.496538
Danio_rerio_newGene_17958	0.491972	0.708648	0.79685	0.841473	0.530386	0.571381
Danio_rerio_newGene_17959	0.509027	0.582689	1.09567	0.656702	0.815911	0.586944
Danio_rerio_newGene_17989	0.386266	0.892384	0.82235	0.753374	0.860213	0.493241
Danio_rerio_newGene_17996	0.042371	0.0362265	0.100636	0.0537035	0.081202	0
Danio_rerio_newGene_18001	2.04314	2.41909	1.93393	1.69652	1.92913	1.40539
Danio_rerio_newGene_18006	39.0309	36.3022	40.6733	24.8365	20.5808	16.042
Danio_rerio_newGene_18011	0.201993	0.311832	0.556639	0.207189	0.977935	1.16594
Danio_rerio_newGene_18012	0.892292	1.09593	1.29141	2.07102	1.25358	0.987356
Danio_rerio_newGene_18015	11.4089	10.0953	7.61221	6.58312	6.88797	6.34513
Danio_rerio_newGene_18028	0.144431	0.253619	0.117954	0.16516	0.176174	0.0818035
Danio_rerio_newGene_18031	0.076191	0.10623	0	0.039582	0.089097	0.0499495
Danio_rerio_newGene_18037	0	0.256875	0.049592	0.0422595	0.036253	0
Danio_rerio_newGene_18039	0	0	0.062857	0	0.234304	0
Danio_rerio_newGene_1804	0.270529	0.152304	0.260429	0.117704	0.72512	0.347915
Danio_rerio_newGene_18042	3.31371	4.52975	3.84844	4.29479	5.67155	5.93532
Danio_rerio_newGene_18049	0.737695	0.720871	0.802421	0.768354	0.60347	0.426743
Danio_rerio_newGene_18052	1.2228	1.82223	1.64674	1.54233	1.5647	1.14613
Danio_rerio_newGene_18076	0.289431	0.26181	0.184288	0.0209045	0.0599445	0.090762
Danio_rerio_newGene_18093	0.192344	0.221766	0.347834	0.424328	0.396471	0.248585
Danio_rerio_newGene_18096	2.02496	1.1497	1.5555	1.71459	0.761887	0.986568
Danio_rerio_newGene_18115	19.1751	21.401	15.9275	17.2089	20.6036	18.3304
Danio_rerio_newGene_18123	0	0	0.192898	0	0	0.0924435
Danio_rerio_newGene_18138	0.247382	0	0.034061	0	0.0949585	0.0983795
Danio_rerio_newGene_18142	4.36591	7.31991	4.12374	4.13369	5.9548	5.36637
Danio_rerio_newGene_18153	2.37351	2.35907	2.20138	1.84543	2.31086	1.79653
Danio_rerio_newGene_18168	5.27295	5.03612	5.0425	4.97642	6.30666	4.60713
Danio_rerio_newGene_18169	0.131555	0.370593	0.314226	0.527563	0.203912	0.3348
Danio_rerio_newGene_18172	7.16194	8.41598	8.11233	7.26433	7.92715	7.81776
Danio_rerio_newGene_18175	3.38437	4.08319	3.79283	3.53798	5.50271	3.90668
Danio_rerio_newGene_18177	3.95724	5.29476	4.4049	4.80551	5.36248	6.08031
Danio_rerio_newGene_18180	0.168007	0	0.10521	0	0	0
Danio_rerio_newGene_18183	4.87216	6.13976	4.64829	5.68089	5.75994	5.16218
Danio_rerio_newGene_18185	6.41625	4.91703	4.66163	5.87674	6.22368	6.92601
Danio_rerio_newGene_18186	6.4692	6.28031	8.50939	7.07873	6.67467	5.74179
Danio_rerio_newGene_18193	0.173784	0.41889	0.06531	0	0.247242	0.254144
Danio_rerio_newGene_18201	5.37858	2.75301	5.31103	7.26281	6.39216	4.89299
Danio_rerio_newGene_18202	3.07442	3.86127	3.89708	4.89885	5.64879	5.49089
Danio_rerio_newGene_18217	0.961303	0.884331	0.769609	0.452418	0.697846	0.278709
Danio_rerio_newGene_18228	1.23419	2.00131	2.07483	2.05908	1.73364	1.77043
Danio_rerio_newGene_18236	1.45023	0.64394	0.77923	1.3741	1.54453	1.49759
Danio_rerio_newGene_18242	3.27571	4.8545	4.29958	5.52168	5.849	4.29263
Danio_rerio_newGene_18250	6.5812	4.66855	4.69209	5.99794	6.75774	5.0606
Danio_rerio_newGene_18251	0.308796	0.359975	0.319559	0.332126	0.336031	0.334134
Danio_rerio_newGene_18258	0.161836	0.258615	0.239882	0.14551	0.269591	0.138151
Danio_rerio_newGene_1826	0.275599	0.266457	0.494873	0.294285	0.356728	0.101516
Danio_rerio_newGene_18260	0.205872	0.262449	0.034274	0.595349	0.114532	0.20125
Danio_rerio_newGene_18261	0.795161	0.467471	0.407113	0.420605	0.588093	0.634954
Danio_rerio_newGene_18264	3.1281	4.38797	3.31531	3.28757	4.43736	4.39157
Danio_rerio_newGene_18265	1.61861	1.90208	1.75214	1.58696	2.53297	1.59842
Danio_rerio_newGene_18266	0.422644	0.604103	0.299173	0.55339	0.57052	0.72077
Danio_rerio_newGene_18268	441.679	496.666	328.675	396.182	338.956	443.6
Danio_rerio_newGene_18274	0.908964	1.02121	1.08594	0.969373	0.982979	0.889637
Danio_rerio_newGene_18275	1.09328	2.76526	2.92403	3.65614	1.63901	1.52155
Danio_rerio_newGene_18276	0.623962	1.6286	1.02545	1.3367	0.721155	0.537776
Danio_rerio_newGene_18277	3.10271	2.76897	3.01837	2.33314	3.17311	3.97639
Danio_rerio_newGene_18282	4.43468	5.90864	3.73885	5.94135	5.56688	4.26171
Danio_rerio_newGene_18283	0.063371	0	0.0606605	0	0	0.32007
Danio_rerio_newGene_18285	0.358909	0.27405	0.377267	0.092789	0.262576	0.346804
Danio_rerio_newGene_18286	0.070893	0.282571	0.170227	0.169542	0.207035	0.037239
Danio_rerio_newGene_18295	0	0	0	0	0	0
Danio_rerio_newGene_18296	0.32993	0	0	0.347081	0.153177	0
Danio_rerio_newGene_183	0.061278	0	0	0.074271	0.018418	0
Danio_rerio_newGene_18310	6.69895	12.7714	8.18995	7.04192	5.43878	4.93314
Danio_rerio_newGene_18320	0.0936015	0	0.034568	0	0	0
Danio_rerio_newGene_18335	0	0.0968055	0	0	0	0
Danio_rerio_newGene_18342	0.153059	0.274628	0.140412	0.137951	0.397429	0.26234
Danio_rerio_newGene_18345	0.155198	0.262853	0.326208	0.1452	0.105691	0.158582
Danio_rerio_newGene_18349	0.262663	0	0.303856	0	0.449709	0.462546
Danio_rerio_newGene_1835	1.76561	1.66858	1.78746	1.50381	1.36395	1.36523
Danio_rerio_newGene_18350	0	0	0	0.409364	0.332914	1.45414
Danio_rerio_newGene_18375	0.957932	0.766802	1.34836	0.732495	1.4895	0.512466
Danio_rerio_newGene_18383	0.950111	1.07734	0.991884	0.822561	0.832971	0.483844
Danio_rerio_newGene_18385	0.162654	0.0611175	0	0.168328	0	0.02489
Danio_rerio_newGene_18399	0.597016	1.02483	0.611255	0.481666	0.679733	0.669763
Danio_rerio_newGene_184	0.0581455	0	0	0	0.107527	0
Danio_rerio_newGene_18414	0.549503	0.329588	0.471457	0.229388	0.383651	0.596888
Danio_rerio_newGene_18430	0.414124	0.741046	0.505473	0.421617	0.415667	0.677282
Danio_rerio_newGene_18433	4.58918	6.25856	4.58746	5.24047	4.55882	5.18603
Danio_rerio_newGene_18435	4.83008	5.3154	6.20702	5.77005	7.73544	4.83348
Danio_rerio_newGene_18440	1.93864	0.959208	1.46323	1.28499	1.15995	2.4985
Danio_rerio_newGene_18445	1.53634	1.79716	1.44143	1.13177	0.769702	0.407286
Danio_rerio_newGene_18446	2.41952	1.45786	1.68095	1.19022	1.0405	0.59843
Danio_rerio_newGene_18447	0.621709	0.761235	0.796307	0.421179	0.445485	0.560771
Danio_rerio_newGene_18450	0.484901	0.536422	0.517545	0.804705	0.581698	0.614031
Danio_rerio_newGene_18458	0.801683	0.83461	0.827315	0.874329	0.85658	0.505582
Danio_rerio_newGene_18506	21.6657	12.4886	12.1743	8.76816	9.75526	13.8743
Danio_rerio_newGene_18520	0.178964	0.134957	0.181906	0.183532	0.11528	0.0891555
Danio_rerio_newGene_18524	6.40448	5.69393	5.90651	5.66405	6.43277	7.33603
Danio_rerio_newGene_18560	0.361939	0.520215	0.488805	0.339948	0.275089	0.224315
Danio_rerio_newGene_18563	0	0.055087	0.156967	0.16132	0.228297	0
Danio_rerio_newGene_18570	2.57038	2.8157	2.79861	2.09411	1.56442	0.727742
Danio_rerio_newGene_18607	7.69025	11.7674	10.4803	11.1193	8.84944	4.85888
Danio_rerio_newGene_18624	1.02342	1.13375	1.0087	1.03178	1.41518	1.46902
Danio_rerio_newGene_18629	0.434101	0.446335	0.361125	0.185906	0.151435	0.189383
Danio_rerio_newGene_18659	0.0440445	0.016492	0.0865315	0	0.0293885	0
Danio_rerio_newGene_18668	0.33709	0.41752	0.233947	0.208059	0.213585	0.242305
Danio_rerio_newGene_18678	0.292592	0.544246	0.258998	0.335824	0.458993	0.399664
Danio_rerio_newGene_18691	0.0684765	0.292927	0.13011	0.028995	0	0
Danio_rerio_newGene_18697	0.142168	0.515726	0.200205	0.305486	0.396429	0.082293
Danio_rerio_newGene_18698	0.428584	0.419233	0.311879	0.337623	0.305083	0.368482
Danio_rerio_newGene_18700	0.254748	0.19475	0.308219	0.276657	0.241029	0.0976755
Danio_rerio_newGene_18702	7.8391	7.09916	10.4919	10.1309	12.0866	16.6164
Danio_rerio_newGene_18711	5.13294	4.79083	6.20641	5.10731	5.80195	4.80296
Danio_rerio_newGene_18727	0	0.479225	0	0.11138	0.305395	0
Danio_rerio_newGene_18732	0.128449	0.429434	0.146059	0.130596	0.120935	0.081838
Danio_rerio_newGene_1874	0.159553	0.249185	1.3433	0.184414	1.04071	0.63227
Danio_rerio_newGene_18753	0.700859	0.545224	0.611554	0.804311	0.888166	1.58886
Danio_rerio_newGene_18782	0.211902	0.184086	0.26973	0.34055	0.210842	0.0838875
Danio_rerio_newGene_18790	0.301382	0.258516	0.433667	0.416783	0.303715	0.455271
Danio_rerio_newGene_1881	0.334026	0.208962	0.357356	0.2974	0.33362	0.236447
Danio_rerio_newGene_18818	0.057503	0.0411395	0.062609	0	0.118938	0.117675
Danio_rerio_newGene_18838	0.724008	0.841133	1.03713	0.724037	1.04395	0.89407
Danio_rerio_newGene_18839	0.529739	0.94417	0.625213	0.929832	0.808296	0.621517
Danio_rerio_newGene_18847	0.0718835	0	0	0.091312	0.051644	0
Danio_rerio_newGene_18876	0.024847	0.0948865	0	0	0.10471	0.0328055
Danio_rerio_newGene_1888	1.19185	2.93481	1.9492	1.99081	2.64434	1.27603
Danio_rerio_newGene_18896	0.447774	0.292971	0.117022	0.31489	0.189185	0.148959
Danio_rerio_newGene_1891	0.080203	0.029489	0.0748365	0.187535	0.048714	0.246142
Danio_rerio_newGene_18924	0.226596	0.4684	0.230318	0.313087	0.317652	0.320549
Danio_rerio_newGene_18927	0.854555	0.87447	0.666231	1.04484	0.440355	0.195026
Danio_rerio_newGene_18937	0	0.053366	0	0.014294	0.0473425	0.082518
Danio_rerio_newGene_1894	0.488461	0.301598	0.259634	0.426602	0.437834	0.353257
Danio_rerio_newGene_18945	3.03826	3.01677	4.34517	4.35599	7.91064	5.94578
Danio_rerio_newGene_18952	0.983101	1.03996	1.12404	0.99893	0.992883	0.956937
Danio_rerio_newGene_18962	1.04845	0.859272	0.897822	0.592077	0.889419	0.987734
Danio_rerio_newGene_18963	0	0.135978	0.156051	0	0.206322	0
Danio_rerio_newGene_18967	1.21459	2.61463	2.58835	1.27299	1.26286	0.530515
Danio_rerio_newGene_18978	0.566207	0.552853	1.20702	1.1542	1.39214	0.821612
Danio_rerio_newGene_18992	4.60717	6.47507	6.90714	3.96728	6.25331	3.12774
Danio_rerio_newGene_19	0.979205	0.783011	0.546207	0.561543	0.816512	0.558463
Danio_rerio_newGene_19004	8.08612	10.6894	8.97521	13.2589	11.7561	12.5012
Danio_rerio_newGene_19008	0.932367	1.71979	1.55776	1.71417	1.80247	1.34916
Danio_rerio_newGene_1901	0.364158	0.55989	0.679499	1.25842	1.63504	1.16488
Danio_rerio_newGene_19014	0.230789	0.796411	0.430211	0.959754	0.440802	0.503432
Danio_rerio_newGene_19036	5.45448	5.91048	4.82786	6.43889	7.96809	6.50343
Danio_rerio_newGene_19061	4.60279	4.47046	4.36168	4.26551	4.57242	3.42847
Danio_rerio_newGene_19064	8.69469	7.89485	7.35152	8.00343	4.14702	5.14855
Danio_rerio_newGene_19076	0	0	0.139937	0	0	0
Danio_rerio_newGene_19082	1.04307	1.76807	1.73691	1.37418	2.38849	1.65014
Danio_rerio_newGene_19084	0.350866	0.218359	0.078056	0.176331	0.243426	0.168424
Danio_rerio_newGene_19091	1.14276	1.19398	1.07951	0.999901	0.98153	1.03089
Danio_rerio_newGene_19108	0.379783	0.291136	0.124426	0.0717765	0.19187	0.0680715
Danio_rerio_newGene_19121	1.07586	1.58118	0.107936	0.12592	0.695252	0.443187
Danio_rerio_newGene_19125	0.539908	0.862543	0.642485	0.723359	1.05466	0.967542
Danio_rerio_newGene_19159	0.075629	0	0	0	0.0391785	0.080517
Danio_rerio_newGene_19171	0.342145	0.343317	0.150446	0.363465	0.042291	0.295474
Danio_rerio_newGene_19184	5.53063	4.17622	4.44262	4.74577	4.65699	4.11225
Danio_rerio_newGene_19191	0.0734545	0.226138	0.112642	0.048852	0.14289	0.102989
Danio_rerio_newGene_19201	9.116	11.9034	14.3495	16.8619	18.0931	12.7832
Danio_rerio_newGene_19211	1.17408	1.0404	1.07263	0.595479	0.840749	0.436563
Danio_rerio_newGene_19215	0.424317	0.556619	0.749324	0.39516	0.42037	0.8315
Danio_rerio_newGene_19240	1.86824	1.33273	0.897651	1.09214	0.747073	0.630811
Danio_rerio_newGene_19250	0.21712	0.48337	0.203495	0.469923	0.326364	0.0950235
Danio_rerio_newGene_19251	0.354233	0.663413	0.498934	0.732679	0.46168	0.335417
Danio_rerio_newGene_19261	8.22234	8.1114	6.91644	8.10203	9.48786	6.4781
Danio_rerio_newGene_19272	2.35745	2.47095	2.32753	2.51839	2.50095	2.33101
Danio_rerio_newGene_19291	0.14502	0.225008	0.0691645	0.11993	0.0643595	0.162259
Danio_rerio_newGene_193	1.1135	1.30326	1.59043	1.67298	2.06061	1.57346
Danio_rerio_newGene_19302	881.218	873.341	859.486	904.242	937.523	1293.34
Danio_rerio_newGene_19351	1.83438	1.89142	1.76003	1.83291	2.23342	0.863376
Danio_rerio_newGene_19355	2.51862	2.40371	2.40941	2.70502	2.27505	1.94371
Danio_rerio_newGene_1937	0.9063	0.608241	0.702114	1.52374	1.11787	1.10585
Danio_rerio_newGene_19373	0.640527	0.507091	0.282622	0.556847	0.321663	0.48661
Danio_rerio_newGene_1943	0	0	0.0250405	0.090738	0	0.0673765
Danio_rerio_newGene_19456	0.126188	0.135396	0.0332865	0.142425	0	0.0238205
Danio_rerio_newGene_19484	1.73855	2.14782	2.51808	2.4884	2.17194	2.26654
Danio_rerio_newGene_19487	1.50629	1.71378	1.34793	1.69232	1.99446	1.62414
Danio_rerio_newGene_19488	0.366064	0.0443635	0.256194	0	0.153112	0.0500005
Danio_rerio_newGene_1949	2.65738	2.42226	2.54791	1.81953	2.47095	2.69971
Danio_rerio_newGene_19491	0.185627	0.378528	0.671208	0.26411	1.12537	1.49159
Danio_rerio_newGene_1953	0.532521	0.483612	0.503411	0.435029	0.310024	0.310991
Danio_rerio_newGene_19531	0.885819	1.06647	0.690873	0.904985	1.02055	0.966888
Danio_rerio_newGene_19560	2.34278	2.36478	1.76524	1.97216	2.80033	2.1313
Danio_rerio_newGene_19567	1.53123	1.79315	1.45399	1.07299	1.57146	1.25577
Danio_rerio_newGene_19569	0.931329	1.18334	1.32813	1.50083	1.23042	0.848513
Danio_rerio_newGene_19570	5.18263	5.40502	6.19616	6.38977	4.77426	3.89251
Danio_rerio_newGene_19572	0	0	0	0.086959	0.220607	0
Danio_rerio_newGene_19574	0.795798	1.07798	1.00651	1.06686	1.72663	1.17278
Danio_rerio_newGene_19577	4.05813	4.43729	4.71959	5.79288	5.11186	3.62291
Danio_rerio_newGene_19587	3.08539	2.95526	3.23426	2.94451	4.03964	3.63589
Danio_rerio_newGene_19613	0.0818915	0.089881	0.113365	0.0371835	0.307248	0
Danio_rerio_newGene_19619	2.58995	2.72646	2.2586	2.65164	2.7253	1.6066
Danio_rerio_newGene_19624	1.26201	1.01997	1.95615	0.992537	1.64891	1.10409
Danio_rerio_newGene_19631	0.497429	0.565851	0.718788	0.781946	0.727233	0.317759
Danio_rerio_newGene_19640	2.8695	4.19848	2.59002	2.65269	1.83713	1.69272
Danio_rerio_newGene_19641	4.65022	4.33237	4.81179	5.40108	4.977	3.36082
Danio_rerio_newGene_19649	5.3411	12.0673	7.76153	6.6826	3.25263	1.64948
Danio_rerio_newGene_19650	8.59907	15.9902	14.0169	9.84212	4.7941	3.60151
Danio_rerio_newGene_19651	11.7437	21.2338	18.1411	12.1847	5.78654	4.13574
Danio_rerio_newGene_19652	6.2898	12.3318	9.38868	7.54284	3.54516	1.88219
Danio_rerio_newGene_19653	0.479448	0.677212	0.577882	0.358814	0.127456	0.457745
Danio_rerio_newGene_19654	3.37645	5.43635	3.81184	4.97812	4.96275	5.24256
Danio_rerio_newGene_19656	3.28755	2.35165	2.87418	3.50535	2.68856	3.68432
Danio_rerio_newGene_19658	0.288484	0.469129	0	0.252582	0.227743	0.311454
Danio_rerio_newGene_19666	1.26686	1.15058	1.62841	1.23892	1.1391	1.46199
Danio_rerio_newGene_1967	3.75599	3.5693	3.44222	2.62022	3.53928	2.68664
Danio_rerio_newGene_19677	0.496526	0.334493	0.408975	0.289166	0.214869	0.330472
Danio_rerio_newGene_19679	10.9373	9.68543	12.1298	13.2206	17.5297	16.9853
Danio_rerio_newGene_1968	2.2399	3.21284	2.52797	2.46734	2.41865	1.37067
Danio_rerio_newGene_19688	5.28335	4.75637	4.35806	3.28303	4.11396	4.87381
Danio_rerio_newGene_19693	36.2327	43.0016	40.5098	46.2121	54.7641	49.1682
Danio_rerio_newGene_19697	0.622471	0.556278	0.861687	0.81482	0.885438	1.03421
Danio_rerio_newGene_19713	0.576128	0.788977	0.482399	0.29797	0.639612	0.632108
Danio_rerio_newGene_19715	1.65064	1.34416	0.856864	1.79247	2.0262	1.91804
Danio_rerio_newGene_19716	18.8023	17.7076	15.6677	15.5612	17.6137	22.2577
Danio_rerio_newGene_19718	1.75652	4.04083	2.731	3.53769	2.75585	2.56253
Danio_rerio_newGene_1972	9.75424	10.5063	8.91006	9.85821	6.15839	5.71262
Danio_rerio_newGene_19723	1.39087	1.93499	1.61299	1.24936	1.88746	1.56744
Danio_rerio_newGene_19725	9.94426	13.4249	16.8598	16.6369	14.1773	6.81001
Danio_rerio_newGene_19726	2.14603	1.96349	1.91522	1.88391	2.40239	3.40389
Danio_rerio_newGene_19728	6.38496	7.42647	6.28677	7.53564	9.51471	8.58431
Danio_rerio_newGene_19732	8.36725	9.2935	8.92333	8.91325	7.21042	6.03853
Danio_rerio_newGene_19733	2.44151	2.01827	1.92058	2.1755	2.53034	2.17551
Danio_rerio_newGene_19742	2.62806	2.24473	3.0813	2.47804	2.44875	1.56371
Danio_rerio_newGene_19743	2.23128	1.8534	1.7938	2.11291	2.61726	2.06097
Danio_rerio_newGene_19749	4.39158	5.16696	4.2903	5.34171	7.01948	5.89079
Danio_rerio_newGene_19751	0.322032	0.499259	0.659415	0.70458	0.703214	0.640663
Danio_rerio_newGene_19754	0.333881	0.760579	0.269251	0.424884	0.593798	0.712376
Danio_rerio_newGene_19758	13.3342	10.3014	9.40318	10.7601	12.5932	12.9632
Danio_rerio_newGene_19759	1.7413	1.31464	1.69265	1.4446	1.1306	1.77004
Danio_rerio_newGene_19760	1.9441	2.01516	2.26874	1.74617	1.73349	1.41482
Danio_rerio_newGene_19764	0.289257	0.497713	0.263875	0.248151	0.212753	0.304304
Danio_rerio_newGene_19765	0.097866	0.065869	0.365214	0.317414	0.0679415	0.107538
Danio_rerio_newGene_1977	1.71275	1.83065	1.3015	1.34734	0.92759	0.563926
Danio_rerio_newGene_19771	0.49169	1.69299	0.761835	0.697953	1.96664	0.752003
Danio_rerio_newGene_19810	0	0.365107	0.0903485	0	0.204257	0
Danio_rerio_newGene_1982	0.107454	0.159649	0.315215	0.317065	0.254669	0.11734
Danio_rerio_newGene_19823	1.39174	1.16324	1.48251	2.10144	1.98861	2.54886
Danio_rerio_newGene_19825	0.261219	0.223638	0.199127	0.051226	0.142081	0.136148
Danio_rerio_newGene_19826	1.28336	1.18959	1.12136	1.08618	0.939069	1.07405
Danio_rerio_newGene_19833	1.79479	1.1694	0.748246	0.55367	0.756099	0.556178
Danio_rerio_newGene_19846	0.558393	0.33259	0.972308	0.870183	0.666143	0.622222
Danio_rerio_newGene_19864	1.16376	0.70823	1.11997	0.750001	1.13748	1.23505
Danio_rerio_newGene_19865	0.084594	0.533515	0.068344	0.260699	0.0812085	0
Danio_rerio_newGene_19867	1.92793	2.52543	2.87806	2.29872	2.25407	1.82438
Danio_rerio_newGene_19884	1.30217	0.59509	0.545911	1.84759	0.319353	0.699631
Danio_rerio_newGene_19886	0.152708	0.362895	0.119849	0	0.162149	0
Danio_rerio_newGene_19891	0.898701	0.753399	1.23513	0.824094	0.939644	0.944676
Danio_rerio_newGene_19894	0.250887	0.230087	0.32481	0.395916	0.244489	0.0545985
Danio_rerio_newGene_19896	4.89799	6.61393	7.558	4.68599	6.32514	6.67009
Danio_rerio_newGene_19906	0.85272	0.475044	0.564331	0.422576	1.07395	1.14062
Danio_rerio_newGene_19919	0	0.147961	0	0.254148	0.082994	0.07925
Danio_rerio_newGene_1992	0.557819	0.957507	0.796817	1.194	0.870943	0.885413
Danio_rerio_newGene_19923	0.228482	0.298022	0.20462	0.387376	0.153477	0.082443
Danio_rerio_newGene_19947	2.42703	3.87888	3.29816	2.62052	4.0318	3.0683
Danio_rerio_newGene_19954	0.263514	0.296578	0.366335	0.207786	0.107822	0.235505
Danio_rerio_newGene_19955	1.11019	0.986166	0.827322	0.934637	0.957433	0.972946
Danio_rerio_newGene_19979	2.03918	2.27781	2.23675	1.63378	2.03162	1.60974
Danio_rerio_newGene_19980	3.72243	2.40284	2.6145	2.5601	2.06721	2.18452
Danio_rerio_newGene_19986	1.93732	2.16778	1.92067	2.21113	1.86196	1.7775
Danio_rerio_newGene_19988	12.2776	12.1378	9.21926	9.82788	11.7749	9.88943
Danio_rerio_newGene_19997	0.309706	0.316175	0.0570885	0.343317	0.151073	0.241739
Danio_rerio_newGene_20044	0	0.0509015	0.0563725	0.846698	0.428063	0.59762
Danio_rerio_newGene_20058	0.148304	0.315953	0.0914215	0.420424	0.342264	0.333776
Danio_rerio_newGene_20059	0	0	0	0	0	0
Danio_rerio_newGene_20103	0.271587	0.051327	0.231422	0.49585	0	0.154926
Danio_rerio_newGene_20111	0.426557	0.107931	0.180257	0.178735	0.209218	0.0904965
Danio_rerio_newGene_20114	1.41062	1.47504	1.07724	1.35304	1.77236	1.38672
Danio_rerio_newGene_20115	5.09918	4.10223	2.46722	2.96428	2.86602	2.82983
Danio_rerio_newGene_20137	0.423521	0.084484	0	0.226088	0.112948	0.249991
Danio_rerio_newGene_20139	0	0.138569	0	0.192362	0	0.0355655
Danio_rerio_newGene_20140	0.203657	0.275711	0.194914	0.326007	0.217347	0.135636
Danio_rerio_newGene_20143	0.0769705	0.075954	0.084321	0.214359	0.0670845	0.109582
Danio_rerio_newGene_20147	0	0.363737	0.0366555	0.304246	0.233087	0.06904
Danio_rerio_newGene_20152	0.040204	0.115164	0.171416	0.161445	0.130619	0
Danio_rerio_newGene_20155	8.67161	12.5281	9.17465	5.94267	3.64602	6.9235
Danio_rerio_newGene_20156	0.0127635	0.024952	0.059813	0.104128	2.56095	1.21341
Danio_rerio_newGene_2016	1.90689	1.38577	1.42277	1.38286	1.87831	1.40811
Danio_rerio_newGene_20175	0.094939	0.203437	0.205966	0.218901	0.224475	0.373962
Danio_rerio_newGene_20184	0.056511	0	0.064015	0.105853	0.238332	0
Danio_rerio_newGene_20186	0.0620945	0	0.0454615	0	0	0.209954
Danio_rerio_newGene_20187	0.536901	0.926257	0.589528	0.787205	0.471242	0.414446
Danio_rerio_newGene_20190	0.239459	0.0238215	0.624284	0.841821	0.208891	0.0687285
Danio_rerio_newGene_20200	0.923738	0.705743	0.879391	0.748574	0.856447	0.718695
Danio_rerio_newGene_20202	0.628084	1.29689	0.981702	0.586537	0.143445	0.389333
Danio_rerio_newGene_20205	0.307791	1.4838	1.3864	0.191727	1.90456	2.0518
Danio_rerio_newGene_20206	0.229454	0.646366	0.591483	0.289308	0.182735	0.267524
Danio_rerio_newGene_20208	2.6822	3.38012	3.06193	3.2296	3.89514	3.17472
Danio_rerio_newGene_20211	0	0	0.0911965	0.0420475	0	0
Danio_rerio_newGene_20229	0.901447	0.590979	1.4856	0.842912	0	0.923574
Danio_rerio_newGene_20234	0.160351	1.11885	0.75984	0.557797	0.786677	0.725557
Danio_rerio_newGene_20243	0.282456	0.0208545	0.99282	0.493282	0	0.0141075
Danio_rerio_newGene_20252	1.21785	1.3208	1.0449	0.984768	1.42459	1.12397
Danio_rerio_newGene_20253	0.02507	0	0.119276	0	0.033657	0
Danio_rerio_newGene_20254	0.270615	0.779193	0.656197	0.573691	0.498302	0.472041
Danio_rerio_newGene_2028	0.904616	1.38214	0.937134	0.735921	1.29272	1.18237
Danio_rerio_newGene_20281	0.386414	0.13298	0.71542	0.285867	0.536821	0.313947
Danio_rerio_newGene_20312	9.33638	9.09662	8.15714	8.77517	9.76381	6.25715
Danio_rerio_newGene_20313	8.0628	7.15743	7.47092	6.81212	7.37773	5.55281
Danio_rerio_newGene_20316	0.502944	0.957974	1.20279	0.719382	0.75628	0.923017
Danio_rerio_newGene_20330	0.415007	1.2008	0.349911	0.492241	0.4467	0.44371
Danio_rerio_newGene_20331	0	0.07384	0	0.109519	0.0945605	0
Danio_rerio_newGene_20337	0.504381	0.313184	0.53763	0.265139	0.202527	0.264508
Danio_rerio_newGene_20343	0.0369395	0.347381	0.212304	0.204851	0	0
Danio_rerio_newGene_20363	0.141927	0.338984	0.298657	0.239214	0.22955	0.30682
Danio_rerio_newGene_20365	1.23524	1.52693	1.8705	1.46898	1.2273	1.88086
Danio_rerio_newGene_20371	1.72552	0.516889	1.27438	1.10452	0.464119	0.7101
Danio_rerio_newGene_20381	0.956784	0.820663	0.48399	0.446927	0.663234	0.431227
Danio_rerio_newGene_20382	0.063722	0.0681755	0	0	0.28372	0.125021
Danio_rerio_newGene_20393	0.162702	0.170471	0.342473	0.342403	0.209799	0.329291
Danio_rerio_newGene_2040	0	0.080718	0.11705	0	0.203831	0.094273
Danio_rerio_newGene_20416	0.137673	0.085046	0.138828	0.185337	0.259719	0.059546
Danio_rerio_newGene_20430	0.258528	0.428925	0.356816	1.13706	0.737494	0.899818
Danio_rerio_newGene_20441	0.444294	0.542532	0.876563	0.566156	0.993428	0.350139
Danio_rerio_newGene_20446	0.397419	0.453085	0.369656	0.471581	0.35159	0.548284
Danio_rerio_newGene_20451	0.291774	0.571801	0.414133	0.399605	0.330307	0.345796
Danio_rerio_newGene_20458	1.40369	1.57979	1.85203	2.33374	2.3514	1.73156
Danio_rerio_newGene_20462	1.72616	2.17441	3.22028	1.48375	2.18793	1.95751
Danio_rerio_newGene_20477	14.9973	19.309	28.7848	7.69851	12.1736	4.6395
Danio_rerio_newGene_20499	7.4637	9.76752	5.06645	6.80195	9.6082	8.16925
Danio_rerio_newGene_20505	0.476395	0.311689	0.328496	0.472272	0.469803	0.272307
Danio_rerio_newGene_20530	4.17246	4.34203	4.32744	3.71464	3.53804	3.11375
Danio_rerio_newGene_20532	0.158065	0.204535	0.299544	0.013672	0.110626	0.218716
Danio_rerio_newGene_2054	0.039504	1.29686	0.103208	0.083635	0.090212	0
Danio_rerio_newGene_20548	9.13127	8.43139	10.5653	12.0261	10.3617	6.68704
Danio_rerio_newGene_2056	3.2813	3.73456	2.269	2.01364	2.18929	2.18288
Danio_rerio_newGene_20563	0.569264	0.498148	0.44131	0.269147	0.440067	0.175588
Danio_rerio_newGene_20568	0.349733	0.2148	0.624497	0.356552	0.288314	0.141239
Danio_rerio_newGene_20569	0.230415	0	0	0.413057	0	0.127391
Danio_rerio_newGene_2059	0.291688	0.314918	0.322228	0.295365	0.108834	0.107401
Danio_rerio_newGene_20615	2.75399	4.22292	3.05138	1.85027	1.10939	1.74453
Danio_rerio_newGene_20618	1.83887	1.49104	1.97393	1.81581	1.3871	1.51299
Danio_rerio_newGene_20619	5.22662	6.15649	9.58182	8.03193	7.46641	10.5039
Danio_rerio_newGene_2065	0.384089	0.543797	0.206599	0.171795	0.733363	0.32453
Danio_rerio_newGene_20664	9.74982	11.7859	9.25273	8.12955	9.23949	9.50603
Danio_rerio_newGene_20680	2.37548	1.62352	1.4675	1.86473	2.94642	1.0886
Danio_rerio_newGene_2069	1.89131	1.95422	2.12847	1.80227	2.61818	2.17981
Danio_rerio_newGene_20706	0.136694	0.15145	0	0	0	0.288417
Danio_rerio_newGene_20716	0.040729	0	0.136486	0	0	0.144575
Danio_rerio_newGene_2073	0.487086	0.620278	1.04283	0.918705	1.56383	1.45566
Danio_rerio_newGene_20730	1.12152	1.39565	1.80614	1.37871	1.80072	1.80918
Danio_rerio_newGene_20750	1.39101	2.21363	1.29049	1.85976	1.74274	1.83355
Danio_rerio_newGene_20754	1.3916	1.91303	1.77828	2.04268	1.16278	1.62978
Danio_rerio_newGene_20756	0.891063	1.53275	1.64083	2.14975	2.42222	2.3336
Danio_rerio_newGene_20758	2.24361	1.92393	1.30114	1.13743	1.46242	2.32447
Danio_rerio_newGene_2076	0.786064	1.22294	0.96073	1.04689	0.624745	0.623024
Danio_rerio_newGene_20760	0.662068	0.685996	0.40911	0.577959	0.367349	0.744943
Danio_rerio_newGene_20762	1.88213	2.62725	3.29807	3.58812	2.53843	2.54469
Danio_rerio_newGene_20763	0.911679	1.52668	1.03616	1.24069	0.931196	0.992833
Danio_rerio_newGene_20764	7.37138	6.8874	7.47407	8.71906	4.5552	4.99721
Danio_rerio_newGene_20772	2.07531	2.237	2.04057	2.44626	2.88833	2.12789
Danio_rerio_newGene_20773	1.70101	2.10957	2.01563	2.10103	2.31811	1.80878
Danio_rerio_newGene_20774	5.40311	4.88895	5.55845	4.54052	5.14369	4.45115
Danio_rerio_newGene_20775	0.940174	0.555697	2.01303	3.28579	4.08671	2.69578
Danio_rerio_newGene_20786	0.461581	0.408332	0.418987	0.625093	0.677744	0.785323
Danio_rerio_newGene_20787	0.203525	0.167493	0.188628	0.213109	0.11911	0.160527
Danio_rerio_newGene_20790	1.85194	1.32123	1.72842	1.49523	1.84186	0.833654
Danio_rerio_newGene_20794	0.961842	1.27317	0.995972	1.15184	1.74578	1.32825
Danio_rerio_newGene_20799	0.849975	1.14753	0.717386	1.46546	1.9259	2.228
Danio_rerio_newGene_20800	0.46233	0.614569	0.761212	0.888099	0.84933	0.770131
Danio_rerio_newGene_20807	2.44018	2.82442	2.96192	3.07719	3.46788	3.58415
Danio_rerio_newGene_20810	0.432809	0.358295	0.463146	0.343585	0.578225	0.247199
Danio_rerio_newGene_20811	1.37091	2.30964	1.87436	1.37355	1.1038	0.917882
Danio_rerio_newGene_20815	8.06274	8.5561	6.75475	7.39603	7.08542	8.57613
Danio_rerio_newGene_20834	4.85763	5.4833	5.04489	5.46165	7.59225	6.53217
Danio_rerio_newGene_20841	1.66887	1.86654	1.42229	0.520046	0.949253	0.869131
Danio_rerio_newGene_20844	0.418845	0.536318	0.440759	0.458142	0.350509	0.237513
Danio_rerio_newGene_20850	1.00935	1.20694	1.17393	1.1213	0.964069	1.12758
Danio_rerio_newGene_20852	0.359078	0.77039	0.850216	0.630664	0.699326	1.15752
Danio_rerio_newGene_20853	4.10369	4.0697	3.05551	3.16184	5.11749	4.17426
Danio_rerio_newGene_20855	5.53501	5.00931	5.61004	5.17698	6.58845	3.58992
Danio_rerio_newGene_20856	3.97585	3.90485	3.58018	4.52415	6.62906	5.31046
Danio_rerio_newGene_20858	2.87588	2.42592	2.51144	2.79002	3.07875	2.65422
Danio_rerio_newGene_20861	0.602013	0.798514	0.514139	0.698769	0.875471	0.587774
Danio_rerio_newGene_20863	1.88842	3.11094	2.02425	3.05709	3.34459	2.37027
Danio_rerio_newGene_20867	0.367743	0.668964	0.247138	0.204705	0.375787	0.36959
Danio_rerio_newGene_20868	3.0176	2.48418	2.66699	2.30644	3.17388	2.02178
Danio_rerio_newGene_20869	3.60859	4.57491	3.36586	3.79788	5.73241	4.47042
Danio_rerio_newGene_20870	0.918659	1.46746	1.41637	2.97161	1.95618	1.50619
Danio_rerio_newGene_20871	1.56924	2.52778	3.01393	3.18178	2.94791	2.34397
Danio_rerio_newGene_20873	1.34904	1.58489	1.24541	0.995097	1.03025	1.58016
Danio_rerio_newGene_20874	9.96894	9.30165	10.149	9.96482	8.55264	12.6551
Danio_rerio_newGene_20875	8.72315	8.35862	7.87229	9.47539	7.54078	11.8915
Danio_rerio_newGene_20879	0.229429	0.086672	0.113362	0.0432615	0.112004	0.193489
Danio_rerio_newGene_20888	0.259104	0.129393	0.041337	0.171149	0.114467	0.09519
Danio_rerio_newGene_20889	2.1993	2.27314	2.17759	2.53217	3.0789	2.31742
Danio_rerio_newGene_2089	1.089	1.74821	0.954157	1.17234	2.01618	1.39439
Danio_rerio_newGene_20902	1.92567	2.57332	1.27339	1.15005	2.05976	0.790014
Danio_rerio_newGene_20904	0.803736	0.884134	0.833964	0.674441	0.979483	0.722325
Danio_rerio_newGene_2091	2.69489	2.4907	1.69347	2.26968	1.89225	1.90502
Danio_rerio_newGene_20912	3.5492	3.67347	3.04998	3.27828	3.17621	2.8166
Danio_rerio_newGene_20917	0.909374	0.992578	0.929166	0.997548	1.04184	0.88391
Danio_rerio_newGene_2092	1.75132	2.48677	1.83022	0.877327	2.52479	0.648358
Danio_rerio_newGene_20924	1.7133	1.86832	1.92628	2.33514	2.17354	2.50975
Danio_rerio_newGene_20927	2.21329	2.37242	2.05901	2.39233	2.88364	2.05062
Danio_rerio_newGene_20932	0.071261	0.332252	0.148169	0.168762	0.347797	0.192124
Danio_rerio_newGene_20950	0.0870735	0.034013	0	0.288172	0	0.191437
Danio_rerio_newGene_20955	3.13472	3.36424	3.06059	3.6224	4.93612	3.82382
Danio_rerio_newGene_20959	0.262586	0.156489	0.155433	0.203608	0.090826	0.129096
Danio_rerio_newGene_20977	2.41616	2.30583	2.46933	2.26466	1.82176	1.59728
Danio_rerio_newGene_20979	2.16637	2.55623	1.40005	2.20933	2.49375	1.6117
Danio_rerio_newGene_20981	0.187102	0.277202	0.176921	0.175718	0.280313	0.0998825
Danio_rerio_newGene_20983	0.456338	0.353578	0.0811065	0.482594	0.295697	0.171317
Danio_rerio_newGene_210	0.097638	0.156589	0	0	0.145724	0.074471
Danio_rerio_newGene_21005	0.605248	0	0	0.256182	1.46391	1.28916
Danio_rerio_newGene_21011	3.10201	5.28511	3.19578	5.50502	7.4809	5.51755
Danio_rerio_newGene_21025	0.19491	0.223822	0.232861	0.104937	0.177534	0.368806
Danio_rerio_newGene_2103	0.402661	0.586912	0.736461	0.371099	0.596546	0.385933
Danio_rerio_newGene_21033	0.066756	0.341747	0.34945	0.0925055	0.33942	0.227344
Danio_rerio_newGene_21045	1.21471	1.33868	1.12211	0.868286	1.0781	1.04303
Danio_rerio_newGene_21053	0.514543	0.609805	0.502042	0.391201	0.721732	0.496047
Danio_rerio_newGene_21054	0.0640675	0.0518545	0	0	0.176097	0.167852
Danio_rerio_newGene_21055	13.9002	17.8404	19.7934	15.4208	20.4656	16.308
Danio_rerio_newGene_21071	6.23559	6.13241	6.55729	6.4759	7.95381	6.34023
Danio_rerio_newGene_21073	0.372213	0.21917	0.267293	0.378792	0.177037	0.279394
Danio_rerio_newGene_21098	0.297547	0.419064	0.330699	0.33166	0.429901	0.154677
Danio_rerio_newGene_21127	0.810356	0.779601	0.709782	0.727645	0.736294	0.277487
Danio_rerio_newGene_21149	0.273946	0.036883	0.337093	0.084678	0.574935	0.143088
Danio_rerio_newGene_21162	0.711429	0.946886	0.754791	0.835179	1.0975	0.488062
Danio_rerio_newGene_21182	0.196549	0.188841	0.126591	0.399274	0.18469	0.260249
Danio_rerio_newGene_21201	0.0905045	0.0842075	0.186447	0.23572	0.104187	0.128827
Danio_rerio_newGene_21202	0	0.124862	0.0147105	0.431061	0.130759	0.153168
Danio_rerio_newGene_21224	4.21988	6.64353	5.18927	6.38288	4.97124	5.56101
Danio_rerio_newGene_21232	0.118602	0	0.0334795	0	0.0516875	0.0283225
Danio_rerio_newGene_21233	0.748573	0.952673	0.632699	0.534712	0.821862	0.588283
Danio_rerio_newGene_21234	2.76608	2.71081	2.86719	2.49278	2.75108	2.96198
Danio_rerio_newGene_21249	0.264503	0.425573	0.267364	0.604392	0.355058	0.667407
Danio_rerio_newGene_21273	0.84095	1.27755	1.4846	1.8406	1.46697	1.48453
Danio_rerio_newGene_2128	6.0211	5.76971	5.36522	5.28865	4.50459	5.48805
Danio_rerio_newGene_21284	2.41451	2.80913	2.55978	2.59621	3.21601	2.86887
Danio_rerio_newGene_2130	0.657438	0.413599	0.317259	0.313964	0.379458	0.514545
Danio_rerio_newGene_21326	0.976444	0.989748	0.946813	1.08082	1.02057	0.823641
Danio_rerio_newGene_21343	0	0	0	0	0	0
Danio_rerio_newGene_21350	0.292876	0.397877	0	0	0.044777	0
Danio_rerio_newGene_2136	1.12353	1.30714	1.10974	1.11838	1.53391	1.00083
Danio_rerio_newGene_21378	0.344919	0.337479	0.363804	0.196154	0.184527	0
Danio_rerio_newGene_21386	0.0767625	0.237598	0	0.229382	0	0.050071
Danio_rerio_newGene_21387	0.282224	0.235786	0.188547	0.299299	0.091821	0.157195
Danio_rerio_newGene_21391	0.215109	0.197072	0.235585	0.254786	0.087349	0.0917215
Danio_rerio_newGene_21398	0.427195	0.247535	0.468718	0.450072	0.326371	0.451111
Danio_rerio_newGene_21408	0.346604	0.323446	0.26044	0.33909	0.53464	0.512963
Danio_rerio_newGene_21419	0.869728	0.304634	0.33936	0.906628	0.486667	0.526929
Danio_rerio_newGene_21423	1.26055	1.28276	1.37899	1.09549	0.948052	0.790886
Danio_rerio_newGene_21435	0.2572	0.312045	0.271354	0.192715	0.209248	0.13172
Danio_rerio_newGene_21444	0.830349	1.47411	1.7748	1.39661	1.70216	1.47735
Danio_rerio_newGene_21450	0.453803	0.499628	0.450914	0.541443	0.517192	0.493882
Danio_rerio_newGene_21461	0.709928	0.538933	0.556725	0.719817	0.527544	0.346686
Danio_rerio_newGene_21477	0.113853	0.190416	0.205225	0.0717645	0.108981	0.188355
Danio_rerio_newGene_21491	0.660589	0.061767	0.171152	0.155502	0.181441	0.134206
Danio_rerio_newGene_21504	0.173576	0.104152	0.127766	0.124202	0	0.0815785
Danio_rerio_newGene_21524	12.3056	12.8724	14.1278	10.1193	11.481	10.1009
Danio_rerio_newGene_21540	1.63541	2.17897	1.96511	2.44971	2.81189	2.00974
Danio_rerio_newGene_21542	0.950325	0.944872	1.53128	1.7405	1.9739	1.75587
Danio_rerio_newGene_2155	0.25036	0.31238	0.324369	0.227732	0.184203	0
Danio_rerio_newGene_21560	0.675613	0.992622	1.98399	1.59892	1.3124	1.02849
Danio_rerio_newGene_2157	1.34517	2.2806	1.93551	0.623901	1.27886	0.859409
Danio_rerio_newGene_21581	0.227721	0	0	0.169942	0.209982	0
Danio_rerio_newGene_21586	1.0896	1.13887	1.15737	1.29523	1.66715	1.74133
Danio_rerio_newGene_21592	1.48616	1.55114	1.09596	1.27134	1.25879	1.81201
Danio_rerio_newGene_21606	0.171852	0.074529	0	0	0.044836	0
Danio_rerio_newGene_21660	1.83092	2.23371	2.03139	2.12967	2.7671	2.25568
Danio_rerio_newGene_21670	0.568716	0.57102	0.81609	0.705823	0.656983	1.02198
Danio_rerio_newGene_21672	1.52576	1.45941	1.16167	1.54693	1.59902	0.936049
Danio_rerio_newGene_21692	0.560494	0.814418	0.542955	0.828854	1.13467	0.960862
Danio_rerio_newGene_21697	5.07222	6.11322	4.15759	4.33551	4.89802	3.95325
Danio_rerio_newGene_21699	0.316271	0.170369	0.681435	0.234862	0.201548	0.185094
Danio_rerio_newGene_21708	4.05949	4.30682	3.97817	3.96572	3.8924	3.57749
Danio_rerio_newGene_21713	1.9663	2.53143	2.11743	2.42506	2.14581	1.99426
Danio_rerio_newGene_21714	2.42481	2.85343	2.46663	2.3185	2.57009	2.22497
Danio_rerio_newGene_2172	3.51978	4.54764	3.2304	4.80619	4.01169	2.81351
Danio_rerio_newGene_21748	3.06766	2.64057	2.06065	1.62346	1.91705	1.56163
Danio_rerio_newGene_21763	0.636243	1.03042	0.947012	1.08208	1.75069	1.53455
Danio_rerio_newGene_2177	1.49262	1.7387	1.31678	1.27067	1.41634	1.39515
Danio_rerio_newGene_21780	2.10879	2.86668	2.17879	2.69438	5.67999	2.60857
Danio_rerio_newGene_2179	2.43978	2.6472	2.40401	1.73038	2.68176	1.70112
Danio_rerio_newGene_21806	3.14349	5.60807	3.04698	4.08982	4.56399	2.93418
Danio_rerio_newGene_2181	12.6698	12.5845	9.80636	12.745	16.7718	12.45
Danio_rerio_newGene_21813	1.69711	1.48601	0.868038	1.15652	1.1094	0.8053
Danio_rerio_newGene_21815	20.2779	21.9557	20.2098	14.0988	10.1829	7.96968
Danio_rerio_newGene_21817	0.323398	0.887034	0.861404	0.819549	0.874844	0.63498
Danio_rerio_newGene_21819	0.345576	0.615512	0.212701	0.177746	0.539359	0.133454
Danio_rerio_newGene_21820	0.678822	0.775034	0.641511	0.446572	0.739703	0.779454
Danio_rerio_newGene_21821	0.228506	0.297356	0.260715	0.3687	0.295942	0.246964
Danio_rerio_newGene_21825	0	0	0.059609	0	0.099128	0.119091
Danio_rerio_newGene_21826	0.173236	0.138462	0.170226	0.218539	0.304138	0.256624
Danio_rerio_newGene_21828	0	0.066743	0.0191135	0	0.0250505	0
Danio_rerio_newGene_21829	0.792612	1.07936	0.848432	0.858465	1.17495	0.697616
Danio_rerio_newGene_21845	1.94897	2.33335	2.25822	2.30503	1.94122	1.99728
Danio_rerio_newGene_21846	0.185988	0.171947	0.148942	0.254168	0.447411	0.298402
Danio_rerio_newGene_21847	0.0629565	0	0	0.221948	0.122836	0.052043
Danio_rerio_newGene_21850	0.52154	0.572933	0.532829	0.363156	0.410567	0.356885
Danio_rerio_newGene_21853	19.6179	21.3512	19.4299	11.4904	7.97967	8.52975
Danio_rerio_newGene_21856	8.45209	7.81049	12.0451	13.0387	16.6643	23.5251
Danio_rerio_newGene_21857	8.76093	11.9595	14.6983	17.596	20.4409	27.7948
Danio_rerio_newGene_21858	0.48607	0.117613	0.156929	0.229139	0.12229	0.242784
Danio_rerio_newGene_21864	0.177113	0.149099	0.194456	0.07	0.200165	0.0269015
Danio_rerio_newGene_21882	0.161773	0.216012	0.214018	0.158714	0.117869	0.0422175
Danio_rerio_newGene_21897	1.23646	1.3264	2.27279	1.78846	1.36581	1.55673
Danio_rerio_newGene_21898	0	0.313383	0	0	0	0.180261
Danio_rerio_newGene_21899	0.173934	0.429829	0.188851	0	0	0
Danio_rerio_newGene_21904	1.40098	1.82222	1.60402	2.02169	1.80077	1.75074
Danio_rerio_newGene_21907	0.459196	0.566339	0.352699	0.29122	0.547368	0.16135
Danio_rerio_newGene_21918	0.156593	0.345327	0.321539	0.120584	0.247333	0.092461
Danio_rerio_newGene_21929	0.249197	0.315571	0.392493	0.533708	0.345728	0.465018
Danio_rerio_newGene_21932	0.760903	0.142331	0.596073	0.460253	0.323022	0.347681
Danio_rerio_newGene_21946	0	0.139822	0.074927	0.0340585	0.075478	0.303032
Danio_rerio_newGene_21950	0.0394715	0.0629625	0.0942355	0.24215	0.077581	0.034651
Danio_rerio_newGene_21952	0.387203	0.445781	0.545254	0.380694	0.496783	0.292824
Danio_rerio_newGene_21962	0.545746	0.41201	0.570704	0.385477	0.227377	0.444221
Danio_rerio_newGene_2197	0	0.222105	0.319496	0.250764	0.214271	0.201422
Danio_rerio_newGene_21977	0.376502	0.77872	0.654191	0.887522	0.76987	0.919497
Danio_rerio_newGene_21979	0.263664	0.831008	0.272664	0.848608	0.847427	0.743839
Danio_rerio_newGene_21986	17.4063	23.4219	17.351	16.2695	14.0669	12.5977
Danio_rerio_newGene_22012	0	0.234939	0.0971065	0.171588	0.033889	0.0712565
Danio_rerio_newGene_22017	0.483815	0.409458	0.402269	0.618947	0.47327	0.30155
Danio_rerio_newGene_22019	0.435674	0.813241	0.76868	0.383653	0.3419	0.586287
Danio_rerio_newGene_2202	27.3332	25.7363	30.9497	34.8996	39.0041	37.5255
Danio_rerio_newGene_22023	0.869956	1.88617	1.91327	2.34558	2.93549	3.14265
Danio_rerio_newGene_22044	0.473104	0.606822	0.452977	0.210043	0.184907	0.268645
Danio_rerio_newGene_2206	2.442	3.0556	2.75345	3.03866	1.83339	2.31563
Danio_rerio_newGene_2208	5.13522	4.0216	3.31993	4.71512	5.89299	3.96837
Danio_rerio_newGene_2210	8.4455	9.94229	11.0071	12.1169	15.4161	13.2331
Danio_rerio_newGene_22102	3.95152	3.6079	4.6376	4.54406	3.53158	3.53834
Danio_rerio_newGene_22111	0.881293	0.95517	0.713075	0.728879	1.1253	1.26178
Danio_rerio_newGene_22118	0.070601	0.357413	0.311392	0.268663	0.199504	0.134786
Danio_rerio_newGene_22130	0.223754	0.187968	0.080287	0	0.018649	0.0370215
Danio_rerio_newGene_22134	0.0257295	0.0416275	0	0.143761	0.140973	0.042523
Danio_rerio_newGene_22138	0.881048	0.193871	0.291141	0.881891	0.386526	0.351731
Danio_rerio_newGene_22146	0.109546	0	0.184433	0.0585475	0.0976775	0.068507
Danio_rerio_newGene_2215	1.84782	1.80497	1.18615	1.52992	2.27058	1.19091
Danio_rerio_newGene_2216	5.9205	6.58988	8.02085	7.90958	6.56394	5.83933
Danio_rerio_newGene_22160	0.388953	0.168305	0.151529	0.302511	0.380667	0.0514845
Danio_rerio_newGene_2217	6.02715	6.30458	6.34476	6.6865	6.03446	5.71976
Danio_rerio_newGene_22173	8.25942	8.58783	6.92469	5.85051	6.78403	6.62101
Danio_rerio_newGene_22177	0.0395675	0.399583	0.133474	0.0586075	0.160728	0.048377
Danio_rerio_newGene_22178	11.703	11.0712	10.9442	11.1219	12.4566	10.8213
Danio_rerio_newGene_2218	3.6306	6.34718	6.21595	6.78697	9.28804	6.96265
Danio_rerio_newGene_22180	0	0	0.115862	0	0	0.053616
Danio_rerio_newGene_22182	0.555739	0.372233	0.627348	0.317633	0.564115	0.584854
Danio_rerio_newGene_22196	4.11496	8.92902	3.73903	2.53592	4.97288	3.30271
Danio_rerio_newGene_22199	0.817631	1.68884	1.77092	1.4677	0.865552	0.700018
Danio_rerio_newGene_222	1.10452	2.05192	2.00853	1.70814	2.30718	2.26007
Danio_rerio_newGene_2220	2.31143	1.80591	2.22899	2.14726	2.33874	1.87921
Danio_rerio_newGene_22208	1.17184	1.12706	0.901331	1.07453	1.12818	0.803363
Danio_rerio_newGene_22211	2.25814	2.48087	2.87445	3.60579	3.20302	2.56942
Danio_rerio_newGene_22212	0	0.079886	0	0.0569905	0.0818745	0.0288585
Danio_rerio_newGene_22214	18.2154	20.7206	12.4599	18.8002	17.1985	12.3083
Danio_rerio_newGene_22219	6.52443	8.09972	7.57037	9.83689	10.0134	5.98506
Danio_rerio_newGene_2222	2.2033	2.20224	2.18367	2.67777	2.98373	1.30401
Danio_rerio_newGene_22228	7.86967	9.14382	8.12835	8.38251	10.056	9.63677
Danio_rerio_newGene_22229	0.292409	0.652004	0.497139	1.2292	0.715251	0.38919
Danio_rerio_newGene_2223	4.21087	3.68054	3.952	3.90202	4.55511	3.25539
Danio_rerio_newGene_22230	1.64999	2.65727	1.60873	2.5687	2.4674	3.19271
Danio_rerio_newGene_22231	1.73294	2.13646	2.08738	2.44873	3.79677	2.10678
Danio_rerio_newGene_22233	0.845204	0.712446	0.607623	1.13343	1.36636	0.994439
Danio_rerio_newGene_22235	5.61648	8.22049	6.93321	7.50966	11.3146	8.35061
Danio_rerio_newGene_22241	0.042684	0.099474	0	0	0	0.018702
Danio_rerio_newGene_22246	1.92548	2.88766	2.38042	2.07337	3.11932	2.40169
Danio_rerio_newGene_22248	0.501719	0.771269	0	0.280385	0.218353	0
Danio_rerio_newGene_22251	0.942778	0.7453	0.880284	0.772018	0.851521	0.883232
Danio_rerio_newGene_22258	1.67207	3.14058	2.29403	2.96084	3.11512	3.1401
Danio_rerio_newGene_22259	0.836565	1.10966	1.52331	1.73537	3.37245	2.94136
Danio_rerio_newGene_2228	3.78557	4.9471	2.27884	2.56558	2.41659	4.02338
Danio_rerio_newGene_22282	0.456114	0.444574	0.46871	0.415237	0.535444	0.460893
Danio_rerio_newGene_22284	1.11818	1.52581	1.32804	1.31079	1.59388	0.942578
Danio_rerio_newGene_22296	2.80396	2.6176	2.48877	2.32429	2.85066	2.85751
Danio_rerio_newGene_223	4.09455	3.46074	3.45881	3.41667	4.4822	3.33741
Danio_rerio_newGene_22304	0.5073	0.426876	0.694734	0.28327	0.327499	0.659658
Danio_rerio_newGene_22305	2.22121	2.1558	2.34314	2.65765	3.19881	4.04193
Danio_rerio_newGene_22307	7.43721	5.34997	4.66043	6.86067	6.53548	6.90373
Danio_rerio_newGene_22310	3.10856	2.38768	2.7637	2.23331	2.12349	1.48571
Danio_rerio_newGene_22311	0.449705	0.559167	0.536414	0.643236	0.783878	1.00179
Danio_rerio_newGene_22320	1.627	2.17345	1.80074	1.52216	2.05016	2.09042
Danio_rerio_newGene_22322	0.953155	0.747424	0.685155	0.671379	0.858275	1.47664
Danio_rerio_newGene_22323	14.1188	17.3311	25.5056	27.4426	38.7542	53.018
Danio_rerio_newGene_22326	0	0.59671	0	0	0	0
Danio_rerio_newGene_22327	0	0.367808	0.164267	0.0336945	0.129416	0.0655075
Danio_rerio_newGene_22332	1.97664	0.64393	0.370081	0.050176	0.122374	0.0492865
Danio_rerio_newGene_22335	0.30916	0.542095	0.162669	0.283139	0.252304	0.324453
Danio_rerio_newGene_22347	1.80882	1.13356	1.21629	1.30606	0.81299	0.65288
Danio_rerio_newGene_22349	0.857394	1.16191	1.07497	1.60349	1.96286	0.655516
Danio_rerio_newGene_22350	0.0256805	0.031932	0.0614455	0.117159	0.111476	0.074087
Danio_rerio_newGene_22352	1.72814	1.57671	1.45075	2.36323	2.20119	1.42587
Danio_rerio_newGene_22353	2.68041	2.811	1.94766	2.4688	2.53921	2.42666
Danio_rerio_newGene_22364	1.51958	1.72196	1.14682	1.84824	1.98683	1.92457
Danio_rerio_newGene_22365	0.906424	0.59863	0.328536	0.628582	0.779155	0.502395
Danio_rerio_newGene_22368	0.706816	0.870894	1.08928	0.762599	0.881806	0.735549
Danio_rerio_newGene_22369	9.90225	11.8555	11.942	14.5202	14.7349	11.7607
Danio_rerio_newGene_22370	3.36582	4.4232	3.80724	5.29429	4.82282	3.99002
Danio_rerio_newGene_22371	4.88296	3.55387	2.57727	3.22432	3.07029	3.20431
Danio_rerio_newGene_22372	2.17603	1.80977	1.41703	1.575	2.37313	1.61916
Danio_rerio_newGene_22377	1.78264	2.4541	1.83182	2.19525	4.25719	1.9134
Danio_rerio_newGene_22378	6.41946	6.8214	4.9896	5.52043	8.37195	5.39863
Danio_rerio_newGene_22379	1.71472	0.937436	1.7406	1.43298	1.33284	1.32363
Danio_rerio_newGene_22380	0.519961	0.178002	0.182786	0	0.508942	0.032632
Danio_rerio_newGene_22381	0.072898	0	0	0	0.0541805	0
Danio_rerio_newGene_22390	6.28524	6.244	6.06424	6.79625	5.65353	4.7741
Danio_rerio_newGene_22398	1.28817	0.983621	1.02226	0.804161	1.05612	0.852246
Danio_rerio_newGene_22408	1.77153	2.06949	2.04846	1.93506	1.99633	1.74266
Danio_rerio_newGene_22411	2.41123	2.65951	1.0768	1.6139	2.07929	2.05266
Danio_rerio_newGene_22414	1.19495	1.77508	1.31993	1.83105	2.12387	1.82641
Danio_rerio_newGene_22417	2.16024	2.88806	2.38333	3.88027	3.65135	3.28169
Danio_rerio_newGene_22418	163.77	222.288	156.528	125.858	172.143	280.221
Danio_rerio_newGene_22426	4.32197	4.20081	3.12633	3.67853	3.94144	4.49535
Danio_rerio_newGene_22427	4.72416	4.773	4.61876	4.50039	5.92414	7.64492
Danio_rerio_newGene_22428	3.91153	4.27306	5.3771	5.69831	4.9331	6.45757
Danio_rerio_newGene_22430	5.40465	5.67318	6.48264	7.04028	6.88083	9.36477
Danio_rerio_newGene_22431	0.592882	1.35336	1.06175	0.71367	1.09768	1.71257
Danio_rerio_newGene_22432	2.06846	1.45524	1.03768	1.20296	1.51655	1.86505
Danio_rerio_newGene_22435	0	0.124003	0	0.165461	0	0.299138
Danio_rerio_newGene_22447	0.606112	1.2061	0.728849	0.67781	1.00322	0.112727
Danio_rerio_newGene_22452	0.223881	0.204839	0.241429	0.0692575	0.032792	0.0321145
Danio_rerio_newGene_22455	2.34664	3.5646	2.7731	2.73312	1.63939	1.71798
Danio_rerio_newGene_22458	3.48106	5.2497	4.29358	3.72762	3.89266	2.81069
Danio_rerio_newGene_22466	7.10415	6.79924	9.83729	9.49148	9.63241	8.44967
Danio_rerio_newGene_22473	1.15225	1.16259	1.11914	1.07506	1.12107	1.17847
Danio_rerio_newGene_22474	0	0	0	0.0327145	0	0
Danio_rerio_newGene_22476	0	0.474753	0.0418495	0	0.142561	0
Danio_rerio_newGene_22477	0.241792	0.293858	0.234399	0.281871	0.388625	0.232345
Danio_rerio_newGene_22479	0.160972	0.109509	0.117979	0	0.26935	0.146934
Danio_rerio_newGene_22481	1.94981	1.12285	1.43477	1.43272	2.44362	1.29715
Danio_rerio_newGene_22482	0.8328	0.995121	1.06928	0.712679	1.12362	0.683268
Danio_rerio_newGene_22486	4.2543	3.72406	4.26687	4.44644	4.16167	4.67104
Danio_rerio_newGene_22487	25.4346	28.2619	22.8346	20.9235	24.6794	29.8438
Danio_rerio_newGene_22502	0.322226	0	0.182824	0	0.170667	0
Danio_rerio_newGene_22510	0.254465	0.119016	0.246466	0.176032	0.235518	0.0666675
Danio_rerio_newGene_22512	4.44432	4.52708	4.46583	4.25461	5.89392	4.82691
Danio_rerio_newGene_22517	15.5281	19.9	22.0502	20.2528	24.3115	31.8023
Danio_rerio_newGene_22520	1.58965	2.12347	1.57035	1.56197	1.86083	1.85816
Danio_rerio_newGene_22521	0.734125	0.950236	0.865357	0.809389	1.08843	0.886964
Danio_rerio_newGene_22525	0.501519	0.590669	0.807011	0.729432	0.807257	0.208757
Danio_rerio_newGene_22526	0.465112	0.49087	0.340491	0.597832	0.585017	0
Danio_rerio_newGene_22528	1.32456	2.09892	2.03122	1.67983	3.31754	0.736437
Danio_rerio_newGene_22531	0.988602	1.08926	0.754397	0.372941	1.49086	1.45237
Danio_rerio_newGene_22534	8.10173	8.38186	8.2164	9.72059	8.8288	6.54767
Danio_rerio_newGene_2254	2.75879	2.02665	1.79159	1.38211	1.63458	1.72011
Danio_rerio_newGene_22540	1.25889	0.964074	0.904202	1.49689	0.792506	0.909524
Danio_rerio_newGene_22543	1.70256	1.40535	1.03558	1.12269	1.22319	0.767003
Danio_rerio_newGene_22545	4.35377	3.89019	4.52947	4.55351	5.61432	4.40875
Danio_rerio_newGene_22548	2.32144	2.92342	2.67648	3.61938	3.39891	1.95406
Danio_rerio_newGene_22553	0.880469	1.168	0.758525	0.830809	0.891553	0.851581
Danio_rerio_newGene_22574	1.30562	1.42281	1.44805	1.03661	1.25062	1.28715
Danio_rerio_newGene_22582	2.23467	2.07429	1.98745	2.47054	2.34983	1.55567
Danio_rerio_newGene_22583	0.367677	0.091122	0.259748	0.507038	1.08846	0.835967
Danio_rerio_newGene_22587	0.0431455	0.686839	0.266639	0.332584	0.410417	0.433294
Danio_rerio_newGene_22588	2.21714	2.18119	2.78027	2.57117	2.84249	1.71999
Danio_rerio_newGene_22590	0	0.250395	0	0	0.357161	0
Danio_rerio_newGene_22592	0.903845	1.51045	1.59092	1.28188	1.12919	1.01899
Danio_rerio_newGene_22596	1.27777	1.55798	1.46549	1.43592	1.87777	1.35117
Danio_rerio_newGene_22602	0.647669	0.985702	0.395417	0.635854	0.303361	0.238226
Danio_rerio_newGene_22603	0.335559	0.954859	0.545596	0.910191	0.364327	0.786023
Danio_rerio_newGene_22611	0	0.053547	0.0290695	0	0	0.035892
Danio_rerio_newGene_22614	2.87114	3.61683	3.73363	2.77664	3.28466	2.2943
Danio_rerio_newGene_22618	8.24797	7.45207	6.54519	5.10151	5.7592	2.30685
Danio_rerio_newGene_2262	0	0.290195	0	0	0	0
Danio_rerio_newGene_22620	0.232958	0.330272	0.317127	0	0.649205	0.350423
Danio_rerio_newGene_22621	2.30174	3.13957	2.51512	3.64576	2.5362	1.57415
Danio_rerio_newGene_22623	4.10137	4.67579	3.79456	4.78397	5.3576	4.43851
Danio_rerio_newGene_22626	0.164627	0.505341	0.0751725	0.261406	0.050794	0.028887
Danio_rerio_newGene_22634	4.09033	7.28237	4.23283	2.73663	2.33859	3.37448
Danio_rerio_newGene_22635	0.319078	0.371217	0.305983	1.35169	0.903666	1.09409
Danio_rerio_newGene_22636	0.321964	0.724909	0.407566	0.70799	0.656782	0.485533
Danio_rerio_newGene_22638	0.08287	0.438902	0.433891	0.238472	0.447213	0.210507
Danio_rerio_newGene_22653	0.143067	0.109724	0.506425	0	0.133074	0.166591
Danio_rerio_newGene_22654	0.124352	0.114463	0.189543	0.115221	0.224521	0.168956
Danio_rerio_newGene_22657	0.0811305	0.167397	0.022579	0.132238	0.0831885	0.0581795
Danio_rerio_newGene_22667	0.741622	0.749275	0.85996	1.03053	0.97234	0.663543
Danio_rerio_newGene_22670	47.2099	62.875	60.0641	67.5148	59.5934	72.9734
Danio_rerio_newGene_22673	3.17368	3.3007	3.54528	3.98324	5.17819	5.67937
Danio_rerio_newGene_22674	3.14624	4.63345	4.17614	5.29756	5.65368	7.45041
Danio_rerio_newGene_22675	2.34187	2.13521	3.10273	3.62884	3.32244	5.27373
Danio_rerio_newGene_22676	6.71592	6.43954	7.79655	5.87198	7.27572	6.73856
Danio_rerio_newGene_22684	0.800835	0.86717	1.02022	0.585444	0.437964	0.908885
Danio_rerio_newGene_22687	0.682488	0.914712	0.679638	0.576744	0.605656	0.42642
Danio_rerio_newGene_22690	0.604471	0.18811	0.567616	0.148496	0.654189	0.228839
Danio_rerio_newGene_22712	1.91837	2.0537	1.76343	1.73739	1.04786	1.07443
Danio_rerio_newGene_22714	1.65489	1.64512	1.26791	1.231	1.81025	1.54238
Danio_rerio_newGene_22715	0.872765	1.08143	0.96219	0.770111	0.715027	0.33022
Danio_rerio_newGene_22724	0.537559	1.04978	0.631972	0.586518	0.427833	0.376794
Danio_rerio_newGene_2273	0.350108	0.337777	0.304459	0.366289	0.672976	0.397401
Danio_rerio_newGene_22730	0.997782	1.16111	0.989508	0.773865	1.17805	1.81059
Danio_rerio_newGene_22732	0.0522995	0.375274	0.383441	0.287674	0.036672	0.309508
Danio_rerio_newGene_22743	2.12374	1.41685	0.5581	3.22567	3.31694	2.2766
Danio_rerio_newGene_22744	1.13222	0.871004	0.838677	1.33479	1.41896	1.17966
Danio_rerio_newGene_22748	1.39285	0.995421	0.888362	1.42565	0.364692	1.87273
Danio_rerio_newGene_22754	10.5362	11.8737	9.80808	11.7071	12.1485	8.54659
Danio_rerio_newGene_22755	1.55003	1.94683	1.64935	2.32844	1.75376	1.38759
[truncated: 1,448 more rows]

## Sheet: Supplementary Table S3
Zebrafish larval lncRNAs identified from the unannotated transcripts, their expression profiles and known identifiers from Gene Bank and Ensembl.
LncRNA identified with ZFLNC BLAST	LncRNA identified with CPAT	All lncRNAs	Gene Bank, and Ensembl IDs	Gene Bank, and Ensembl IDs		WTDD120_FPKM	WTDD124_FPKM	WTDD128_FPKM	WTDD132_FPKM	WTDD136_FPKM	WTDD140_FPKM			WTLL120_FPKM	WTLL124_FPKM	WTLL128_FPKM	WTLL132_FPKM	WTLL136_FPKM	WTLL140_FPKM
Danio_rerio_newGene_10	Danio_rerio_newGene_1	Danio_rerio_newGene_10	Danio_rerio_newGene_10			2.48674	2.49986	2.22889	1.87652	1.35507	1.63939			2.98948	2.64221	2.55523	1.91953	1.83126	1.89348
Danio_rerio_newGene_10003	Danio_rerio_newGene_10173	Danio_rerio_newGene_10003	Danio_rerio_newGene_10003	ENSDART00000138507		1.15583	1.10496	0.949069	0.951678	0.661596	0.6801			1.07959	0.894212	0.581032	0.478868	0.371841	0.206713
Danio_rerio_newGene_10014	Danio_rerio_newGene_10462	Danio_rerio_newGene_10014	Danio_rerio_newGene_10014	ENSDART00000145854		0.398448	0.044021	0.928121	0.0935965	0.852502	0.398937			0	0.457437	0.296615	0.34216	0.205541	0.0669845
Danio_rerio_newGene_10015	Danio_rerio_newGene_10703	Danio_rerio_newGene_10015	Danio_rerio_newGene_10015	ENSDART00000145854		0.322929	0.592046	0.30543	0.7072	0.57299	0.592685			0.35187	0.814523	0.566998	1.06253	0.642544	0.511778
Danio_rerio_newGene_10018	Danio_rerio_newGene_10792	Danio_rerio_newGene_10018	Danio_rerio_newGene_10018	XR_659742.1		0.436253	0.98373	0.301295	0.861851	0.166827	0.363229			0.922092	0.28133	0.698886	0.995561	0.744293	0.873492
Danio_rerio_newGene_10024	Danio_rerio_newGene_10821	Danio_rerio_newGene_10024	Danio_rerio_newGene_10024	XR_663353.1		0.072134	0.392513	0.035713	0.457619	0	0.105042			0.678443	0.754728	0.353923	0.085167	0.222404	0.618874
Danio_rerio_newGene_10030	Danio_rerio_newGene_10934	Danio_rerio_newGene_10030	Danio_rerio_newGene_10030	ENSDART00000140355		2.81315	2.83365	2.09946	1.82489	2.29075	2.68628			1.98349	1.37604	1.0407	1.09264	1.3983	0.799422
Danio_rerio_newGene_1004	Danio_rerio_newGene_1102	Danio_rerio_newGene_1004	Danio_rerio_newGene_1004	XR_660359.1		0.0304755	0.091516	0	0.0286935	0.0676895	0			0.0388935	0.134654	0.0610755	0.12313	0.155987	0
Danio_rerio_newGene_10040	Danio_rerio_newGene_11146	Danio_rerio_newGene_10040	Danio_rerio_newGene_10040	XR_660786.1		6.88963	6.72965	8.01388	5.12855	4.47275	7.86491			3.11201	3.4622	2.53981	2.798	2.95789	1.64744
Danio_rerio_newGene_10044	Danio_rerio_newGene_11233	Danio_rerio_newGene_10044	Danio_rerio_newGene_10044	XR_659497.1		0.128592	0	0.390687	0.38874	0	0.164673			0.16589	0.0509485	0.598097	0.381112	0.329072	0.625429
Danio_rerio_newGene_10046	Danio_rerio_newGene_11260	Danio_rerio_newGene_10046	Danio_rerio_newGene_10046	XR_659496.1		1.2861	0.972185	1.65735	1.27695	0.528987	0.811014			1.23984	1.01061	1.0864	0.780697	1.00377	0.821999
Danio_rerio_newGene_10050	Danio_rerio_newGene_11317	Danio_rerio_newGene_10050	Danio_rerio_newGene_10050	XR_663174.1		1.73483	2.18347	1.90129	1.75391	2.67995	2.69698			1.46086	1.37371	1.9905	1.97868	1.92935	1.47398
Danio_rerio_newGene_10056	Danio_rerio_newGene_11590	Danio_rerio_newGene_10056	Danio_rerio_newGene_10056	vrkk9		1.2454	1.21961	0.506019	1.53307	1.06883	1.03467			1.14218	1.25048	1.1469	1.48699	0.718476	0.417331
Danio_rerio_newGene_10058	Danio_rerio_newGene_11715	Danio_rerio_newGene_10058	Danio_rerio_newGene_10058	ENSDART00000145854		0.10666	0.424107	0.465151	0.33425	0.111331	0.278073			0.196958	0.276055	0.152745	0.0402225	0.032976	0.48606
Danio_rerio_newGene_10065	Danio_rerio_newGene_11765	Danio_rerio_newGene_10065	Danio_rerio_newGene_10065	ENSDART00000140235		8.12043	3.64523	6.63897	6.61992	6.13203	6.7141			5.67455	7.54981	5.16889	4.49793	6.71192	6.23909
Danio_rerio_newGene_10066	Danio_rerio_newGene_11783	Danio_rerio_newGene_10066	Danio_rerio_newGene_10066	ENSDART00000136899		0	0.213461	0.106563	0	0.154815	0.0648345			0	0.0155335	0.243428	0.117193	0	0
Danio_rerio_newGene_10067	Danio_rerio_newGene_11785	Danio_rerio_newGene_10067	Danio_rerio_newGene_10067	NONDRET006529		2.39133	2.48183	2.23139	2.48743	2.42796	2.28071			3.00192	2.50436	2.30289	2.54707	2.33553	2.64322
Danio_rerio_newGene_10070	Danio_rerio_newGene_11803	Danio_rerio_newGene_10070	Danio_rerio_newGene_10070			0	0.267246	0.349443	0.174021	0.386539	0.167321			0	0.162375	0	0.213727	0.024881	0.228455
Danio_rerio_newGene_10071	Danio_rerio_newGene_11973	Danio_rerio_newGene_10071	Danio_rerio_newGene_10071	XR_223148.2		0.133996	0.017884	0.102678	0.145272	0.198875	0.064192			0.324507	0.0438395	0.138064	0.090489	0.110339	0.0219625
Danio_rerio_newGene_10074	Danio_rerio_newGene_12016	Danio_rerio_newGene_10074	Danio_rerio_newGene_10074	XR_660359.1		1.79577	0.859986	1.59389	0.984419	0.720465	0.751905			1.33698	1.18215	1.72771	1.18117	1.30895	0.756667
Danio_rerio_newGene_10075	Danio_rerio_newGene_1215	Danio_rerio_newGene_10075	Danio_rerio_newGene_10075	ENSDART00000153997		0.202913	0.054998	0.028635	0.18566	0	0.0493835			0.228135	0.059569	0.297797	0.0321995	0	0.228977
Danio_rerio_newGene_10081	Danio_rerio_newGene_12259	Danio_rerio_newGene_10081	Danio_rerio_newGene_10081	ENSDART00000129985		0.920171	0.726016	0.817199	0.612152	0.506918	0.739558			0.438228	0.748702	0.677825	0.506896	0.445431	0.437441
Danio_rerio_newGene_10082	Danio_rerio_newGene_12420	Danio_rerio_newGene_10082	Danio_rerio_newGene_10082	XR_225015.2		1.40456	1.83377	1.40787	1.44943	1.45422	1.54459			1.95893	1.79964	1.64886	1.27555	1.41626	1.29364
Danio_rerio_newGene_10084	Danio_rerio_newGene_12421	Danio_rerio_newGene_10084	Danio_rerio_newGene_10084	XR_661157.1		1.61314	2.09207	1.32032	1.86361	1.4277	2.1929			1.76889	1.84768	1.83623	1.82894	1.40362	1.41232
Danio_rerio_newGene_10086	Danio_rerio_newGene_12642	Danio_rerio_newGene_10086	Danio_rerio_newGene_10086	XR_223009.2		0.116165	0.231914	0.0597035	0.0723915	0	0.136298			0.134346	0.20528	0.101948	0.178122	0	0
Danio_rerio_newGene_10100	Danio_rerio_newGene_12657	Danio_rerio_newGene_10100	Danio_rerio_newGene_10100			4.0984	3.27289	5.64239	6.06505	4.83698	5.1889			4.01228	4.74359	4.59608	5.33431	6.54366	5.18647
Danio_rerio_newGene_10102	Danio_rerio_newGene_12659	Danio_rerio_newGene_10102	Danio_rerio_newGene_10102			0.34421	0.148565	0.184066	0.236222	0.153164	0.076332			0.184113	0.290403	0.132398	0.588431	0.256644	0.177117
Danio_rerio_newGene_10104	Danio_rerio_newGene_12715	Danio_rerio_newGene_10104	Danio_rerio_newGene_10104			0.089868	0	0.022062	0	0.0151925	0.0533215			0	0.041972	0	0	0.041706	0
Danio_rerio_newGene_10105	Danio_rerio_newGene_12902	Danio_rerio_newGene_10105	Danio_rerio_newGene_10105	ENSDART00000150088		0.519138	0.790889	0.454353	0.277745	0.635419	0.420156			0.48899	1.05546	0.420937	0.2152	0.09778	0.257644
Danio_rerio_newGene_10106	Danio_rerio_newGene_12999	Danio_rerio_newGene_10106	Danio_rerio_newGene_10106	ENSDART00000148845		0.397602	0.403724	0.0902035	0.462883	0.492418	0.292678			0.363723	0.357733	0.264679	0.516054	0.394776	0.488884
Danio_rerio_newGene_10108	Danio_rerio_newGene_13068	Danio_rerio_newGene_10108	Danio_rerio_newGene_10108	ENSDART00000148963		0.271545	0.501293	0.017055	0.398477	0.207628	0.436181			0.595577	0.484976	0.386033	0.169162	0.294976	0.406702
Danio_rerio_newGene_10120	Danio_rerio_newGene_13129	Danio_rerio_newGene_10120	Danio_rerio_newGene_10120			1.09886	1.66253	1.50564	1.8055	1.73186	2.22853			1.15051	1.77415	1.65693	2.06964	1.88693	1.41566
Danio_rerio_newGene_10135	Danio_rerio_newGene_13202	Danio_rerio_newGene_10135	Danio_rerio_newGene_10135	XR_662186.1		0.377111	0.528745	0	0.604598	0.26731	0.251045			0.227879	1.1171	0.943389	0.333069	0	0.221874
Danio_rerio_newGene_10140	Danio_rerio_newGene_13539	Danio_rerio_newGene_10140	Danio_rerio_newGene_10140	XR_662186.1		0.169158	0.367158	0.299824	0.34274	0.901899	0.218531			0.392585	0.188871	0	0.35195	0	0
Danio_rerio_newGene_10146	Danio_rerio_newGene_13642	Danio_rerio_newGene_10146	Danio_rerio_newGene_10146	XR_661943.1		27.7266	36.4516	32.4585	34.7399	36.9868	35.4682			28.2483	31.4209	25.7942	29.8914	37.1183	25.5145
Danio_rerio_newGene_10162	Danio_rerio_newGene_13706	Danio_rerio_newGene_10162	Danio_rerio_newGene_10162	ENSDART00000146603		1.38428	1.4127	1.25444	1.47167	1.48508	2.19933			0.754675	1.25591	0.999308	0.957506	1.97252	1.4816
Danio_rerio_newGene_10170	Danio_rerio_newGene_14146	Danio_rerio_newGene_10170	Danio_rerio_newGene_10170	ENSDART00000140235		1.82685	1.32205	1.69135	1.43847	1.29072	1.4813			1.95402	1.57294	1.21567	1.26904	1.10957	0.93812
Danio_rerio_newGene_10188	Danio_rerio_newGene_14299	Danio_rerio_newGene_10188	Danio_rerio_newGene_10188	ENSDART00000137727		0.194417	0.236926	0.046132	0.164341	0.153986	0.436151			0.442001	0.111971	0.210778	0.1213	0.231916	0.176855
Danio_rerio_newGene_10189	Danio_rerio_newGene_14406	Danio_rerio_newGene_10189	Danio_rerio_newGene_10189	XR_222888.2		1.23952	0.860014	0.521321	0.892727	0.876993	0.883336			1.75126	1.58954	0.884524	0.81035	0.690921	1.22116
Danio_rerio_newGene_10197	Danio_rerio_newGene_14552	Danio_rerio_newGene_10197	Danio_rerio_newGene_10197	ENSDART00000131801		1.74192	2.59615	1.44923	2.04831	2.52003	2.62042			1.49162	1.87811	1.94387	2.05685	2.58497	2.25641
Danio_rerio_newGene_10198	Danio_rerio_newGene_14636	Danio_rerio_newGene_10198	Danio_rerio_newGene_10198	ENSDART00000153997		0.309112	0.222571	0.0448055	0.317132	0.173089	0.270594			0.208584	0.185053	0.116975	0.155063	0.219333	0.124089
Danio_rerio_newGene_10221	Danio_rerio_newGene_14983	Danio_rerio_newGene_10221	Danio_rerio_newGene_10221	XR_659567.1		0	0	0.042496	0	0.0452635	0.167095			0	0	0	0.371058	0	0.0419945
Danio_rerio_newGene_10241	Danio_rerio_newGene_15269	Danio_rerio_newGene_10241	Danio_rerio_newGene_10241	XR_660498.1		2.79772	3.97086	2.8387	3.14335	3.78877	3.8397			2.78856	2.95437	2.50271	2.86079	3.60904	2.97408
Danio_rerio_newGene_10246	Danio_rerio_newGene_15404	Danio_rerio_newGene_10246	Danio_rerio_newGene_10246	ENSDART00000141535		5.05487	8.57727	4.8541	5.80974	6.29488	7.47835			6.14267	6.51399	4.86428	5.24634	5.98226	5.31496
Danio_rerio_newGene_10274	Danio_rerio_newGene_15434	Danio_rerio_newGene_10274	Danio_rerio_newGene_10274	XR_662748.1		0.281687	0.267474	0.0721865	0.041501	0.0789165	0.267613			0.127188	0.145489	0.110942	0.16772	0.118182	0
Danio_rerio_newGene_10318	Danio_rerio_newGene_15506	Danio_rerio_newGene_10318	Danio_rerio_newGene_10318	ENSDART00000150442		1.9749	2.5915	1.80865	2.32971	2.25559	2.68414			1.90556	2.06807	2.02372	1.94677	2.85082	2.34385
Danio_rerio_newGene_10332	Danio_rerio_newGene_15508	Danio_rerio_newGene_10332	Danio_rerio_newGene_10332	ENSDART00000157033		0.86852	0.995834	0.69263	0.792097	0.704211	0.650057			0.937332	0.853879	1.19236	0.869425	0.740577	0.895751
Danio_rerio_newGene_10337	Danio_rerio_newGene_15527	Danio_rerio_newGene_10337	Danio_rerio_newGene_10337	lnc_ap3d1		7.18167	9.41487	8.99336	8.49974	9.36397	10.6586			7.6519	8.85693	8.32287	8.38923	10.5126	10.835
Danio_rerio_newGene_10350	Danio_rerio_newGene_15624	Danio_rerio_newGene_10350	Danio_rerio_newGene_10350	NONDRET006668		0.53213	0.373123	0.44464	0.553865	0.447124	0.765752			0.555329	0.670486	0.708197	0.692144	0.572814	0.389078
Danio_rerio_newGene_10352	Danio_rerio_newGene_15657	Danio_rerio_newGene_10352	Danio_rerio_newGene_10352			0.307088	0.876319	0.352338	0.635605	0.590462	0.910124			0.955226	0.760333	0.637849	0.750552	0.899137	0.454846
Danio_rerio_newGene_10372	Danio_rerio_newGene_15661	Danio_rerio_newGene_10372	Danio_rerio_newGene_10372	NONDRET001186		0.552229	0.454826	0.298814	0.411347	0.291887	0.561295			0.47367	0.542507	0.571875	0.782863	0.839627	0.632062
Danio_rerio_newGene_10394	Danio_rerio_newGene_15709	Danio_rerio_newGene_10394	Danio_rerio_newGene_10394	ENSDART00000141773		0.138732	0.329574	0.189239	0.13982	0.073627	0.112242			0.100723	0.270811	0.0637355	0.641398	0.127244	0.27214
Danio_rerio_newGene_10405	Danio_rerio_newGene_15739	Danio_rerio_newGene_10405	Danio_rerio_newGene_10405	XR_222983.2		0.331554	0.145494	0.226005	0.116549	0.21495	0.135862			0.238831	0.192231	0.537349	0.219165	0.257674	0.155735
Danio_rerio_newGene_10406	Danio_rerio_newGene_16104	Danio_rerio_newGene_10406	Danio_rerio_newGene_10406	ENSDART00000152652		0.786382	0.521355	0.369135	0.523568	0.448966	0.403151			0.677589	0.669324	0.698174	0.402489	0.589657	0.714496
Danio_rerio_newGene_10413	Danio_rerio_newGene_16115	Danio_rerio_newGene_10413	Danio_rerio_newGene_10413	ENSDART00000140497		0	0.279618	0	0.346542	0	0.246646			0.339126	0	0.174862	0.207827	0.220049	0
Danio_rerio_newGene_10449	Danio_rerio_newGene_16133	Danio_rerio_newGene_10449	Danio_rerio_newGene_10449	ENSDART00000145854		1.47087	1.84452	1.52651	1.07969	1.08269	1.22461			0.793085	1.36724	1.24556	1.07646	0.693135	0.539179
Danio_rerio_newGene_10450	Danio_rerio_newGene_16404	Danio_rerio_newGene_10450	Danio_rerio_newGene_10450	ENSDART00000153644		12.8069	12.4846	9.13738	8.15443	6.48599	4.91656			11.6187	13.9511	10.2032	7.34545	5.12481	2.62008
Danio_rerio_newGene_10457	Danio_rerio_newGene_1658	Danio_rerio_newGene_10457	Danio_rerio_newGene_10457	ENSDART00000141262		0.177661	0.275539	0.366243	0.230685	0.220431	0.207147			0.197827	0.226847	0.328714	0.134747	0.501663	0.10415
Danio_rerio_newGene_10459	Danio_rerio_newGene_16938	Danio_rerio_newGene_10459	Danio_rerio_newGene_10459	ENSDART00000155099		1.70105	2.09764	0.985047	1.10607	1.88647	1.73324			0.754741	1.03706	0.615025	1.14996	1.25149	1.51535
Danio_rerio_newGene_10463	Danio_rerio_newGene_17520	Danio_rerio_newGene_10463	Danio_rerio_newGene_10463	ENSDART00000144974		0.056382	0.0435135	0.0163905	0	0.379554	0.190024			0.046738	0.148359	0.038383	0	0.0771265	0.0992955
Danio_rerio_newGene_10475	Danio_rerio_newGene_18006	Danio_rerio_newGene_10475	Danio_rerio_newGene_10475	XR_223148.2		0.836536	0.650324	0.752292	0.303974	0.508431	0.643278			0.894618	0.731102	0.754571	0.43593	0.47472	0.412465
Danio_rerio_newGene_10506	Danio_rerio_newGene_18201	Danio_rerio_newGene_10506	Danio_rerio_newGene_10506			0.683141	0.838943	0.5321	0.760408	1.47455	0.849317			0.456175	0.86519	1.1099	1.0948	0.928289	0.920272
Danio_rerio_newGene_10513	Danio_rerio_newGene_18283	Danio_rerio_newGene_10513	Danio_rerio_newGene_10513	ENSDART00000133520		0.3445	0.274002	0	0.381111	0.289791	0.091161			0	0.0577035	0	0.271428	0	0.340689
Danio_rerio_newGene_10517	Danio_rerio_newGene_183	Danio_rerio_newGene_10517	Danio_rerio_newGene_10517	ENSDART00000153233		15.7372	0.907183	12.1013	6.16095	2.03355	3.13623			8.63909	4.64909	7.57091	10.7103	1.77113	8.74588
Danio_rerio_newGene_10536	Danio_rerio_newGene_18847	Danio_rerio_newGene_10536	Danio_rerio_newGene_10536	XR_663020.1		0.200547	0	0.0627765	0.110414	0	0.170946			0.120897	0	0.12228	0	0.208022	0.561943
Danio_rerio_newGene_10537	Danio_rerio_newGene_18992	Danio_rerio_newGene_10537	Danio_rerio_newGene_10537	ENSDART00000131770		0.058822	0.993923	0.12993	0.262213	1.04281	1.26151			0.611648	0.227412	0.038693	0.386598	0.413204	0.169501
Danio_rerio_newGene_10541	Danio_rerio_newGene_1982	Danio_rerio_newGene_10541	Danio_rerio_newGene_10541	XR_659748.1		0.133347	0.291687	0.041012	0.093622	0.335145	0.267213			0.312744	0.452198	0.451155	0.101333	0.28866	0.0150545
Danio_rerio_newGene_10553	Danio_rerio_newGene_20059	Danio_rerio_newGene_10553	Danio_rerio_newGene_10553			2.49703	2.64108	2.35013	2.53705	3.26606	2.80277			2.555	2.52626	2.84486	2.78053	2.78387	2.07511
Danio_rerio_newGene_10559	Danio_rerio_newGene_20462	Danio_rerio_newGene_10559	Danio_rerio_newGene_10559			21.2195	20.637	20.2178	19.983	20.2919	21.329			20.8247	22.255	21.3362	21.0267	19.8277	27.9545
Danio_rerio_newGene_10570	Danio_rerio_newGene_20477	Danio_rerio_newGene_10570	Danio_rerio_newGene_10570	XR_659641.1		0.146258	0.336033	0.359322	0.317299	0.169352	0.513311			0.258641	0.461657	0.285442	0.380851	0.496619	0.192876
Danio_rerio_newGene_10574	Danio_rerio_newGene_20716	Danio_rerio_newGene_10574	Danio_rerio_newGene_10574	ENSDART00000153997		0.0956925	0.377405	0.087595	0.203834	0	0.517605			0.047949	0.145563	0.185353	0.317196	0.358353	0.276439
Danio_rerio_newGene_10589	Danio_rerio_newGene_20852	Danio_rerio_newGene_10589	Danio_rerio_newGene_10589	XR_660825.1		0.642616	0.472782	0.823955	0.509861	0.422813	0.316958			0.53474	0.461339	0.488075	0.451096	0.466452	0.408809
Danio_rerio_newGene_10590	Danio_rerio_newGene_20856	Danio_rerio_newGene_10590	Danio_rerio_newGene_10590	ENSDART00000149065		1.98351	2.32504	2.34082	2.2007	2.63819	2.46673			1.34638	1.92233	2.05047	2.29537	1.91185	0.922354
Danio_rerio_newGene_106	Danio_rerio_newGene_20861	Danio_rerio_newGene_106	Danio_rerio_newGene_106	ENSDART00000157159		3.64727	2.69532	1.9462	2.24905	2.9111	2.31212			2.8872	2.95233	2.19615	1.813	2.44843	2.14872
Danio_rerio_newGene_10618	Danio_rerio_newGene_20875	Danio_rerio_newGene_10618	Danio_rerio_newGene_10618			0.154217	0.213241	0.13243	0.258277	0.172498	0.246587			0.145547	0.206998	0.332143	0.170416	0.1159	0.196704
Danio_rerio_newGene_10622	Danio_rerio_newGene_21127	Danio_rerio_newGene_10622	Danio_rerio_newGene_10622	XR_224929.2		0.392949	0.224269	0.434983	0.35975	0.260917	0.404813			0.369034	0.666239	0.27215	0.343601	0.70991	0.412737
Danio_rerio_newGene_10681	Danio_rerio_newGene_21847	Danio_rerio_newGene_10681	Danio_rerio_newGene_10681			5.19112	6.13736	5.05086	4.78878	5.84233	6.40284			4.14973	4.5123	5.364	4.57704	6.6879	2.25499
Danio_rerio_newGene_10685	Danio_rerio_newGene_2197	Danio_rerio_newGene_10685	Danio_rerio_newGene_10685			1.79002	1.94506	2.0924	2.09753	2.3131	1.51614			1.64518	1.74985	1.82787	1.59924	1.58382	0.589784
Danio_rerio_newGene_10686	Danio_rerio_newGene_2215	Danio_rerio_newGene_10686	Danio_rerio_newGene_10686			1.0393	1.69813	0.604856	1.37244	1.40171	1.6034			0.62703	0.71061	0.731164	0.697164	1.27758	1.2502
Danio_rerio_newGene_10688	Danio_rerio_newGene_2216	Danio_rerio_newGene_10688	Danio_rerio_newGene_10688	XR_225233.2		0.465441	0.26374	0.314239	0.315319	0.218086	0.209633			0.246115	0.320673	0.2473	0.348111	0.439349	0.138424
Danio_rerio_newGene_10697	Danio_rerio_newGene_22160	Danio_rerio_newGene_10697	Danio_rerio_newGene_10697	XR_661943.1		0.0388615	0	0	0	0.0377225	0			0.380665	0.0564675	0.028303	0.173447	0	0.288413
Danio_rerio_newGene_107	Danio_rerio_newGene_22248	Danio_rerio_newGene_107	Danio_rerio_newGene_107	XR_659721.1		7.64895	7.07986	5.25041	4.03461	4.42463	5.10895			6.12941	4.96687	4.13724	4.1064	3.63227	2.41536
Danio_rerio_newGene_10711	Danio_rerio_newGene_22304	Danio_rerio_newGene_10711	Danio_rerio_newGene_10711	XR_662409.1		5.76776	6.39715	5.9973	7.29373	7.38112	7.32698			4.81976	5.38332	4.47378	5.32938	6.43125	4.10928
Danio_rerio_newGene_10718	Danio_rerio_newGene_22305	Danio_rerio_newGene_10718	Danio_rerio_newGene_10718	XR_660262.1		6.35535	6.56811	5.90241	5.40775	6.95263	7.56285			5.3811	6.29341	5.3911	5.3193	6.30261	7.04379
Danio_rerio_newGene_10722	Danio_rerio_newGene_22335	Danio_rerio_newGene_10722	Danio_rerio_newGene_10722	XR_663248.1		0.105347	0.0554355	0.348372	0	0.087581	0.166169			0.0562555	0	0	0.140426	0	0.115083
Danio_rerio_newGene_10731	Danio_rerio_newGene_22350	Danio_rerio_newGene_10731	Danio_rerio_newGene_10731			0.840247	0.917271	0.809287	0.816266	0.651977	0.640351			0.961752	0.902074	1.37517	0.747734	0.939272	0.830267
Danio_rerio_newGene_10732	Danio_rerio_newGene_22372	Danio_rerio_newGene_10732	Danio_rerio_newGene_10732	ENSDART00000149567		2.64661	3.60172	3.81138	4.35748	3.99124	3.95208			2.72289	3.59124	4.65148	4.25717	4.83156	4.78785
Danio_rerio_newGene_10741	Danio_rerio_newGene_22418	Danio_rerio_newGene_10741	Danio_rerio_newGene_10741			1.92515	1.34282	1.2317	1.50202	1.0073	0.546746			1.52328	1.73495	1.29701	1.451	1.01256	1.27265
Danio_rerio_newGene_10743	Danio_rerio_newGene_22426	Danio_rerio_newGene_10743	Danio_rerio_newGene_10743			0.741816	0.75971	0.66618	0.941646	0.798488	0.915266			0.551303	0.553164	0.952956	0.86519	1.07598	0.784699
Danio_rerio_newGene_10746	Danio_rerio_newGene_22479	Danio_rerio_newGene_10746	Danio_rerio_newGene_10746	ENSDART00000134984		3.27554	3.56874	2.2141	2.92884	2.43755	4.26757			2.93816	4.55104	3.09873	2.11824	2.44304	2.04768
Danio_rerio_newGene_10760	Danio_rerio_newGene_22487	Danio_rerio_newGene_10760	Danio_rerio_newGene_10760	ENSDART00000149567		6.47326	8.19848	7.09072	7.58831	9.91206	8.77456			5.74011	7.15543	7.79258	7.85598	10.206	8.9467
Danio_rerio_newGene_10769	Danio_rerio_newGene_22548	Danio_rerio_newGene_10769	Danio_rerio_newGene_10769	ENSDART00000151967		0.453585	0.370414	0.250472	0.31605	0.584406	0.374683			0.329697	0.47078	0.460247	0.524269	0.509641	0.38512
Danio_rerio_newGene_10771	Danio_rerio_newGene_22653	Danio_rerio_newGene_10771	Danio_rerio_newGene_10771	ENSDART00000152821		1.22262	0.840315	1.24665	1.95405	1.05436	0.820971			1.60852	2.23873	1.87672	1.14579	1.91483	1.55773
Danio_rerio_newGene_10773	Danio_rerio_newGene_22755	Danio_rerio_newGene_10773	Danio_rerio_newGene_10773	psmd1pa2		3.15623	3.41324	3.37305	3.81944	2.78082	3.42927			3.70256	3.25741	3.98254	3.00708	3.81343	3.10137
Danio_rerio_newGene_10774	Danio_rerio_newGene_22846	Danio_rerio_newGene_10774	Danio_rerio_newGene_10774	NONDRET002175		6.53912	5.23296	5.384	5.33971	5.22066	4.94233			5.55209	4.30038	5.66198	4.99728	4.93795	5.51103
Danio_rerio_newGene_10778	Danio_rerio_newGene_22896	Danio_rerio_newGene_10778	Danio_rerio_newGene_10778			0.582553	0.57689	0.868894	0.54426	0.740773	0.9043			0.528419	0.894303	0.647365	0.604871	0.898404	0.577245
Danio_rerio_newGene_10781	Danio_rerio_newGene_22902	Danio_rerio_newGene_10781	Danio_rerio_newGene_10781	XR_659657.1		8.00781	6.91314	6.81949	7.64906	7.25385	7.63684			7.89393	8.57411	6.44514	7.49669	7.89827	6.76869
Danio_rerio_newGene_10786	Danio_rerio_newGene_22912	Danio_rerio_newGene_10786	Danio_rerio_newGene_10786			0.434261	0.38363	0.754323	0.661271	0.290772	0.605262			0.450187	0.219602	0.416773	0.259063	0.479403	0.409532
Danio_rerio_newGene_10788	Danio_rerio_newGene_22915	Danio_rerio_newGene_10788	Danio_rerio_newGene_10788			1.34723	2.16421	2.35993	2.91834	2.3068	3.0838			1.56222	1.98454	2.44018	2.38561	2.99275	3.53915
Danio_rerio_newGene_10789	Danio_rerio_newGene_22934	Danio_rerio_newGene_10789	Danio_rerio_newGene_10789	ENSDART00000149567		7.63833	10.5588	10.5589	14.7324	17.7614	14.1536			8.66801	8.5049	11.3764	12.7005	16.6469	9.20946
Danio_rerio_newGene_10791	Danio_rerio_newGene_23078	Danio_rerio_newGene_10791	Danio_rerio_newGene_10791	XR_660262.1		1.71772	1.71921	1.58306	2.26729	1.62365	1.25115			1.58983	2.09475	2.21974	1.37716	1.70721	1.3474
Danio_rerio_newGene_10802	Danio_rerio_newGene_23427	Danio_rerio_newGene_10802	Danio_rerio_newGene_10802	ENSDART00000132404		4.13208	4.83235	4.38423	4.76879	4.74722	5.44681			6.35273	4.02478	4.62658	4.42976	5.14908	4.4548
Danio_rerio_newGene_10811	Danio_rerio_newGene_23454	Danio_rerio_newGene_10811	Danio_rerio_newGene_10811			1.18522	1.14159	1.99648	0.791969	1.04915	1.49845			1.72855	1.13747	1.36241	2.21425	1.71476	1.88608
Danio_rerio_newGene_10813	Danio_rerio_newGene_23455	Danio_rerio_newGene_10813	Danio_rerio_newGene_10813			2.71887	2.64063	3.44382	2.85496	3.24467	3.63084			3.08392	2.43347	2.68637	2.62841	3.54878	4.87875
Danio_rerio_newGene_10816	Danio_rerio_newGene_23470	Danio_rerio_newGene_10816	Danio_rerio_newGene_10816			4.82772	5.775	4.85719	5.38694	6.06397	6.40051			4.13392	5.44305	5.16216	5.21033	6.20255	3.74414
Danio_rerio_newGene_10825	Danio_rerio_newGene_23683	Danio_rerio_newGene_10825	Danio_rerio_newGene_10825	ENSDART00000155830		3.88677	4.1777	3.90569	3.96989	3.64735	3.0296			4.0012	4.41595	2.57141	4.1905	4.89467	4.2383
Danio_rerio_newGene_10827	Danio_rerio_newGene_2369	Danio_rerio_newGene_10827	Danio_rerio_newGene_10827			0.842491	1.08182	0.559626	1.12298	1.21496	1.07582			0.475861	1.11172	0.805515	0.897377	1.13801	1.15262
Danio_rerio_newGene_10829	Danio_rerio_newGene_23837	Danio_rerio_newGene_10829	Danio_rerio_newGene_10829	lnc_rnf185		1.28178	1.46432	2.18918	2.55378	1.78452	2.06459			1.13525	1.5005	2.30899	1.90193	1.63046	1.50445
Danio_rerio_newGene_10834	Danio_rerio_newGene_23925	Danio_rerio_newGene_10834	Danio_rerio_newGene_10834			0.782552	0.646617	0.7933	0.691133	0.571918	0.569474			0.924863	0.809931	0.816963	0.989571	0.701088	0.548009
Danio_rerio_newGene_10835	Danio_rerio_newGene_24069	Danio_rerio_newGene_10835	Danio_rerio_newGene_10835	XR_662186.1		0.90272	0.844256	1.18987	1.00373	0.910507	0.54375			0.517286	0.843503	0.94003	0.948298	0.743403	0.791404
Danio_rerio_newGene_10837	Danio_rerio_newGene_24075	Danio_rerio_newGene_10837	Danio_rerio_newGene_10837	ENSDART00000142034		0.722397	0.456641	0.565621	0.758771	0.347282	0.385744			0.616806	0.806889	0.78769	0.518196	0.642436	0.541397
Danio_rerio_newGene_10840	Danio_rerio_newGene_24167	Danio_rerio_newGene_10840	Danio_rerio_newGene_10840	XR_224618.1		2.80753	2.07955	2.51865	2.88915	2.35684	3.22383			2.35341	2.39606	2.77374	2.39432	2.24762	3.46678
Danio_rerio_newGene_10842	Danio_rerio_newGene_24279	Danio_rerio_newGene_10842	Danio_rerio_newGene_10842	XR_224618.1		0	0.373831	0.0445335	0	0.153685	0.238149			0.207003	0.0201735	0	0.08715	0.132336	0
Danio_rerio_newGene_10843	Danio_rerio_newGene_24480	Danio_rerio_newGene_10843	Danio_rerio_newGene_10843	ENSDART00000157033		0.093544	0.152627	0.180696	0.07984	0.100495	0.0848925			0.154362	0.081516	0.191727	0.125425	0.100516	0.189096
Danio_rerio_newGene_10865	Danio_rerio_newGene_25009	Danio_rerio_newGene_10865	Danio_rerio_newGene_10865			7.53352	7.70881	5.87934	7.86561	8.11466	9.85422			6.28665	6.28338	5.51527	6.6133	9.56806	6.28934
Danio_rerio_newGene_10866	Danio_rerio_newGene_25024	Danio_rerio_newGene_10866	Danio_rerio_newGene_10866	XR_662136.1		0.05897	0.057489	0.0445585	0.0738255	0.078773	0.0105715			0.218649	0.196165	0.215819	0.408891	0.0864335	0.136059
Danio_rerio_newGene_10880	Danio_rerio_newGene_25027	Danio_rerio_newGene_10880	Danio_rerio_newGene_10880			0.800996	0.865582	0.836131	0.666651	0.501279	0.592474			0.737849	0.723624	1.22984	0.501989	0.582642	0.36365
Danio_rerio_newGene_109	Danio_rerio_newGene_25334	Danio_rerio_newGene_109	Danio_rerio_newGene_109	ENSDART00000150416		4.93255	3.36581	3.04902	2.38959	2.70207	2.2665			2.88635	1.85917	3.29332	2.04441	3.19037	3.27017
Danio_rerio_newGene_10925	Danio_rerio_newGene_25539	Danio_rerio_newGene_10925	Danio_rerio_newGene_10925	XR_663232.1		0.12991	0.133439	0.21071	0.202528	0.190734	0.176204			0.131821	0.321705	0.18559	0.168872	0.200247	0.091227
Danio_rerio_newGene_10927	Danio_rerio_newGene_25616	Danio_rerio_newGene_10927	Danio_rerio_newGene_10927	ENSDART00000154520		0.824151	0.385524	0.833438	0.683511	0.475904	0.389977			1.31019	0.953734	0.768381	0.725878	0.663859	0.797009
Danio_rerio_newGene_10932	Danio_rerio_newGene_25704	Danio_rerio_newGene_10932	Danio_rerio_newGene_10932	XR_663098.1		2.10623	2.07777	1.87757	2.17927	2.20355	2.51474			2.35581	2.76432	2.3807	2.34664	2.12921	2.58591
Danio_rerio_newGene_10937	Danio_rerio_newGene_273	Danio_rerio_newGene_10937	Danio_rerio_newGene_10937	XR_659048.1		0.343584	0.162006	0.342874	0.237887	0.161165	0.352396			0.200459	0.445543	0.177727	0.19596	0.260266	0.16538
Danio_rerio_newGene_10947	Danio_rerio_newGene_291	Danio_rerio_newGene_10947	Danio_rerio_newGene_10947	XR_223829.2		1.40503	2.09908	1.65373	1.47649	1.69091	1.65688			1.75552	1.62091	1.75306	1.69544	2.1786	1.31721
Danio_rerio_newGene_10950	Danio_rerio_newGene_2952	Danio_rerio_newGene_10950	Danio_rerio_newGene_10950	NONDRET002175		0.493812	0.471039	0.507716	1.00346	0.794242	1.02239			0.613723	1.43746	0.631318	1.49808	0.528473	0.837793
Danio_rerio_newGene_10952	Danio_rerio_newGene_3179	Danio_rerio_newGene_10952	Danio_rerio_newGene_10952	XR_224929.2		1.99204	1.95529	2.20636	2.11856	1.98781	3.16329			1.11568	1.6022	1.35651	2.24564	3.17225	1.30992
Danio_rerio_newGene_10954	Danio_rerio_newGene_3342	Danio_rerio_newGene_10954	Danio_rerio_newGene_10954	lnc_fbxo25		0.700848	1.52136	1.05769	1.21015	0.970461	1.35473			0.736147	1.01311	0.945593	0.86175	1.49632	1.20567
Danio_rerio_newGene_10958	Danio_rerio_newGene_3455	Danio_rerio_newGene_10958	Danio_rerio_newGene_10958	ENSDART00000057625		3.97762	4.22705	3.90934	3.82932	4.22261	4.34228			4.26743	4.18173	3.98306	4.95334	3.84712	2.8301
Danio_rerio_newGene_10959	Danio_rerio_newGene_3458	Danio_rerio_newGene_10959	Danio_rerio_newGene_10959	ENSDART00000057625		0.121501	0	0.160419	0.299863	0.065426	0.082362			0.162567	0	0.247116	0.0116585	0.165936	0.341126
Danio_rerio_newGene_10960	Danio_rerio_newGene_3504	Danio_rerio_newGene_10960	Danio_rerio_newGene_10960			1.25873	0.716047	1.71415	1.15576	1.36422	0.982554			1.38911	1.63733	1.65886	1.3278	1.17892	1.3893
Danio_rerio_newGene_10961	Danio_rerio_newGene_3643	Danio_rerio_newGene_10961	Danio_rerio_newGene_10961	ENSDART00000144134		0.539013	0.443937	0.210933	0.128029	0.389697	0.545195			0.354551	0.304419	0.233142	0.274976	0.340874	0.463896
Danio_rerio_newGene_10962	Danio_rerio_newGene_3883	Danio_rerio_newGene_10962	Danio_rerio_newGene_10962	XR_221953.2		1.4381	0.983137	1.13994	0.928632	0.801349	0.692554			1.13394	0.872714	1.15101	0.971577	0.875729	1.16403
Danio_rerio_newGene_10965	Danio_rerio_newGene_4	Danio_rerio_newGene_10965	Danio_rerio_newGene_10965	XR_663243.1		1.78119	2.22174	2.90813	3.16858	2.53757	2.30511			2.40247	2.08735	2.82147	2.83185	1.2414	0.756259
Danio_rerio_newGene_10971	Danio_rerio_newGene_4131	Danio_rerio_newGene_10971	Danio_rerio_newGene_10971			4.44866	6.87967	4.26754	4.48851	4.95569	5.14133			5.86109	4.85596	4.04698	3.64304	4.9434	0.577883
Danio_rerio_newGene_10972	Danio_rerio_newGene_4199	Danio_rerio_newGene_10972	Danio_rerio_newGene_10972	NONDRET003215		0.423455	0.113503	0.020092	0.184773	0	0.270709			0.0353695	0.171465	0.403216	0.0694265	0.120237	0.181632
Danio_rerio_newGene_10977	Danio_rerio_newGene_4206	Danio_rerio_newGene_10977	Danio_rerio_newGene_10977			6.21664	4.70446	4.73801	4.35008	4.36886	4.24024			5.38269	4.77136	5.14505	4.73032	5.05027	4.58533
Danio_rerio_newGene_10988	Danio_rerio_newGene_4363	Danio_rerio_newGene_10988	Danio_rerio_newGene_10988			0.157981	0.232599	0.377062	0.454331	0.263246	0.133973			0.493223	0.177161	0.327308	0.341709	0.33688	0.106932
Danio_rerio_newGene_10997	Danio_rerio_newGene_4457	Danio_rerio_newGene_10997	Danio_rerio_newGene_10997	ENSDART00000140355		0.920607	0.957127	0.913176	0.970684	0.948967	0.854966			0.864136	1.27278	1.21195	1.12692	0.615939	0.946585
Danio_rerio_newGene_11	Danio_rerio_newGene_4610	Danio_rerio_newGene_11	Danio_rerio_newGene_11	ENSDART00000135615		1.49459	1.33939	1.4915	1.73418	1.89792	1.94001			1.14223	1.75042	1.4217	1.59436	1.19641	1.02707
Danio_rerio_newGene_11000	Danio_rerio_newGene_5626	Danio_rerio_newGene_11000	Danio_rerio_newGene_11000	ENSDART00000155499		0.136566	0.107947	0	0	0.152212	0.0620965			0.246509	0.12756	0.153854	0	0.04376	0.346427
Danio_rerio_newGene_11003	Danio_rerio_newGene_5630	Danio_rerio_newGene_11003	Danio_rerio_newGene_11003	XR_660816.1		0	0.158785	0.105133	0.132718	0	0			0.0404465	0.039918	0	0	0	0
Danio_rerio_newGene_11020	Danio_rerio_newGene_5783	Danio_rerio_newGene_11020	Danio_rerio_newGene_11020	XR_221953.2		0.136024	0.532698	0.316447	0.221334	0.250509	0.193518			0.0761835	0.382858	0.31933	0.491567	0.399045	0.123312
Danio_rerio_newGene_11024	Danio_rerio_newGene_5866	Danio_rerio_newGene_11024	Danio_rerio_newGene_11024			0.102052	0.105324	0.11699	0.122575	0.076042	0.042827			0.254115	0.109344	0.243235	0.058618	0	0.0875745
Danio_rerio_newGene_1103	Danio_rerio_newGene_5938	Danio_rerio_newGene_1103	Danio_rerio_newGene_1103	NONDRET002890		15.5909	28.5366	9.50832	17.8051	37.9222	27.5456			35.5742	53.2227	30.573	28.5325	45.585	22.2135
Danio_rerio_newGene_1109	Danio_rerio_newGene_5943	Danio_rerio_newGene_1109	Danio_rerio_newGene_1109	XR_225015.2		0.219275	0.304716	0.201664	0.170189	0.276648	0.35773			0.107071	0.103591	0.373381	0.135002	0.087229	0.132386
Danio_rerio_newGene_11096	Danio_rerio_newGene_6054	Danio_rerio_newGene_11096	Danio_rerio_newGene_11096	XR_659685.1		0	0.188379	0.0945165	0	0	0			0	0	0.298389	0	0.0831015	0.0549895
Danio_rerio_newGene_111	Danio_rerio_newGene_6196	Danio_rerio_newGene_111	Danio_rerio_newGene_111	NONDRET003215		2.95999	5.10717	1.99711	2.90419	4.52861	5.14074			1.27561	2.46922	1.61353	3.35277	4.0749	4.61842
Danio_rerio_newGene_11122	Danio_rerio_newGene_6599	Danio_rerio_newGene_11122	Danio_rerio_newGene_11122	XR_662197.1		0.636393	0.658913	0.545712	0.342406	0.409388	0.448628			0.73273	0.471007	0.330161	0.128198	0.225614	0.305623
Danio_rerio_newGene_11144	Danio_rerio_newGene_6624	Danio_rerio_newGene_11144	Danio_rerio_newGene_11144			4.41903	3.7801	4.37467	5.20225	3.51401	3.80074			5.15281	6.31101	4.33139	4.32655	4.72971	3.96273
Danio_rerio_newGene_11148	Danio_rerio_newGene_6686	Danio_rerio_newGene_11148	Danio_rerio_newGene_11148	ENSDART00000137246		0.367804	0.304399	0.439202	0.208917	0.138963	0.308979			0.39257	0.291961	0.262586	0.434955	0.21596	0.591387
Danio_rerio_newGene_11152	Danio_rerio_newGene_6775	Danio_rerio_newGene_11152	Danio_rerio_newGene_11152			1.60451	2.22485	1.36847	1.44796	1.35047	1.72278			1.26816	1.62354	1.36132	1.41245	2.16443	1.70108
Danio_rerio_newGene_11154	Danio_rerio_newGene_6944	Danio_rerio_newGene_11154	Danio_rerio_newGene_11154	ENSDART00000131500		2.79373	2.62447	3.04004	2.14921	2.52627	2.97447			3.17718	2.97691	2.43586	2.55859	2.81684	2.15226
Danio_rerio_newGene_11160	Danio_rerio_newGene_6959	Danio_rerio_newGene_11160	Danio_rerio_newGene_11160	ENSDART00000151413		1.68809	1.64205	1.51219	1.07545	1.48858	1.64625			1.08774	1.65007	1.10099	0.823361	1.05978	0.644954
Danio_rerio_newGene_11178	Danio_rerio_newGene_7246	Danio_rerio_newGene_11178	Danio_rerio_newGene_11178			13.0376	1.57631	10.8145	2.17343	3.38715	1.73031			4.12133	5.43971	6.92699	5.55397	7.94282	3.83322
Danio_rerio_newGene_11188	Danio_rerio_newGene_7324	Danio_rerio_newGene_11188	Danio_rerio_newGene_11188	ENSDART00000157045		0.531594	0.238492	0.329809	0.41858	0.202025	0.399401			0.29567	0.430821	0.25585	0.292544	0.280298	0.250648
Danio_rerio_newGene_11190	Danio_rerio_newGene_7428	Danio_rerio_newGene_11190	Danio_rerio_newGene_11190	XR_662856.1		0.086962	0.099773	0.082746	0.0821845	0.128303	0.072311			0.147152	0.139116	0	0.149704	0.0162395	0.095638
Danio_rerio_newGene_11197	Danio_rerio_newGene_743	Danio_rerio_newGene_11197	Danio_rerio_newGene_11197	XR_117764.3		1.26257	0.860564	0.969705	0.75009	0.825072	0.99144			1.29532	1.33938	1.10418	1.02019	0.855211	1.05428
Danio_rerio_newGene_11202	Danio_rerio_newGene_7444	Danio_rerio_newGene_11202	Danio_rerio_newGene_11202	lnc_naca		2.70938	3.19875	3.49502	2.66148	2.83406	2.83499			2.08286	3.45473	4.06189	3.96159	2.86078	2.63674
Danio_rerio_newGene_11212	Danio_rerio_newGene_7606	Danio_rerio_newGene_11212	Danio_rerio_newGene_11212	XR_224452.2		6.5186	6.44612	8.34037	7.57379	7.08141	6.64227			6.57923	6.90291	6.84552	7.85157	7.92253	7.02413
Danio_rerio_newGene_11214	Danio_rerio_newGene_7631	Danio_rerio_newGene_11214	Danio_rerio_newGene_11214	ENSDART00000133826		5.093	5.79975	4.75929	7.58523	7.2798	6.24134			4.72595	5.62262	4.77724	5.11954	6.08105	3.52984
Danio_rerio_newGene_11217	Danio_rerio_newGene_7876	Danio_rerio_newGene_11217	Danio_rerio_newGene_11217	ENSDART00000144507		0.475073	0.187002	0.391641	0.579175	0.301328	0.186179			0.294587	0.470455	0.326952	0.260958	0.308419	0.306816
Danio_rerio_newGene_11227	Danio_rerio_newGene_7947	Danio_rerio_newGene_11227	Danio_rerio_newGene_11227	ENSDART00000154867		0.635927	0.767603	0.880868	0.444141	1.06419	1.51419			0.269224	0.408191	0.417594	0.343967	1.02936	0.46153
Danio_rerio_newGene_11241	Danio_rerio_newGene_8053	Danio_rerio_newGene_11241	Danio_rerio_newGene_11241			0.125833	0.280207	0.138397	0.241187	0.20751	0.342226			0.361963	0.546256	0.0692685	0.224793	0	0.192984
Danio_rerio_newGene_11243	Danio_rerio_newGene_8079	Danio_rerio_newGene_11243	Danio_rerio_newGene_11243	XR_661609.1		2.78339	2.38444	2.63634	2.5346	2.38087	3.18162			2.9312	2.82192	2.3199	2.76877	2.58122	2.45517
Danio_rerio_newGene_11271	Danio_rerio_newGene_8162	Danio_rerio_newGene_11271	Danio_rerio_newGene_11271	XR_662299.1		0.383738	0.773447	0.403046	0.569017	1.26362	0.875852			0.314333	0.657776	0.347546	0.711203	1.06949	0.375597
Danio_rerio_newGene_11291	Danio_rerio_newGene_8209	Danio_rerio_newGene_11291	Danio_rerio_newGene_11291	ENSDART00000139729		0.303995	0.090653	0.0914655	0	0.221836	0.15277			0.113444	0.0564855	0.017873	0.080323	0.058133	0
Danio_rerio_newGene_113	Danio_rerio_newGene_873	Danio_rerio_newGene_113	Danio_rerio_newGene_113	XR_225015.2		3.64266	3.56355	3.47095	2.76202	3.53027	2.71483			4.57095	3.88611	2.07669	2.65673	3.21343	2.80682
Danio_rerio_newGene_11311	Danio_rerio_newGene_8849	Danio_rerio_newGene_11311	Danio_rerio_newGene_11311	ENSDART00000153644		0.749675	0.563617	0.592724	0.526996	0.83592	0.528161			0.525138	0.60629	0.642861	0.798606	0.865322	0.408087
Danio_rerio_newGene_11314	Danio_rerio_newGene_9021	Danio_rerio_newGene_11314	Danio_rerio_newGene_11314			0	0	0	0	0	0			0	0	0.492007	0.167489	0	0
Danio_rerio_newGene_1134	Danio_rerio_newGene_9060	Danio_rerio_newGene_1134	Danio_rerio_newGene_1134	ENSDART00000149567		0.981238	0.56155	1.36677	0.788755	0.666146	0.799744			0.419082	0.336116	0.569355	0.389867	0.173071	0.574911
Danio_rerio_newGene_1136	Danio_rerio_newGene_9857	Danio_rerio_newGene_1136	Danio_rerio_newGene_1136	ENSDART00000140497		0.0613665	0.0593325	0.0578565	0.0783405	0.0522125	0.0230965			0.0361675	0.179451	0.030062	0.0869195	0.0419595	0.052453
Danio_rerio_newGene_11369	Danio_rerio_newGene_9859	Danio_rerio_newGene_11369	Danio_rerio_newGene_11369	NONDRET007138		0.133279	0.047457	0.244009	0.206233	0.188032	0.029541			0.0737225	0.118532	0.248352	0.065008	0.078198	0.0291065
Danio_rerio_newGene_1139	Danio_rerio_newGene_9940	Danio_rerio_newGene_1139	Danio_rerio_newGene_1139			2.94742	4.02962	2.3945	2.38529	3.05864	3.84755			2.77178	2.85733	2.04189	2.1972	2.60681	1.80185
Danio_rerio_newGene_11391		Danio_rerio_newGene_11391	Danio_rerio_newGene_11391	XR_223009.2		0.710643	0.7134	0.62339	0.550226	0.372407	0.322695			0.831101	1.08985	1.01846	0.891794	1.00111	0.720795
Danio_rerio_newGene_11408		Danio_rerio_newGene_11408	Danio_rerio_newGene_11408	ENSDART00000142658		0.940068	1.16721	1.09856	0.795206	0.274511	0.839716			0.0726055	0.38252	0.820067	0.389702	0.538875	0
Danio_rerio_newGene_1141		Danio_rerio_newGene_1141	Danio_rerio_newGene_1141	XR_661609.1		5.99637	7.06665	5.24972	7.45581	7.51925	8.02429			5.3757	6.22621	5.82128	5.73844	7.18875	8.11727
Danio_rerio_newGene_11416		Danio_rerio_newGene_11416	Danio_rerio_newGene_11416			2.12266	1.50025	1.19166	1.30159	1.31846	0.794111			1.07159	1.0736	1.4546	1.18054	0.948411	0.402424
Danio_rerio_newGene_1142		Danio_rerio_newGene_1142	Danio_rerio_newGene_1142	XR_661609.1		1.8633	3.34638	2.69087	2.50205	3.42378	3.78503			1.86465	2.06391	2.24459	2.14322	1.97341	1.9292
Danio_rerio_newGene_11427		Danio_rerio_newGene_11427	Danio_rerio_newGene_11427	XR_661845.1		0.163595	0.473032	0.208694	0.519521	0.338341	0.198307			0.138424	0.159608	0.386386	0.329161	0.558393	0.300882
Danio_rerio_newGene_1145		Danio_rerio_newGene_1145	Danio_rerio_newGene_1145	XR_222874.1		0.09094	0.178487	0.260124	0	0	0.401728			0.390103	0.57418	0	0	0.298919	0.314134
Danio_rerio_newGene_1146		Danio_rerio_newGene_1146	Danio_rerio_newGene_1146	ENSDART00000149567		0.475432	1.01616	0.5477	0.590046	0.949233	0.817921			0.592241	0.353164	0.460858	0.695791	0.471935	0.670663
Danio_rerio_newGene_11460		Danio_rerio_newGene_11460	Danio_rerio_newGene_11460			2.0063	2.91294	2.4107	2.64428	2.63139	2.85921			2.04274	2.93	2.23235	2.27685	2.81351	2.2546
Danio_rerio_newGene_1147		Danio_rerio_newGene_1147	Danio_rerio_newGene_1147	ENSDART00000143512		2.16361	2.22901	1.84767	2.24631	2.1659	2.20394			1.98619	1.95975	1.63601	2.09036	1.94479	1.88164
Danio_rerio_newGene_11479		Danio_rerio_newGene_11479	Danio_rerio_newGene_11479	XR_661683.1		0.395126	0.329386	0.472008	0.456537	0.295094	0.250659			0.498986	0.402682	0.349327	0.552185	0.611547	0.455857
Danio_rerio_newGene_11483		Danio_rerio_newGene_11483	Danio_rerio_newGene_11483	ENSDART00000151406		0	0.069321	0.19821	0.133865	0.0246515	0			0.102458	0.363127	0.761858	0.690391	0.236717	0.066307
Danio_rerio_newGene_11485		Danio_rerio_newGene_11485	Danio_rerio_newGene_11485	XR_659752.1		2.76215	9.09663	8.19907	12.1838	1.69837	0.682126			0.426053	1.85673	2.29856	2.64742	1.49124	0.890417
Danio_rerio_newGene_11489		Danio_rerio_newGene_11489	Danio_rerio_newGene_11489			0	0	0	0	0	0			0	0.084409	0	0	0	0
Danio_rerio_newGene_1149		Danio_rerio_newGene_1149	Danio_rerio_newGene_1149	ENSDART00000142658		4.72848	4.85566	4.17374	4.18723	4.28477	5.12053			4.93645	4.81154	5.55748	4.64645	5.24306	5.29603
Danio_rerio_newGene_11493		Danio_rerio_newGene_11493	Danio_rerio_newGene_11493	XR_658229.1		1.35582	2.04143	1.89844	2.8085	2.82023	2.33635			1.14828	1.47635	1.40878	1.89374	3.11414	2.51547
Danio_rerio_newGene_11494		Danio_rerio_newGene_11494	Danio_rerio_newGene_11494	XR_660339.1		0.863175	0.877692	0.454971	0.495988	0.785444	0.882784			0.642751	0.911348	0.6926	0.557123	0.601318	0.463
Danio_rerio_newGene_11522		Danio_rerio_newGene_11522	Danio_rerio_newGene_11522			1.1741	1.41838	1.46963	1.50273	1.64743	2.13175			1.25255	1.17397	1.0575	1.17421	1.66993	0.991699
Danio_rerio_newGene_11526		Danio_rerio_newGene_11526	Danio_rerio_newGene_11526	XR_221953.2		1.29356	1.64299	1.58573	2.57418	2.84144	2.85358			0.78095	1.1858	0.890157	1.57343	1.90534	1.04093
Danio_rerio_newGene_11535		Danio_rerio_newGene_11535	Danio_rerio_newGene_11535	XR_663232.1		1.19662	0.933677	0.672387	1.39272	0.342902	0.573089			0.181072	0.318881	0.519715	0.739823	0.72937	0.92172
Danio_rerio_newGene_11538		Danio_rerio_newGene_11538	Danio_rerio_newGene_11538	ENSDART00000151413		0.162106	0	0.10125	0.27746	0.0353195	0.070631			0	0.0674835	0.425339	0.283286	0.0736825	0
Danio_rerio_newGene_11539		Danio_rerio_newGene_11539	Danio_rerio_newGene_11539			3.79238	3.10751	2.266	2.2035	2.13242	1.9814			2.7107	3.00456	2.38584	2.08769	1.78987	2.46843
Danio_rerio_newGene_11540		Danio_rerio_newGene_11540	Danio_rerio_newGene_11540	ENSDART00000133520		3.98657	3.63424	3.25912	2.33336	2.96831	2.93502			4.10985	4.04074	4.27044	4.29822	2.14412	2.313
Danio_rerio_newGene_11544		Danio_rerio_newGene_11544	Danio_rerio_newGene_11544	XR_662136.1		2.50607	2.03094	1.87843	2.66647	1.37679	2.43283			1.59115	1.68526	1.98228	2.56387	1.69169	1.30552
Danio_rerio_newGene_11547		Danio_rerio_newGene_11547	Danio_rerio_newGene_11547	XR_660359.1		0.0992525	0.337226	0	0.232129	0.612071	0.145905			0	0.60304	0	0.722163	0.407007	0
Danio_rerio_newGene_11548		Danio_rerio_newGene_11548	Danio_rerio_newGene_11548	XR_662186.1		0.407842	0.235195	0.515595	0.5335	0.413218	0.51362			0.356193	0.412801	0.431401	0.552322	0.370333	0.278261
Danio_rerio_newGene_1156		Danio_rerio_newGene_1156	Danio_rerio_newGene_1156	XR_659497.1		15.4373	16.6272	16.4522	17.7923	16.2413	20.5456			18.7641	20.4646	18.3658	18.3524	20.2647	21.99
Danio_rerio_newGene_11561		Danio_rerio_newGene_11561	Danio_rerio_newGene_11561	XR_223855.2		15.1027	13.6273	11.9555	11.7988	11.5115	11.873			15.4789	13.5503	12.5624	12.2307	10.936	9.59176
Danio_rerio_newGene_11563		Danio_rerio_newGene_11563	Danio_rerio_newGene_11563			0.074622	0.037532	0.101507	0	0.269155	0.21561			0.018757	0.046603	0.126742	0	0.170789	0.0756735
Danio_rerio_newGene_11582		Danio_rerio_newGene_11582	Danio_rerio_newGene_11582	XR_223148.2		0.935966	0.325029	0.199331	0.2085	0.257032	0.178644			0.342683	0.425776	0.466499	0.302574	0.349301	0.356078
Danio_rerio_newGene_11595		Danio_rerio_newGene_11595	Danio_rerio_newGene_11595	XR_663198.1		0.078831	0.050901	0.178625	0.423783	0.660681	0			0.135454	0.205944	0.142384	0.503828	0.255588	0.321531
Danio_rerio_newGene_11596		Danio_rerio_newGene_11596	Danio_rerio_newGene_11596	XR_663198.1		2.48936	2.97685	3.00312	3.09006	2.89871	3.38464			2.71336	2.71184	3.19023	2.97091	3.29752	2.97074
Danio_rerio_newGene_11607		Danio_rerio_newGene_11607	Danio_rerio_newGene_11607	XR_221953.2		0.959894	0.0792875	0.128034	0.288057	0.552018	0.389328			0.090009	0.140315	0.195998	0.6767	0.230484	0.115879
Danio_rerio_newGene_11626		Danio_rerio_newGene_11626	Danio_rerio_newGene_11626			8.06365	7.43023	6.97771	8.43417	8.51245	9.48668			8.83375	8.38987	8.01191	7.39799	9.49187	6.37631
Danio_rerio_newGene_11632		Danio_rerio_newGene_11632	Danio_rerio_newGene_11632	XR_659766.1		0.015255	0.122161	0	0	0	0			0.040724	0.140185	0.118117	0	0.160652	0
Danio_rerio_newGene_11634		Danio_rerio_newGene_11634	Danio_rerio_newGene_11634	ENSDART00000140497		0.337757	0.369683	0.0968815	0.40246	0.341075	0.252346			0.291702	0.26168	0	0.15543	0.272923	0.428368
Danio_rerio_newGene_11635		Danio_rerio_newGene_11635	Danio_rerio_newGene_11635	XR_223101.2		0	0.275608	0	0.400196	0.101387	0.158165			0.167231	0.104156	0.159822	0	0.0750975	0.264777
Danio_rerio_newGene_11654		Danio_rerio_newGene_11654	Danio_rerio_newGene_11654	ENSDART00000131500		6.07397	6.66218	5.89274	4.49887	4.47053	3.68538			7.07034	7.35216	8.52841	6.63285	5.99578	5.28488
Danio_rerio_newGene_11656		Danio_rerio_newGene_11656	Danio_rerio_newGene_11656	XR_223028.2		0.158819	0.143005	0.114434	0.153207	0.080159	0.065208			0.40762	0.1419	0.274373	0.0935155	0.0714535	0.310067
Danio_rerio_newGene_11657		Danio_rerio_newGene_11657	Danio_rerio_newGene_11657	XR_659048.1		0.103097	0.123169	0.228483	0.187206	0.191987	0.226597			0.145971	0.200449	0.341026	0.329296	0.255932	0.020773
Danio_rerio_newGene_11667		Danio_rerio_newGene_11667	Danio_rerio_newGene_11667	ENSDART00000154394		0.511782	0.563616	0.304026	0.424548	0.739448	0.62278			0.34678	0.553176	0.345452	0.442536	0.767382	0.474401
Danio_rerio_newGene_11671		Danio_rerio_newGene_11671	Danio_rerio_newGene_11671	ENSDART00000155099		5.03976	3.74084	5.0079	4.8142	4.82508	5.25316			4.97158	5.3351	4.78784	6.50942	4.32602	5.90293
Danio_rerio_newGene_11679		Danio_rerio_newGene_11679	Danio_rerio_newGene_11679			0.988196	1.30331	0.744491	1.19079	0.954417	1.35061			1.26171	1.10931	0.540076	0.779196	1.02664	1.40994
Danio_rerio_newGene_11682		Danio_rerio_newGene_11682	Danio_rerio_newGene_11682	XR_661644.1		1.0911	1.90173	1.28019	1.1728	1.2466	1.1686			1.03409	1.35586	0.992378	1.05035	1.58988	1.15501
Danio_rerio_newGene_1169		Danio_rerio_newGene_1169	Danio_rerio_newGene_1169	NONDRET003215		0.826548	1.57253	0.837519	1.13579	1.23049	1.23537			0.76242	0.840067	0.775203	0.80741	1.34311	0.899952
Danio_rerio_newGene_11691		Danio_rerio_newGene_11691	Danio_rerio_newGene_11691	XR_223116.2		1.51935	0.198222	0.862552	0.541433	0.262115	0.347312			0.202178	0.50523	1.09504	0.302653	0.364425	0.57893
Danio_rerio_newGene_11698		Danio_rerio_newGene_11698	Danio_rerio_newGene_11698	XR_225015.2		2.78957	2.36185	3.807	4.5446	2.84385	3.64288			3.1707	3.7633	4.04118	3.51046	4.6053	4.88909
Danio_rerio_newGene_11703		Danio_rerio_newGene_11703	Danio_rerio_newGene_11703	XR_659496.1		1.96809	2.79321	4.89207	3.70739	2.6673	3.34159			1.98934	1.7251	1.66843	1.58995	2.1749	1.15152
Danio_rerio_newGene_11709		Danio_rerio_newGene_11709	Danio_rerio_newGene_11709	ENSDART00000150442		0.175245	0.118557	0.333989	0.280574	0.026718	0.295801			0.202067	0.175602	0.108565	0.341255	0.452803	0.311511
Danio_rerio_newGene_1171		Danio_rerio_newGene_1171	Danio_rerio_newGene_1171	NONDRET002885		1.19335	1.51478	1.15855	1.46947	1.79037	1.42422			1.31393	1.66918	1.33508	1.73847	1.59738	1.36289
Danio_rerio_newGene_11717		Danio_rerio_newGene_11717	Danio_rerio_newGene_11717	ENSDART00000148470		0.678539	0.49409	0.686815	0.518451	0.574075	0.756729			0.950758	0.883492	0.368984	0.886954	0.575599	0.276642
Danio_rerio_newGene_11718		Danio_rerio_newGene_11718	Danio_rerio_newGene_11718			0.979449	0.613368	0.885119	0.815908	1.44262	1.2821			0.94463	0.760263	0.741521	0.64346	1.10548	0.744422
Danio_rerio_newGene_11721		Danio_rerio_newGene_11721	Danio_rerio_newGene_11721	XR_224983.2		2.99122	2.54222	3.1527	1.98173	2.19214	3.22123			2.51401	1.20824	2.68298	2.30571	2.41459	1.7906
Danio_rerio_newGene_11723		Danio_rerio_newGene_11723	Danio_rerio_newGene_11723	XR_662186.1		2.19785	1.67975	2.09748	1.08307	2.05223	1.62235			1.92112	1.64993	2.07853	1.98192	1.45168	1.20851
Danio_rerio_newGene_11726		Danio_rerio_newGene_11726	Danio_rerio_newGene_11726	ENSDART00000149567		1.05226	0.816877	1.01613	0.63668	0.771294	0.878023			0.655444	0.691553	0.861203	0.638124	0.529959	0.77833
Danio_rerio_newGene_11728		Danio_rerio_newGene_11728	Danio_rerio_newGene_11728	fzd6ia		1.41766	2.03356	1.29415	1.15599	2.22574	1.80266			1.92349	1.5769	1.51778	1.80277	2.14371	1.26497
Danio_rerio_newGene_11729		Danio_rerio_newGene_11729	Danio_rerio_newGene_11729	fzd6ia		0	0.053101	0.088012	0.0134755	0	0.0213795			0	0.029696	0.022878	0.008512	0.111793	0.0248385
Danio_rerio_newGene_11731		Danio_rerio_newGene_11731	Danio_rerio_newGene_11731	ENSDART00000144692		7.71214	10.3414	8.08122	9.59134	8.73336	11.0195			6.7169	9.05507	6.04752	7.74241	7.19425	6.11221
Danio_rerio_newGene_11733		Danio_rerio_newGene_11733	Danio_rerio_newGene_11733	ENSDART00000156338		4.39109	8.39383	6.88612	8.06831	4.41175	6.93733			3.17103	5.03351	4.14285	3.75451	4.77026	3.29693
Danio_rerio_newGene_11737		Danio_rerio_newGene_11737	Danio_rerio_newGene_11737	ENSDART00000149567		1.22503	1.20176	1.64844	1.32772	1.47611	1.32757			1.00734	1.35455	1.26611	1.31333	1.22553	1.40152
Danio_rerio_newGene_11742		Danio_rerio_newGene_11742	Danio_rerio_newGene_11742	XR_663232.1		0	0.0989165	0.109074	0.037223	0.094442	0.0443905			0.125095	0.075545	0	0.110795	0.036814	0.086823
Danio_rerio_newGene_11745		Danio_rerio_newGene_11745	Danio_rerio_newGene_11745	XR_224941.2		21.2441	17.6523	19.0722	20.6686	15.6827	19.5096			19.3629	19.1678	27.9591	21.4633	19.9059	24.7708
Danio_rerio_newGene_11746		Danio_rerio_newGene_11746	Danio_rerio_newGene_11746	XR_659721.1		0.940176	1.13166	1.35254	1.53662	0.806691	1.4798			1.75191	1.30039	1.81588	0.859062	1.75257	1.9979
Danio_rerio_newGene_11748		Danio_rerio_newGene_11748	Danio_rerio_newGene_11748	XR_659771.1		3.34876	5.32615	3.57549	3.37068	3.11241	3.54091			4.1074	4.62785	4.07348	2.81607	4.73707	5.27061
Danio_rerio_newGene_11753		Danio_rerio_newGene_11753	Danio_rerio_newGene_11753	ENSDART00000131801		0.398996	0.426261	0.213799	0.459775	0.376891	0.703894			0.100059	0.43179	0.429374	0.489317	0.437863	0.22615
Danio_rerio_newGene_11772		Danio_rerio_newGene_11772	Danio_rerio_newGene_11772	ENSDART00000153644		1.14617	2.09293	0.954721	0.859438	1.38502	0.707773			1.60146	0.877528	0.944674	1.24316	1.12524	0.353164
Danio_rerio_newGene_11773		Danio_rerio_newGene_11773	Danio_rerio_newGene_11773	XR_662566.1		4.2875	4.66247	2.68998	3.16419	4.0739	3.71564			3.79482	3.66028	2.4954	2.85448	3.19016	1.937
Danio_rerio_newGene_11774		Danio_rerio_newGene_11774	Danio_rerio_newGene_11774	ENSDART00000149567		0.0518385	0.381404	0	0.0426295	0.018587	0.190976			0.143609	0.249168	0	0.378619	0.268055	0.028874
Danio_rerio_newGene_11775		Danio_rerio_newGene_11775	Danio_rerio_newGene_11775	ENSDART00000135615		3.63238	4.12065	5.416	6.1011	5.47935	7.10529			4.69497	4.47936	5.88482	6.48285	7.61234	7.41452
Danio_rerio_newGene_11781		Danio_rerio_newGene_11781	Danio_rerio_newGene_11781			0.685846	0.585868	0.836776	0.748235	0.968179	0.826596			0.598569	0.757178	0.937273	0.761896	0.53692	0.462789
Danio_rerio_newGene_11786		Danio_rerio_newGene_11786	Danio_rerio_newGene_11786			1.52548	1.98978	2.97966	2.33944	2.05014	2.89939			1.75116	1.67531	2.56589	1.9894	3.0808	2.60592
Danio_rerio_newGene_11797		Danio_rerio_newGene_11797	Danio_rerio_newGene_11797	XR_659782.1		1.03449	1.16334	0.450456	0.507691	0.888337	0.916247			0.491665	0.507177	0.387437	0.316974	0.244807	0.226711
Danio_rerio_newGene_11798		Danio_rerio_newGene_11798	Danio_rerio_newGene_11798	NONDRET007350		0.302638	0.423153	0.235531	0.0995285	0.227129	0.301691			0.0618655	0.17012	0.287948	0.0903995	0.107168	0.108337
Danio_rerio_newGene_11814		Danio_rerio_newGene_11814	Danio_rerio_newGene_11814			2.1611	1.64792	1.81625	1.59355	2.11522	1.90641			1.37304	1.82746	2.09104	1.84154	1.28315	0.869241
Danio_rerio_newGene_11816		Danio_rerio_newGene_11816	Danio_rerio_newGene_11816	ENSDART00000152063		0.193884	0.166636	0.147048	0.218792	0.284464	0.422128			0.0334455	0.14944	0.062653	0.139164	0.153478	0.320441
Danio_rerio_newGene_11818		Danio_rerio_newGene_11818	Danio_rerio_newGene_11818			1.04567	1.17673	1.46695	1.09196	0.618302	1.17189			1.08742	1.89517	1.19608	1.34757	1.13253	1.2936
Danio_rerio_newGene_11819		Danio_rerio_newGene_11819	Danio_rerio_newGene_11819	XR_661920.1		0.788896	1.12683	0.949094	1.14705	1.107	1.34168			0.921211	1.37067	0.552179	1.29225	0.888418	0.832351
Danio_rerio_newGene_1182		Danio_rerio_newGene_1182	Danio_rerio_newGene_1182			1.3464	1.75899	0.77852	1.83627	1.43169	1.43259			1.6724	1.24046	0.99568	1.51889	1.82129	0.671175
Danio_rerio_newGene_11821		Danio_rerio_newGene_11821	Danio_rerio_newGene_11821	XR_659324.1		1.05241	1.13962	1.38877	1.24104	1.20115	1.34868			1.09472	1.25928	1.5183	1.35176	1.15091	1.04509
Danio_rerio_newGene_11824		Danio_rerio_newGene_11824	Danio_rerio_newGene_11824	XR_660825.1		0.235648	0.100378	0	0	0.13268	0.051695			0.208503	0.0972525	0.053597	0.0974355	0.052494	0.0559775
Danio_rerio_newGene_11827		Danio_rerio_newGene_11827	Danio_rerio_newGene_11827	ENSDART00000144134		2.10247	2.0604	2.36246	2.05427	2.7006	2.22433			0.907028	3.41064	2.24625	2.57001	2.81438	1.32637
Danio_rerio_newGene_11839		Danio_rerio_newGene_11839	Danio_rerio_newGene_11839			0.812404	0.865741	1.36585	1.7376	1.6981	1.33386			0.777268	1.15901	1.01742	1.1486	1.48183	1.65754
Danio_rerio_newGene_11846		Danio_rerio_newGene_11846	Danio_rerio_newGene_11846	XR_223148.2		1.16047	1.78632	1.30781	1.78046	1.40215	1.50859			1.30644	1.37312	1.31457	0.961361	1.19463	1.76217
Danio_rerio_newGene_11847		Danio_rerio_newGene_11847	Danio_rerio_newGene_11847	lnc1_hells		0.475708	0.424789	0.432916	0.360036	0.457711	0.114287			0.115891	0.27085	0.213052	0.595534	0.252294	0.278402
Danio_rerio_newGene_11887		Danio_rerio_newGene_11887	Danio_rerio_newGene_11887	XR_659797.1		0.032784	0.0915815	0.329295	0.0552105	0.029385	0.021326			0.210085	0.225127	0.0686165	0	0	0.0523085
Danio_rerio_newGene_11888		Danio_rerio_newGene_11888	Danio_rerio_newGene_11888	XR_659798.1		0.158285	0.029405	0.08912	0.212232	0.14931	0.179895			0.086153	0.144158	0.0545895	0.0414815	0.059488	0.104263
Danio_rerio_newGene_11890		Danio_rerio_newGene_11890	Danio_rerio_newGene_11890	ENSDART00000153714		0	0	0	0	0	0			0	0.14662	0	0	0	0.062597
Danio_rerio_newGene_11895		Danio_rerio_newGene_11895	Danio_rerio_newGene_11895			0.0504655	0.290075	0	0.209993	0	0.142759			0.172269	0.131624	0.0326545	0.152747	0	0.134429
Danio_rerio_newGene_11899		Danio_rerio_newGene_11899	Danio_rerio_newGene_11899	XR_659799.1		2.72331	3.93915	2.61034	2.79259	3.40651	3.72158			2.08594	2.98821	2.27299	2.18093	3.70071	2.87614
Danio_rerio_newGene_11911		Danio_rerio_newGene_11911	Danio_rerio_newGene_11911	ENSDART00000157225		0.677741	0.382837	0.667571	0.714317	0.260576	0.540266			0.381614	0.636825	0.54368	0.558528	0.736403	0.421723
Danio_rerio_newGene_11915		Danio_rerio_newGene_11915	Danio_rerio_newGene_11915	ENSDART00000140235		0.0987465	0.2127	0.068191	0.173465	0.10607	0.337178			0.169635	0.203133	0.210154	0.129078	0.399718	0.476633
Danio_rerio_newGene_11937		Danio_rerio_newGene_11937	Danio_rerio_newGene_11937			0.0749865	0.172156	0.170915	0.0823805	0.184263	0.190736			0	0.0613595	0.07037	0	0.11807	0.121413
Danio_rerio_newGene_11952		Danio_rerio_newGene_11952	Danio_rerio_newGene_11952	XR_662586.1		0.062016	0.306338	0.0409035	0.104962	0.196731	0.351422			0.200744	0.16848	0.1293	0.200059	0.112435	0.152596
Danio_rerio_newGene_11970		Danio_rerio_newGene_11970	Danio_rerio_newGene_11970	ENSDART00000140497		0.229859	0.178775	0.09139	0.157945	0.071897	0.110341			0.108483	0.148234	0.108294	0.208137	0.033067	0.038147
Danio_rerio_newGene_11989		Danio_rerio_newGene_11989	Danio_rerio_newGene_11989	XR_663248.1		1.81248	2.12329	1.38146	1.11705	1.11094	2.19705			2.06378	2.08794	2.00033	0.975418	1.85801	2.47597
Danio_rerio_newGene_11994		Danio_rerio_newGene_11994	Danio_rerio_newGene_11994	ENSDART00000132404		0.592426	1.56654	0.488807	0.995587	1.60965	1.22235			0.33525	0.467963	0.514914	0.889055	1.10185	0.775999
Danio_rerio_newGene_12023		Danio_rerio_newGene_12023	Danio_rerio_newGene_12023	NONDRET004184		0.126953	0.114616	0	0.135655	0.19737	0.039249			0.0292935	0.07462	0	0.30798	0	0
Danio_rerio_newGene_12031		Danio_rerio_newGene_12031	Danio_rerio_newGene_12031			0.169917	0.160127	0.182117	0.178993	0.190317	0.185997			0.125071	0.139604	0.149124	0.235434	0.117415	0.160475
Danio_rerio_newGene_1204		Danio_rerio_newGene_1204	Danio_rerio_newGene_1204	XR_661479.1		1.32823	1.46493	1.2225	1.04132	1.77039	1.16358			0.792933	1.03184	0.667922	0.946198	1.09421	0.909569
Danio_rerio_newGene_12059		Danio_rerio_newGene_12059	Danio_rerio_newGene_12059			0	0.523985	0.84111	0.413396	0.217686	0.052847			0.200231	0.776779	0.726261	0.147964	0.375105	0.355557
Danio_rerio_newGene_12065		Danio_rerio_newGene_12065	Danio_rerio_newGene_12065			0	0.306483	0.0553085	0.1027	0	0			0.413681	0	0.0149225	0.045639	0.062331	0
Danio_rerio_newGene_1209		Danio_rerio_newGene_1209	Danio_rerio_newGene_1209			12.8528	9.24409	10.2985	9.5154	8.75762	8.8607			10.4194	8.9494	11.1117	10.1027	9.7625	11.1927
Danio_rerio_newGene_12092		Danio_rerio_newGene_12092	Danio_rerio_newGene_12092	XR_659721.1		0	0.328019	0	0	0	0			0	0	0	0.0503295	0	0.140362
Danio_rerio_newGene_12099		Danio_rerio_newGene_12099	Danio_rerio_newGene_12099	XR_223829.2		0.144462	0.235897	0	0	0	0.35011			0	0	0.141322	0	0.095409	0.115726
Danio_rerio_newGene_12101		Danio_rerio_newGene_12101	Danio_rerio_newGene_12101	ENSDART00000151413		0.510024	0.971855	0.75724	0.698962	1.25081	0.636111			0.752873	0.326874	0.978467	0.69323	1.12666	0.795277
Danio_rerio_newGene_1212		Danio_rerio_newGene_1212	Danio_rerio_newGene_1212	lnc_zgc:158643		10.4681	9.53768	7.43189	7.08792	8.63126	7.869			10.1025	8.68467	6.33873	6.46247	7.8288	5.99584
Danio_rerio_newGene_12137		Danio_rerio_newGene_12137	Danio_rerio_newGene_12137	ENSDART00000157329		0	0.030644	0.147379	0.0753315	0.0211105	0.103816			0	0.102279	0.0197915	0.043611	0.037034	0.197419
Danio_rerio_newGene_12138		Danio_rerio_newGene_12138	Danio_rerio_newGene_12138	XR_662333.1		0	0	0.0609025	0	0	0.042318			0	0	0	0	0.0416505	0
Danio_rerio_newGene_12140		Danio_rerio_newGene_12140	Danio_rerio_newGene_12140	ENSDART00000153858		0.389061	0.362096	0.296787	0.379043	0.339915	0.459713			0.44809	0.402956	0.244501	0.34959	0.368282	0.390095
Danio_rerio_newGene_12141		Danio_rerio_newGene_12141	Danio_rerio_newGene_12141	ENSDART00000156534		0.363629	0.332921	0.552424	0.486011	0.479695	0.540396			0.369043	0.643993	0.389867	0.360058	0.621166	0.482447
Danio_rerio_newGene_12158		Danio_rerio_newGene_12158	Danio_rerio_newGene_12158	ENSDART00000140235		0.842093	0.806579	0.933771	0.979729	0.738661	0.869123			0.568474	0.913942	0.862757	0.876124	0.500971	1.12752
Danio_rerio_newGene_12159		Danio_rerio_newGene_12159	Danio_rerio_newGene_12159	ENSDART00000150369		0.329861	0.83086	0.71961	0.452598	0.563322	0.692895			0.54177	0.564825	0.670664	0.359939	0.607127	0.539007
Danio_rerio_newGene_1216		Danio_rerio_newGene_1216	Danio_rerio_newGene_1216	XR_223516.2		4.07857	4.27435	4.08806	4.93114	5.2075	5.14689			4.36873	2.94163	4.04797	3.89671	4.40962	4.20752
Danio_rerio_newGene_12167		Danio_rerio_newGene_12167	Danio_rerio_newGene_12167	XR_659303.1		1.10496	1.30097	0.995635	1.11118	1.52083	1.68436			0.842638	1.15841	1.31168	1.24742	1.56673	1.47601
Danio_rerio_newGene_12182		Danio_rerio_newGene_12182	Danio_rerio_newGene_12182	XR_224524.2		0.551172	0.386698	0.282268	0.364731	0.295968	0.22183			0.19579	0.392199	0.288447	0.252663	0.199346	0.195188
Danio_rerio_newGene_122		Danio_rerio_newGene_122	Danio_rerio_newGene_122	XR_660480.1		0.958546	1.18464	1.08501	0.920312	1.00907	0.796534			0.834748	1.01806	1.01833	0.977197	0.772422	0.808863
Danio_rerio_newGene_12205		Danio_rerio_newGene_12205	Danio_rerio_newGene_12205	XR_660265.1		0	0	0	0.566004	0	0.112133			0	0.238005	0	0.182793	0	0
Danio_rerio_newGene_12209		Danio_rerio_newGene_12209	Danio_rerio_newGene_12209			0.351677	0.408641	0.173942	0.257849	0.123839	0.318722			0.192761	0.179123	0.307287	0.195692	0.319381	0.210987
Danio_rerio_newGene_12217		Danio_rerio_newGene_12217	Danio_rerio_newGene_12217			0.299533	0.233829	0.103598	0.192527	0.085536	0.055432			0.0623135	0.157856	0.180933	0.0974215	0.050459	0.098612
Danio_rerio_newGene_12229		Danio_rerio_newGene_12229	Danio_rerio_newGene_12229			0.473116	0.375561	0.205898	0.655913	0.54043	0.501748			0.217554	0.445981	0.500193	0.507966	0.570147	0.333119
Danio_rerio_newGene_1224		Danio_rerio_newGene_1224	Danio_rerio_newGene_1224	cyp2y3pa		9.60774	11.6631	7.05566	9.34418	8.66104	12.3866			7.03328	9.40283	6.0671	6.36242	13.2662	13.0299
Danio_rerio_newGene_12254		Danio_rerio_newGene_12254	Danio_rerio_newGene_12254	XR_659831.1		4.35457	4.82637	3.8793	4.21706	3.93632	4.57845			4.2545	4.53718	4.03607	4.36559	4.64868	4.88642
Danio_rerio_newGene_12260		Danio_rerio_newGene_12260	Danio_rerio_newGene_12260	ENSDART00000155099		1.50088	1.38736	1.13647	1.0211	0.689747	0.971548			0.802307	1.20831	1.001	1.06133	0.665412	0.445331
Danio_rerio_newGene_12278		Danio_rerio_newGene_12278	Danio_rerio_newGene_12278	ENSDART00000139724		0.347821	0.456708	0.535141	0.612147	0.306983	0.489642			0.404435	0.526852	0.516943	0.536832	0.823414	0.655892
Danio_rerio_newGene_12285		Danio_rerio_newGene_12285	Danio_rerio_newGene_12285	ENSDART00000141262		1.78218	2.03704	1.43443	1.84111	1.42874	2.33264			2.00174	1.97781	2.3488	2.7474	2.71782	2.23525
Danio_rerio_newGene_12307		Danio_rerio_newGene_12307	Danio_rerio_newGene_12307			0.379567	0.235252	0.10275	0.10807	0.206366	0.181145			0.379802	0.153175	0.258568	0.270693	0.061243	0.495866
Danio_rerio_newGene_1232		Danio_rerio_newGene_1232	Danio_rerio_newGene_1232			0.332964	0.111232	0.185228	0.373275	0	0			0.237266	0.0281135	0.271164	0.053791	0	0.074917
Danio_rerio_newGene_12320		Danio_rerio_newGene_12320	Danio_rerio_newGene_12320	XR_659748.1		0.317983	0.64308	0.396732	0.280905	0.677015	0.681394			0.146437	0.424144	0.250368	0.25918	0.149365	0.190841
Danio_rerio_newGene_12328		Danio_rerio_newGene_12328	Danio_rerio_newGene_12328	XR_224817.2		2.81046	3.30679	3.88617	3.1916	3.45635	4.11454			2.36731	2.90285	3.93295	3.04081	4.40152	3.32048
Danio_rerio_newGene_12330		Danio_rerio_newGene_12330	Danio_rerio_newGene_12330	XR_663232.1		4.77767	4.7482	4.19975	4.22277	3.30452	4.00293			3.74241	4.20434	3.56582	3.81008	4.11851	3.64067
Danio_rerio_newGene_12335		Danio_rerio_newGene_12335	Danio_rerio_newGene_12335	ENSDART00000154572		9.98683	12.1757	9.56296	10.6167	12.6458	12.9207			9.71805	10.2871	10.2759	9.3706	11.7351	10.8947
Danio_rerio_newGene_1234		Danio_rerio_newGene_1234	Danio_rerio_newGene_1234	XR_225193.2		4.12105	3.55348	3.40969	3.68982	4.5516	4.24884			3.70228	3.69358	3.0416	4.17715	3.69616	2.75774
Danio_rerio_newGene_12344		Danio_rerio_newGene_12344	Danio_rerio_newGene_12344			4.595	5.88328	5.20033	5.64134	4.00005	6.10106			5.93212	5.56326	5.50235	4.96359	6.11868	5.25196
Danio_rerio_newGene_12349		Danio_rerio_newGene_12349	Danio_rerio_newGene_12349			11.0351	15.3585	13.2238	15.3028	16.356	14.3624			10.2645	12.7529	13.9946	15.1015	16.4693	13.5051
Danio_rerio_newGene_12354		Danio_rerio_newGene_12354	Danio_rerio_newGene_12354	ENSDART00000155319		0.528216	1.24257	0.901393	0.848889	1.00375	1.23802			0.924455	0.903649	0.836058	0.662361	1.26869	1.08796
Danio_rerio_newGene_12357		Danio_rerio_newGene_12357	Danio_rerio_newGene_12357	ENSDART00000149567		3.75704	3.67338	3.57793	3.56075	3.99758	3.66912			3.54631	3.28923	3.38529	3.83268	3.56559	2.66162
Danio_rerio_newGene_12358		Danio_rerio_newGene_12358	Danio_rerio_newGene_12358	ENSDART00000149567		4.4227	4.98189	4.50589	5.56156	5.87545	4.26007			3.64402	4.3835	4.77176	6.11145	3.90009	2.73588
Danio_rerio_newGene_1236		Danio_rerio_newGene_1236	Danio_rerio_newGene_1236	ENSDART00000157158		6.53312	7.61008	7.68029	9.63958	10.6414	8.85448			7.26325	6.43112	7.79697	9.25289	10.7226	9.63392
Danio_rerio_newGene_12367		Danio_rerio_newGene_12367	Danio_rerio_newGene_12367	ENSDART00000136106		3.21856	4.12995	3.15848	3.70036	3.89059	3.24384			2.19706	3.73054	2.94157	4.48117	3.02808	3.04619
Danio_rerio_newGene_12372		Danio_rerio_newGene_12372	Danio_rerio_newGene_12372	ENSDART00000154282		1.07073	0.775828	0.528335	0.465006	0.643262	0.456508			2.10229	1.99926	2.30172	1.91472	1.63165	2.02605
Danio_rerio_newGene_12382		Danio_rerio_newGene_12382	Danio_rerio_newGene_12382	XR_660825.1		1.04289	1.10971	1.21891	0.857105	0.823929	1.53973			0.79801	1.16639	0.762852	0.876108	0.720285	0.93247
Danio_rerio_newGene_12383		Danio_rerio_newGene_12383	Danio_rerio_newGene_12383	XR_662197.1		1.01241	1.28174	1.19524	1.46502	1.05601	1.18242			0.852294	1.1859	1.00093	1.28545	1.20557	0.947286
Danio_rerio_newGene_12399		Danio_rerio_newGene_12399	Danio_rerio_newGene_12399	XR_660825.1		3.81538	6.44881	4.76761	6.59808	6.37074	6.77415			4.24112	5.6024	4.43688	5.62794	7.55662	4.94572
Danio_rerio_newGene_12409		Danio_rerio_newGene_12409	Danio_rerio_newGene_12409	ENSDART00000140235		1.12734	1.10089	1.21801	1.13655	1.01896	1.24163			0.996714	1.06265	1.11365	0.949217	1.04805	0.925422
Danio_rerio_newGene_12411		Danio_rerio_newGene_12411	Danio_rerio_newGene_12411	XR_659721.1		0.899707	0.544589	0.876623	0.814287	0.580996	0.931088			0.508383	1.43157	0.990318	0.646597	0.842826	0.61682
Danio_rerio_newGene_12412		Danio_rerio_newGene_12412	Danio_rerio_newGene_12412	XR_660825.1		0.173344	0.667087	0.266848	2.17528	0.515688	0.36071			1.18743	1.30244	1.04429	2.28102	1.12411	1.80289
Danio_rerio_newGene_12413		Danio_rerio_newGene_12413	Danio_rerio_newGene_12413	XR_661827.1		0	0	0.262179	0	0.192699	0			0	0.024183	0.0608725	0	0.197108	0
Danio_rerio_newGene_12430		Danio_rerio_newGene_12430	Danio_rerio_newGene_12430	XR_225260.2		4.82829	6.55139	4.85603	5.67904	5.6983	5.77167			4.34317	5.46953	3.14612	4.65084	5.53939	3.57765
Danio_rerio_newGene_12431		Danio_rerio_newGene_12431	Danio_rerio_newGene_12431	XR_225015.2		4.50231	6.3439	4.1018	5.72242	5.95453	6.03626			5.01596	5.17558	4.05835	4.35087	5.38105	3.79499
Danio_rerio_newGene_12440		Danio_rerio_newGene_12440	Danio_rerio_newGene_12440	XR_660265.1		0.521869	0.478384	0.405197	0.199143	0.333376	0.623966			0.921597	1.04346	0.2331	0.489945	0.447719	0
Danio_rerio_newGene_12445		Danio_rerio_newGene_12445	Danio_rerio_newGene_12445	XR_663251.1		0.114227	0.06635	0.549739	0.152325	0.158511	0.105377			0	0.227625	0.239289	0.101708	0.247639	0.283631
Danio_rerio_newGene_12446		Danio_rerio_newGene_12446	Danio_rerio_newGene_12446	XR_659429.1		1.70589	1.5787	1.81272	1.71594	1.52758	2.02524			1.61271	1.5189	2.30907	2.40484	1.99836	2.14967
Danio_rerio_newGene_12447		Danio_rerio_newGene_12447	Danio_rerio_newGene_12447	XR_221953.2		0.894911	0.915269	1.06154	0.816028	0.824703	1.62212			0.922584	1.26808	1.54457	1.73116	1.01544	1.19345
Danio_rerio_newGene_12448		Danio_rerio_newGene_12448	Danio_rerio_newGene_12448	ENSDART00000153997		1.6425	1.36543	1.35443	1.466	1.29142	1.59698			1.55501	1.40592	1.56709	1.44965	1.18381	0.817972
Danio_rerio_newGene_12457		Danio_rerio_newGene_12457	Danio_rerio_newGene_12457	ENSDART00000149567		0.323697	0.226795	0.276875	0.238192	0.219415	0.0954965			0.299723	0.161822	0.061571	0.234776	0.189514	0.346808
Danio_rerio_newGene_12458		Danio_rerio_newGene_12458	Danio_rerio_newGene_12458	XR_661640.1		3.42184	3.80724	3.42996	3.1638	3.16333	3.10515			3.21192	3.14291	3.61359	3.09399	3.71572	3.21037
Danio_rerio_newGene_1246		Danio_rerio_newGene_1246	Danio_rerio_newGene_1246	XR_661609.1		0.617222	0.504621	0.55974	0.357589	0.450861	0.535114			0.241668	0.39888	0.450099	0.280464	0.532557	0.344109
Danio_rerio_newGene_1247		Danio_rerio_newGene_1247	Danio_rerio_newGene_1247			2.63009	2.68862	2.74527	3.0359	2.96683	3.26792			1.68883	2.44359	2.16765	2.76808	2.89388	2.47839
Danio_rerio_newGene_12472		Danio_rerio_newGene_12472	Danio_rerio_newGene_12472			2.46553	2.9506	2.61555	3.13736	3.21122	3.32625			2.20917	2.30566	2.25124	2.56589	2.51374	1.12839
Danio_rerio_newGene_12475		Danio_rerio_newGene_12475	Danio_rerio_newGene_12475	XR_659854.1		1.88339	2.6755	2.12404	2.46135	2.42824	2.63957			1.88585	2.05449	1.89451	1.8702	2.25385	2.19848
Danio_rerio_newGene_12476		Danio_rerio_newGene_12476	Danio_rerio_newGene_12476	XR_662641.1		1.22162	1.46344	0.960331	0.99832	1.3759	1.58413			1.13397	1.32923	0.923016	1.14186	1.08996	1.18913
Danio_rerio_newGene_12477		Danio_rerio_newGene_12477	Danio_rerio_newGene_12477	ENSDART00000133482		0.49492	0.532617	0.499992	0.656356	0.47023	0.59099			0.64085	1.09645	0.654478	0.816258	0.526355	0.46527
Danio_rerio_newGene_12483		Danio_rerio_newGene_12483	Danio_rerio_newGene_12483			0.591146	1.43428	0.910867	1.13932	1.2732	1.96796			0.621298	0.845452	1.22803	0.875641	1.13461	1.22318
Danio_rerio_newGene_12484		Danio_rerio_newGene_12484	Danio_rerio_newGene_12484	XR_659856.1		1.03309	1.89852	1.24575	1.38541	1.12221	1.81264			0.387211	1.89843	0.787408	0.611624	1.4563	1.25298
Danio_rerio_newGene_12488		Danio_rerio_newGene_12488	Danio_rerio_newGene_12488	ENSDART00000155117		1.03302	0.835446	1.20864	1.32677	0.974811	0.72802			1.24732	1.29222	1.18528	1.39904	1.46697	0.909266
Danio_rerio_newGene_12489		Danio_rerio_newGene_12489	Danio_rerio_newGene_12489	XR_117764.3		1.09079	0.743737	1.11221	1.03451	1.02443	0.672125			1.4184	1.18055	0.961779	0.965782	0.863656	0.781057
Danio_rerio_newGene_12495		Danio_rerio_newGene_12495	Danio_rerio_newGene_12495	XR_660786.1		0.105865	0.119627	0.016903	0.387907	0.527432	0.48004			0	0	0	0.188949	0.648951	0.19292
Danio_rerio_newGene_12496		Danio_rerio_newGene_12496	Danio_rerio_newGene_12496	XR_660786.1		0.440528	1.47493	0.505311	2.14276	1.46035	1.08302			0.361653	1.23271	0.914382	1.31457	2.2104	2.0501
Danio_rerio_newGene_125		Danio_rerio_newGene_125	Danio_rerio_newGene_125			1.33762	1.44456	1.39907	1.61203	1.85493	1.54502			1.01579	1.47647	1.55823	1.81947	2.27891	2.18452
Danio_rerio_newGene_12502		Danio_rerio_newGene_12502	Danio_rerio_newGene_12502	XR_222346.2		0.10771	0.68903	0.710293	0.87569	0.768341	0.185894			0	0	0.188931	0.282645	0.329603	0.038571
Danio_rerio_newGene_12503		Danio_rerio_newGene_12503	Danio_rerio_newGene_12503	XR_659082.1		0.0968615	0.165098	0.466069	0.302157	0.176814	0.112067			0	0.250963	0.055576	0.033737	0.102099	0.041623
Danio_rerio_newGene_12504		Danio_rerio_newGene_12504	Danio_rerio_newGene_12504	XR_221953.2		0.461168	0.837263	0.683623	0.702539	0.923314	0.518215			0.474553	0.543005	0.411618	0.612801	1.2597	0.775092
Danio_rerio_newGene_12509		Danio_rerio_newGene_12509	Danio_rerio_newGene_12509	XR_223071.2		0.29217	0.236912	0.395371	0.358719	0.330831	0.410798			0.325316	0.242519	0.341497	0.353824	0.381474	0.273025
Danio_rerio_newGene_12511		Danio_rerio_newGene_12511	Danio_rerio_newGene_12511			0.211311	1.72221	1.28795	2.66156	1.83624	2.15707			1.22315	1.85133	1.11399	1.92483	2.82021	1.81391
Danio_rerio_newGene_12523		Danio_rerio_newGene_12523	Danio_rerio_newGene_12523			6.49733	5.31872	3.84597	4.3148	6.62076	4.63768			3.27729	4.24351	3.33739	5.78317	5.95458	3.92338
Danio_rerio_newGene_12527		Danio_rerio_newGene_12527	Danio_rerio_newGene_12527	ENSDART00000155099		0.088032	0.152032	0.418025	0.250225	0.187099	0.17882			0.270462	0.183798	0.227217	0.017054	0.122082	0.282486
Danio_rerio_newGene_12536		Danio_rerio_newGene_12536	Danio_rerio_newGene_12536	XR_661943.1		14.0028	11.1055	9.84011	7.52077	7.41371	7.32597			14.3241	10.6708	10.7946	10.2656	7.53758	5.92258
Danio_rerio_newGene_12537		Danio_rerio_newGene_12537	Danio_rerio_newGene_12537	XR_224929.2		0.538865	0.498414	0.535803	0.552906	1.98973	1.11035			0.275043	0.364758	0.546106	0.977452	1.86369	1.04817
Danio_rerio_newGene_1254		Danio_rerio_newGene_1254	Danio_rerio_newGene_1254			0	0.1417	0.198648	0.127297	0.162553	0.113941			0.273039	0.04689	0.050856	0.058633	0.0504315	0.175417
Danio_rerio_newGene_12540		Danio_rerio_newGene_12540	Danio_rerio_newGene_12540	ENSDART00000146516		9.70202	10.9776	11.9327	12.7367	14.2668	13.8979			9.0722	9.66095	13.705	13.2269	13.3759	13.0517
Danio_rerio_newGene_12547		Danio_rerio_newGene_12547	Danio_rerio_newGene_12547	XR_660825.1		1.51845	2.54802	1.88168	2.6566	2.84235	3.40019			1.19551	2.58963	1.38369	1.78747	2.51415	1.77997
Danio_rerio_newGene_12548		Danio_rerio_newGene_12548	Danio_rerio_newGene_12548	ledal35		2.34133	2.41059	1.9295	1.94722	1.64444	1.86126			1.95965	2.47846	2.06656	1.36376	1.79648	1.51764
Danio_rerio_newGene_12550		Danio_rerio_newGene_12550	Danio_rerio_newGene_12550	ENSDART00000157033		0.954886	0.613835	0.859509	0.990072	0.661138	0.833224			0.861611	1.08727	1.2785	0.541101	0.615754	0.655321
Danio_rerio_newGene_12559		Danio_rerio_newGene_12559	Danio_rerio_newGene_12559	XR_658866.1		1.0276	1.54823	1.26866	1.38701	1.76048	1.86969			0.762029	1.22608	0.97933	1.12782	1.40382	1.07141
Danio_rerio_newGene_12563		Danio_rerio_newGene_12563	Danio_rerio_newGene_12563			1.73708	1.89582	0.932578	0.682775	0.871957	1.18072			2.20723	1.89193	1.51027	1.21758	0.755586	0.725516
Danio_rerio_newGene_12564		Danio_rerio_newGene_12564	Danio_rerio_newGene_12564	XR_222666.2		0.714321	1.17918	0.541595	0.940402	1.11507	1.38502			0.805473	0.899072	1.15348	1.43678	1.35578	1.05247
Danio_rerio_newGene_12567		Danio_rerio_newGene_12567	Danio_rerio_newGene_12567	XR_661609.1		1.13564	1.05541	1.21839	1.94344	2.08815	1.65647			1.71023	1.77621	1.65346	1.62792	2.0586	1.63079
Danio_rerio_newGene_1257		Danio_rerio_newGene_1257	Danio_rerio_newGene_1257			0.977863	0.476269	0.848973	1.00663	1.40342	0.776381			0.669704	0.441676	0.964284	0.533567	0.754978	0.956773
Danio_rerio_newGene_12575		Danio_rerio_newGene_12575	Danio_rerio_newGene_12575	XR_224983.2		0.528181	0.344131	0.519554	0.373933	0.323597	0.352221			0.415596	0.524061	0.366723	0.410497	0.510271	0.17003
Danio_rerio_newGene_12580		Danio_rerio_newGene_12580	Danio_rerio_newGene_12580	XR_661613.1		2.0334	1.24625	1.45926	1.01187	1.35952	1.1753			1.25596	1.51978	1.30575	1.12961	1.40093	1.16278
Danio_rerio_newGene_12582		Danio_rerio_newGene_12582	Danio_rerio_newGene_12582			0.13042	0.026044	0.118883	0.0355495	0	0.0122165			0.006094	0	0	0.0896175	0.006012	0.0127905
Danio_rerio_newGene_12587		Danio_rerio_newGene_12587	Danio_rerio_newGene_12587	XR_663232.1		1.41	1.15724	1.78688	1.31021	1.83872	1.89198			1.12087	1.55617	0.939196	1.54138	1.05326	1.5332
Danio_rerio_newGene_12590		Danio_rerio_newGene_12590	Danio_rerio_newGene_12590	XR_224983.2		4.19693	4.8053	3.52898	4.2529	4.28911	4.25087			3.99226	5.21987	3.85263	4.39968	4.34055	2.63169
Danio_rerio_newGene_12592		Danio_rerio_newGene_12592	Danio_rerio_newGene_12592	XR_225027.2		0.299216	0.116853	0.0796755	0.143317	0.0756805	0.060519			0.310346	0.252094	0.1888	0.101597	0.156135	0.168833
Danio_rerio_newGene_12597		Danio_rerio_newGene_12597	Danio_rerio_newGene_12597	NONDRET002516		2.53531	3.28164	2.27841	3.90019	4.07915	2.55564			2.01023	2.97194	2.59893	2.31873	3.79876	2.8116
Danio_rerio_newGene_126		Danio_rerio_newGene_126	Danio_rerio_newGene_126	XR_659048.1		2.67568	1.4142	1.32781	0.823133	0.897212	0.899445			2.03889	1.16999	1.26967	1.01433	0.841238	0.990765
Danio_rerio_newGene_12601		Danio_rerio_newGene_12601	Danio_rerio_newGene_12601			0.246171	0.163194	0.22155	0.211009	0.326809	0.07428			0.632802	0.059877	0.360464	0.078814	0.354406	0.141913
Danio_rerio_newGene_12605		Danio_rerio_newGene_12605	Danio_rerio_newGene_12605	XR_225193.2		0.890471	0.523003	0.548399	0.716616	0.403947	0.645922			0.919451	1.36693	1.18782	0.855507	0.549917	0.65115
Danio_rerio_newGene_12606		Danio_rerio_newGene_12606	Danio_rerio_newGene_12606	mstx135		0	0.379115	0.0827405	0.294245	0	0.106235			0	0	0	0	0.0126185	0
Danio_rerio_newGene_12607		Danio_rerio_newGene_12607	Danio_rerio_newGene_12607	ENSDART00000155099		2.95837	3.35921	2.88618	3.35732	3.22458	3.6734			3.27793	3.30656	3.20829	3.02671	3.19419	2.86327
Danio_rerio_newGene_12608		Danio_rerio_newGene_12608	Danio_rerio_newGene_12608	ENSDART00000155099		4.60732	3.40357	4.02062	4.38583	5.22159	4.32482			4.06235	3.6984	3.22781	4.08706	4.68643	4.16901
Danio_rerio_newGene_12621		Danio_rerio_newGene_12621	Danio_rerio_newGene_12621	XR_660359.1		4.32829	4.99449	4.3758	5.51036	5.65581	6.34788			3.10058	3.97212	4.52715	4.25393	5.9464	5.90723
Danio_rerio_newGene_12622		Danio_rerio_newGene_12622	Danio_rerio_newGene_12622	XR_663313.1		7.25757	7.62223	6.40899	8.8138	10.0342	9.73333			6.21045	7.11157	7.5569	7.63186	9.12247	7.75717
Danio_rerio_newGene_12623		Danio_rerio_newGene_12623	Danio_rerio_newGene_12623			4.37132	5.15292	4.50217	5.26674	6.85758	6.91038			3.69164	4.71048	6.18049	5.43636	6.40738	5.96844
Danio_rerio_newGene_12627		Danio_rerio_newGene_12627	Danio_rerio_newGene_12627	ENSDART00000140235		3.26214	3.25291	3.47101	3.25219	3.61777	3.80054			2.51799	3.0241	2.13502	3.77684	3.4486	2.46481
Danio_rerio_newGene_12632		Danio_rerio_newGene_12632	Danio_rerio_newGene_12632	XR_082582.4		1.0958	0.991035	0.893626	0.881829	1.17266	1.58145			1.02867	0.830125	0.959936	0.83696	1.20983	1.24945
Danio_rerio_newGene_12637		Danio_rerio_newGene_12637	Danio_rerio_newGene_12637	XR_659744.1		14.8312	16.4963	19.3165	18.3057	21.1993	20.9071			13.9731	15.2907	14.8222	18.0223	20.7084	20.2833
Danio_rerio_newGene_12638		Danio_rerio_newGene_12638	Danio_rerio_newGene_12638			9.76888	8.31477	5.06414	8.02889	7.81217	8.77042			7.97235	7.49486	7.86907	6.70725	7.72897	10.3305
Danio_rerio_newGene_12641		Danio_rerio_newGene_12641	Danio_rerio_newGene_12641	XR_659898.1		3.39266	3.26817	3.31974	3.64268	4.52524	4.5929			2.5748	2.599	3.39793	4.02367	3.79998	5.57217
Danio_rerio_newGene_12646		Danio_rerio_newGene_12646	Danio_rerio_newGene_12646			0.816887	0.5813	0.858811	1.25614	0.71161	0.764764			1.44878	1.45044	1.56729	1.46886	1.36652	1.03532
Danio_rerio_newGene_12653		Danio_rerio_newGene_12653	Danio_rerio_newGene_12653	XR_661640.1		0.52853	0.304938	0.1863	0.245839	0.337891	0.252773			0.241247	0.350275	0.591911	0.278087	0.258987	0.294514
Danio_rerio_newGene_12660		Danio_rerio_newGene_12660	Danio_rerio_newGene_12660	ENSDART00000146017		5.30886	7.04489	6.68278	4.96789	7.88438	6.85497			6.68151	5.96494	5.09616	5.90977	5.93215	3.56603
Danio_rerio_newGene_12673		Danio_rerio_newGene_12673	Danio_rerio_newGene_12673	XR_225191.2		0.383675	0.462377	0.248321	0.333058	0.163464	0.140987			0.344421	0.942409	0.43763	0.258732	0.476565	0.370733
Danio_rerio_newGene_12674		Danio_rerio_newGene_12674	Danio_rerio_newGene_12674			1.02644	1.55739	1.34561	0.166781	0.244714	0.691524			0.979472	1.49509	1.0833	0.440385	0.279471	0.409309
Danio_rerio_newGene_12675		Danio_rerio_newGene_12675	Danio_rerio_newGene_12675	ENSDART00000149567		2.01256	2.84179	1.65478	2.4489	3.54079	3.36759			1.53855	1.85896	1.72316	2.06214	2.66164	1.88082
Danio_rerio_newGene_12697		Danio_rerio_newGene_12697	Danio_rerio_newGene_12697	ENSDART00000155099		1.06955	0.89942	0.493443	0.579164	0.684158	0.848854			0.500112	0.708633	0.809749	0.680669	0.772061	0.809262
Danio_rerio_newGene_12698		Danio_rerio_newGene_12698	Danio_rerio_newGene_12698	XR_223116.2		0.449684	0.448229	0.168384	0.416404	0.318599	0.36334			0.171503	0.329805	0.25805	0.2787	0.172261	0.193254
Danio_rerio_newGene_12699		Danio_rerio_newGene_12699	Danio_rerio_newGene_12699	XR_663232.1		0.561645	0.663882	0.583684	0.940568	0.51196	0.465666			0.849203	0.430446	0.6429	0.63295	0.364504	0.736312
Danio_rerio_newGene_12704		Danio_rerio_newGene_12704	Danio_rerio_newGene_12704	XR_223148.2		3.70559	4.40585	3.39446	4.45465	4.61777	3.70051			2.862	3.28855	3.76387	2.4897	4.10074	3.51493
Danio_rerio_newGene_12708		Danio_rerio_newGene_12708	Danio_rerio_newGene_12708			0.459393	0.879725	0.420227	0.555822	0.760169	0.766988			0.637545	0.650987	0.203211	0.510007	0.661925	0.746339
Danio_rerio_newGene_12716		Danio_rerio_newGene_12716	Danio_rerio_newGene_12716	NONDRET007648		2.54398	1.6741	2.17778	2.88764	2.13888	1.63866			1.93974	2.57058	3.04726	2.44329	2.22452	2.01934
Danio_rerio_newGene_12717		Danio_rerio_newGene_12717	Danio_rerio_newGene_12717			1.56502	1.34232	1.12576	1.11152	1.12075	1.54933			0.922432	1.62738	1.66903	2.00216	1.44181	0.801839
Danio_rerio_newGene_12718		Danio_rerio_newGene_12718	Danio_rerio_newGene_12718			0.513054	0.558141	0.629482	0.867047	0.740752	0.403688			1.08472	0.450474	0.934102	0.494277	1.05518	1.036
Danio_rerio_newGene_12725		Danio_rerio_newGene_12725	Danio_rerio_newGene_12725	XR_662409.1		1.2865	1.13529	1.82515	1.21045	1.34855	1.61912			1.14731	1.28858	1.06954	1.66472	1.65462	1.49334
Danio_rerio_newGene_12726		Danio_rerio_newGene_12726	Danio_rerio_newGene_12726	NONDRET007649		0.179126	0.44147	0.173382	0.600967	0.331909	0.243685			0.256655	0.315751	0.178805	0.287761	0.272838	0.8794
Danio_rerio_newGene_12727		Danio_rerio_newGene_12727	Danio_rerio_newGene_12727	XR_660816.1		4.44467	4.57477	4.91068	5.12985	5.98626	5.33749			5.05088	4.31373	4.59002	5.125	5.46695	4.81714
Danio_rerio_newGene_12738		Danio_rerio_newGene_12738	Danio_rerio_newGene_12738			3.10126	4.90427	3.31583	3.94445	4.77806	4.22775			4.13263	3.67208	3.45864	3.83683	4.96249	3.67882
Danio_rerio_newGene_12745		Danio_rerio_newGene_12745	Danio_rerio_newGene_12745	ENSDART00000155901		0.209062	0.154231	0.182864	0.07262	0.0897965	0.0851525			0	0.026742	0.164739	0.143157	0.0226375	0.022526
Danio_rerio_newGene_1275		Danio_rerio_newGene_1275	Danio_rerio_newGene_1275	ENSDART00000126328		0.957904	0.975919	0.733762	1.12826	0.27661	0.884739			0.620668	1.43532	0.820813	1.39276	0.55188	0.805307
Danio_rerio_newGene_12751		Danio_rerio_newGene_12751	Danio_rerio_newGene_12751	XR_223148.2		0.648158	0.733854	0.417125	0.684334	0.546311	0.735843			0.814241	0.71814	0.685279	0.787817	0.595551	0.461668
Danio_rerio_newGene_12754		Danio_rerio_newGene_12754	Danio_rerio_newGene_12754			2.61551	5.24782	3.29648	2.99328	4.19884	3.30928			2.40614	3.20182	2.54114	2.30945	3.37764	3.28812
Danio_rerio_newGene_12763		Danio_rerio_newGene_12763	Danio_rerio_newGene_12763	XR_662462.1		0.056794	0.273913	0.193392	0.177782	0.131934	0.288915			0.0424045	0.190091	0	0.241871	0.167478	0.236488
Danio_rerio_newGene_12764		Danio_rerio_newGene_12764	Danio_rerio_newGene_12764			1.56782	2.14326	2.01086	1.88916	1.60108	1.60781			1.44964	2.59281	2.07551	0.922972	1.58029	1.59606
Danio_rerio_newGene_12776		Danio_rerio_newGene_12776	Danio_rerio_newGene_12776	XR_224941.2		1.35047	1.44011	1.13663	1.45626	1.52721	1.1626			1.54208	1.18702	1.17684	1.34788	1.37853	0.201012
Danio_rerio_newGene_12777		Danio_rerio_newGene_12777	Danio_rerio_newGene_12777	XR_658866.1		3.28591	2.27116	3.36782	3.11702	2.68335	2.70893			2.89545	4.00115	2.34553	3.13835	2.44583	2.59491
Danio_rerio_newGene_12783		Danio_rerio_newGene_12783	Danio_rerio_newGene_12783	XR_659917.1		0.936588	1.27863	0.907995	0.529914	1.60715	0.513802			0.775312	1.06694	0.648641	0.738997	0.905346	1.39024
Danio_rerio_newGene_12784		Danio_rerio_newGene_12784	Danio_rerio_newGene_12784	XR_659917.1		0.457936	0.568021	0.124509	0.0786905	0.089901	0.447215			0.498989	0.532142	0.564518	0.193711	0.149628	0.60885
Danio_rerio_newGene_12787		Danio_rerio_newGene_12787	Danio_rerio_newGene_12787			5.88347	8.357	6.03435	4.55547	8.24212	8.11163			4.98074	5.84671	4.99445	5.78787	6.67901	7.02772
Danio_rerio_newGene_12794		Danio_rerio_newGene_12794	Danio_rerio_newGene_12794	ledal35		4.63228	5.0529	4.18596	4.69967	4.69347	4.99302			4.19968	4.67382	4.41173	4.25151	4.7068	3.47521
Danio_rerio_newGene_12799		Danio_rerio_newGene_12799	Danio_rerio_newGene_12799	ENSDART00000153997		0.405274	0.452194	0.372551	0.442117	0.263016	0.495563			0.331539	0.53956	0.59339	0.242915	0.450647	0.559551
Danio_rerio_newGene_1280		Danio_rerio_newGene_1280	Danio_rerio_newGene_1280	ENSDART00000157120		1.37143	0.835011	0.606242	0.835422	0.720222	0.882637			1.56609	0.785268	0.771173	0.839473	0.694306	0.470322
Danio_rerio_newGene_12811		Danio_rerio_newGene_12811	Danio_rerio_newGene_12811	ENSDART00000140235		0.138436	0.058073	0.249297	0.339665	0.0242795	0.0369785			0.099209	0.843927	0.261672	0.241413	0.356385	0.219646
Danio_rerio_newGene_1282		Danio_rerio_newGene_1282	Danio_rerio_newGene_1282	ENSDART00000157036		0.23182	0.472388	0.340355	0.979433	0.422902	0.413844			0.115539	0.41184	0.112397	0.257441	0.327509	0.460191
Danio_rerio_newGene_12828		Danio_rerio_newGene_12828	Danio_rerio_newGene_12828			2.53361	1.26233	2.60334	1.39364	2.34248	1.44952			2.43953	0.954401	2.9395	2.04694	3.04107	2.5085
Danio_rerio_newGene_1283		Danio_rerio_newGene_1283	Danio_rerio_newGene_1283	ENSDART00000157036		1.22718	0.559371	0.821736	0.25383	0.74083	1.00761			1.47419	0.241362	0.426862	0.24125	0.409681	0.202882
Danio_rerio_newGene_1284		Danio_rerio_newGene_1284	Danio_rerio_newGene_1284	NONDRET002600		1.41924	1.50865	1.20406	0.789506	1.03002	0.859209			1.35714	2.09174	1.18429	1.43327	0.629847	0.763155
Danio_rerio_newGene_12843		Danio_rerio_newGene_12843	Danio_rerio_newGene_12843			0.140353	0.261891	0.235142	0.253043	0.167844	0.223584			0.172723	0.273999	0.357662	0.125192	0.216122	0.237488
Danio_rerio_newGene_12847		Danio_rerio_newGene_12847	Danio_rerio_newGene_12847	XR_661230.1		0.378841	0.301411	0.2925	0.330281	0.33274	0.106117			0.314976	0.442348	0.424768	0.415343	0.426814	0.434554
Danio_rerio_newGene_12848		Danio_rerio_newGene_12848	Danio_rerio_newGene_12848	XR_224524.2		0.716363	1.35775	0.857889	0.969739	0.880262	0.925959			0.511975	0.97011	0.832828	1.01112	0.913969	0.819131
Danio_rerio_newGene_12856		Danio_rerio_newGene_12856	Danio_rerio_newGene_12856	XR_660359.1		0.416444	0.400858	0.053951	0.144099	0.372416	0.439473			0.259421	0.344737	0.435273	0.191509	0.26724	0.363775
Danio_rerio_newGene_1286		Danio_rerio_newGene_1286	Danio_rerio_newGene_1286	hrid16		1.08928	1.59541	1.6785	1.215	1.99399	2.005			1.44922	1.58931	1.70677	2.01967	2.05361	1.66792
Danio_rerio_newGene_12892		Danio_rerio_newGene_12892	Danio_rerio_newGene_12892			0.938878	0.952591	1.11787	1.60509	3.20285	2.49149			0.301193	0.254647	1.56412	1.34451	1.54781	1.57945
Danio_rerio_newGene_12901		Danio_rerio_newGene_12901	Danio_rerio_newGene_12901	ENSDART00000154902		0.356573	0.424087	0.642654	0.529964	0.412204	0.311111			0.416413	0.3317	0.452129	0.486986	0.571878	0.438222
Danio_rerio_newGene_12910		Danio_rerio_newGene_12910	Danio_rerio_newGene_12910			0.24004	0	0	0.12069	0.20512	0.105233			0.08618	0	0.272524	0	0.078423	0.0317425
Danio_rerio_newGene_12914		Danio_rerio_newGene_12914	Danio_rerio_newGene_12914			1.38293	1.84386	1.14468	1.36994	1.56591	1.61945			0.847465	1.16637	1.36544	1.44484	1.45901	1.43874
Danio_rerio_newGene_12916		Danio_rerio_newGene_12916	Danio_rerio_newGene_12916	ENSDART00000149567		0.703596	0.665059	0.588487	0.654473	1.12134	1.29215			0.354675	0.72554	0.673327	0.595892	0.922372	0.639922
Danio_rerio_newGene_12917		Danio_rerio_newGene_12917	Danio_rerio_newGene_12917	XR_662186.1		0.109131	0.219728	0.016061	0.221848	0.232766	0.288195			0.453183	0.346551	0.216554	0.222663	0.144773	0.220149
Danio_rerio_newGene_12953		Danio_rerio_newGene_12953	Danio_rerio_newGene_12953	XR_082582.4		8.89589	9.442	8.22997	10.1073	7.47954	9.12666			7.90097	7.58538	8.25694	7.92343	8.73239	10.2583
Danio_rerio_newGene_12955		Danio_rerio_newGene_12955	Danio_rerio_newGene_12955	XR_661013.1		0.570275	0.527757	0.359352	0.72226	0.503912	0.223713			0.825174	0.787764	0.905995	0.686128	0.719816	0.702888
Danio_rerio_newGene_12958		Danio_rerio_newGene_12958	Danio_rerio_newGene_12958	XR_659932.1		0.0575365	0.1422	0.082255	0.136897	0.129103	0.209132			0.201384	0.240703	0.118327	0.116295	0.101897	0.104929
Danio_rerio_newGene_1296		Danio_rerio_newGene_1296	Danio_rerio_newGene_1296	ENSDART00000140235		0.317559	0.072238	0.471176	0.166786	0.409882	0.214662			0.552364	0.20178	0.101656	0.44164	0.251381	0.148306
Danio_rerio_newGene_12960		Danio_rerio_newGene_12960	Danio_rerio_newGene_12960	XR_659933.1		0.621063	0.89329	0.917323	0.984208	0.693887	0.874018			0.929565	0.501704	0.678943	0.723483	0.922732	0.543171
Danio_rerio_newGene_12964		Danio_rerio_newGene_12964	Danio_rerio_newGene_12964			0.336588	0.174851	0.233634	0.287301	0.215235	0.203912			0.096481	0.238026	0.11367	0.139673	0.139574	0.162177
Danio_rerio_newGene_12972		Danio_rerio_newGene_12972	Danio_rerio_newGene_12972	XR_660786.1		0.609424	0.898425	0.225025	0.732239	0.835092	0.735085			0.603046	0.456735	0.369455	1.00316	0.581231	0.545555
Danio_rerio_newGene_1298		Danio_rerio_newGene_1298	Danio_rerio_newGene_1298	XR_659585.1		0.712179	0.438235	0.603548	0.474001	0.599921	0.654627			0.883638	0.85493	0.782644	0.564719	0.650834	0.792706
Danio_rerio_newGene_1299		Danio_rerio_newGene_1299	Danio_rerio_newGene_1299	XR_662260.1		2.55568	3.19362	2.26386	2.52509	2.73475	3.13763			1.75981	2.36948	2.12492	2.31391	2.56042	2.12303
Danio_rerio_newGene_13023		Danio_rerio_newGene_13023	Danio_rerio_newGene_13023	ENSDART00000154394		15.9867	25.6188	16.9296	25.0194	18.3925	17.8482			16.7582	38.8998	12.9708	15.3891	18.0067	18.4276
Danio_rerio_newGene_13046		Danio_rerio_newGene_13046	Danio_rerio_newGene_13046	XR_662934.1		0.239469	0.34949	0.456301	0.485501	0.154275	0.33808			0.376215	0.467676	0.748477	1.23515	0.696782	0.373732
Danio_rerio_newGene_1307		Danio_rerio_newGene_1307	Danio_rerio_newGene_1307	XR_658409.1		0.830625	0.740277	0.495082	0.922513	0.52585	0.631001			0.680929	0.816245	0.638992	0.845413	0.940215	0.519247
Danio_rerio_newGene_13075		Danio_rerio_newGene_13075	Danio_rerio_newGene_13075	ENSDART00000155972		1.48754	1.29851	1.04146	1.27553	1.25976	1.50738			1.49229	1.2186	1.10758	1.06993	1.16593	0.975557
Danio_rerio_newGene_13076		Danio_rerio_newGene_13076	Danio_rerio_newGene_13076	XR_659340.1		0.545699	0.349181	0.404813	0.178309	0.16655	0.342028			0.376045	0.439054	0.582203	0.623746	0.262133	0.26708
Danio_rerio_newGene_13081		Danio_rerio_newGene_13081	Danio_rerio_newGene_13081	ENSDART00000136899		0.301613	0.021166	0	0.344139	0.32652	0.0775565			0	0	0.0810385	0	0.110725	0
Danio_rerio_newGene_13093		Danio_rerio_newGene_13093	Danio_rerio_newGene_13093	XR_659797.1		0.219505	0.0834295	0.346855	0.273438	0.302071	0.207143			0.139383	0.234541	0.128927	0.601733	0.376226	0.260725
Danio_rerio_newGene_13097		Danio_rerio_newGene_13097	Danio_rerio_newGene_13097	ENSDART00000144134		0.177482	0.0582275	0.22076	0.179689	0.203139	0.296483			0.099631	0.146172	0.135326	0.193302	0.140281	0.207756
Danio_rerio_newGene_13126		Danio_rerio_newGene_13126	Danio_rerio_newGene_13126			1.97423	2.23877	1.27883	2.07427	1.27619	1.65458			2.06968	2.16758	2.66951	1.53232	1.68547	1.67673
Danio_rerio_newGene_13138		Danio_rerio_newGene_13138	Danio_rerio_newGene_13138	XR_659966.1		12.9997	15.3421	12.0046	13.8482	12.9836	15.1587			12.3389	13.1299	11.4618	9.71047	13.1121	11.3688
Danio_rerio_newGene_13139		Danio_rerio_newGene_13139	Danio_rerio_newGene_13139	XR_660825.1		1.30679	0.801829	0.587661	1.23611	0.917932	0.98945			0.808506	0.963744	1.01648	1.41864	0.646744	1.07653
Danio_rerio_newGene_13140		Danio_rerio_newGene_13140	Danio_rerio_newGene_13140			0.133235	0.187718	0.149752	0.224349	0.041475	0.220913			0.033877	0.228159	0.192611	0.169917	0.102088	0.174251
Danio_rerio_newGene_13154		Danio_rerio_newGene_13154	Danio_rerio_newGene_13154			9.90333	13.6167	14.0903	15.7547	16.1579	18.1792			10.0554	12.3798	14.4827	15.5087	17.3487	13.3292
Danio_rerio_newGene_13155		Danio_rerio_newGene_13155	Danio_rerio_newGene_13155			1.84721	2.65617	2.25595	2.6149	3.04307	3.42479			1.80867	2.17126	1.88567	2.13266	2.76028	2.40943
Danio_rerio_newGene_13164		Danio_rerio_newGene_13164	Danio_rerio_newGene_13164	XR_662186.1		0.61654	0.374501	0.203288	0.313841	0.487797	0.0879305			0.140038	0.106398	0.15901	0.0240625	0.099841	0.211561
Danio_rerio_newGene_132		Danio_rerio_newGene_132	Danio_rerio_newGene_132	XR_659721.1		0.155751	0.12603	0.079214	0.127495	0.270765	0.165913			0.16808	0.197366	0.098216	0.317546	0.124025	0.161072
Danio_rerio_newGene_1320		Danio_rerio_newGene_1320	Danio_rerio_newGene_1320	XR_663251.1		2.18406	2.59698	2.09391	2.88894	2.89237	2.72773			1.15739	2.20777	1.91212	2.7059	2.62225	2.77825
Danio_rerio_newGene_13215		Danio_rerio_newGene_13215	Danio_rerio_newGene_13215	XR_661644.1		0.777158	2.63333	1.20746	0.67242	1.73055	1.55141			0.487159	0.855996	0.441574	0.736052	1.02138	2.12421
Danio_rerio_newGene_13216		Danio_rerio_newGene_13216	Danio_rerio_newGene_13216			0.186166	0.204633	0.194298	0.266888	0.0623485	0.0195055			0.500759	0.589236	0.570639	0.756867	0.287072	0.362571
Danio_rerio_newGene_13226		Danio_rerio_newGene_13226	Danio_rerio_newGene_13226	XR_660480.1		0.207535	0.861597	0.110504	0.1134	0.19582	0.254785			0.155774	0.496405	0.233986	0.302613	0.230215	0.548397
Danio_rerio_newGene_1323		Danio_rerio_newGene_1323	Danio_rerio_newGene_1323	XR_663098.1		1.06565	0.98269	0.949199	0.972329	0.836361	0.920387			0.783892	1.18809	0.79687	1.01298	0.929898	0.729428
Danio_rerio_newGene_13242		Danio_rerio_newGene_13242	Danio_rerio_newGene_13242	XR_221953.2		10.622	12.331	9.35138	13.1778	15.2295	12.6029			11.3392	11.2004	11.5996	11.1812	10.1145	11.2243
Danio_rerio_newGene_13266		Danio_rerio_newGene_13266	Danio_rerio_newGene_13266	XR_658686.1		0.123955	0.126029	0.0900995	0.39733	0.249876	0.454247			0.0594635	0.175743	0.11481	0.500743	0.254076	0.063554
Danio_rerio_newGene_13271		Danio_rerio_newGene_13271	Danio_rerio_newGene_13271	XR_661479.1		0	0.144246	0.1361	0.224944	0	0.0601765			0	0	0.061434	0.053811	0.0481065	0
Danio_rerio_newGene_13289		Danio_rerio_newGene_13289	Danio_rerio_newGene_13289	ENSDART00000153855		2.99556	2.49054	1.7072	1.90068	1.71458	2.13843			2.41255	2.2231	2.43524	1.96036	1.71778	1.03871
Danio_rerio_newGene_13312		Danio_rerio_newGene_13312	Danio_rerio_newGene_13312	ENSDART00000157045		0.758899	0.855665	0.504698	0.721208	0.249326	0.41311			0.697582	0.755171	0.663795	0.468313	0.495706	0.273962
Danio_rerio_newGene_13313		Danio_rerio_newGene_13313	Danio_rerio_newGene_13313	ENSDART00000156870		2.99194	5.18754	1.88955	2.30258	1.56945	1.82316			2.54184	2.87405	1.72146	1.18483	2.3144	2.83419
Danio_rerio_newGene_13315		Danio_rerio_newGene_13315	Danio_rerio_newGene_13315	ENSDART00000067056		1.44939	1.53815	1.5066	1.33591	1.17944	0.76819			1.19892	1.26482	0.988376	1.20795	0.751335	0.562356
Danio_rerio_newGene_13326		Danio_rerio_newGene_13326	Danio_rerio_newGene_13326	ENSDART00000154846		3.63428	3.15044	2.83008	2.69911	3.01393	2.62371			3.21607	2.95471	3.04445	2.64659	2.5578	1.69862
Danio_rerio_newGene_13330		Danio_rerio_newGene_13330	Danio_rerio_newGene_13330	XR_221953.2		1.61958	2.06931	1.74934	1.6486	1.37576	1.17519			2.00702	2.4679	2.03218	1.76086	1.27951	1.23178
Danio_rerio_newGene_13332		Danio_rerio_newGene_13332	Danio_rerio_newGene_13332	XR_225260.2		1.4529	1.90767	1.82082	1.59577	1.79473	1.72783			1.68983	1.78254	1.33143	1.66493	1.85846	1.25207
Danio_rerio_newGene_13341		Danio_rerio_newGene_13341	Danio_rerio_newGene_13341	ENSDART00000156113		0.108248	0.300646	0.236439	0.300383	0.364455	0.137147			0.172899	0.066785	0.0256415	0.413315	0.138873	0.242498
Danio_rerio_newGene_13350		Danio_rerio_newGene_13350	Danio_rerio_newGene_13350	XR_225191.2		0.553836	0.885866	0.336167	0.799784	0.917003	0.808248			0.483597	0.641726	0.453113	0.428253	0.474571	0.768857
Danio_rerio_newGene_13354		Danio_rerio_newGene_13354	Danio_rerio_newGene_13354	XR_660359.1		8.43255	7.0583	6.32644	4.4668	4.44229	3.88374			8.21099	7.95724	7.72959	6.95055	5.33292	5.39153
Danio_rerio_newGene_13356		Danio_rerio_newGene_13356	Danio_rerio_newGene_13356			0.306098	0.467604	0.237205	0.398263	0.279353	0.361333			0.169333	0.24651	0.303514	0.307911	0.221336	0.217799
Danio_rerio_newGene_13359		Danio_rerio_newGene_13359	Danio_rerio_newGene_13359	XR_225193.2		1.01832	1.57033	0.733414	1.08832	0.498563	0.931283			0.281873	0.376179	1.16739	1.05082	1.1172	1.34832
Danio_rerio_newGene_13365		Danio_rerio_newGene_13365	Danio_rerio_newGene_13365	XR_662197.1		0	0	0	0.117315	0	0.224936			0	0.154718	0	0	0	0
Danio_rerio_newGene_13375		Danio_rerio_newGene_13375	Danio_rerio_newGene_13375	XR_660825.1		3.25554	1.61316	1.59638	1.48245	0.977057	1.11558			2.29465	3.05727	1.84721	1.64751	0.945607	1.51637
Danio_rerio_newGene_13377		Danio_rerio_newGene_13377	Danio_rerio_newGene_13377	XR_223148.2		0.246279	0.136154	0.557211	0.101557	0	0.265707			0.341304	0.188359	0.406107	0	0.11184	0.298421
Danio_rerio_newGene_13392		Danio_rerio_newGene_13392	Danio_rerio_newGene_13392	ENSDART00000155105		6.169	6.53063	8.15541	9.50147	9.14485	8.7681			5.77915	6.35988	7.31821	8.35356	9.04764	6.51545
Danio_rerio_newGene_13397		Danio_rerio_newGene_13397	Danio_rerio_newGene_13397			5.73977	5.35751	5.25141	6.35585	6.54957	5.65718			4.93992	5.09588	4.86391	7.8165	5.49937	4.66052
Danio_rerio_newGene_134		Danio_rerio_newGene_134	Danio_rerio_newGene_134	XR_224934.2		2.5023	2.61077	1.81711	1.36224	1.91812	2.59248			2.73288	3.16682	2.28182	3.07069	3.21691	2.23533
Danio_rerio_newGene_13421		Danio_rerio_newGene_13421	Danio_rerio_newGene_13421	XR_659324.1		1.59629	1.94887	1.69702	1.18545	1.53281	1.45539			2.09999	1.27133	1.38294	0.916592	1.55542	1.12483
Danio_rerio_newGene_13424		Danio_rerio_newGene_13424	Danio_rerio_newGene_13424			1.12577	2.46914	1.56222	1.48655	1.11775	1.51648			0.378789	2.44717	1.6554	0.9368	1.61028	1.04861
Danio_rerio_newGene_13431		Danio_rerio_newGene_13431	Danio_rerio_newGene_13431	XR_658229.1		0.529309	0.468979	0	0.36405	0.116964	0.254061			0.536613	0	0	0	0.197806	0.114265
Danio_rerio_newGene_13449		Danio_rerio_newGene_13449	Danio_rerio_newGene_13449	XR_659194.1		0.670122	0.372595	0.303427	0.468183	0.417113	0.463603			0.577051	0.465375	0.377458	0.305341	0.501313	0.409547
Danio_rerio_newGene_13454		Danio_rerio_newGene_13454	Danio_rerio_newGene_13454	XR_223404.2		3.82101	4.57955	4.33595	3.9456	4.34072	4.99503			4.39602	4.16971	3.85082	3.99788	4.47959	2.8819
Danio_rerio_newGene_13461		Danio_rerio_newGene_13461	Danio_rerio_newGene_13461	NONDRET001051		5.03404	5.57036	4.52112	4.76546	5.41389	6.82919			3.90393	4.70865	3.13741	4.9324	4.92622	4.69063
Danio_rerio_newGene_13487		Danio_rerio_newGene_13487	Danio_rerio_newGene_13487	XR_662186.1		0.12938	0.126591	0.308622	0.083431	0	0.334157			0	0	0	0	0	0
Danio_rerio_newGene_13493		Danio_rerio_newGene_13493	Danio_rerio_newGene_13493			0.166733	0.583894	0.168511	0.136436	0.376379	0.278259			0.202405	0.285786	0.134283	0.29027	0.551215	0.173795
Danio_rerio_newGene_13494		Danio_rerio_newGene_13494	Danio_rerio_newGene_13494			0.530401	0.291973	0.713464	0.226542	0.385193	0.414643			0.301341	0.778788	0.5978	0.340265	0.0686225	0.0074585
[truncated: 2,731 more rows]

## Sheet: Supplementary Table S4
Supplementary Table S4. Rhythmicity analysis of the expression profiles of zebrafish larval lncRNAs under DD condition by MetaCycle.
[truncated: 3,222 more rows]

[truncated: 48 more sheets: Supplementary Table S5, Supplementary Table S6, Supplementary Table S7, Supplementary Table S8, Supplementary Table S9, Supplementary Table S10, Supplementary Table S11, Supplementary Table S12, Supplementary Table S13, Supplementary Table S14, Sheet4, Supplementary Table S15, Supplementary Table S16, Supplementary Table S17, Supplementary Table S18, Supplementary Table S19, Supplementary Table S20, Supplementary Table S21, Supplementary Table S22, Supplementary Table S23 …]
